# Supplementary material for: Pathogenomics of Virulence Traits of Plesiomonas shigelloides That Were Deemed Inconclusive by Traditional Experimental Approaches
Source: Front Microbiol. 2018 Dec 21;9:3077. doi: 10.3389/fmicb.2018.03077 (PMC6309461; doi:10.3389/fmicb.2018.03077)
Supplement: DATA SHEETS S1–S4 — Detailed VRprofile query outputs for the four P. shigelloides genomes. [file Data_Sheet_1.XLSX]

## Sheet: Sheet1
VRprofile
Ha-values for the genes in the subject genome against the query databases
								VF		AR		T3SE		T4SE		T6SE		T7SE		Prophage		ICE		T3SS		T4SS		T6SS		T7SS		Integron		IS		PAI		ARI
No	Synonym	Start	End	Strand	Length(aa)	Gene	Product	Hit	Ha-value	Hit	Ha-value	Hit	Ha-value	Hit	Ha-value	Hit	Ha-value	Hit	Ha-value	Hit	Ha-value	Hit	Ha-value	Hit	Ha-value	Hit	Ha-value	Hit	Ha-value	Hit	Ha-value	Hit	Ha-value	Hit	Ha-value	Hit	Ha-value	Hit	Ha-value
1	ORF1_1	298	663	+	121	ORF1_1	Predicted ORF	-	-	-	-	-	-	-	-	-	-	-	-	-	-	-	-	-	-	-	-	-	-	-	-	-	-	-	-	-	-	-	-
2	ORF1_4	5277	6326	-	349	ORF1_4	Predicted ORF	-	-	-	-	-	-	-	-	-	-	-	-	-	-	-	-	-	-	-	-	-	-	-	-	-	-	-	-	-	-	-	-
3	ORF1_6	7168	7998	-	276	ORF1_6	Predicted ORF	-	-	-	-	-	-	-	-	-	-	-	-	-	-	-	-	-	-	-	-	-	-	-	-	-	-	-	-	-	-	-	-
4	ORF1_8	9171	9614	-	147	ORF1_8	Predicted ORF	-	-	-	-	-	-	-	-	-	-	-	-	-	-	-	-	-	-	-	-	-	-	-	-	-	-	-	-	-	-	-	-
5	ORF1_9	9676	10566	-	296	ORF1_9	Predicted ORF	-	-	-	-	-	-	-	-	-	-	-	-	-	-	-	-	-	-	-	-	-	-	-	-	-	-	-	-	-	-	-	-
6	ORF1_10	10556	11320	-	254	ORF1_10	Predicted ORF	-	-	-	-	-	-	-	-	-	-	-	-	-	-	-	-	-	-	-	-	-	-	-	-	-	-	-	-	-	-	-	-
7	ORF1_11	11348	11848	-	166	ORF1_11	Predicted ORF	-	-	-	-	-	-	-	-	-	-	-	-	-	-	-	-	-	-	-	-	-	-	-	-	-	-	-	-	-	-	-	-
8	ORF1_12	11868	13037	-	389	ORF1_12	Predicted ORF	-	-	-	-	-	-	-	-	-	-	-	-	-	-	-	-	-	-	-	-	-	-	-	-	-	-	-	-	-	-	-	-
9	ORF1_13	13050	14327	-	425	ORF1_13	Predicted ORF	-	-	-	-	-	-	-	-	-	-	-	-	-	-	-	-	-	-	-	-	-	-	-	-	-	-	-	-	-	-	-	-
10	ORF1_16	17133	17861	+	242	ORF1_16	Predicted ORF	-	-	-	-	-	-	-	-	-	-	-	-	-	-	-	-	-	-	-	-	-	-	-	-	-	-	-	-	-	-	-	-
11	ORF1_17	18009	19247	+	412	ORF1_17	Predicted ORF	-	-	-	-	-	-	-	-	-	-	-	-	-	-	-	-	-	-	-	-	-	-	-	-	-	-	-	-	-	-	-	-
12	ORF1_19	20990	22522	+	510	ORF1_19	Predicted ORF	-	-	-	-	-	-	-	-	-	-	-	-	-	-	-	-	-	-	-	-	-	-	-	-	-	-	-	-	-	-	-	-
13	ORF1_21	23693	24622	+	309	ORF1_21	Predicted ORF	-	-	-	-	-	-	-	-	-	-	-	-	-	-	-	-	-	-	-	-	-	-	-	-	-	-	-	-	-	-	-	-
14	ORF1_22	24680	25258	+	192	ORF1_22	Predicted ORF	-	-	-	-	-	-	-	-	-	-	-	-	-	-	-	-	-	-	-	-	-	-	-	-	-	-	-	-	-	-	-	-
15	ORF1_24	25824	26186	-	120	ORF1_24	Predicted ORF	-	-	-	-	-	-	-	-	-	-	-	-	-	-	-	-	-	-	-	-	-	-	-	-	-	-	-	-	-	-	-	-
16	ORF1_27	32870	34546	+	558	ORF1_27	Predicted ORF	-	-	-	-	-	-	-	-	-	-	-	-	-	-	-	-	-	-	-	-	-	-	-	-	-	-	-	-	-	-	-	-
17	ORF1_28	34718	35701	+	327	ORF1_28	Predicted ORF	-	-	-	-	-	-	-	-	-	-	-	-	-	-	-	-	-	-	-	-	-	-	-	-	-	-	-	-	-	-	-	-
18	ORF1_29	35704	36603	+	299	ORF1_29	Predicted ORF	-	-	-	-	-	-	-	-	-	-	-	-	-	-	-	-	-	-	-	-	-	-	-	-	-	-	-	-	-	-	-	-
19	ORF1_32	38604	40310	+	568	ORF1_32	Predicted ORF	-	-	-	-	-	-	-	-	-	-	-	-	-	-	-	-	-	-	-	-	-	-	-	-	-	-	-	-	-	-	-	-
20	ORF1_33	40303	41199	+	298	ORF1_33	Predicted ORF	-	-	-	-	-	-	-	-	-	-	-	-	-	-	-	-	-	-	-	-	-	-	-	-	-	-	-	-	-	-	-	-
21	ORF1_34	41210	43183	+	657	ORF1_34	Predicted ORF	-	-	-	-	-	-	-	-	-	-	-	-	-	-	-	-	-	-	-	-	-	-	-	-	-	-	-	-	-	-	-	-
22	ORF2_1	47695	48501	+	268	ORF2_1	Predicted ORF	-	-	-	-	-	-	-	-	-	-	-	-	-	-	-	-	-	-	-	-	-	-	-	-	-	-	-	-	-	-	-	-
23	ORF2_3	50557	51528	+	323	ORF2_3	Predicted ORF;	-	-	-	-	-	-	-	-	-	-	-	-	-	-	-	-	-	-	-	-	-	-	-	-	-	-	-	-	PAI_208972754	0.464	ARI_481190489	0.433
24	ORF2_5	54504	55529	+	341	ORF2_5	Predicted ORF	-	-	-	-	-	-	-	-	-	-	-	-	-	-	-	-	-	-	-	-	-	-	-	-	-	-	-	-	-	-	-	-
25	ORF2_7	56399	57562	+	387	ORF2_7	Predicted ORF	-	-	-	-	-	-	-	-	-	-	-	-	-	-	-	-	-	-	-	-	-	-	-	-	-	-	-	-	-	-	-	-
26	ORF2_9	60247	60948	+	233	ORF2_9	Predicted ORF	-	-	-	-	-	-	-	-	-	-	-	-	-	-	-	-	-	-	-	-	-	-	-	-	-	-	-	-	-	-	-	-
27	ORF2_13	63458	65425	-	655	ORF2_13	Predicted ORF;	-	-	-	-	-	-	-	-	-	-	-	-	-	-	-	-	-	-	-	-	-	-	-	-	-	-	-	-	-	-	ARI_24461535	0.527
28	ORF2_15	65925	66167	-	80	ORF2_15	Predicted ORF	-	-	-	-	-	-	-	-	-	-	-	-	-	-	-	-	-	-	-	-	-	-	-	-	-	-	-	-	-	-	-	-
29	ORF2_16	66164	66937	-	257	ORF2_16	Predicted ORF;	VFG1856	0.482	-	-	-	-	-	-	-	-	-	-	-	-	-	-	-	-	-	-	-	-	-	-	-	-	-	-	-	-	ARI_24461538	0.455
30	ORF2_17	67275	67934	-	219	ORF2_17	Predicted ORF;	-	-	-	-	-	-	-	-	-	-	-	-	-	-	-	-	-	-	-	-	-	-	-	-	-	-	-	-	-	-	ARI_24461539	0.498
31	ORF2_19	68982	69842	-	286	ORF2_19	Predicted ORF	-	-	-	-	-	-	-	-	-	-	-	-	-	-	-	-	-	-	-	-	-	-	-	-	-	-	-	-	-	-	-	-
32	ORF2_20	69970	71592	-	540	ORF2_20	Predicted ORF	-	-	-	-	-	-	-	-	-	-	-	-	-	-	-	-	-	-	-	-	-	-	-	-	-	-	-	-	-	-	-	-
33	ORF2_21	71656	73434	-	592	ORF2_21	Predicted ORF	-	-	-	-	-	-	-	-	-	-	-	-	-	-	-	-	-	-	-	-	-	-	-	-	-	-	-	-	-	-	-	-
34	ORF2_22	73521	74486	-	321	ORF2_22	Predicted ORF	-	-	-	-	-	-	-	-	-	-	-	-	-	-	-	-	-	-	-	-	-	-	-	-	-	-	-	-	-	-	-	-
35	ORF2_23	74835	76064	+	409	ORF2_23	Predicted ORF	-	-	-	-	-	-	-	-	-	-	-	-	-	-	-	-	-	-	-	-	-	-	-	-	-	-	-	-	-	-	-	-
36	ORF2_24	76177	76464	-	95	ORF2_24	Predicted ORF	-	-	-	-	-	-	-	-	-	-	-	-	-	-	-	-	-	-	-	-	-	-	-	-	-	-	-	-	-	-	-	-
37	ORF2_26	78569	79615	-	348	ORF2_26	Predicted ORF	-	-	-	-	-	-	-	-	-	-	-	-	-	-	-	-	-	-	-	-	-	-	-	-	-	-	-	-	-	-	-	-
38	ORF2_27	79736	81397	-	553	ORF2_27	Predicted ORF	-	-	-	-	-	-	-	-	-	-	-	-	-	-	-	-	-	-	-	-	-	-	-	-	-	-	-	-	-	-	-	-
39	ORF2_29	82863	83603	-	246	ORF2_29	Predicted ORF;VF|VFG1902 (gi:15791705) motA - putative flagellar motor proton channel	VFG2009	0.435	-	-	-	-	-	-	-	-	-	-	-	-	-	-	-	-	-	-	-	-	-	-	-	-	-	-	-	-	-	-
40	ORF2_30	83853	85325	+	490	ORF2_30	Predicted ORF	-	-	-	-	-	-	-	-	-	-	-	-	-	-	-	-	-	-	-	-	-	-	-	-	-	-	-	-	-	-	-	-
41	ORF2_31	85494	86408	+	304	ORF2_31	Predicted ORF	-	-	-	-	-	-	-	-	-	-	-	-	-	-	-	-	-	-	-	-	-	-	-	-	-	-	-	-	-	-	-	-
42	ORF2_32	86541	87035	-	164	ORF2_32	Predicted ORF	-	-	-	-	-	-	-	-	-	-	-	-	-	-	-	-	-	-	-	-	-	-	-	-	-	-	-	-	-	-	-	-
43	ORF2_33	87273	88727	-	484	ORF2_33	Predicted ORF	-	-	-	-	-	-	-	-	-	-	-	-	-	-	-	-	-	-	-	-	-	-	-	-	-	-	-	-	-	-	-	-
44	ORF2_34	88908	89528	+	206	ORF2_34	Predicted ORF	-	-	-	-	-	-	-	-	-	-	-	-	-	-	-	-	-	-	-	-	-	-	-	-	-	-	-	-	-	-	-	-
45	ORF2_35	89746	91110	-	454	ORF2_35	Predicted ORF	-	-	-	-	-	-	-	-	-	-	-	-	-	-	-	-	-	-	-	-	-	-	-	-	-	-	-	-	-	-	-	-
46	ORF2_36	91697	92176	+	159	ORF2_36	Predicted ORF	-	-	-	-	-	-	-	-	-	-	-	-	-	-	-	-	-	-	-	-	-	-	-	-	-	-	-	-	-	-	-	-
47	ORF2_37	92179	92865	+	228	ORF2_37	Predicted ORF	-	-	-	-	-	-	-	-	-	-	-	-	-	-	-	-	-	-	-	-	-	-	-	-	-	-	-	-	-	-	-	-
48	ORF2_38	93430	94314	+	294	ORF2_38	Predicted ORF	-	-	-	-	-	-	-	-	-	-	-	-	-	-	-	-	-	-	-	-	-	-	-	-	-	-	-	-	-	-	-	-
49	ORF2_39	94741	95577	+	278	ORF2_39	Predicted ORF	-	-	-	-	-	-	-	-	-	-	-	-	-	-	-	-	-	-	-	-	-	-	-	-	-	-	-	-	-	-	-	-
50	ORF2_41	96551	96958	+	135	ORF2_41	Predicted ORF;VF|VFG0460 (gi:16764497) csgE - curli production assembly/transport component, 2nd curli operon	VFG0460	0.444	-	-	-	-	-	-	-	-	-	-	-	-	-	-	-	-	-	-	-	-	-	-	-	-	-	-	-	-	-	-
51	ORF2_42	96969	97370	+	133	ORF2_42	Predicted ORF;VF|VFG0461 (gi:16764496) csgF - curli production assembly/transport component, 2nd curli operon	VFG0461	0.459	-	-	-	-	-	-	-	-	-	-	-	-	-	-	-	-	-	-	-	-	-	-	-	-	-	-	-	-	-	-
52	ORF2_43	97388	98221	+	277	ORF2_43	Predicted ORF;VF|VFG0462 (gi:16764495) csgG - putative transcriptional regulator in curly assembly/transport, 2nd curli operon	VFG0462	0.653	-	-	-	-	-	-	-	-	-	-	-	-	-	-	-	-	-	-	-	-	-	-	-	-	-	-	-	-	-	-
53	ORF2_47	100857	102566	+	569	ORF2_47	Predicted ORF	-	-	-	-	-	-	-	-	-	-	-	-	-	-	-	-	-	-	-	-	-	-	-	-	-	-	-	-	-	-	-	-
54	ORF2_48	103058	104026	+	322	ORF2_48	Predicted ORF	-	-	-	-	-	-	-	-	-	-	-	-	-	-	-	-	-	-	-	-	-	-	-	-	-	-	-	-	-	-	-	-
55	ORF2_49	104281	105450	-	389	ORF2_49	Predicted ORF	-	-	-	-	-	-	-	-	-	-	-	-	-	-	-	-	-	-	-	-	-	-	-	-	-	-	-	-	-	-	-	-
56	ORF2_50	105996	106652	-	218	ORF2_50	Predicted ORF;Prophage|Prophage_109521764 NC_008204 gp6 {Mycobacterium phage Qyrzula}	-	-	-	-	-	-	-	-	-	-	-	-	Prophage_34419356	0.528	-	-	-	-	-	-	-	-	-	-	-	-	-	-	-	-	-	-
57	ORF2_51	107086	108339	+	417	ORF2_51	Predicted ORF	-	-	-	-	-	-	-	-	-	-	-	-	-	-	-	-	-	-	-	-	-	-	-	-	-	-	-	-	-	-	-	-
58	ORF2_52	108345	109145	+	266	ORF2_52	Predicted ORF	-	-	-	-	-	-	-	-	-	-	-	-	-	-	-	-	-	-	-	-	-	-	-	-	-	-	-	-	-	-	-	-
59	ORF2_55	111107	111886	-	259	ORF2_55	Predicted ORF	-	-	-	-	-	-	-	-	-	-	-	-	-	-	-	-	-	-	-	-	-	-	-	-	-	-	-	-	-	-	-	-
60	ORF2_56	111871	112338	-	155	ORF2_56	Predicted ORF	-	-	-	-	-	-	-	-	-	-	-	-	-	-	-	-	-	-	-	-	-	-	-	-	-	-	-	-	-	-	-	-
61	ORF2_57	112343	112588	-	81	ORF2_57	Predicted ORF	-	-	-	-	-	-	-	-	-	-	-	-	-	-	-	-	-	-	-	-	-	-	-	-	-	-	-	-	-	-	-	-
62	ORF2_58	112585	113067	-	160	ORF2_58	Predicted ORF	-	-	-	-	-	-	-	-	-	-	-	-	-	-	-	-	-	-	-	-	-	-	-	-	-	-	-	-	-	-	-	-
63	ORF2_59	113096	113608	-	170	ORF2_59	Predicted ORF	-	-	-	-	-	-	-	-	-	-	-	-	-	-	-	-	-	-	-	-	-	-	-	-	-	-	-	-	-	-	-	-
64	ORF2_60	113817	114797	-	326	ORF2_60	Predicted ORF	-	-	-	-	-	-	-	-	-	-	-	-	-	-	-	-	-	-	-	-	-	-	-	-	-	-	-	-	-	-	-	-
65	ORF2_61	115270	116517	-	415	ORF2_61	Predicted ORF	-	-	-	-	-	-	-	-	-	-	-	-	-	-	-	-	-	-	-	-	-	-	-	-	-	-	-	-	-	-	-	-
66	ORF2_62	116963	117217	+	84	ORF2_62	Predicted ORF	-	-	-	-	-	-	-	-	-	-	-	-	-	-	-	-	-	-	-	-	-	-	-	-	-	-	-	-	-	-	-	-
67	ORF2_63	117990	119024	+	344	ORF2_63	Predicted ORF	-	-	-	-	-	-	-	-	-	-	-	-	-	-	-	-	-	-	-	-	-	-	-	-	-	-	-	-	-	-	-	-
68	ORF2_64	119225	119431	+	68	ORF2_64	Predicted ORF	-	-	-	-	-	-	-	-	-	-	-	-	-	-	-	-	-	-	-	-	-	-	-	-	-	-	-	-	-	-	-	-
69	ORF2_65	119557	120486	+	309	ORF2_65	Predicted ORF	-	-	-	-	-	-	-	-	-	-	-	-	-	-	-	-	-	-	-	-	-	-	-	-	-	-	-	-	-	-	-	-
70	ORF2_69	126241	126801	+	186	ORF2_69	Predicted ORF	-	-	-	-	-	-	-	-	-	-	-	-	-	-	-	-	-	-	-	-	-	-	-	-	-	-	-	-	-	-	-	-
71	ORF2_70	126805	129360	+	851	ORF2_70	Predicted ORF	-	-	-	-	-	-	-	-	-	-	-	-	-	-	-	-	-	-	-	-	-	-	-	-	-	-	-	-	-	-	-	-
72	ORF2_71	129361	130407	+	348	ORF2_71	Predicted ORF	-	-	-	-	-	-	-	-	-	-	-	-	-	-	-	-	-	-	-	-	-	-	-	-	-	-	-	-	-	-	-	-
73	ORF2_72	130417	131046	+	209	ORF2_72	Predicted ORF	-	-	-	-	-	-	-	-	-	-	-	-	-	-	-	-	-	-	-	-	-	-	-	-	-	-	-	-	-	-	-	-
74	ORF2_74	131800	132432	+	210	ORF2_74	Predicted ORF	-	-	-	-	-	-	-	-	-	-	-	-	-	-	-	-	-	-	-	-	-	-	-	-	-	-	-	-	-	-	-	-
75	ORF2_76	133309	134133	-	274	ORF2_76	Predicted ORF	-	-	-	-	-	-	-	-	-	-	-	-	-	-	-	-	-	-	-	-	-	-	-	-	-	-	-	-	-	-	-	-
76	ORF2_77	134396	135685	-	429	ORF2_77	Predicted ORF	-	-	-	-	-	-	-	-	-	-	-	-	-	-	-	-	-	-	-	-	-	-	-	-	-	-	-	-	-	-	-	-
77	ORF2_79	137298	137909	-	203	ORF2_79	Predicted ORF	-	-	-	-	-	-	-	-	-	-	-	-	-	-	-	-	-	-	-	-	-	-	-	-	-	-	-	-	-	-	-	-
78	ORF2_82	143342	144469	+	375	ORF2_82	Predicted ORF	-	-	-	-	-	-	-	-	-	-	-	-	-	-	-	-	-	-	-	-	-	-	-	-	-	-	-	-	-	-	-	-
79	ORF2_83	144630	145586	+	318	ORF2_83	Predicted ORF;	-	-	-	-	-	-	-	-	-	-	-	-	-	-	-	-	-	-	-	-	-	-	-	-	-	-	-	-	-	-	ARI_672940407	0.679
80	ORF2_86	149713	150474	+	253	ORF2_86	Predicted ORF	-	-	-	-	-	-	-	-	-	-	-	-	-	-	-	-	-	-	-	-	-	-	-	-	-	-	-	-	-	-	-	-
81	ORF2_87	150515	151234	+	239	ORF2_87	Predicted ORF	-	-	-	-	-	-	-	-	-	-	-	-	-	-	-	-	-	-	-	-	-	-	-	-	-	-	-	-	-	-	-	-
82	ORF2_88	151335	151553	+	72	ORF2_88	Predicted ORF	-	-	-	-	-	-	-	-	-	-	-	-	-	-	-	-	-	-	-	-	-	-	-	-	-	-	-	-	-	-	-	-
83	ORF2_90	154035	154352	-	105	ORF2_90	Predicted ORF	-	-	-	-	-	-	-	-	-	-	-	-	-	-	-	-	-	-	-	-	-	-	-	-	-	-	-	-	-	-	-	-
84	ORF2_91	154594	154821	+	75	ORF2_91	Predicted ORF;Prophage|Prophage_13095918 NC_002671 Csp {Lactococcus phage bIL312}	-	-	-	-	-	-	-	-	-	-	-	-	Prophage_13095918	0.467	-	-	-	-	-	-	-	-	-	-	-	-	-	-	PAI_AAO18076	0.507	-	-
85	ORF2_92	155161	156303	+	380	ORF2_92	Predicted ORF	-	-	-	-	-	-	-	-	-	-	-	-	-	-	-	-	-	-	-	-	-	-	-	-	-	-	-	-	-	-	-	-
86	ORF2_93	156357	157031	+	224	ORF2_93	Predicted ORF	-	-	-	-	-	-	-	-	-	-	-	-	-	-	-	-	-	-	-	-	-	-	-	-	-	-	-	-	-	-	-	-
87	ORF2_94	157192	158370	-	392	ORF2_94	Predicted ORF	-	-	-	-	-	-	-	-	-	-	-	-	-	-	-	-	-	-	-	-	-	-	-	-	-	-	-	-	-	-	-	-
88	ORF2_95	158443	159150	-	235	ORF2_95	Predicted ORF	-	-	-	-	-	-	-	-	-	-	-	-	-	-	-	-	-	-	-	-	-	-	-	-	-	-	-	-	-	-	-	-
89	ORF2_96	159647	160186	-	179	ORF2_96	Predicted ORF	-	-	-	-	-	-	-	-	-	-	-	-	-	-	-	-	-	-	-	-	-	-	-	-	-	-	-	-	-	-	-	-
90	ORF2_100	164684	165523	+	279	ORF2_100	Predicted ORF	-	-	-	-	-	-	-	-	-	-	-	-	-	-	-	-	-	-	-	-	-	-	-	-	-	-	-	-	-	-	-	-
91	ORF2_101	165589	166248	+	219	ORF2_101	Predicted ORF	-	-	-	-	-	-	-	-	-	-	-	-	-	-	-	-	-	-	-	-	-	-	-	-	-	-	-	-	-	-	-	-
92	ORF2_102	166245	166676	+	143	ORF2_102	Predicted ORF	-	-	-	-	-	-	-	-	-	-	-	-	-	-	-	-	-	-	-	-	-	-	-	-	-	-	-	-	-	-	-	-
93	ORF2_109	173758	174120	-	120	ORF2_109	Predicted ORF	-	-	-	-	-	-	-	-	-	-	-	-	-	-	-	-	-	-	-	-	-	-	-	-	-	-	-	-	-	-	-	-
94	ORF2_110	174232	175404	-	390	ORF2_110	Predicted ORF	-	-	-	-	-	-	-	-	-	-	-	-	-	-	-	-	-	-	-	-	-	-	-	-	-	-	-	-	-	-	-	-
95	ORF2_112	176506	177486	-	326	ORF2_112	Predicted ORF	-	-	-	-	-	-	-	-	-	-	-	-	-	-	-	-	-	-	-	-	-	-	-	-	-	-	-	-	-	-	-	-
96	ORF2_113	177688	180150	-	820	ORF2_113	Predicted ORF;	-	-	-	-	-	-	-	-	-	-	-	-	-	-	-	-	-	-	-	-	-	-	-	-	-	-	-	-	-	-	ARI_24461619	0.429
97	ORF2_115	180933	182645	-	570	ORF2_115	Predicted ORF	-	-	-	-	-	-	-	-	-	-	-	-	-	-	-	-	-	-	-	-	-	-	-	-	-	-	-	-	-	-	-	-
98	ORF2_118	186247	186354	-	35	ORF2_118	Predicted ORF	-	-	-	-	-	-	-	-	-	-	-	-	-	-	-	-	-	-	-	-	-	-	-	-	-	-	-	-	-	-	-	-
99	ORF2_119	186598	187848	+	416	ORF2_119	Predicted ORF	-	-	-	-	-	-	-	-	-	-	-	-	-	-	-	-	-	-	-	-	-	-	-	-	-	-	-	-	-	-	-	-
100	ORF2_121	189496	190686	+	396	ORF2_121	Predicted ORF	-	-	-	-	-	-	-	-	-	-	-	-	-	-	-	-	-	-	-	-	-	-	-	-	-	-	-	-	-	-	-	-
101	ORF2_122	191036	191788	+	250	ORF2_122	Predicted ORF	-	-	-	-	-	-	-	-	-	-	-	-	-	-	-	-	-	-	-	-	-	-	-	-	-	-	-	-	-	-	-	-
102	ORF2_125	193334	195130	+	598	ORF2_125	Predicted ORF	-	-	-	-	-	-	-	-	-	-	-	-	-	-	-	-	-	-	-	-	-	-	-	-	-	-	-	-	-	-	-	-
103	ORF2_126	195240	195800	-	186	ORF2_126	Predicted ORF	-	-	-	-	-	-	-	-	-	-	-	-	-	-	-	-	-	-	-	-	-	-	-	-	-	-	-	-	-	-	-	-
104	ORF2_127	196385	198013	-	542	ORF2_127	Predicted ORF	-	-	-	-	-	-	-	-	-	-	-	-	-	-	-	-	-	-	-	-	-	-	-	-	-	-	-	-	-	-	-	-
105	ORF2_128	198240	202706	-	1488	ORF2_128	Predicted ORF	-	-	-	-	-	-	-	-	-	-	-	-	-	-	-	-	-	-	-	-	-	-	-	-	-	-	-	-	-	-	-	-
106	ORF2_129	202713	203417	-	234	ORF2_129	Predicted ORF	-	-	-	-	-	-	-	-	-	-	-	-	-	-	-	-	-	-	-	-	-	-	-	-	-	-	-	-	-	-	-	-
107	ORF2_130	203398	204720	-	440	ORF2_130	Predicted ORF	-	-	-	-	-	-	-	-	-	-	-	-	-	-	-	-	-	-	-	-	-	-	-	-	-	-	-	-	-	-	-	-
108	ORF2_131	204731	205534	-	267	ORF2_131	Predicted ORF	-	-	-	-	-	-	-	-	-	-	-	-	-	-	-	-	-	-	-	-	-	-	-	-	-	-	-	-	-	-	-	-
109	ORF2_133	207301	208182	-	293	ORF2_133	Predicted ORF	-	-	-	-	-	-	-	-	-	-	-	-	-	-	-	-	-	-	-	-	-	-	-	-	-	-	-	-	-	-	-	-
110	ORF2_134	208763	209563	+	266	ORF2_134	Predicted ORF	-	-	-	-	-	-	-	-	-	-	-	-	-	-	-	-	-	-	-	-	-	-	-	-	-	-	-	-	-	-	-	-
111	ORF2_135	209594	210484	-	296	ORF2_135	Predicted ORF	-	-	-	-	-	-	-	-	-	-	-	-	-	-	-	-	-	-	-	-	-	-	-	-	-	-	-	-	-	-	-	-
112	ORF2_136	210622	211374	-	250	ORF2_136	Predicted ORF;PAI|PAI_ABP49101 putative CMP-2-keto-3-deoxyoctulosonic acid synthetase	-	-	-	-	-	-	-	-	-	-	-	-	-	-	-	-	-	-	-	-	-	-	-	-	-	-	-	-	PAI_CAE85213	0.468	-	-
113	ORF2_137	211371	211553	-	60	ORF2_137	Predicted ORF	-	-	-	-	-	-	-	-	-	-	-	-	-	-	-	-	-	-	-	-	-	-	-	-	-	-	-	-	-	-	-	-
114	ORF2_138	211565	212569	-	334	ORF2_138	Predicted ORF	-	-	-	-	-	-	-	-	-	-	-	-	-	-	-	-	-	-	-	-	-	-	-	-	-	-	-	-	-	-	-	-
115	ORF2_141	216803	217324	+	173	ORF2_141	Predicted ORF	-	-	-	-	-	-	-	-	-	-	-	-	-	-	-	-	-	-	-	-	-	-	-	-	-	-	-	-	-	-	-	-
116	ORF2_142	217527	217700	-	57	ORF2_142	Predicted ORF	-	-	-	-	-	-	-	-	-	-	-	-	-	-	-	-	-	-	-	-	-	-	-	-	-	-	-	-	-	-	-	-
117	ORF2_144	219855	220091	-	78	ORF2_144	Predicted ORF	-	-	-	-	-	-	-	-	-	-	-	-	-	-	-	-	-	-	-	-	-	-	-	-	-	-	-	-	-	-	-	-
118	ORF2_145	220157	222286	-	709	ORF2_145	Predicted ORF	-	-	-	-	-	-	-	-	-	-	-	-	-	-	-	-	-	-	-	-	-	-	-	-	-	-	-	-	-	-	-	-
119	ORF2_146	222519	223529	-	336	ORF2_146	Predicted ORF	-	-	-	-	-	-	-	-	-	-	-	-	-	-	-	-	-	-	-	-	-	-	-	-	-	-	-	-	-	-	-	-
120	ORF2_147	224286	225608	+	440	ORF2_147	Predicted ORF;VF|VFG1671 (gi:28316251) orf48 - putative lysin/cadaverin transporter	VFG1671	0.643	-	-	-	-	-	-	-	-	-	-	-	-	-	-	-	-	-	-	-	-	-	-	-	-	-	-	PAI_CAD66196	0.643	-	-
121	ORF2_148	225679	227814	+	711	ORF2_148	Predicted ORF;VF|VFG1670 (gi:28316250) orf47 - putative cadaverin decarboxylase	VFG1670	0.631	-	-	-	-	-	-	-	-	-	-	-	-	-	-	-	-	-	-	-	-	-	-	-	-	-	-	PAI_CAD66195	0.631	-	-
122	ORF2_150	228620	230911	-	763	ORF2_150	Predicted ORF	-	-	-	-	-	-	-	-	-	-	-	-	-	-	-	-	-	-	-	-	-	-	-	-	-	-	-	-	-	-	-	-
123	ORF2_152	232168	233034	-	288	ORF2_152	Predicted ORF	-	-	-	-	-	-	-	-	-	-	-	-	-	-	-	-	-	-	-	-	-	-	-	-	-	-	-	-	-	-	-	-
124	ORF2_153	233287	234345	-	352	ORF2_153	Predicted ORF;VF|VFG1630 (gi:14594865) orf7 - hypothetical protein	VFG1630	0.429	-	-	-	-	-	-	-	-	-	-	-	-	-	-	-	-	-	-	-	-	-	-	-	-	-	-	PAI_CAC43413	0.429	-	-
125	ORF2_154	234753	234887	-	44	ORF2_154	Predicted ORF	-	-	-	-	-	-	-	-	-	-	-	-	-	-	-	-	-	-	-	-	-	-	-	-	-	-	-	-	-	-	-	-
126	ORF2_155	235279	236538	+	419	ORF2_155	Predicted ORF	-	-	-	-	-	-	-	-	-	-	-	-	-	-	-	-	-	-	-	-	-	-	-	-	-	-	-	-	-	-	-	-
127	ORF2_156	236623	236742	-	39	ORF2_156	Predicted ORF	-	-	-	-	-	-	-	-	-	-	-	-	-	-	-	-	-	-	-	-	-	-	-	-	-	-	-	-	-	-	-	-
128	ORF2_158	237945	238520	-	191	ORF2_158	Predicted ORF	-	-	-	-	-	-	-	-	-	-	-	-	-	-	-	-	-	-	-	-	-	-	-	-	-	-	-	-	-	-	-	-
129	ORF2_160	240225	240740	+	171	ORF2_160	Predicted ORF	-	-	-	-	-	-	-	-	-	-	-	-	-	-	-	-	-	-	-	-	-	-	-	-	-	-	-	-	-	-	-	-
130	ORF2_161	240740	242533	+	597	ORF2_161	Predicted ORF	-	-	-	-	-	-	-	-	-	-	-	-	-	-	-	-	-	-	-	-	-	-	-	-	-	-	-	-	-	-	-	-
131	ORF2_162	242622	243263	+	213	ORF2_162	Predicted ORF	-	-	-	-	-	-	-	-	-	-	-	-	-	-	-	-	-	-	-	-	-	-	-	-	-	-	-	-	-	-	-	-
132	ORF2_164	244975	245304	+	109	ORF2_164	Predicted ORF	-	-	-	-	-	-	-	-	-	-	-	-	-	-	-	-	-	-	-	-	-	-	-	-	-	-	-	-	-	-	-	-
133	ORF2_165	245708	246664	-	318	ORF2_165	Predicted ORF	-	-	-	-	-	-	-	-	-	-	-	-	-	-	-	-	-	-	-	-	-	-	-	-	-	-	-	-	-	-	-	-
134	ORF2_167	249116	250732	-	538	ORF2_167	Predicted ORF	-	-	-	-	-	-	-	-	-	-	-	-	-	-	-	-	-	-	-	-	-	-	-	-	-	-	-	-	-	-	-	-
135	ORF2_168	251002	251325	+	107	ORF2_168	Predicted ORF	-	-	-	-	-	-	-	-	-	-	-	-	-	-	-	-	-	-	-	-	-	-	-	-	-	-	-	-	-	-	-	-
136	ORF2_170	252357	252557	+	66	ORF2_170	Predicted ORF	-	-	-	-	-	-	-	-	-	-	-	-	-	-	-	-	-	-	-	-	-	-	-	-	-	-	-	-	-	-	-	-
137	ORF2_171	252972	253112	+	46	ORF2_171	Predicted ORF	-	-	-	-	-	-	-	-	-	-	-	-	-	-	-	-	-	-	-	-	-	-	-	-	-	-	-	-	-	-	-	-
138	ORF2_172	253113	253505	-	130	ORF2_172	Predicted ORF	-	-	-	-	-	-	-	-	-	-	-	-	-	-	-	-	-	-	-	-	-	-	-	-	-	-	-	-	-	-	-	-
139	ORF2_173	253917	254795	-	292	ORF2_173	Predicted ORF	-	-	-	-	-	-	-	-	-	-	-	-	-	-	-	-	-	-	-	-	-	-	-	-	-	-	-	-	-	-	-	-
140	ORF2_175	257904	258770	+	288	ORF2_175	Predicted ORF	-	-	-	-	-	-	-	-	-	-	-	-	-	-	-	-	-	-	-	-	-	-	-	-	-	-	-	-	-	-	-	-
141	ORF2_176	258709	261840	+	1043	ORF2_176	Predicted ORF	-	-	-	-	-	-	-	-	-	-	-	-	-	-	-	-	-	-	-	-	-	-	-	-	-	-	-	-	-	-	-	-
142	ORF2_177	261767	262816	-	349	ORF2_177	Predicted ORF	-	-	-	-	-	-	-	-	-	-	-	-	-	-	-	-	-	-	-	-	-	-	-	-	-	-	-	-	-	-	-	-
143	ORF2_180	266553	267047	-	164	ORF2_180	Predicted ORF	-	-	-	-	-	-	-	-	-	-	-	-	-	-	-	-	-	-	-	-	-	-	-	-	-	-	-	-	-	-	-	-
144	ORF2_181	267085	267582	-	165	ORF2_181	Predicted ORF	-	-	-	-	-	-	-	-	-	-	-	-	-	-	-	-	-	-	-	-	-	-	-	-	-	-	-	-	-	-	-	-
145	ORF2_182	267579	268304	-	241	ORF2_182	Predicted ORF	-	-	-	-	-	-	-	-	-	-	-	-	-	-	-	-	-	-	-	-	-	-	-	-	-	-	-	-	-	-	-	-
146	ORF2_183	268306	270363	-	685	ORF2_183	Predicted ORF;	-	-	-	-	-	-	-	-	T6SE_ABG57133	0.743	-	-	-	-	-	-	-	-	-	-	-	-	-	-	-	-	-	-	PAI_ABG57133	0.743	-	-
147	ORF2_184	270490	271008	-	172	ORF2_184	Predicted ORF;T6SE|T6SE_ECA2866	-	-	-	-	-	-	-	-	T6SE_ABG57132	0.953	-	-	-	-	-	-	-	-	-	-	-	-	-	-	-	-	-	-	PAI_ABG57132	0.953	-	-
148	ORF2_186	272772	274460	+	562	ORF2_186	Predicted ORF	-	-	-	-	-	-	-	-	-	-	-	-	-	-	-	-	-	-	-	-	-	-	-	-	-	-	-	-	-	-	-	-
149	ORF2_187	274501	275145	-	214	ORF2_187	Predicted ORF;PAI|PAI_AAZ04440 conserved hypothetical protein	VFG1505	0.463	-	-	-	-	-	-	-	-	-	-	-	-	-	-	-	-	-	-	-	-	-	-	-	-	-	-	PAI_CAD33764	0.463	-	-
150	ORF2_188	275146	276360	-	404	ORF2_188	Predicted ORF;PAI|PAI_AAZ04441 conserved hypothetical protein	VFG1504	0.605	-	-	-	-	-	-	-	-	-	-	-	-	-	-	-	-	-	-	-	-	-	-	-	-	-	-	PAI_CAD33763	0.605	-	-
151	ORF2_189	276795	277541	-	248	ORF2_189	Predicted ORF	-	-	-	-	-	-	-	-	-	-	-	-	-	-	-	-	-	-	-	-	-	-	-	-	-	-	-	-	-	-	-	-
152	ORF2_193	288105	288359	-	84	ORF2_193	Predicted ORF	-	-	-	-	-	-	-	-	-	-	-	-	-	-	-	-	-	-	-	-	-	-	-	-	-	-	-	-	-	-	-	-
153	ORF2_195	290108	290344	-	78	ORF2_195	Predicted ORF;Prophage|Prophage_32170880 NC_004913 hypothetical protein {Stx1 converting phage}	-	-	-	-	-	-	-	-	-	-	-	-	Prophage_116222025	0.446	-	-	-	-	-	-	-	-	-	-	-	-	-	-	-	-	-	-
154	ORF2_196	290344	290724	-	126	ORF2_196	Predicted ORF;Prophage|Prophage_32170879 NC_004913 hypothetical protein {Stx1 converting phage}	-	-	-	-	-	-	-	-	-	-	-	-	Prophage_116222024	0.452	-	-	-	-	-	-	-	-	-	-	-	-	-	-	-	-	-	-
155	ORF2_199	291757	291978	-	73	ORF2_199	Predicted ORF	-	-	-	-	-	-	-	-	-	-	-	-	-	-	-	-	-	-	-	-	-	-	-	-	-	-	-	-	-	-	-	-
156	ORF3_1	296433	296594	+	53	ORF3_1	Predicted ORF	-	-	-	-	-	-	-	-	-	-	-	-	-	-	-	-	-	-	-	-	-	-	-	-	-	-	-	-	-	-	-	-
157	ORF4_4	299541	299858	+	105	ORF4_4	Predicted ORF	-	-	-	-	-	-	-	-	-	-	-	-	-	-	-	-	-	-	-	-	-	-	-	-	-	-	-	-	-	-	-	-
158	ORF4_5	299914	300333	+	139	ORF4_5	Predicted ORF	-	-	-	-	-	-	-	-	-	-	-	-	-	-	-	-	-	-	-	-	-	-	-	-	-	-	-	-	-	-	-	-
159	ORF4_6	300489	300944	-	151	ORF4_6	Predicted ORF	-	-	-	-	-	-	-	-	-	-	-	-	-	-	-	-	-	-	-	-	-	-	-	-	-	-	-	-	-	-	-	-
160	ORF4_7	301047	301850	-	267	ORF4_7	Predicted ORF	-	-	-	-	-	-	-	-	-	-	-	-	-	-	-	-	-	-	-	-	-	-	-	-	-	-	-	-	-	-	-	-
161	ORF4_8	301854	303029	+	391	ORF4_8	Predicted ORF	-	-	-	-	-	-	-	-	-	-	-	-	-	-	-	-	-	-	-	-	-	-	-	-	-	-	-	-	-	-	-	-
162	ORF4_9	304399	304875	+	158	ORF4_9	Predicted ORF	-	-	-	-	-	-	-	-	-	-	-	-	-	-	-	-	-	-	-	-	-	-	-	-	-	-	-	-	-	-	-	-
163	ORF4_10	306126	306410	-	94	ORF4_10	Predicted ORF	-	-	-	-	-	-	-	-	-	-	-	-	-	-	-	-	-	-	-	-	-	-	-	-	-	-	-	-	-	-	-	-
164	ORF4_11	306410	307327	-	305	ORF4_11	Predicted ORF	-	-	-	-	-	-	-	-	-	-	-	-	-	-	-	-	-	-	-	-	-	-	-	-	-	-	-	-	-	-	-	-
165	ORF4_12	307327	307950	-	207	ORF4_12	Predicted ORF	-	-	-	-	-	-	-	-	-	-	-	-	-	-	-	-	-	-	-	-	-	-	-	-	-	-	-	-	-	-	-	-
166	ORF4_13	307941	308555	-	204	ORF4_13	Predicted ORF	-	-	-	-	-	-	-	-	-	-	-	-	-	-	-	-	-	-	-	-	-	-	-	-	-	-	-	-	-	-	-	-
167	ORF4_14	308590	309726	-	378	ORF4_14	Predicted ORF	-	-	-	-	-	-	-	-	-	-	-	-	-	-	-	-	-	-	-	-	-	-	-	-	-	-	-	-	-	-	-	-
168	ORF4_15	309746	310261	-	171	ORF4_15	Predicted ORF	-	-	-	-	-	-	-	-	-	-	-	-	-	-	-	-	-	-	-	-	-	-	-	-	-	-	-	-	-	-	-	-
169	ORF4_16	310258	311784	-	508	ORF4_16	Predicted ORF	-	-	-	-	-	-	-	-	-	-	-	-	-	-	-	-	-	-	-	-	-	-	-	-	-	-	-	-	-	-	-	-
170	ORF4_17	311799	314522	-	907	ORF4_17	Predicted ORF	-	-	-	-	-	-	-	-	-	-	-	-	-	-	-	-	-	-	-	-	-	-	-	-	-	-	-	-	-	-	-	-
171	ORF4_18	314996	315769	+	257	ORF4_18	Predicted ORF	-	-	-	-	-	-	-	-	-	-	-	-	-	-	-	-	-	-	-	-	-	-	-	-	-	-	-	-	-	-	-	-
172	ORF4_19	315798	316400	+	200	ORF4_19	Predicted ORF	-	-	-	-	-	-	-	-	-	-	-	-	-	-	-	-	-	-	-	-	-	-	-	-	-	-	-	-	-	-	-	-
173	ORF4_20	316609	316785	-	58	ORF4_20	Predicted ORF	-	-	-	-	-	-	-	-	-	-	-	-	-	-	-	-	-	-	-	-	-	-	-	-	-	-	-	-	-	-	-	-
174	ORF4_21	317107	317739	-	210	ORF4_21	Predicted ORF	-	-	-	-	-	-	-	-	-	-	-	-	-	-	-	-	-	-	-	-	-	-	-	-	-	-	-	-	-	-	-	-
175	ORF4_27	324056	325459	+	467	ORF4_27	Predicted ORF	-	-	-	-	-	-	-	-	-	-	-	-	-	-	-	-	-	-	-	-	-	-	-	-	-	-	-	-	-	-	-	-
176	ORF4_31	328655	329038	-	127	ORF4_31	Predicted ORF	-	-	-	-	-	-	-	-	-	-	-	-	-	-	-	-	-	-	-	-	-	-	-	-	-	-	-	-	-	-	-	-
177	ORF4_32	329367	330728	+	453	ORF4_32	Predicted ORF;VF|VFG1050 (gi:15808730) orf34 - unknown	VFG1050	0.616	-	-	-	-	-	-	-	-	-	-	-	-	-	-	-	-	-	-	-	-	-	-	-	-	-	-	PAI_AAL08459	0.616	ARI_15808730	0.616
178	ORF4_33	330996	331574	+	192	ORF4_33	Predicted ORF	-	-	-	-	-	-	-	-	-	-	-	-	-	-	-	-	-	-	-	-	-	-	-	-	-	-	-	-	-	-	-	-
179	ORF4_36	335233	335754	+	173	ORF4_36	Predicted ORF	-	-	-	-	-	-	-	-	-	-	-	-	-	-	-	-	-	-	-	-	-	-	-	-	-	-	-	-	-	-	-	-
180	ORF4_37	335864	336178	-	104	ORF4_37	Predicted ORF	-	-	-	-	-	-	-	-	-	-	-	-	-	-	-	-	-	-	-	-	-	-	-	-	-	-	-	-	-	-	-	-
181	ORF4_38	336331	336828	-	165	ORF4_38	Predicted ORF	-	-	-	-	-	-	-	-	-	-	-	-	-	-	-	-	-	-	-	-	-	-	-	-	-	-	-	-	-	-	-	-
182	ORF4_40	338405	339370	+	321	ORF4_40	Predicted ORF	-	-	-	-	-	-	-	-	-	-	-	-	-	-	-	-	-	-	-	-	-	-	-	-	-	-	-	-	-	-	-	-
183	ORF4_43	343951	345477	-	508	ORF4_43	Predicted ORF	-	-	-	-	-	-	-	-	-	-	-	-	-	-	-	-	-	-	-	-	-	-	-	-	-	-	-	-	-	-	-	-
184	ORF4_44	345579	345923	+	114	ORF4_44	Predicted ORF	-	-	-	-	-	-	-	-	-	-	-	-	-	-	-	-	-	-	-	-	-	-	-	-	-	-	-	-	-	-	-	-
185	ORF4_45	345964	348114	-	716	ORF4_45	Predicted ORF	-	-	-	-	-	-	-	-	-	-	-	-	-	-	-	-	-	-	-	-	-	-	-	-	-	-	-	-	-	-	-	-
186	ORF4_46	348246	349091	-	281	ORF4_46	Predicted ORF	-	-	-	-	-	-	-	-	-	-	-	-	-	-	-	-	-	-	-	-	-	-	-	-	-	-	-	-	-	-	-	-
187	ORF4_47	349138	349350	-	70	ORF4_47	Predicted ORF	-	-	-	-	-	-	-	-	-	-	-	-	-	-	-	-	-	-	-	-	-	-	-	-	-	-	-	-	-	-	-	-
188	ORF4_49	351099	352118	-	339	ORF4_49	Predicted ORF;PAI|PAI_CAA21362 -	-	-	-	-	-	-	-	-	-	-	-	-	-	-	-	-	-	-	-	-	-	-	-	-	-	-	-	-	PAI_CAA21362	0.832	-	-
189	ORF4_53	362429	363853	-	474	ORF4_53	Predicted ORF	-	-	-	-	-	-	-	-	-	-	-	-	-	-	-	-	-	-	-	-	-	-	-	-	-	-	-	-	-	-	-	-
190	ORF4_56	366450	367625	-	391	ORF4_56	Predicted ORF;VF|VFG0176 (gi:15598293) xcpX - general secretion pathway protein K	VFG2054	0.427	-	-	-	-	-	-	-	-	-	-	-	-	-	-	-	-	-	-	-	-	-	-	-	-	-	-	PAI_CAE85227	0.432	-	-
191	ORF4_57	367622	368299	-	225	ORF4_57	Predicted ORF;VF|VFG0177 (gi:15598294) xcpW - general secretion pathway protein J	VFG2053	0.453	-	-	-	-	-	-	-	-	-	-	-	-	-	-	-	-	-	-	-	-	-	-	-	-	-	-	PAI_CAE85228	0.449	-	-
192	ORF4_60	369340	369798	-	152	ORF4_60	Predicted ORF;VF|VFG0180 (gi:15598297) xcpT - general secretion pathway protein G	VFG2050	0.691	-	-	-	-	-	-	-	-	-	-	-	-	-	-	-	-	-	-	-	-	-	-	-	-	-	-	PAI_CAE85231	0.697	-	-
193	ORF4_61	369847	371121	-	424	ORF4_61	Predicted ORF;VF|VFG0181 (gi:15598298) xcpS - general secretion pathway protein F	VFG2049	0.66	-	-	-	-	-	-	-	-	-	-	-	-	-	-	-	-	-	-	-	-	-	-	-	-	-	-	PAI_CAE85232	0.677	-	-
194	ORF4_62	371127	372716	-	529	ORF4_62	Predicted ORF;VF|VFG0182 (gi:15598299) xcpR - general secretion pathway protein E	VFG2048	0.705	-	-	-	-	-	-	-	-	-	-	-	-	-	-	-	-	-	-	-	-	-	-	-	-	-	-	PAI_CAE85233	0.711	-	-
195	ORF4_63	372709	374790	-	693	ORF4_63	Predicted ORF;VF|VFG0184 (gi:15598301) xcpQ - general secretion pathway protein D	VFG2047	0.727	-	-	-	-	-	-	-	-	-	-	-	-	-	-	-	-	-	-	-	-	-	-	-	-	-	-	PAI_CAE85234	0.736	-	-
196	ORF4_67	378176	378469	+	97	ORF4_67	Predicted ORF	-	-	-	-	-	-	-	-	-	-	-	-	-	-	-	-	-	-	-	-	-	-	-	-	-	-	-	-	-	-	-	-
197	ORF4_68	378466	379119	+	217	ORF4_68	Predicted ORF	-	-	-	-	-	-	-	-	-	-	-	-	-	-	-	-	-	-	-	-	-	-	-	-	-	-	-	-	-	-	-	-
198	ORF4_69	379212	379481	-	89	ORF4_69	Predicted ORF	-	-	-	-	-	-	-	-	-	-	-	-	-	-	-	-	-	-	-	-	-	-	-	-	-	-	-	-	-	-	-	-
199	ORF4_71	380741	381457	-	238	ORF4_71	Predicted ORF	-	-	-	-	-	-	-	-	-	-	-	-	-	-	-	-	-	-	-	-	-	-	-	-	-	-	-	-	-	-	-	-
200	ORF4_73	382545	382976	-	143	ORF4_73	Predicted ORF	-	-	-	-	-	-	-	-	-	-	-	-	-	-	-	-	-	-	-	-	-	-	-	-	-	-	-	-	-	-	-	-
201	ORF4_74	382970	384445	-	491	ORF4_74	Predicted ORF	-	-	-	-	-	-	-	-	-	-	-	-	-	-	-	-	-	-	-	-	-	-	-	-	-	-	-	-	-	-	-	-
202	ORF4_75	384520	386295	-	591	ORF4_75	Predicted ORF	-	-	-	-	-	-	-	-	-	-	-	-	-	-	-	-	-	-	-	-	-	-	-	-	-	-	-	-	-	-	-	-
203	ORF4_77	388917	389564	+	215	ORF4_77	Predicted ORF	-	-	-	-	-	-	-	-	-	-	-	-	-	-	-	-	-	-	-	-	-	-	-	-	-	-	-	-	-	-	-	-
204	ORF4_78	389659	391125	-	488	ORF4_78	Predicted ORF;VF|VFG0594 (gi:16764452) pipD - Pathogenicity island encoded protein: SPI3	VFG0594	0.684	-	-	-	-	-	-	-	-	-	-	-	-	-	-	-	-	-	-	-	-	-	-	-	-	-	-	-	-	-	-
205	ORF4_79	391350	391724	-	124	ORF4_79	Predicted ORF	-	-	-	-	-	-	-	-	-	-	-	-	-	-	-	-	-	-	-	-	-	-	-	-	-	-	-	-	-	-	-	-
206	ORF4_80	392327	392458	-	43	ORF4_80	Predicted ORF	-	-	-	-	-	-	-	-	-	-	-	-	-	-	-	-	-	-	-	-	-	-	-	-	-	-	-	-	-	-	-	-
207	ORF4_81	392508	393218	-	236	ORF4_81	Predicted ORF	-	-	-	-	-	-	-	-	-	-	-	-	-	-	-	-	-	-	-	-	-	-	-	-	-	-	-	-	-	-	-	-
208	ORF4_84	395885	397915	-	676	ORF4_84	Predicted ORF;PAI|PAI_ABG57133 VgrG-2 protein	-	-	-	-	-	-	-	-	T6SE_ABG57151	0.711	-	-	-	-	-	-	-	-	-	-	-	-	-	-	-	-	-	-	PAI_ABG57151	0.711	-	-
209	ORF4_85	397943	398230	-	95	ORF4_85	Predicted ORF;PAI|PAI_ABG57150 hypothetical protein	-	-	-	-	-	-	-	-	-	-	-	-	-	-	-	-	-	-	-	-	-	-	-	-	-	-	-	-	PAI_ABG57150	0.884	-	-
210	ORF4_86	398271	399683	-	470	ORF4_86	Predicted ORF;PAI|PAI_AAN64195 Orf3	-	-	-	-	-	-	-	-	-	-	-	-	-	-	-	-	-	-	-	-	T6SS_50122354_TssA	0.616	-	-	-	-	-	-	PAI_ABG57149	0.7	-	-
211	ORF4_87	399730	403227	-	1165	ORF4_87	Predicted ORF;PAI|PAI_AAN64194 Pmt1	-	-	-	-	-	-	-	-	-	-	-	-	-	-	-	-	-	-	-	-	T6SS_50122355_TssM	0.682	-	-	-	-	-	-	PAI_ABG57148	0.735	-	-
212	ORF4_88	403253	404674	-	473	ORF4_88	Predicted ORF;PAI|PAI_AET37195 EvfF	-	-	-	-	-	-	-	-	-	-	-	-	-	-	-	-	-	-	-	-	T6SS_50122356_TssA	0.588	-	-	-	-	-	-	PAI_ABG57147	0.579	-	-
213	ORF4_91	406832	409438	-	868	ORF4_91	Predicted ORF;	-	-	-	-	-	-	-	-	-	-	-	-	-	-	-	-	-	-	-	-	T6SS_50122359_TssH	0.787	-	-	-	-	-	-	PAI_ABG57144	0.817	-	-
214	ORF4_92	409456	410232	-	258	ORF4_92	Predicted ORF;PAI|PAI_AET37200 EvfK	-	-	-	-	-	-	-	-	-	-	-	-	-	-	-	-	-	-	-	-	T6SS_50122360_TssL	0.733	-	-	-	-	-	-	PAI_ABG57143	0.74	-	-
215	ORF4_93	410241	411581	-	446	ORF4_93	Predicted ORF;VF|VFG2082 (gi:15600885) VCA0114 - hypothetical protein	VFG2082	0.617	-	-	-	-	-	-	-	-	-	-	-	-	-	-	-	-	-	-	T6SS_50122361_TssK	0.87	-	-	-	-	-	-	PAI_ABG57142	0.906	-	-
216	ORF4_94	411584	412099	-	171	ORF4_94	Predicted ORF;	-	-	-	-	-	-	-	-	-	-	-	-	-	-	-	-	-	-	-	-	T6SS_50122362_TssJ	0.731	-	-	-	-	-	-	PAI_ABG57141	0.83	-	-
217	ORF4_96	413343	414341	-	332	ORF4_96	Predicted ORF;	-	-	-	-	-	-	-	-	-	-	-	-	-	-	-	-	-	-	-	-	T6SS_50122364_TssG	0.771	-	-	-	-	-	-	PAI_ABG57139	0.792	-	-
218	ORF4_97	414305	416077	-	590	ORF4_97	Predicted ORF;VF|VFG2078 (gi:15600881) vasA - hypothetical protein	VFG2078	0.536	-	-	-	-	-	-	-	-	-	-	-	-	-	-	-	-	-	-	T6SS_50122365_TssF	0.841	-	-	-	-	-	-	PAI_ABG57138	0.837	-	-
219	ORF4_98	416084	416515	-	143	ORF4_98	Predicted ORF;	-	-	-	-	-	-	-	-	-	-	-	-	-	-	-	-	-	-	-	-	T6SS_50122366_TssE	0.769	-	-	-	-	-	-	PAI_ABG57137	0.783	-	-
220	ORF4_99	416521	417999	-	492	ORF4_99	Predicted ORF;	-	-	-	-	-	-	-	-	-	-	-	-	-	-	-	-	-	-	-	-	T6SS_50122367_TssC	0.929	-	-	-	-	-	-	-	-	-	-
221	ORF4_100	418029	418511	-	160	ORF4_100	Predicted ORF;	-	-	-	-	-	-	-	-	-	-	-	-	-	-	-	-	-	-	-	-	T6SS_50122368_TssB	0.825	-	-	-	-	-	-	-	-	-	-
222	ORF4_102	421860	422831	-	323	ORF4_102	Predicted ORF	-	-	-	-	-	-	-	-	-	-	-	-	-	-	-	-	-	-	-	-	-	-	-	-	-	-	-	-	-	-	-	-
223	ORF4_104	425698	427887	-	729	ORF4_104	Predicted ORF	-	-	-	-	-	-	-	-	-	-	-	-	-	-	-	-	-	-	-	-	-	-	-	-	-	-	-	-	-	-	-	-
224	ORF4_105	428307	430784	-	825	ORF4_105	Predicted ORF	-	-	-	-	-	-	-	-	-	-	-	-	-	-	-	-	-	-	-	-	-	-	-	-	-	-	-	-	-	-	-	-
225	ORF4_106	431014	431916	-	300	ORF4_106	Predicted ORF	-	-	-	-	-	-	-	-	-	-	-	-	-	-	-	-	-	-	-	-	-	-	-	-	-	-	-	-	-	-	-	-
226	ORF4_107	432156	432245	-	29	ORF4_107	Predicted ORF	-	-	-	-	-	-	-	-	-	-	-	-	-	-	-	-	-	-	-	-	-	-	-	-	-	-	-	-	-	-	-	-
227	ORF4_108	432468	432809	+	113	ORF4_108	Predicted ORF	-	-	-	-	-	-	-	-	-	-	-	-	-	-	-	-	-	-	-	-	-	-	-	-	-	-	-	-	-	-	-	-
228	ORF4_110	434221	434877	+	218	ORF4_110	Predicted ORF	-	-	-	-	-	-	-	-	-	-	-	-	-	-	-	-	-	-	-	-	-	-	-	-	-	-	-	-	-	-	-	-
229	ORF4_111	434922	435332	-	136	ORF4_111	Predicted ORF	-	-	-	-	-	-	-	-	-	-	-	-	-	-	-	-	-	-	-	-	-	-	-	-	-	-	-	-	-	-	-	-
230	ORF4_112	435553	438084	+	843	ORF4_112	Predicted ORF	-	-	-	-	-	-	-	-	-	-	-	-	-	-	-	-	-	-	-	-	-	-	-	-	-	-	-	-	-	-	-	-
231	ORF4_113	438243	439958	-	571	ORF4_113	Predicted ORF	-	-	-	-	-	-	-	-	-	-	-	-	-	-	-	-	-	-	-	-	-	-	-	-	-	-	-	-	-	-	-	-
232	ORF4_114	440983	443118	+	711	ORF4_114	Predicted ORF;VF|VFG1670 (gi:28316250) orf47 - putative cadaverin decarboxylase	VFG1670	0.655	-	-	-	-	-	-	-	-	-	-	-	-	-	-	-	-	-	-	-	-	-	-	-	-	-	-	PAI_CAD66195	0.655	-	-
233	ORF4_115	444339	445748	-	469	ORF4_115	Predicted ORF	-	-	-	-	-	-	-	-	-	-	-	-	-	-	-	-	-	-	-	-	-	-	-	-	-	-	-	-	-	-	-	-
234	ORF5_1	446945	447319	+	124	ORF5_1	Predicted ORF	-	-	-	-	-	-	-	-	-	-	-	-	-	-	-	-	-	-	-	-	-	-	-	-	-	-	-	-	-	-	-	-
235	ORF5_2	447467	447916	-	149	ORF5_2	Predicted ORF	-	-	-	-	-	-	-	-	-	-	-	-	-	-	-	-	-	-	-	-	-	-	-	-	-	-	-	-	-	-	-	-
236	ORF5_3	447967	448356	-	129	ORF5_3	Predicted ORF	-	-	-	-	-	-	-	-	-	-	-	-	-	-	-	-	-	-	-	-	-	-	-	-	-	-	-	-	-	-	-	-
237	ORF5_5	450363	451793	-	476	ORF5_5	Predicted ORF	-	-	-	-	-	-	-	-	-	-	-	-	-	-	-	-	-	-	-	-	-	-	-	-	-	-	-	-	-	-	-	-
238	ORF5_8	454805	455881	+	358	ORF5_8	Predicted ORF;VF|VFG1630 (gi:14594865) orf7 - hypothetical protein	VFG1630	0.43	-	-	-	-	-	-	-	-	-	-	-	-	-	-	-	-	-	-	-	-	-	-	-	-	-	-	PAI_CAC43413	0.43	-	-
239	ORF5_9	455903	457033	+	376	ORF5_9	Predicted ORF	-	-	-	-	-	-	-	-	-	-	-	-	-	-	-	-	-	-	-	-	-	-	-	-	-	-	-	-	-	-	-	-
240	ORF5_10	457153	459186	-	677	ORF5_10	Predicted ORF	-	-	-	-	-	-	-	-	-	-	-	-	-	-	-	-	-	-	-	-	-	-	-	-	-	-	-	-	-	-	-	-
241	ORF5_11	459589	459972	-	127	ORF5_11	Predicted ORF	-	-	-	-	-	-	-	-	-	-	-	-	-	-	-	-	-	-	-	-	-	-	-	-	-	-	-	-	-	-	-	-
242	ORF5_12	460556	461293	-	245	ORF5_12	Predicted ORF	-	-	-	-	-	-	-	-	-	-	-	-	-	-	-	-	-	-	-	-	-	-	-	-	-	-	-	-	-	-	-	-
243	ORF5_13	461439	462416	+	325	ORF5_13	Predicted ORF	-	-	-	-	-	-	-	-	-	-	-	-	-	-	-	-	-	-	-	-	-	-	-	-	-	-	-	-	-	-	-	-
244	ORF5_15	463432	463794	-	120	ORF5_15	Predicted ORF	-	-	-	-	-	-	-	-	-	-	-	-	-	-	-	-	-	-	-	-	-	-	-	-	-	-	-	-	-	-	-	-
245	ORF5_16	464164	466737	+	857	ORF5_16	Predicted ORF;VF|VFG0080 (gi:16803037) clpE - ATP-dependent protease	VFG0079	0.473	-	-	-	-	-	-	-	-	-	-	-	-	-	-	-	-	-	-	T6SS_108761289_TssH	0.478	-	-	-	-	-	-	-	-	-	-
246	ORF5_17	466945	467394	+	149	ORF5_17	Predicted ORF	-	-	-	-	-	-	-	-	-	-	-	-	-	-	-	-	-	-	-	-	-	-	-	-	-	-	-	-	-	-	-	-
247	ORF5_18	467667	467957	-	96	ORF5_18	Predicted ORF	-	-	-	-	-	-	-	-	-	-	-	-	-	-	-	-	-	-	-	-	-	-	-	-	-	-	-	-	-	-	-	-
248	ORF5_21	471096	471764	+	222	ORF5_21	Predicted ORF	-	-	-	-	-	-	-	-	-	-	-	-	-	-	-	-	-	-	-	-	-	-	-	-	-	-	-	-	-	-	-	-
249	ORF5_22	471902	472366	+	154	ORF5_22	Predicted ORF	-	-	-	-	-	-	-	-	-	-	-	-	-	-	-	-	-	-	-	-	-	-	-	-	-	-	-	-	-	-	-	-
250	ORF5_23	472387	472809	+	140	ORF5_23	Predicted ORF	-	-	-	-	-	-	-	-	-	-	-	-	-	-	-	-	-	-	-	-	-	-	-	-	-	-	-	-	-	-	-	-
251	ORF5_24	472866	473840	+	324	ORF5_24	Predicted ORF	-	-	-	-	-	-	-	-	-	-	-	-	-	-	-	-	-	-	-	-	-	-	-	-	-	-	-	-	-	-	-	-
252	ORF5_25	473843	474325	+	160	ORF5_25	Predicted ORF	-	-	-	-	-	-	-	-	-	-	-	-	-	-	-	-	-	-	-	-	-	-	-	-	-	-	-	-	-	-	-	-
253	ORF5_27	476409	477302	-	297	ORF5_27	Predicted ORF	-	-	-	-	-	-	-	-	-	-	-	-	-	-	-	-	-	-	-	-	-	-	-	-	-	-	-	-	-	-	-	-
254	ORF5_28	477299	477544	-	81	ORF5_28	Predicted ORF	-	-	-	-	-	-	-	-	-	-	-	-	-	-	-	-	-	-	-	-	-	-	-	-	-	-	-	-	-	-	-	-
255	ORF5_31	479757	481211	+	484	ORF5_31	Predicted ORF	-	-	-	-	-	-	-	-	-	-	-	-	-	-	-	-	-	-	-	-	-	-	-	-	-	-	-	-	-	-	-	-
256	ORF5_32	481316	481921	-	201	ORF5_32	Predicted ORF	-	-	-	-	-	-	-	-	-	-	-	-	-	-	-	-	-	-	-	-	-	-	-	-	-	-	-	-	-	-	-	-
257	ORF5_33	481908	482828	-	306	ORF5_33	Predicted ORF	-	-	-	-	-	-	-	-	-	-	-	-	-	-	-	-	-	-	-	-	-	-	-	-	-	-	-	-	-	-	-	-
258	ORF5_34	482902	483393	+	163	ORF5_34	Predicted ORF	-	-	-	-	-	-	-	-	-	-	-	-	-	-	-	-	-	-	-	-	-	-	-	-	-	-	-	-	-	-	-	-
259	ORF5_35	483307	483492	-	61	ORF5_35	Predicted ORF	-	-	-	-	-	-	-	-	-	-	-	-	-	-	-	-	-	-	-	-	-	-	-	-	-	-	-	-	-	-	-	-
260	ORF5_36	483544	484275	-	243	ORF5_36	Predicted ORF	-	-	-	-	-	-	-	-	-	-	-	-	-	-	-	-	-	-	-	-	-	-	-	-	-	-	-	-	-	-	-	-
261	ORF5_38	485968	486300	-	110	ORF5_38	Predicted ORF	-	-	-	-	-	-	-	-	-	-	-	-	-	-	-	-	-	-	-	-	-	-	-	-	-	-	-	-	-	-	-	-
262	ORF5_40	486992	487567	-	191	ORF5_40	Predicted ORF	-	-	-	-	-	-	-	-	-	-	-	-	-	-	-	-	-	-	-	-	-	-	-	-	-	-	-	-	-	-	-	-
263	ORF5_41	487834	488136	-	100	ORF5_41	Predicted ORF	-	-	-	-	-	-	-	-	-	-	-	-	-	-	-	-	-	-	-	-	-	-	-	-	-	-	-	-	-	-	-	-
264	ORF5_42	488277	489218	-	313	ORF5_42	Predicted ORF	-	-	-	-	-	-	-	-	-	-	-	-	-	-	-	-	-	-	-	-	-	-	-	-	-	-	-	-	-	-	-	-
265	ORF5_43	489451	489762	+	103	ORF5_43	Predicted ORF	-	-	-	-	-	-	-	-	-	-	-	-	-	-	-	-	-	-	-	-	-	-	-	-	-	-	-	-	-	-	-	-
266	ORF5_44	490209	491612	+	467	ORF5_44	Predicted ORF	-	-	-	-	-	-	-	-	-	-	-	-	-	-	-	-	-	-	-	-	-	-	-	-	-	-	-	-	-	-	-	-
267	ORF5_45	491618	492862	+	414	ORF5_45	Predicted ORF	-	-	-	-	-	-	-	-	-	-	-	-	-	-	-	-	-	-	-	-	-	-	-	-	-	-	-	-	-	-	-	-
268	ORF5_46	492855	493634	+	259	ORF5_46	Predicted ORF	-	-	-	-	-	-	-	-	-	-	-	-	-	-	-	-	-	-	-	-	-	-	-	-	-	-	-	-	-	-	-	-
269	ORF5_48	494263	494859	+	198	ORF5_48	Predicted ORF;PAI|PAI_CAA21366 -	-	-	-	-	-	-	-	-	-	-	-	-	-	-	-	-	-	-	-	-	-	-	-	-	-	-	-	-	PAI_CAA21366	0.682	-	-
270	ORF5_49	494882	496105	+	407	ORF5_49	Predicted ORF	-	-	-	-	-	-	-	-	-	-	-	-	-	-	-	-	-	-	-	-	-	-	-	-	-	-	-	-	-	-	-	-
271	ORF5_50	496114	497148	+	344	ORF5_50	Predicted ORF	-	-	-	-	-	-	-	-	-	-	-	-	-	-	-	-	-	-	-	-	-	-	-	-	-	-	-	-	-	-	-	-
272	ORF5_51	497158	497379	+	73	ORF5_51	Predicted ORF	-	-	-	-	-	-	-	-	-	-	-	-	-	-	-	-	-	-	-	-	-	-	-	-	-	-	-	-	-	-	-	-
273	ORF5_53	498726	500186	-	486	ORF5_53	Predicted ORF	-	-	-	-	-	-	-	-	-	-	-	-	-	-	-	-	-	-	-	-	-	-	-	-	-	-	-	-	-	-	-	-
274	ORF5_54	500751	500849	+	32	ORF5_54	Predicted ORF	-	-	-	-	-	-	-	-	-	-	-	-	-	-	-	-	-	-	-	-	-	-	-	-	-	-	-	-	-	-	-	-
275	ORF5_55	501305	501766	+	153	ORF5_55	Predicted ORF;AR|AR_ZP_02197344 xanthine-guanine phosphoribosyltransferase	-	-	AR_ZP_01987481	0.68	-	-	-	-	-	-	-	-	-	-	-	-	-	-	-	-	-	-	-	-	-	-	-	-	-	-	-	-
276	ORF5_56	501861	503105	+	414	ORF5_56	Predicted ORF	-	-	-	-	-	-	-	-	-	-	-	-	-	-	-	-	-	-	-	-	-	-	-	-	-	-	-	-	-	-	-	-
277	ORF5_57	503167	503571	+	134	ORF5_57	Predicted ORF	-	-	-	-	-	-	-	-	-	-	-	-	-	-	-	-	-	-	-	-	-	-	-	-	-	-	-	-	-	-	-	-
278	ORF5_58	503691	504794	+	367	ORF5_58	Predicted ORF	-	-	-	-	-	-	-	-	-	-	-	-	-	-	-	-	-	-	-	-	-	-	-	-	-	-	-	-	-	-	-	-
279	ORF5_59	504805	506070	+	421	ORF5_59	Predicted ORF	-	-	-	-	-	-	-	-	-	-	-	-	-	-	-	-	-	-	-	-	-	-	-	-	-	-	-	-	-	-	-	-
280	ORF5_61	507545	510769	+	1074	ORF5_61	Predicted ORF;AR|AR_NP_249117 RND multidrug efflux transporter MexB	-	-	AR_NP_249117	0.425	-	-	-	-	-	-	-	-	-	-	-	-	-	-	-	-	-	-	-	-	-	-	-	-	-	-	-	-
281	ORF5_63	512359	513324	-	321	ORF5_63	Predicted ORF	-	-	-	-	-	-	-	-	-	-	-	-	-	-	-	-	-	-	-	-	-	-	-	-	-	-	-	-	-	-	-	-
282	ORF5_64	513317	513988	-	223	ORF5_64	Predicted ORF	-	-	-	-	-	-	-	-	-	-	-	-	-	-	-	-	-	-	-	-	-	-	-	-	-	-	-	-	-	-	-	-
283	ORF5_65	514044	514310	-	88	ORF5_65	Predicted ORF	-	-	-	-	-	-	-	-	-	-	-	-	-	-	-	-	-	-	-	-	-	-	-	-	-	-	-	-	-	-	-	-
284	ORF5_67	515863	516627	-	254	ORF5_67	Predicted ORF	-	-	-	-	-	-	-	-	-	-	-	-	-	-	-	-	-	-	-	-	-	-	-	-	-	-	-	-	-	-	-	-
285	ORF5_68	516636	517754	-	372	ORF5_68	Predicted ORF	-	-	-	-	-	-	-	-	-	-	-	-	-	-	-	-	-	-	-	-	-	-	-	-	-	-	-	-	-	-	-	-
286	ORF5_69	517747	519648	-	633	ORF5_69	Predicted ORF;AR|AR_YP_001570088 hypothetical protein SARI_01038	-	-	AR_ZP_03837173	0.512	-	-	-	-	-	-	-	-	-	-	-	-	-	-	-	-	-	-	-	-	-	-	-	-	-	-	-	-
287	ORF5_71	520164	520481	-	105	ORF5_71	Predicted ORF	-	-	-	-	-	-	-	-	-	-	-	-	-	-	-	-	-	-	-	-	-	-	-	-	-	-	-	-	-	-	-	-
288	ORF5_72	520557	521234	-	225	ORF5_72	Predicted ORF	-	-	-	-	-	-	-	-	-	-	-	-	-	-	-	-	-	-	-	-	-	-	-	-	-	-	-	-	-	-	-	-
289	ORF5_73	521231	522268	-	345	ORF5_73	Predicted ORF	-	-	-	-	-	-	-	-	-	-	-	-	-	-	-	-	-	-	-	-	-	-	-	-	-	-	-	-	-	-	-	-
290	ORF5_74	522279	522845	-	188	ORF5_74	Predicted ORF	-	-	-	-	-	-	-	-	-	-	-	-	-	-	-	-	-	-	-	-	-	-	-	-	-	-	-	-	-	-	-	-
291	ORF5_75	522861	525446	-	861	ORF5_75	Predicted ORF	-	-	-	-	-	-	-	-	-	-	-	-	-	-	-	-	-	-	-	-	-	-	-	-	-	-	-	-	-	-	-	-
292	ORF5_76	525690	526172	+	160	ORF5_76	Predicted ORF	-	-	-	-	-	-	-	-	-	-	-	-	-	-	-	-	-	-	-	-	-	-	-	-	-	-	-	-	-	-	-	-
293	ORF5_78	527843	528721	-	292	ORF5_78	Predicted ORF	-	-	-	-	-	-	-	-	-	-	-	-	-	-	-	-	-	-	-	-	-	-	-	-	-	-	-	-	-	-	-	-
294	ORF5_79	528739	529209	-	156	ORF5_79	Predicted ORF	-	-	-	-	-	-	-	-	-	-	-	-	-	-	-	-	-	-	-	-	-	-	-	-	-	-	-	-	-	-	-	-
295	ORF5_81	530380	531804	-	474	ORF5_81	Predicted ORF	-	-	-	-	-	-	-	-	-	-	-	-	-	-	-	-	-	-	-	-	-	-	-	-	-	-	-	-	-	-	-	-
296	ORF5_82	532109	533296	+	395	ORF5_82	Predicted ORF	-	-	-	-	-	-	-	-	-	-	-	-	-	-	-	-	-	-	-	-	-	-	-	-	-	-	-	-	-	-	-	-
297	ORF5_83	535028	536698	-	556	ORF5_83	Predicted ORF	-	-	-	-	-	-	-	-	-	-	-	-	-	-	-	-	-	-	-	-	-	-	-	-	-	-	-	-	-	-	-	-
298	ORF5_85	538627	539376	-	249	ORF5_85	Predicted ORF	-	-	-	-	-	-	-	-	-	-	-	-	-	-	-	-	-	-	-	-	-	-	-	-	-	-	-	-	-	-	-	-
299	ORF5_88	541861	542661	-	266	ORF5_88	Predicted ORF	-	-	-	-	-	-	-	-	-	-	-	-	-	-	-	-	-	-	-	-	-	-	-	-	-	-	-	-	-	-	-	-
300	ORF5_89	543041	544504	+	487	ORF5_89	Predicted ORF	-	-	-	-	-	-	-	-	-	-	-	-	-	-	-	-	-	-	-	-	-	-	-	-	-	-	-	-	-	-	-	-
301	ORF5_90	544616	547291	+	891	ORF5_90	Predicted ORF	-	-	-	-	-	-	-	-	-	-	-	-	-	-	-	-	-	-	-	-	-	-	-	-	-	-	-	-	-	-	-	-
302	ORF5_91	547590	549251	+	553	ORF5_91	Predicted ORF	-	-	-	-	-	-	-	-	-	-	-	-	-	-	-	-	-	-	-	-	-	-	-	-	-	-	-	-	-	-	-	-
303	ORF5_92	549492	549941	-	149	ORF5_92	Predicted ORF;VF|VFG0478 (gi:16764063) fur - transcriptional repressor of iron-responsive genes (Fur family) (ferric uptake regulator)	VFG0478	0.852	-	-	-	-	-	-	-	-	-	-	-	-	-	-	-	-	-	-	-	-	-	-	-	-	-	-	-	-	-	-
304	ORF5_93	550184	550729	+	181	ORF5_93	Predicted ORF	-	-	-	-	-	-	-	-	-	-	-	-	-	-	-	-	-	-	-	-	-	-	-	-	-	-	-	-	-	-	-	-
305	ORF5_95	551361	551675	-	104	ORF5_95	Predicted ORF	-	-	-	-	-	-	-	-	-	-	-	-	-	-	-	-	-	-	-	-	-	-	-	-	-	-	-	-	-	-	-	-
306	ORF5_96	551706	551927	-	73	ORF5_96	Predicted ORF	-	-	-	-	-	-	-	-	-	-	-	-	-	-	-	-	-	-	-	-	-	-	-	-	-	-	-	-	-	-	-	-
307	ORF5_98	552843	553364	+	173	ORF5_98	Predicted ORF	-	-	-	-	-	-	-	-	-	-	-	-	-	-	-	-	-	-	-	-	-	-	-	-	-	-	-	-	-	-	-	-
308	ORF5_100	555253	555453	+	66	ORF5_100	Predicted ORF	-	-	-	-	-	-	-	-	-	-	-	-	-	-	-	-	-	-	-	-	-	-	-	-	-	-	-	-	-	-	-	-
309	ORF5_101	555664	556611	+	315	ORF5_101	Predicted ORF;VF|VFG0490 (gi:16764739) orf319 - putative inner membrane protein	VFG0490	0.54	-	-	-	-	-	-	-	-	-	-	-	-	-	-	-	-	-	-	-	-	-	-	-	-	-	-	-	-	-	-
310	ORF5_102	556601	558073	+	490	ORF5_102	Predicted ORF	-	-	-	-	-	-	-	-	-	-	-	-	-	-	-	-	-	-	-	-	-	-	-	-	-	-	-	-	-	-	-	-
311	ORF5_103	558120	558881	+	253	ORF5_103	Predicted ORF	-	-	-	-	-	-	-	-	-	-	-	-	-	-	-	-	-	-	-	-	-	-	-	-	-	-	-	-	-	-	-	-
312	ORF5_105	560067	561359	-	430	ORF5_105	Predicted ORF	-	-	-	-	-	-	-	-	-	-	-	-	-	-	-	-	-	-	-	-	-	-	-	-	-	-	-	-	-	-	-	-
313	ORF5_106	561890	562279	+	129	ORF5_106	Predicted ORF	-	-	-	-	-	-	-	-	-	-	-	-	-	-	-	-	-	-	-	-	-	-	-	-	-	-	-	-	-	-	-	-
314	ORF5_107	562273	562620	+	115	ORF5_107	Predicted ORF	-	-	-	-	-	-	-	-	-	-	-	-	-	-	-	-	-	-	-	-	-	-	-	-	-	-	-	-	-	-	-	-
315	ORF5_108	562679	564388	+	569	ORF5_108	Predicted ORF	-	-	-	-	-	-	-	-	-	-	-	-	-	-	-	-	-	-	-	-	-	-	-	-	-	-	-	-	-	-	-	-
316	ORF5_109	564408	565127	+	239	ORF5_109	Predicted ORF	-	-	-	-	-	-	-	-	-	-	-	-	-	-	-	-	-	-	-	-	-	-	-	-	-	-	-	-	-	-	-	-
317	ORF5_110	565400	568207	+	935	ORF5_110	Predicted ORF	-	-	-	-	-	-	-	-	-	-	-	-	-	-	-	-	-	-	-	-	-	-	-	-	-	-	-	-	-	-	-	-
318	ORF5_111	568231	569457	+	408	ORF5_111	Predicted ORF	-	-	-	-	-	-	-	-	-	-	-	-	-	-	-	-	-	-	-	-	-	-	-	-	-	-	-	-	-	-	-	-
319	ORF5_112	569547	570713	+	388	ORF5_112	Predicted ORF	-	-	-	-	-	-	-	-	-	-	-	-	-	-	-	-	-	-	-	-	-	-	-	-	-	-	-	-	-	-	-	-
320	ORF5_113	570713	571585	+	290	ORF5_113	Predicted ORF	-	-	-	-	-	-	-	-	-	-	-	-	-	-	-	-	-	-	-	-	-	-	-	-	-	-	-	-	-	-	-	-
321	ORF5_119	576636	578918	+	760	ORF5_119	Predicted ORF;VF|VFG1859 (gi:52842863) feoB - ferrous iron transporter B	VFG1859	0.442	-	-	-	-	-	-	-	-	-	-	-	-	-	-	-	-	-	-	-	-	-	-	-	-	-	-	-	-	-	-
322	ORF5_120	578915	579157	+	80	ORF5_120	Predicted ORF	-	-	-	-	-	-	-	-	-	-	-	-	-	-	-	-	-	-	-	-	-	-	-	-	-	-	-	-	-	-	-	-
323	ORF5_121	579294	579734	-	146	ORF5_121	Predicted ORF	-	-	-	-	-	-	-	-	-	-	-	-	-	-	-	-	-	-	-	-	-	-	-	-	-	-	-	-	-	-	-	-
324	ORF5_123	582718	583377	-	219	ORF5_123	Predicted ORF	-	-	-	-	-	-	-	-	-	-	-	-	-	-	-	-	-	-	-	-	-	-	-	-	-	-	-	-	-	-	-	-
325	ORF5_129	590649	591356	+	235	ORF5_129	Predicted ORF	-	-	-	-	-	-	-	-	-	-	-	-	-	-	-	-	-	-	-	-	-	-	-	-	-	-	-	-	-	-	-	-
326	ORF5_130	591481	592158	-	225	ORF5_130	Predicted ORF	-	-	-	-	-	-	-	-	-	-	-	-	-	-	-	-	-	-	-	-	-	-	-	-	-	-	-	-	-	-	-	-
327	ORF5_131	592301	593131	+	276	ORF5_131	Predicted ORF	-	-	-	-	-	-	-	-	-	-	-	-	-	-	-	-	-	-	-	-	-	-	-	-	-	-	-	-	-	-	-	-
328	ORF5_132	593244	594557	-	437	ORF5_132	Predicted ORF	-	-	-	-	-	-	-	-	-	-	-	-	-	-	-	-	-	-	-	-	-	-	-	-	-	-	-	-	-	-	-	-
329	ORF5_133	594678	596006	-	442	ORF5_133	Predicted ORF	-	-	-	-	-	-	-	-	-	-	-	-	-	-	-	-	-	-	-	-	-	-	-	-	-	-	-	-	-	-	-	-
330	ORF5_134	596240	596734	+	164	ORF5_134	Predicted ORF	-	-	-	-	-	-	-	-	-	-	-	-	-	-	-	-	-	-	-	-	-	-	-	-	-	-	-	-	-	-	-	-
331	ORF5_135	597418	598101	+	227	ORF5_135	Predicted ORF	-	-	-	-	-	-	-	-	-	-	-	-	-	-	-	-	-	-	-	-	-	-	-	-	-	-	-	-	-	-	-	-
332	ORF5_137	600522	602276	-	584	ORF5_137	Predicted ORF	-	-	-	-	-	-	-	-	-	-	-	-	-	-	-	-	-	-	-	-	-	-	-	-	-	-	-	-	-	-	-	-
333	ORF5_138	602505	602954	+	149	ORF5_138	Predicted ORF	-	-	-	-	-	-	-	-	-	-	-	-	-	-	-	-	-	-	-	-	-	-	-	-	-	-	-	-	-	-	-	-
334	ORF5_139	603264	603530	-	88	ORF5_139	Predicted ORF	-	-	-	-	-	-	-	-	-	-	-	-	-	-	-	-	-	-	-	-	-	-	-	-	-	-	-	-	-	-	-	-
335	ORF5_140	603950	604135	+	61	ORF5_140	Predicted ORF	-	-	-	-	-	-	-	-	-	-	-	-	-	-	-	-	-	-	-	-	-	-	-	-	-	-	-	-	-	-	-	-
336	ORF5_141	604687	605082	+	131	ORF5_141	Predicted ORF	-	-	-	-	-	-	-	-	-	-	-	-	-	-	-	-	-	-	-	-	-	-	-	-	-	-	-	-	-	-	-	-
337	ORF5_142	605100	605402	+	100	ORF5_142	Predicted ORF	-	-	-	-	-	-	-	-	-	-	-	-	-	-	-	-	-	-	-	-	-	-	-	-	-	-	-	-	-	-	-	-
338	ORF5_143	605386	606108	+	240	ORF5_143	Predicted ORF	-	-	-	-	-	-	-	-	-	-	-	-	-	-	-	-	-	-	-	-	-	-	-	-	-	-	-	-	-	-	-	-
339	ORF5_144	606109	607005	+	298	ORF5_144	Predicted ORF	-	-	-	-	-	-	-	-	-	-	-	-	-	-	-	-	-	-	-	-	-	-	-	-	-	-	-	-	-	-	-	-
340	ORF5_145	607083	607277	-	64	ORF5_145	Predicted ORF	-	-	-	-	-	-	-	-	-	-	-	-	-	-	-	-	-	-	-	-	-	-	-	-	-	-	-	-	-	-	-	-
341	ORF5_146	607612	608085	+	157	ORF5_146	Predicted ORF	-	-	-	-	-	-	-	-	-	-	-	-	-	-	-	-	-	-	-	-	-	-	-	-	-	-	-	-	-	-	-	-
342	ORF5_147	608430	609551	+	373	ORF5_147	Predicted ORF	-	-	-	-	-	-	-	-	-	-	-	-	-	-	-	-	-	-	-	-	-	-	-	-	-	-	-	-	-	-	-	-
343	ORF5_151	612804	613946	+	380	ORF5_151	Predicted ORF	-	-	-	-	-	-	-	-	-	-	-	-	-	-	-	-	-	-	-	-	-	-	-	-	-	-	-	-	-	-	-	-
344	ORF5_152	614152	614652	-	166	ORF5_152	Predicted ORF	-	-	-	-	-	-	-	-	-	-	-	-	-	-	-	-	-	-	-	-	-	-	-	-	-	-	-	-	-	-	-	-
345	ORF5_153	614931	615599	-	222	ORF5_153	Predicted ORF	-	-	-	-	-	-	-	-	-	-	-	-	-	-	-	-	-	-	-	-	-	-	-	-	-	-	-	-	-	-	-	-
346	ORF5_154	615599	616273	-	224	ORF5_154	Predicted ORF	-	-	-	-	-	-	-	-	-	-	-	-	-	-	-	-	-	-	-	-	-	-	-	-	-	-	-	-	-	-	-	-
347	ORF5_157	618443	619060	-	205	ORF5_157	Predicted ORF	-	-	-	-	-	-	-	-	-	-	-	-	-	-	-	-	-	-	-	-	-	-	-	-	-	-	-	-	-	-	-	-
348	ORF5_158	619054	619830	-	258	ORF5_158	Predicted ORF	-	-	-	-	-	-	-	-	-	-	-	-	-	-	-	-	-	-	-	-	-	-	-	-	-	-	-	-	-	-	-	-
349	ORF5_159	619812	620549	-	245	ORF5_159	Predicted ORF	-	-	-	-	-	-	-	-	-	-	-	-	-	-	-	-	-	-	-	-	-	-	-	-	-	-	-	-	-	-	-	-
350	ORF5_160	620555	621163	-	202	ORF5_160	Predicted ORF	-	-	-	-	-	-	-	-	-	-	-	-	-	-	-	-	-	-	-	-	-	-	-	-	-	-	-	-	-	-	-	-
351	ORF5_161	621164	622297	-	377	ORF5_161	Predicted ORF	-	-	-	-	-	-	-	-	-	-	-	-	-	-	-	-	-	-	-	-	-	-	-	-	-	-	-	-	-	-	-	-
352	ORF5_163	623430	624782	-	450	ORF5_163	Predicted ORF	-	-	-	-	-	-	-	-	-	-	-	-	-	-	-	-	-	-	-	-	-	-	-	-	-	-	-	-	-	-	-	-
353	ORF5_164	624788	625687	-	299	ORF5_164	Predicted ORF	-	-	-	-	-	-	-	-	-	-	-	-	-	-	-	-	-	-	-	-	-	-	-	-	-	-	-	-	-	-	-	-
354	ORF5_165	626496	628415	+	639	ORF5_165	Predicted ORF	-	-	-	-	-	-	-	-	-	-	-	-	-	-	-	-	-	-	-	-	-	-	-	-	-	-	-	-	-	-	-	-
355	ORF5_166	628580	629281	+	233	ORF5_166	Predicted ORF	-	-	-	-	-	-	-	-	-	-	-	-	-	-	-	-	-	-	-	-	-	-	-	-	-	-	-	-	-	-	-	-
356	ORF5_167	629782	630147	+	121	ORF5_167	Predicted ORF	-	-	-	-	-	-	-	-	-	-	-	-	-	-	-	-	-	-	-	-	-	-	-	-	-	-	-	-	-	-	-	-
357	ORF5_168	630216	630326	-	36	ORF5_168	Predicted ORF	-	-	-	-	-	-	-	-	-	-	-	-	-	-	-	-	-	-	-	-	-	-	-	-	-	-	-	-	-	-	-	-
358	ORF5_170	632425	633561	+	378	ORF5_170	Predicted ORF	-	-	-	-	-	-	-	-	-	-	-	-	-	-	-	-	-	-	-	-	-	-	-	-	-	-	-	-	-	-	-	-
359	ORF5_171	633581	633841	-	86	ORF5_171	Predicted ORF	-	-	-	-	-	-	-	-	-	-	-	-	-	-	-	-	-	-	-	-	-	-	-	-	-	-	-	-	-	-	-	-
360	ORF5_173	634688	635389	-	233	ORF5_173	Predicted ORF	-	-	-	-	-	-	-	-	-	-	-	-	-	-	-	-	-	-	-	-	-	-	-	-	-	-	-	-	-	-	-	-
361	ORF5_174	635516	635809	+	97	ORF5_174	Predicted ORF	-	-	-	-	-	-	-	-	-	-	-	-	-	-	-	-	-	-	-	-	-	-	-	-	-	-	-	-	-	-	-	-
362	ORF5_177	637864	640332	-	822	ORF5_177	Predicted ORF	-	-	-	-	-	-	-	-	-	-	-	-	-	-	-	-	-	-	-	-	-	-	-	-	-	-	-	-	-	-	-	-
363	ORF5_178	640550	640996	+	148	ORF5_178	Predicted ORF	-	-	-	-	-	-	-	-	-	-	-	-	-	-	-	-	-	-	-	-	-	-	-	-	-	-	-	-	-	-	-	-
364	ORF5_180	642172	642702	-	176	ORF5_180	Predicted ORF	-	-	-	-	-	-	-	-	-	-	-	-	-	-	-	-	-	-	-	-	-	-	-	-	-	-	-	-	-	-	-	-
365	ORF5_181	642858	644456	-	532	ORF5_181	Predicted ORF	-	-	-	-	-	-	-	-	-	-	-	-	-	-	-	-	-	-	-	-	-	-	-	-	-	-	-	-	-	-	-	-
366	ORF5_182	644688	645749	-	353	ORF5_182	Predicted ORF;Prophage|Prophage_148727179 NC_009542 int putative integrase protein {Phage phiO18P}	-	-	-	-	-	-	-	-	-	-	-	-	Prophage_9634085	0.482	-	-	-	-	-	-	-	-	-	-	-	-	-	-	-	-	-	-
367	ORF5_183	645749	646111	-	120	ORF5_183	Predicted ORF	-	-	-	-	-	-	-	-	-	-	-	-	-	-	-	-	-	-	-	-	-	-	-	-	-	-	-	-	-	-	-	-
368	ORF5_185	646652	647422	-	256	ORF5_185	Predicted ORF;Prophage|Prophage_38229113 NC_005178 cI c repressor {Pseudomonas phage D3112}	-	-	-	-	-	-	-	-	-	-	-	-	Prophage_148727133	0.461	-	-	-	-	-	-	-	-	-	-	-	-	-	-	-	-	-	-
369	ORF5_186	647595	647798	+	67	ORF5_186	Predicted ORF	-	-	-	-	-	-	-	-	-	-	-	-	-	-	-	-	-	-	-	-	-	-	-	-	-	-	-	-	-	-	-	-
370	ORF5_187	647826	648332	+	168	ORF5_187	Predicted ORF;Prophage|Prophage_9634088 NC_001317 cII CII {Enterobacteria phage 186}	-	-	-	-	-	-	-	-	-	-	-	-	Prophage_148727135	0.476	-	-	-	-	-	-	-	-	-	-	-	-	-	-	-	-	-	-
371	ORF5_190	649195	649410	+	71	ORF5_190	Predicted ORF	-	-	-	-	-	-	-	-	-	-	-	-	-	-	-	-	-	-	-	-	-	-	-	-	-	-	-	-	-	-	-	-
372	ORF5_191	649422	649883	+	153	ORF5_191	Predicted ORF	-	-	-	-	-	-	-	-	-	-	-	-	-	-	-	-	-	-	-	-	-	-	-	-	-	-	-	-	-	-	-	-
373	ORF5_192	650017	650385	+	122	ORF5_192	Predicted ORF	-	-	-	-	-	-	-	-	-	-	-	-	-	-	-	-	-	-	-	-	-	-	-	-	-	-	-	-	-	-	-	-
374	ORF5_196	654444	655514	-	356	ORF5_196	Predicted ORF;Prophage|Prophage_72537722 NC_007145 pbsx family phage portal protein {Burkholderia phage phi52237}	-	-	-	-	-	-	-	-	-	-	-	-	Prophage_145708079	0.579	-	-	-	-	-	-	-	-	-	-	-	-	-	-	-	-	-	-
375	ORF5_197	655514	657229	-	571	ORF5_197	Predicted ORF;Prophage|Prophage_9630329 NC_001895 P gpP {Enterobacteria phage P2}	-	-	-	-	-	-	-	-	-	-	-	-	Prophage_145708080	0.625	-	-	-	-	-	-	-	-	-	-	-	-	-	-	-	-	-	-
376	ORF5_198	657435	658265	+	276	ORF5_198	Predicted ORF;Prophage|Prophage_9634059 NC_001317 V V protein {Enterobacteria phage 186}	-	-	-	-	-	-	-	-	-	-	-	-	Prophage_109289939	0.486	-	-	-	-	-	-	-	-	-	-	-	-	-	-	-	-	-	-
377	ORF5_199	658278	659309	+	343	ORF5_199	Predicted ORF;Prophage|Prophage_134288735 NC_009236 gp2 phage major capsid protein P2 family {Burkholderia phage phiE12-2}	-	-	-	-	-	-	-	-	-	-	-	-	Prophage_72537718	0.554	-	-	-	-	-	-	-	-	-	-	-	-	-	-	-	-	-	-
378	ORF5_200	659319	660026	+	235	ORF5_200	Predicted ORF;Prophage|Prophage_134288705 NC_009236 gp1 phage small terminase subunit {Burkholderia phage phiE12-2}	-	-	-	-	-	-	-	-	-	-	-	-	Prophage_145708083	0.441	-	-	-	-	-	-	-	-	-	-	-	-	-	-	-	-	-	-
379	ORF5_201	660132	660611	+	159	ORF5_201	Predicted ORF;Prophage|Prophage_9630333 NC_001895 L gpL {Enterobacteria phage P2}	-	-	-	-	-	-	-	-	-	-	-	-	Prophage_145708084	0.44	-	-	-	-	-	-	-	-	-	-	-	-	-	-	-	-	-	-
380	ORF5_202	660611	660814	+	67	ORF5_202	Predicted ORF;Prophage|Prophage_134288782 NC_009234 gp46 phage Tail Protein X {Burkholderia phage phiE202}	-	-	-	-	-	-	-	-	-	-	-	-	Prophage_134288701	0.515	-	-	-	-	-	-	-	-	-	-	-	-	-	-	-	-	-	-
381	ORF5_205	661405	661860	+	151	ORF5_205	Predicted ORF	-	-	-	-	-	-	-	-	-	-	-	-	-	-	-	-	-	-	-	-	-	-	-	-	-	-	-	-	-	-	-	-
382	ORF5_207	662159	662980	+	273	ORF5_207	Predicted ORF;Prophage|Prophage_134288699 NC_009236 gp45 bacteriophage-acquired protein {Burkholderia phage phiE12-2}	-	-	-	-	-	-	-	-	-	-	-	-	Prophage_17313229	0.487	-	-	-	-	-	-	-	-	-	-	-	-	-	-	-	-	-	-
383	ORF5_209	663512	663967	+	151	ORF5_209	Predicted ORF;Prophage|Prophage_134288754 NC_009234 gp40 P2 phage tail completion protein R (GpR) {Burkholderia phage phiE202}	-	-	-	-	-	-	-	-	-	-	-	-	Prophage_145708090	0.444	-	-	-	-	-	-	-	-	-	-	-	-	-	-	-	-	-	-
384	ORF5_212	665044	665382	+	112	ORF5_212	Predicted ORF;Prophage|Prophage_33438913 NC_005056 similar to P2 W putative baseplate protein {Enterobacteria phage WPhi}	-	-	-	-	-	-	-	-	-	-	-	-	Prophage_9634071	0.446	-	-	-	-	-	-	-	-	-	-	-	-	-	-	-	-	-	-
385	ORF5_213	665379	666284	+	301	ORF5_213	Predicted ORF;Prophage|Prophage_30065720 NC_004745 J gpJ {Yersinia phage L-413C}	-	-	-	-	-	-	-	-	-	-	-	-	Prophage_145708095	0.498	-	-	-	-	-	-	-	-	-	-	-	-	-	-	-	-	-	-
386	ORF5_214	666281	666898	+	205	ORF5_214	Predicted ORF;Prophage|Prophage_33438915 NC_005056 similar to P2 I putative baseplate assembly protein {Enterobacteria phage WPhi}	-	-	-	-	-	-	-	-	-	-	-	-	Prophage_145708096	0.507	-	-	-	-	-	-	-	-	-	-	-	-	-	-	-	-	-	-
387	ORF5_217	668461	669636	+	391	ORF5_217	Predicted ORF;Prophage|Prophage_17313241 NC_003278 hypothetical protein {Pseudomonas phage phiCTX}	-	-	-	-	-	-	-	-	-	-	-	-	Prophage_145708101	0.637	-	-	-	-	-	-	-	-	-	-	-	-	-	-	-	-	-	-
388	ORF5_218	669652	670167	+	171	ORF5_218	Predicted ORF;Prophage|Prophage_33438920 NC_005056 similar to P2 FII tail tube {Enterobacteria phage WPhi}	-	-	-	-	-	-	-	-	-	-	-	-	Prophage_41057374	0.517	-	-	-	-	-	-	-	-	-	-	-	-	-	-	-	-	-	-
389	ORF5_219	670230	670511	+	93	ORF5_219	Predicted ORF;Prophage|Prophage_134288708 NC_009236 gp31 phage tail protein E {Burkholderia phage phiE12-2}	-	-	-	-	-	-	-	-	-	-	-	-	Prophage_145708103	0.505	-	-	-	-	-	-	-	-	-	-	-	-	-	-	-	-	-	-
390	ORF5_221	673111	673602	+	163	ORF5_221	Predicted ORF;Prophage|Prophage_9634081 NC_001317 F F protein {Enterobacteria phage 186}	-	-	-	-	-	-	-	-	-	-	-	-	Prophage_9630354	0.46	-	-	-	-	-	-	-	-	-	-	-	-	-	-	-	-	-	-
391	ORF5_222	673599	674735	+	378	ORF5_222	Predicted ORF;Prophage|Prophage_33438925 NC_005056 similar to P2 D tail protein {Enterobacteria phage WPhi}	-	-	-	-	-	-	-	-	-	-	-	-	Prophage_41057378	0.468	-	-	-	-	-	-	-	-	-	-	-	-	-	-	-	-	-	-
392	ORF5_227	681254	682132	-	292	ORF5_227	Predicted ORF	-	-	-	-	-	-	-	-	-	-	-	-	-	-	-	-	-	-	-	-	-	-	-	-	-	-	-	-	-	-	-	-
393	ORF5_229	683759	684163	+	134	ORF5_229	Predicted ORF	-	-	-	-	-	-	-	-	-	-	-	-	-	-	-	-	-	-	-	-	-	-	-	-	-	-	-	-	-	-	-	-
394	ORF5_230	684271	684552	+	93	ORF5_230	Predicted ORF	-	-	-	-	-	-	-	-	-	-	-	-	-	-	-	-	-	-	-	-	-	-	-	-	-	-	-	-	-	-	-	-
395	ORF5_231	684707	685720	-	337	ORF5_231	Predicted ORF	-	-	-	-	-	-	-	-	-	-	-	-	-	-	-	-	-	-	-	-	-	-	-	-	-	-	-	-	-	-	-	-
396	ORF5_232	685836	686033	+	65	ORF5_232	Predicted ORF	-	-	-	-	-	-	-	-	-	-	-	-	-	-	-	-	-	-	-	-	-	-	-	-	-	-	-	-	-	-	-	-
397	ORF5_234	687991	690006	+	671	ORF5_234	Predicted ORF	-	-	-	-	-	-	-	-	-	-	-	-	-	-	-	-	-	-	-	-	-	-	-	-	-	-	-	-	-	-	-	-
398	ORF5_235	690164	690712	+	182	ORF5_235	Predicted ORF	-	-	-	-	-	-	-	-	-	-	-	-	-	-	-	-	-	-	-	-	-	-	-	-	-	-	-	-	-	-	-	-
399	ORF5_236	690818	691864	+	348	ORF5_236	Predicted ORF	-	-	-	-	-	-	-	-	-	-	-	-	-	-	-	-	-	-	-	-	-	-	-	-	-	-	-	-	-	-	-	-
400	ORF5_237	691852	692955	+	367	ORF5_237	Predicted ORF	-	-	-	-	-	-	-	-	-	-	-	-	-	-	-	-	-	-	-	-	-	-	-	-	-	-	-	-	-	-	-	-
401	ORF5_239	695095	695589	+	164	ORF5_239	Predicted ORF	-	-	-	-	-	-	-	-	-	-	-	-	-	-	-	-	-	-	-	-	-	-	-	-	-	-	-	-	-	-	-	-
402	ORF5_240	695746	696159	-	137	ORF5_240	Predicted ORF	-	-	-	-	-	-	-	-	-	-	-	-	-	-	-	-	-	-	-	-	-	-	-	-	-	-	-	-	-	-	-	-
403	ORF5_242	697406	698200	+	264	ORF5_242	Predicted ORF	-	-	-	-	-	-	-	-	-	-	-	-	-	-	-	-	-	-	-	-	-	-	-	-	-	-	-	-	-	-	-	-
404	ORF5_243	698312	699013	+	233	ORF5_243	Predicted ORF	-	-	-	-	-	-	-	-	-	-	-	-	-	-	-	-	-	-	-	-	-	-	-	-	-	-	-	-	-	-	-	-
405	ORF5_244	699039	699773	+	244	ORF5_244	Predicted ORF	-	-	-	-	-	-	-	-	-	-	-	-	-	-	-	-	-	-	-	-	-	-	-	-	-	-	-	-	-	-	-	-
406	ORF5_245	699922	700728	-	268	ORF5_245	Predicted ORF	-	-	-	-	-	-	-	-	-	-	-	-	-	-	-	-	-	-	-	-	-	-	-	-	-	-	-	-	-	-	-	-
407	ORF5_246	701711	702214	+	167	ORF5_246	Predicted ORF	-	-	-	-	-	-	-	-	-	-	-	-	-	-	-	-	-	-	-	-	-	-	-	-	-	-	-	-	-	-	-	-
408	ORF5_248	703443	703994	-	183	ORF5_248	Predicted ORF	-	-	-	-	-	-	-	-	-	-	-	-	-	-	-	-	-	-	-	-	-	-	-	-	-	-	-	-	-	-	-	-
409	ORF5_249	704095	705009	+	304	ORF5_249	Predicted ORF	-	-	-	-	-	-	-	-	-	-	-	-	-	-	-	-	-	-	-	-	-	-	-	-	-	-	-	-	-	-	-	-
410	ORF5_252	708194	709102	+	302	ORF5_252	Predicted ORF;	-	-	-	-	-	-	-	-	-	-	-	-	-	-	-	-	-	-	-	-	-	-	-	-	-	-	-	-	-	-	ARI_697403908	0.533
411	ORF5_253	709125	710138	+	337	ORF5_253	Predicted ORF;	VFG2361	0.599	-	-	-	-	-	-	-	-	-	-	-	-	-	-	-	-	-	-	-	-	-	-	-	-	-	-	-	-	ARI_484359538	0.564
412	ORF5_255	711569	712576	+	335	ORF5_255	Predicted ORF;	-	-	-	-	-	-	-	-	-	-	-	-	-	-	-	-	-	-	-	-	-	-	-	-	-	-	-	-	-	-	ARI_506705	0.606
413	ORF5_256	712731	713141	-	136	ORF5_256	Predicted ORF;PAI|PAI_284931885|ref|ADC31743.1| putative DNA-binding protein	-	-	-	-	-	-	-	-	-	-	-	-	-	-	-	-	-	-	-	-	-	-	-	-	-	-	-	-	PAI_569550114	0.463	-	-
414	ORF5_257	713515	713691	+	58	ORF5_257	Predicted ORF	-	-	-	-	-	-	-	-	-	-	-	-	-	-	-	-	-	-	-	-	-	-	-	-	-	-	-	-	-	-	-	-
415	ORF5_258	713739	715325	+	528	ORF5_258	Predicted ORF	-	-	-	-	-	-	-	-	-	-	-	-	-	-	-	-	-	-	-	-	-	-	-	-	-	-	-	-	-	-	-	-
416	ORF5_259	715440	716021	+	193	ORF5_259	Predicted ORF;Prophage|Prophage_66391595 NC_007023 tk Tk thymidine kinase {Enterobacteria phage RB43}	-	-	-	-	-	-	-	-	-	-	-	-	Prophage_157311388	0.554	-	-	-	-	-	-	-	-	-	-	-	-	-	-	-	-	-	-
417	ORF5_260	716163	716669	-	168	ORF5_260	Predicted ORF	-	-	-	-	-	-	-	-	-	-	-	-	-	-	-	-	-	-	-	-	-	-	-	-	-	-	-	-	-	-	-	-
418	ORF5_263	720586	720996	-	136	ORF5_263	Predicted ORF	-	-	-	-	-	-	-	-	-	-	-	-	-	-	-	-	-	-	-	-	-	-	-	-	-	-	-	-	-	-	-	-
419	ORF5_264	721021	721458	-	145	ORF5_264	Predicted ORF	-	-	-	-	-	-	-	-	-	-	-	-	-	-	-	-	-	-	-	-	-	-	-	-	-	-	-	-	-	-	-	-
420	ORF5_266	723419	724288	-	289	ORF5_266	Predicted ORF	-	-	-	-	-	-	-	-	-	-	-	-	-	-	-	-	-	-	-	-	-	-	-	-	-	-	-	-	-	-	-	-
421	ORF5_267	724628	725362	+	244	ORF5_267	Predicted ORF	-	-	-	-	-	-	-	-	-	-	-	-	-	-	-	-	-	-	-	-	-	-	-	-	-	-	-	-	-	-	-	-
422	ORF5_268	726106	727677	+	523	ORF5_268	Predicted ORF	-	-	-	-	-	-	-	-	-	-	-	-	-	-	-	-	-	-	-	-	-	-	-	-	-	-	-	-	-	-	-	-
423	ORF5_269	728048	728551	+	167	ORF5_269	Predicted ORF	-	-	-	-	-	-	-	-	-	-	-	-	-	-	-	-	-	-	-	-	-	-	-	-	-	-	-	-	-	-	-	-
424	ORF5_270	728678	729679	+	333	ORF5_270	Predicted ORF	-	-	-	-	-	-	-	-	-	-	-	-	-	-	-	-	-	-	-	-	-	-	-	-	-	-	-	-	-	-	-	-
425	ORF5_275	733963	734286	+	107	ORF5_275	Predicted ORF	-	-	-	-	-	-	-	-	-	-	-	-	-	-	-	-	-	-	-	-	-	-	-	-	-	-	-	-	-	-	-	-
426	ORF5_276	734458	735855	-	465	ORF5_276	Predicted ORF	-	-	-	-	-	-	-	-	-	-	-	-	-	-	-	-	-	-	-	-	-	-	-	-	-	-	-	-	-	-	-	-
427	ORF5_277	735881	736219	-	112	ORF5_277	Predicted ORF	-	-	-	-	-	-	-	-	-	-	-	-	-	-	-	-	-	-	-	-	-	-	-	-	-	-	-	-	-	-	-	-
428	ORF5_278	736570	736710	+	46	ORF5_278	Predicted ORF	-	-	-	-	-	-	-	-	-	-	-	-	-	-	-	-	-	-	-	-	-	-	-	-	-	-	-	-	-	-	-	-
429	ORF5_280	738765	742178	+	1137	ORF5_280	Predicted ORF	-	-	-	-	-	-	-	-	-	-	-	-	-	-	-	-	-	-	-	-	-	-	-	-	-	-	-	-	-	-	-	-
430	ORF5_281	742329	742493	-	54	ORF5_281	Predicted ORF	-	-	-	-	-	-	-	-	-	-	-	-	-	-	-	-	-	-	-	-	-	-	-	-	-	-	-	-	-	-	-	-
431	ORF5_282	742537	742785	-	82	ORF5_282	Predicted ORF	-	-	-	-	-	-	-	-	-	-	-	-	-	-	-	-	-	-	-	-	-	-	-	-	-	-	-	-	-	-	-	-
432	ORF5_283	743083	743622	-	179	ORF5_283	Predicted ORF	-	-	-	-	-	-	-	-	-	-	-	-	-	-	-	-	-	-	-	-	-	-	-	-	-	-	-	-	-	-	-	-
433	ORF5_286	747953	748066	+	37	ORF5_286	Predicted ORF	-	-	-	-	-	-	-	-	-	-	-	-	-	-	-	-	-	-	-	-	-	-	-	-	-	-	-	-	-	-	-	-
434	ORF5_287	748124	748480	+	118	ORF5_287	Predicted ORF	-	-	-	-	-	-	-	-	-	-	-	-	-	-	-	-	-	-	-	-	-	-	-	-	-	-	-	-	-	-	-	-
435	ORF5_289	750624	751169	+	181	ORF5_289	Predicted ORF	-	-	-	-	-	-	-	-	-	-	-	-	-	-	-	-	-	-	-	-	-	-	-	-	-	-	-	-	-	-	-	-
436	ORF5_291	753688	754020	+	110	ORF5_291	Predicted ORF	-	-	-	-	-	-	-	-	-	-	-	-	-	-	-	-	-	-	-	-	-	-	-	-	-	-	-	-	-	-	-	-
437	ORF5_292	754032	754640	+	202	ORF5_292	Predicted ORF	-	-	-	-	-	-	-	-	-	-	-	-	-	-	-	-	-	-	-	-	-	-	-	-	-	-	-	-	-	-	-	-
438	ORF5_293	754912	756813	+	633	ORF5_293	Predicted ORF	-	-	-	-	-	-	-	-	-	-	-	-	-	-	-	-	-	-	-	-	-	-	-	-	-	-	-	-	-	-	-	-
439	ORF5_294	757050	757694	+	214	ORF5_294	Predicted ORF	-	-	-	-	-	-	-	-	-	-	-	-	-	-	-	-	-	-	-	-	-	-	-	-	-	-	-	-	-	-	-	-
440	ORF5_295	758025	759008	+	327	ORF5_295	Predicted ORF	-	-	-	-	-	-	-	-	-	-	-	-	-	-	-	-	-	-	-	-	-	-	-	-	-	-	-	-	-	-	-	-
441	ORF5_296	759243	760553	+	436	ORF5_296	Predicted ORF	-	-	-	-	-	-	-	-	-	-	-	-	-	-	-	-	-	-	-	-	-	-	-	-	-	-	-	-	-	-	-	-
442	ORF5_297	760903	762090	+	395	ORF5_297	Predicted ORF	-	-	-	-	-	-	-	-	-	-	-	-	-	-	-	-	-	-	-	-	-	-	-	-	-	-	-	-	-	-	-	-
443	ORF5_298	762424	763359	+	311	ORF5_298	Predicted ORF	-	-	-	-	-	-	-	-	-	-	-	-	-	-	-	-	-	-	-	-	-	-	-	-	-	-	-	-	-	-	-	-
444	ORF5_299	763831	765135	+	434	ORF5_299	Predicted ORF	-	-	-	-	-	-	-	-	-	-	-	-	-	-	-	-	-	-	-	-	-	-	-	-	-	-	-	-	-	-	-	-
445	ORF5_302	767403	769760	+	785	ORF5_302	Predicted ORF	-	-	-	-	-	-	-	-	-	-	-	-	-	-	-	-	-	-	-	-	-	-	-	-	-	-	-	-	-	-	-	-
446	ORF5_303	770003	770278	+	91	ORF5_303	Predicted ORF;Prophage|Prophage_9630187 NC_001884 yonN histone-like prokaryotic DNA-binding protein family {Bacillus phage SPBc2}	-	-	-	-	-	-	-	-	-	-	-	-	Prophage_156564019	0.56	-	-	-	-	-	-	-	-	-	-	-	-	-	-	-	-	-	-
447	ORF5_304	770408	772276	+	622	ORF5_304	Predicted ORF	-	-	-	-	-	-	-	-	-	-	-	-	-	-	-	-	-	-	-	-	-	-	-	-	-	-	-	-	-	-	-	-
448	ORF5_305	772446	772853	+	135	ORF5_305	Predicted ORF	-	-	-	-	-	-	-	-	-	-	-	-	-	-	-	-	-	-	-	-	-	-	-	-	-	-	-	-	-	-	-	-
449	ORF5_306	772906	773520	-	204	ORF5_306	Predicted ORF	-	-	-	-	-	-	-	-	-	-	-	-	-	-	-	-	-	-	-	-	-	-	-	-	-	-	-	-	-	-	-	-
450	ORF5_308	775618	776310	-	230	ORF5_308	Predicted ORF;Prophage|Prophage_29566196 NC_004684 gp3 {Mycobacterium phage Rosebush}	-	-	-	-	-	-	-	-	-	-	-	-	Prophage_146329947	0.439	-	-	-	-	-	-	-	-	-	-	-	-	-	-	-	-	-	-
451	ORF5_309	776451	777572	+	373	ORF5_309	Predicted ORF	-	-	-	-	-	-	-	-	-	-	-	-	-	-	-	-	-	-	-	-	-	-	-	-	-	-	-	-	-	-	-	-
452	ORF5_310	777824	778888	-	354	ORF5_310	Predicted ORF	-	-	-	-	-	-	-	-	-	-	-	-	-	-	-	-	-	-	-	-	-	-	-	-	-	-	-	-	-	-	-	-
453	ORF5_312	779827	781008	+	393	ORF5_312	Predicted ORF	-	-	-	-	-	-	-	-	-	-	-	-	-	-	-	-	-	-	-	-	-	-	-	-	-	-	-	-	-	-	-	-
454	ORF5_313	781149	781700	+	183	ORF5_313	Predicted ORF	-	-	-	-	-	-	-	-	-	-	-	-	-	-	-	-	-	-	-	-	-	-	-	-	-	-	-	-	-	-	-	-
455	ORF5_314	781727	782239	+	170	ORF5_314	Predicted ORF	-	-	-	-	-	-	-	-	-	-	-	-	-	-	-	-	-	-	-	-	-	-	-	-	-	-	-	-	-	-	-	-
456	ORF5_315	782434	784572	-	712	ORF5_315	Predicted ORF	-	-	-	-	-	-	-	-	-	-	-	-	-	-	-	-	-	-	-	-	-	-	-	-	-	-	-	-	-	-	-	-
457	ORF5_316	784648	785850	-	400	ORF5_316	Predicted ORF	-	-	-	-	-	-	-	-	-	-	-	-	-	-	-	-	-	-	-	-	-	-	-	-	-	-	-	-	-	-	-	-
458	ORF5_317	786169	786624	+	151	ORF5_317	Predicted ORF	-	-	-	-	-	-	-	-	-	-	-	-	-	-	-	-	-	-	-	-	-	-	-	-	-	-	-	-	-	-	-	-
459	ORF5_318	787370	787864	+	164	ORF5_318	Predicted ORF	-	-	-	-	-	-	-	-	-	-	-	-	-	-	-	-	-	-	-	-	-	-	-	-	-	-	-	-	-	-	-	-
460	ORF5_321	791604	792464	-	286	ORF5_321	Predicted ORF	-	-	-	-	-	-	-	-	-	-	-	-	-	-	-	-	-	-	-	-	-	-	-	-	-	-	-	-	-	-	-	-
461	ORF5_322	793181	794935	-	584	ORF5_322	Predicted ORF	-	-	-	-	-	-	-	-	-	-	-	-	-	-	-	-	-	-	-	-	-	-	-	-	-	-	-	-	-	-	-	-
462	ORF5_323	795044	795625	-	193	ORF5_323	Predicted ORF	-	-	-	-	-	-	-	-	-	-	-	-	-	-	-	-	-	-	-	-	-	-	-	-	-	-	-	-	-	-	-	-
463	ORF5_324	795810	796886	+	358	ORF5_324	Predicted ORF	-	-	-	-	-	-	-	-	-	-	-	-	-	-	-	-	-	-	-	-	-	-	-	-	-	-	-	-	-	-	-	-
464	ORF5_325	796966	797403	-	145	ORF5_325	Predicted ORF	-	-	-	-	-	-	-	-	-	-	-	-	-	-	-	-	-	-	-	-	-	-	-	-	-	-	-	-	-	-	-	-
465	ORF5_326	797450	798055	-	201	ORF5_326	Predicted ORF	-	-	-	-	-	-	-	-	-	-	-	-	-	-	-	-	-	-	-	-	-	-	-	-	-	-	-	-	-	-	-	-
466	ORF5_329	801176	802870	+	564	ORF5_329	Predicted ORF	-	-	-	-	-	-	-	-	-	-	-	-	-	-	-	-	-	-	-	-	-	-	-	-	-	-	-	-	-	-	-	-
467	ORF5_330	802854	803753	+	299	ORF5_330	Predicted ORF	-	-	-	-	-	-	-	-	-	-	-	-	-	-	-	-	-	-	-	-	-	-	-	-	-	-	-	-	-	-	-	-
468	ORF5_332	804739	805710	+	323	ORF5_332	Predicted ORF	-	-	-	-	-	-	-	-	-	-	-	-	-	-	-	-	-	-	-	-	-	-	-	-	-	-	-	-	-	-	-	-
469	ORF5_334	807342	807779	-	145	ORF5_334	Predicted ORF	-	-	-	-	-	-	-	-	-	-	-	-	-	-	-	-	-	-	-	-	-	-	-	-	-	-	-	-	-	-	-	-
470	ORF5_335	808072	808593	+	173	ORF5_335	Predicted ORF	-	-	-	-	-	-	-	-	-	-	-	-	-	-	-	-	-	-	-	-	-	-	-	-	-	-	-	-	-	-	-	-
471	ORF5_336	809172	810560	+	462	ORF5_336	Predicted ORF	-	-	-	-	-	-	-	-	-	-	-	-	-	-	-	-	-	-	-	-	-	-	-	-	-	-	-	-	-	-	-	-
472	ORF5_337	811068	812279	-	403	ORF5_337	Predicted ORF	-	-	-	-	-	-	-	-	-	-	-	-	-	-	-	-	-	-	-	-	-	-	-	-	-	-	-	-	-	-	-	-
473	ORF5_338	812314	813525	-	403	ORF5_338	Predicted ORF	-	-	-	-	-	-	-	-	-	-	-	-	-	-	-	-	-	-	-	-	-	-	-	-	-	-	-	-	-	-	-	-
474	ORF5_340	815306	815698	-	130	ORF5_340	Predicted ORF	-	-	-	-	-	-	-	-	-	-	-	-	-	-	-	-	-	-	-	-	-	-	-	-	-	-	-	-	-	-	-	-
475	ORF5_341	815703	816833	-	376	ORF5_341	Predicted ORF;Prophage|Prophage_113200701 NC_008296 197 gp197 {Phage Syn9}	-	-	-	-	-	-	-	-	-	-	-	-	Prophage_66391516	0.556	-	-	-	-	-	-	-	-	-	-	-	-	-	-	-	-	-	-
476	ORF5_342	816902	819187	-	761	ORF5_342	Predicted ORF;Prophage|Prophage_113200700 NC_008296 196 gp196 {Phage Syn9}	-	-	-	-	-	-	-	-	-	-	-	-	Prophage_61806079	0.545	-	-	-	-	-	-	-	-	-	-	-	-	-	-	-	-	-	-
477	ORF5_343	819506	819880	+	124	ORF5_343	Predicted ORF	-	-	-	-	-	-	-	-	-	-	-	-	-	-	-	-	-	-	-	-	-	-	-	-	-	-	-	-	-	-	-	-
478	ORF5_347	824142	824561	-	139	ORF5_347	Predicted ORF	-	-	-	-	-	-	-	-	-	-	-	-	-	-	-	-	-	-	-	-	-	-	-	-	-	-	-	-	-	-	-	-
479	ORF5_351	829006	830307	+	433	ORF5_351	Predicted ORF	-	-	-	-	-	-	-	-	-	-	-	-	-	-	-	-	-	-	-	-	-	-	-	-	-	-	-	-	-	-	-	-
480	ORF5_352	830615	831295	+	226	ORF5_352	Predicted ORF	-	-	-	-	-	-	-	-	-	-	-	-	-	-	-	-	-	-	-	-	-	-	-	-	-	-	-	-	-	-	-	-
481	ORF5_353	831446	833116	+	556	ORF5_353	Predicted ORF	-	-	-	-	-	-	-	-	-	-	-	-	-	-	-	-	-	-	-	-	-	-	-	-	-	-	-	-	-	-	-	-
482	ORF5_355	833633	833947	+	104	ORF5_355	Predicted ORF	-	-	-	-	-	-	-	-	-	-	-	-	-	-	-	-	-	-	-	-	-	-	-	-	-	-	-	-	-	-	-	-
483	ORF5_356	833947	835116	+	389	ORF5_356	Predicted ORF	-	-	-	-	-	-	-	-	-	-	-	-	-	-	-	-	-	-	-	-	-	-	-	-	-	-	-	-	-	-	-	-
484	ORF5_357	835106	835243	+	45	ORF5_357	Predicted ORF	-	-	-	-	-	-	-	-	-	-	-	-	-	-	-	-	-	-	-	-	-	-	-	-	-	-	-	-	-	-	-	-
485	ORF5_358	835271	835978	+	235	ORF5_358	Predicted ORF	-	-	-	-	-	-	-	-	-	-	-	-	-	-	-	-	-	-	-	-	-	-	-	-	-	-	-	-	-	-	-	-
486	ORF5_359	836020	836343	+	107	ORF5_359	Predicted ORF	-	-	-	-	-	-	-	-	-	-	-	-	-	-	-	-	-	-	-	-	-	-	-	-	-	-	-	-	-	-	-	-
487	ORF5_360	836518	837051	-	177	ORF5_360	Predicted ORF	-	-	-	-	-	-	-	-	-	-	-	-	-	-	-	-	-	-	-	-	-	-	-	-	-	-	-	-	-	-	-	-
488	ORF5_361	837576	837953	+	125	ORF5_361	Predicted ORF	-	-	-	-	-	-	-	-	-	-	-	-	-	-	-	-	-	-	-	-	-	-	-	-	-	-	-	-	-	-	-	-
489	ORF5_363	838645	839628	-	327	ORF5_363	Predicted ORF	-	-	-	-	-	-	-	-	-	-	-	-	-	-	-	-	-	-	-	-	-	-	-	-	-	-	-	-	-	-	-	-
490	ORF5_365	840934	841533	-	199	ORF5_365	Predicted ORF	-	-	-	-	-	-	-	-	-	-	-	-	-	-	-	-	-	-	-	-	-	-	-	-	-	-	-	-	-	-	-	-
491	ORF5_367	843014	843736	+	240	ORF5_367	Predicted ORF	-	-	-	-	-	-	-	-	-	-	-	-	-	-	-	-	-	-	-	-	-	-	-	-	-	-	-	-	-	-	-	-
492	ORF5_368	843852	844394	+	180	ORF5_368	Predicted ORF	-	-	-	-	-	-	-	-	-	-	-	-	-	-	-	-	-	-	-	-	-	-	-	-	-	-	-	-	-	-	-	-
493	ORF6_1	844705	845358	-	217	ORF6_1	Predicted ORF	-	-	-	-	-	-	-	-	-	-	-	-	-	-	-	-	-	-	-	-	-	-	-	-	-	-	-	-	-	-	-	-
494	ORF6_2	845574	846410	+	278	ORF6_2	Predicted ORF	-	-	-	-	-	-	-	-	-	-	-	-	-	-	-	-	-	-	-	-	-	-	-	-	-	-	-	-	-	-	-	-
495	ORF6_3	846649	847923	+	424	ORF6_3	Predicted ORF	-	-	-	-	-	-	-	-	-	-	-	-	-	-	-	-	-	-	-	-	-	-	-	-	-	-	-	-	-	-	-	-
496	ORF6_4	848626	849399	+	257	ORF6_4	Predicted ORF	-	-	-	-	-	-	-	-	-	-	-	-	-	-	-	-	-	-	-	-	-	-	-	-	-	-	-	-	-	-	-	-
497	ORF6_5	849529	850860	+	443	ORF6_5	Predicted ORF	-	-	-	-	-	-	-	-	-	-	-	-	-	-	-	-	-	-	-	-	-	-	-	-	-	-	-	-	-	-	-	-
498	ORF6_6	850877	852094	+	405	ORF6_6	Predicted ORF	-	-	-	-	-	-	-	-	-	-	-	-	-	-	-	-	-	-	-	-	-	-	-	-	-	-	-	-	-	-	-	-
499	ORF6_7	852166	852885	+	239	ORF6_7	Predicted ORF	-	-	-	-	-	-	-	-	-	-	-	-	-	-	-	-	-	-	-	-	-	-	-	-	-	-	-	-	-	-	-	-
500	ORF6_8	853017	853727	-	236	ORF6_8	Predicted ORF	-	-	-	-	-	-	-	-	-	-	-	-	-	-	-	-	-	-	-	-	-	-	-	-	-	-	-	-	-	-	-	-
501	ORF6_9	854185	855162	+	325	ORF6_9	Predicted ORF	-	-	-	-	-	-	-	-	-	-	-	-	-	-	-	-	-	-	-	-	-	-	-	-	-	-	-	-	-	-	-	-
502	ORF6_10	855303	857714	-	803	ORF6_10	Predicted ORF	-	-	-	-	-	-	-	-	-	-	-	-	-	-	-	-	-	-	-	-	-	-	-	-	-	-	-	-	-	-	-	-
503	ORF6_11	857865	859244	+	459	ORF6_11	Predicted ORF	-	-	-	-	-	-	-	-	-	-	-	-	-	-	-	-	-	-	-	-	-	-	-	-	-	-	-	-	-	-	-	-
504	ORF6_12	859374	859466	-	30	ORF6_12	Predicted ORF	-	-	-	-	-	-	-	-	-	-	-	-	-	-	-	-	-	-	-	-	-	-	-	-	-	-	-	-	-	-	-	-
505	ORF6_13	859585	859692	-	35	ORF6_13	Predicted ORF	-	-	-	-	-	-	-	-	-	-	-	-	-	-	-	-	-	-	-	-	-	-	-	-	-	-	-	-	-	-	-	-
506	ORF6_16	864025	864375	+	116	ORF6_16	Predicted ORF	-	-	-	-	-	-	-	-	-	-	-	-	-	-	-	-	-	-	-	-	-	-	-	-	-	-	-	-	-	-	-	-
507	ORF6_17	864516	865025	-	169	ORF6_17	Predicted ORF	-	-	-	-	-	-	-	-	-	-	-	-	-	-	-	-	-	-	-	-	-	-	-	-	-	-	-	-	-	-	-	-
508	ORF6_22	868590	869567	+	325	ORF6_22	Predicted ORF	-	-	-	-	-	-	-	-	-	-	-	-	-	-	-	-	-	-	-	-	-	-	-	-	-	-	-	-	-	-	-	-
509	ORF6_25	872227	872979	+	250	ORF6_25	Predicted ORF;PAI|PAI_AAO17225 Orf71	-	-	-	-	-	-	-	-	-	-	-	-	-	-	-	-	-	-	-	-	-	-	-	-	-	-	-	-	PAI_AAO17225	0.432	-	-
510	ORF6_26	872942	873409	-	155	ORF6_26	Predicted ORF;Prophage|Prophage_46401827 NC_005859 rnh putative RNaseH ribonuclease {Enterobacteria phage T5}	-	-	-	-	-	-	-	-	-	-	-	-	Prophage_82701057	0.452	-	-	-	-	-	-	-	-	-	-	-	-	-	-	PAI_AAO17224	0.716	-	-
511	ORF6_28	874285	875736	+	483	ORF6_28	Predicted ORF	-	-	-	-	-	-	-	-	-	-	-	-	-	-	-	-	-	-	-	-	-	-	-	-	-	-	-	-	-	-	-	-
512	ORF7_1	876047	876607	-	186	ORF7_1	Predicted ORF	-	-	-	-	-	-	-	-	-	-	-	-	-	-	-	-	-	-	-	-	-	-	-	-	-	-	-	-	-	-	-	-
513	ORF7_2	876836	877195	-	119	ORF7_2	Predicted ORF	-	-	-	-	-	-	-	-	-	-	-	-	-	-	-	-	-	-	-	-	-	-	-	-	-	-	-	-	-	-	-	-
514	ORF7_3	877208	877606	-	132	ORF7_3	Predicted ORF	-	-	-	-	-	-	-	-	-	-	-	-	-	-	-	-	-	-	-	-	-	-	-	-	-	-	-	-	-	-	-	-
515	ORF7_4	877615	878349	-	244	ORF7_4	Predicted ORF	-	-	-	-	-	-	-	-	-	-	-	-	-	-	-	-	-	-	-	-	-	-	-	-	-	-	-	-	-	-	-	-
516	ORF7_5	878349	880142	-	597	ORF7_5	Predicted ORF	-	-	-	-	-	-	-	-	-	-	-	-	-	-	-	-	-	-	-	-	-	-	-	-	-	-	-	-	-	-	-	-
517	ORF7_7	881797	885150	-	1117	ORF7_7	Predicted ORF	-	-	-	-	-	-	-	-	-	-	-	-	-	-	-	-	-	-	-	-	-	-	-	-	-	-	-	-	-	-	-	-
518	ORF7_8	885228	886148	-	306	ORF7_8	Predicted ORF	-	-	-	-	-	-	-	-	-	-	-	-	-	-	-	-	-	-	-	-	-	-	-	-	-	-	-	-	-	-	-	-
519	ORF7_9	886478	887572	-	364	ORF7_9	Predicted ORF	-	-	-	-	-	-	-	-	-	-	-	-	-	-	-	-	-	-	-	-	-	-	-	-	-	-	-	-	-	-	-	-
520	ORF7_10	887608	888153	+	181	ORF7_10	Predicted ORF	-	-	-	-	-	-	-	-	-	-	-	-	-	-	-	-	-	-	-	-	-	-	-	-	-	-	-	-	-	-	-	-
521	ORF7_11	889326	890486	-	386	ORF7_11	Predicted ORF	-	-	-	-	-	-	-	-	-	-	-	-	-	-	-	-	-	-	-	-	-	-	-	-	-	-	-	-	-	-	-	-
522	ORF7_12	890521	892161	+	546	ORF7_12	Predicted ORF	-	-	-	-	-	-	-	-	-	-	-	-	-	-	-	-	-	-	-	-	-	-	-	-	-	-	-	-	-	-	-	-
523	ORF7_13	892189	892653	+	154	ORF7_13	Predicted ORF	-	-	-	-	-	-	-	-	-	-	-	-	-	-	-	-	-	-	-	-	-	-	-	-	-	-	-	-	-	-	-	-
524	ORF7_15	894815	896866	+	683	ORF7_15	Predicted ORF	-	-	-	-	-	-	-	-	-	-	-	-	-	-	-	-	-	-	-	-	-	-	-	-	-	-	-	-	-	-	-	-
525	ORF7_16	896889	897785	+	298	ORF7_16	Predicted ORF	-	-	-	-	-	-	-	-	-	-	-	-	-	-	-	-	-	-	-	-	-	-	-	-	-	-	-	-	-	-	-	-
526	ORF7_17	897876	898169	+	97	ORF7_17	Predicted ORF	-	-	-	-	-	-	-	-	-	-	-	-	-	-	-	-	-	-	-	-	-	-	-	-	-	-	-	-	-	-	-	-
527	ORF7_18	898193	899491	+	432	ORF7_18	Predicted ORF	-	-	-	-	-	-	-	-	-	-	-	-	-	-	-	-	-	-	-	-	-	-	-	-	-	-	-	-	-	-	-	-
528	ORF7_19	899534	900736	+	400	ORF7_19	Predicted ORF	-	-	-	-	-	-	-	-	-	-	-	-	-	-	-	-	-	-	-	-	-	-	-	-	-	-	-	-	-	-	-	-
529	ORF7_20	900739	901638	+	299	ORF7_20	Predicted ORF	-	-	-	-	-	-	-	-	-	-	-	-	-	-	-	-	-	-	-	-	-	-	-	-	-	-	-	-	-	-	-	-
530	ORF7_21	901762	901950	+	62	ORF7_21	Predicted ORF	-	-	-	-	-	-	-	-	-	-	-	-	-	-	-	-	-	-	-	-	-	-	-	-	-	-	-	-	-	-	-	-
531	ORF7_24	904339	905526	-	395	ORF7_24	Predicted ORF	-	-	-	-	-	-	-	-	-	-	-	-	-	-	-	-	-	-	-	-	-	-	-	-	-	-	-	-	-	-	-	-
532	ORF7_25	905703	906131	+	142	ORF7_25	Predicted ORF	-	-	-	-	-	-	-	-	-	-	-	-	-	-	-	-	-	-	-	-	-	-	-	-	-	-	-	-	-	-	-	-
533	ORF7_28	909757	910143	+	128	ORF7_28	Predicted ORF	-	-	-	-	-	-	-	-	-	-	-	-	-	-	-	-	-	-	-	-	-	-	-	-	-	-	-	-	-	-	-	-
534	ORF7_29	910152	910499	+	115	ORF7_29	Predicted ORF	-	-	-	-	-	-	-	-	-	-	-	-	-	-	-	-	-	-	-	-	-	-	-	-	-	-	-	-	-	-	-	-
535	ORF7_30	910474	910701	+	75	ORF7_30	Predicted ORF	-	-	-	-	-	-	-	-	-	-	-	-	-	-	-	-	-	-	-	-	-	-	-	-	-	-	-	-	-	-	-	-
536	ORF7_31	910745	911197	+	150	ORF7_31	Predicted ORF	-	-	-	-	-	-	-	-	-	-	-	-	-	-	-	-	-	-	-	-	-	-	-	-	-	-	-	-	-	-	-	-
537	ORF7_32	911367	912767	+	466	ORF7_32	Predicted ORF;PAI|PAI_CAI36044 replicative DNA helicase DnaB	-	-	-	-	-	-	-	-	-	-	-	-	Prophage_46401697	0.725	-	-	-	-	-	-	-	-	-	-	-	-	-	-	PAI_CAF28476	0.504	-	-
538	ORF7_34	914002	914736	-	244	ORF7_34	Predicted ORF	-	-	-	-	-	-	-	-	-	-	-	-	-	-	-	-	-	-	-	-	-	-	-	-	-	-	-	-	-	-	-	-
539	ORF7_35	914972	916621	+	549	ORF7_35	Predicted ORF;	-	-	-	-	-	-	-	-	-	-	-	-	-	-	-	-	-	-	-	-	-	-	-	-	-	-	-	-	-	-	ARI_484356528	0.455
540	ORF7_38	918782	919009	+	75	ORF7_38	Predicted ORF	-	-	-	-	-	-	-	-	-	-	-	-	-	-	-	-	-	-	-	-	-	-	-	-	-	-	-	-	-	-	-	-
541	ORF7_39	919294	919740	+	148	ORF7_39	Predicted ORF	-	-	-	-	-	-	-	-	-	-	-	-	-	-	-	-	-	-	-	-	-	-	-	-	-	-	-	-	-	-	-	-
542	ORF7_40	919828	920445	+	205	ORF7_40	Predicted ORF	-	-	-	-	-	-	-	-	-	-	-	-	-	-	-	-	-	-	-	-	-	-	-	-	-	-	-	-	-	-	-	-
543	ORF7_41	920731	922536	+	601	ORF7_41	Predicted ORF	-	-	-	-	-	-	-	-	-	-	-	-	-	-	-	-	-	-	-	-	-	-	-	-	-	-	-	-	-	-	-	-
544	ORF7_42	922536	924266	+	576	ORF7_42	Predicted ORF	-	-	-	-	-	-	-	-	-	-	-	-	-	-	-	-	-	-	-	-	-	-	-	-	-	-	-	-	-	-	-	-
545	ORF7_43	924297	925106	+	269	ORF7_43	Predicted ORF	-	-	-	-	-	-	-	-	-	-	-	-	-	-	-	-	-	-	-	-	-	-	-	-	-	-	-	-	-	-	-	-
546	ORF7_44	925364	925573	+	69	ORF7_44	Predicted ORF;PAI|PAI_AAO18076 unknown	-	-	-	-	-	-	-	-	-	-	-	-	Prophage_13095918	0.493	-	-	-	-	-	-	-	-	-	-	-	-	-	-	PAI_AAO18076	0.493	-	-
547	ORF7_45	925670	926290	-	206	ORF7_45	Predicted ORF;	-	-	-	-	-	-	-	-	-	-	-	-	-	-	-	-	-	-	-	-	-	-	-	-	-	-	-	-	-	-	ARI_484355512	0.437
548	ORF7_47	927570	929543	-	657	ORF7_47	Predicted ORF	-	-	-	-	-	-	-	-	-	-	-	-	-	-	-	-	-	-	-	-	-	-	-	-	-	-	-	-	-	-	-	-
549	ORF7_48	929861	931282	+	473	ORF7_48	Predicted ORF	-	-	-	-	-	-	-	-	-	-	-	-	-	-	-	-	-	-	-	-	-	-	-	-	-	-	-	-	-	-	-	-
550	ORF7_49	931292	932200	+	302	ORF7_49	Predicted ORF	-	-	-	-	-	-	-	-	-	-	-	-	-	-	-	-	-	-	-	-	-	-	-	-	-	-	-	-	-	-	-	-
551	ORF7_52	934451	935206	+	251	ORF7_52	Predicted ORF	-	-	-	-	-	-	-	-	-	-	-	-	-	-	-	-	-	-	-	-	-	-	-	-	-	-	-	-	-	-	-	-
552	ORF7_53	935462	936346	-	294	ORF7_53	Predicted ORF	-	-	-	-	-	-	-	-	-	-	-	-	-	-	-	-	-	-	-	-	-	-	-	-	-	-	-	-	-	-	-	-
553	ORF7_55	938011	938220	+	69	ORF7_55	Predicted ORF	-	-	-	-	-	-	-	-	-	-	-	-	-	-	-	-	-	-	-	-	-	-	-	-	-	-	-	-	-	-	-	-
554	ORF7_57	939954	940595	-	213	ORF7_57	Predicted ORF	-	-	-	-	-	-	-	-	-	-	-	-	-	-	-	-	-	-	-	-	-	-	-	-	-	-	-	-	-	-	-	-
555	ORF7_58	940763	942457	+	564	ORF7_58	Predicted ORF	-	-	-	-	-	-	-	-	-	-	-	-	-	-	-	-	-	-	-	-	-	-	-	-	-	-	-	-	-	-	-	-
556	ORF7_59	942454	946344	+	1296	ORF7_59	Predicted ORF	-	-	-	-	-	-	-	-	-	-	-	-	-	-	-	-	-	-	-	-	-	-	-	-	-	-	-	-	-	-	-	-
557	ORF7_60	946449	946976	-	175	ORF7_60	Predicted ORF	-	-	-	-	-	-	-	-	-	-	-	-	-	-	-	-	-	-	-	-	-	-	-	-	-	-	-	-	-	-	-	-
558	ORF7_61	947140	948156	-	338	ORF7_61	Predicted ORF	-	-	-	-	-	-	-	-	-	-	-	-	-	-	-	-	-	-	-	-	-	-	-	-	-	-	-	-	-	-	-	-
559	ORF7_62	948337	949701	+	454	ORF7_62	Predicted ORF	-	-	-	-	-	-	-	-	-	-	-	-	-	-	-	-	-	-	-	-	-	-	-	-	-	-	-	-	-	-	-	-
560	ORF7_63	949954	951411	+	485	ORF7_63	Predicted ORF	-	-	-	-	-	-	-	-	-	-	-	-	-	-	-	-	-	-	-	-	-	-	-	-	-	-	-	-	-	-	-	-
561	ORF7_64	951530	951976	-	148	ORF7_64	Predicted ORF	-	-	-	-	-	-	-	-	-	-	-	-	-	-	-	-	-	-	-	-	-	-	-	-	-	-	-	-	-	-	-	-
562	ORF7_65	952101	952574	-	157	ORF7_65	Predicted ORF	-	-	-	-	-	-	-	-	-	-	-	-	-	-	-	-	-	-	-	-	-	-	-	-	-	-	-	-	-	-	-	-
563	ORF7_66	952673	953440	+	255	ORF7_66	Predicted ORF	-	-	-	-	-	-	-	-	-	-	-	-	-	-	-	-	-	-	-	-	-	-	-	-	-	-	-	-	-	-	-	-
564	ORF7_67	953571	954512	+	313	ORF7_67	Predicted ORF	-	-	-	-	-	-	-	-	-	-	-	-	-	-	-	-	-	-	-	-	-	-	-	-	-	-	-	-	-	-	-	-
565	ORF7_68	954743	955711	-	322	ORF7_68	Predicted ORF	-	-	-	-	-	-	-	-	-	-	-	-	-	-	-	-	-	-	-	-	-	-	-	-	-	-	-	-	-	-	-	-
566	ORF7_69	955973	956284	+	103	ORF7_69	Predicted ORF	-	-	-	-	-	-	-	-	-	-	-	-	-	-	-	-	-	-	-	-	-	-	-	-	-	-	-	-	-	-	-	-
567	ORF7_70	956303	956560	+	85	ORF7_70	Predicted ORF	-	-	-	-	-	-	-	-	-	-	-	-	-	-	-	-	-	-	-	-	-	-	-	-	-	-	-	-	-	-	-	-
568	ORF7_71	956638	957591	+	317	ORF7_71	Predicted ORF	-	-	-	-	-	-	-	-	-	-	-	-	-	-	-	-	-	-	-	-	-	-	-	-	-	-	-	-	-	-	-	-
569	ORF7_72	957621	958802	+	393	ORF7_72	Predicted ORF	-	-	-	-	-	-	-	-	-	-	-	-	-	-	-	-	-	-	-	-	-	-	-	-	-	-	-	-	-	-	-	-
570	ORF7_73	958968	959750	+	260	ORF7_73	Predicted ORF	-	-	-	-	-	-	-	-	-	-	-	-	-	-	-	-	-	-	-	-	-	-	-	-	-	-	-	-	-	-	-	-
571	ORF7_74	959747	960211	+	154	ORF7_74	Predicted ORF	-	-	-	-	-	-	-	-	-	-	-	-	-	-	-	-	-	-	-	-	-	-	-	-	-	-	-	-	-	-	-	-
572	ORF7_77	961735	962127	-	130	ORF7_77	Predicted ORF	-	-	-	-	-	-	-	-	-	-	-	-	-	-	-	-	-	-	-	-	-	-	-	-	-	-	-	-	-	-	-	-
573	ORF7_78	962155	962991	-	278	ORF7_78	Predicted ORF;AR|AR_YP_001333738 dimethyladenosine transferase	-	-	AR_ZP_02659903	0.734	-	-	-	-	-	-	-	-	-	-	-	-	-	-	-	-	-	-	-	-	-	-	-	-	-	-	-	-
574	ORF7_79	962988	963983	-	331	ORF7_79	Predicted ORF	-	-	-	-	-	-	-	-	-	-	-	-	-	-	-	-	-	-	-	-	-	-	-	-	-	-	-	-	-	-	-	-
575	ORF7_80	964055	965356	-	433	ORF7_80	Predicted ORF	-	-	-	-	-	-	-	-	-	-	-	-	-	-	-	-	-	-	-	-	-	-	-	-	-	-	-	-	-	-	-	-
576	ORF7_81	965419	967743	-	774	ORF7_81	Predicted ORF	-	-	-	-	-	-	-	-	-	-	-	-	-	-	-	-	-	-	-	-	-	-	-	-	-	-	-	-	-	-	-	-
577	ORF7_82	967974	968795	+	273	ORF7_82	Predicted ORF	-	-	-	-	-	-	-	-	-	-	-	-	-	-	-	-	-	-	-	-	-	-	-	-	-	-	-	-	-	-	-	-
578	ORF7_83	968907	971117	-	736	ORF7_83	Predicted ORF	-	-	-	-	-	-	-	-	-	-	-	-	-	-	-	-	-	-	-	-	-	-	-	-	-	-	-	-	-	-	-	-
579	ORF7_84	971465	972223	-	252	ORF7_84	Predicted ORF	-	-	-	-	-	-	-	-	-	-	-	-	-	-	-	-	-	-	-	-	-	-	-	-	-	-	-	-	-	-	-	-
580	ORF7_85	972631	973674	+	347	ORF7_85	Predicted ORF	-	-	-	-	-	-	-	-	-	-	-	-	-	-	-	-	-	-	-	-	-	-	-	-	-	-	-	-	-	-	-	-
581	ORF7_88	976217	976984	-	255	ORF7_88	Predicted ORF	-	-	-	-	-	-	-	-	-	-	-	-	-	-	-	-	-	-	-	-	-	-	-	-	-	-	-	-	-	-	-	-
582	ORF7_91	981779	982528	+	249	ORF7_91	Predicted ORF	-	-	-	-	-	-	-	-	-	-	-	-	-	-	-	-	-	-	-	-	-	-	-	-	-	-	-	-	-	-	-	-
583	ORF7_92	982560	983465	+	301	ORF7_92	Predicted ORF	-	-	-	-	-	-	-	-	-	-	-	-	-	-	-	-	-	-	-	-	-	-	-	-	-	-	-	-	-	-	-	-
584	ORF7_94	984591	985181	+	196	ORF7_94	Predicted ORF	-	-	-	-	-	-	-	-	-	-	-	-	-	-	-	-	-	-	-	-	-	-	-	-	-	-	-	-	-	-	-	-
585	ORF7_99	987650	989059	-	469	ORF7_99	Predicted ORF	-	-	-	-	-	-	-	-	-	-	-	-	-	-	-	-	-	-	-	-	-	-	-	-	-	-	-	-	-	-	-	-
586	ORF7_102	992213	992737	+	174	ORF7_102	Predicted ORF	-	-	-	-	-	-	-	-	-	-	-	-	-	-	-	-	-	-	-	-	-	-	-	-	-	-	-	-	-	-	-	-
587	ORF7_103	992734	993840	+	368	ORF7_103	Predicted ORF	-	-	-	-	-	-	-	-	-	-	-	-	-	-	-	-	-	-	-	-	-	-	-	-	-	-	-	-	-	-	-	-
588	ORF7_105	996203	997927	+	574	ORF7_105	Predicted ORF	-	-	-	-	-	-	-	-	-	-	-	-	-	-	-	-	-	-	-	-	-	-	-	-	-	-	-	-	-	-	-	-
589	ORF7_106	997927	998421	+	164	ORF7_106	Predicted ORF	-	-	-	-	-	-	-	-	-	-	-	-	-	-	-	-	-	-	-	-	-	-	-	-	-	-	-	-	-	-	-	-
590	ORF7_107	998508	999194	-	228	ORF7_107	Predicted ORF	-	-	-	-	-	-	-	-	-	-	-	-	-	-	-	-	-	-	-	-	-	-	-	-	-	-	-	-	-	-	-	-
591	ORF7_109	1000747	1001760	-	337	ORF7_109	Predicted ORF;Prophage|Prophage_41057380 NC_005340 similar to P2 Int putative integrase orf27 {Enterobacteria phage PsP3}	-	-	-	-	-	-	-	-	-	-	-	-	Prophage_9634085	0.623	-	-	-	-	-	-	-	-	-	-	-	-	-	-	-	-	-	-
592	ORF7_110	1001786	1002505	-	239	ORF7_110	Predicted ORF	-	-	-	-	-	-	-	-	-	-	-	-	-	-	-	-	-	-	-	-	-	-	-	-	-	-	-	-	-	-	-	-
593	ORF7_112	1003251	1003487	+	78	ORF7_112	Predicted ORF	-	-	-	-	-	-	-	-	-	-	-	-	-	-	-	-	-	-	-	-	-	-	-	-	-	-	-	-	-	-	-	-
594	ORF7_113	1003524	1004036	+	170	ORF7_113	Predicted ORF;Prophage|Prophage_148727135 NC_009542 cII putative cII protein {Phage phiO18P}	-	-	-	-	-	-	-	-	-	-	-	-	Prophage_9634088	0.624	-	-	-	-	-	-	-	-	-	-	-	-	-	-	-	-	-	-
595	ORF7_114	1004048	1004554	+	168	ORF7_114	Predicted ORF;Prophage|Prophage_30065737 NC_004745 B gpB {Yersinia phage L-413C}	-	-	-	-	-	-	-	-	-	-	-	-	Prophage_9630361	0.446	-	-	-	-	-	-	-	-	-	-	-	-	-	-	-	-	-	-
596	ORF7_115	1004629	1004883	+	84	ORF7_115	Predicted ORF	-	-	-	-	-	-	-	-	-	-	-	-	-	-	-	-	-	-	-	-	-	-	-	-	-	-	-	-	-	-	-	-
597	ORF7_116	1004886	1005053	+	55	ORF7_116	Predicted ORF	-	-	-	-	-	-	-	-	-	-	-	-	-	-	-	-	-	-	-	-	-	-	-	-	-	-	-	-	-	-	-	-
598	ORF7_117	1005329	1007404	+	691	ORF7_117	Predicted ORF;Prophage|Prophage_17975119 NC_003313 rep rep {Vibrio phage K139}	-	-	-	-	-	-	-	-	-	-	-	-	Prophage_9634096	0.537	-	-	-	-	-	-	-	-	-	-	-	-	-	-	-	-	-	-
599	ORF7_118	1007416	1007994	+	192	ORF7_118	Predicted ORF;Prophage|Prophage_66392076 NC_007024 possible endodeoxyribonuclease {Xanthomonas phage Xp15}	-	-	-	-	-	-	-	-	-	-	-	-	Prophage_33770559	0.51	-	-	-	-	-	-	-	-	-	-	-	-	-	-	-	-	-	-
600	ORF7_119	1008138	1008329	+	63	ORF7_119	Predicted ORF	-	-	-	-	-	-	-	-	-	-	-	-	-	-	-	-	-	-	-	-	-	-	-	-	-	-	-	-	-	-	-	-
601	ORF7_120	1008340	1008576	+	78	ORF7_120	Predicted ORF;Prophage|Prophage_9634100 NC_001317 tum bacteriophage 186 Tum95.5 {Enterobacteria phage 186}	-	-	-	-	-	-	-	-	-	-	-	-	Prophage_33770564	0.461	-	-	-	-	-	-	-	-	-	-	-	-	-	-	-	-	-	-
602	ORF7_121	1008906	1009277	-	123	ORF7_121	Predicted ORF	-	-	-	-	-	-	-	-	-	-	-	-	-	-	-	-	-	-	-	-	-	-	-	-	-	-	-	-	-	-	-	-
603	ORF7_122	1009300	1010364	-	354	ORF7_122	Predicted ORF;Prophage|Prophage_134288732 NC_009236 gp5 phage portal protein pbsx family {Burkholderia phage phiE12-2}	-	-	-	-	-	-	-	-	-	-	-	-	Prophage_145708079	0.661	-	-	-	-	-	-	-	-	-	-	-	-	-	-	-	-	-	-
604	ORF7_123	1010368	1012086	-	572	ORF7_123	Predicted ORF;Prophage|Prophage_33438899 NC_005056 similar to P2 P large terminase subunit {Enterobacteria phage WPhi}	-	-	-	-	-	-	-	-	-	-	-	-	Prophage_145708080	0.657	-	-	-	-	-	-	-	-	-	-	-	-	-	-	-	-	-	-
605	ORF7_124	1012279	1013106	+	275	ORF7_124	Predicted ORF;Prophage|Prophage_134288713 NC_009236 gp3 phage capsid scaffolding protein (GPO) {Burkholderia phage phiE12-2}	-	-	-	-	-	-	-	-	-	-	-	-	Prophage_134288755	0.476	-	-	-	-	-	-	-	-	-	-	-	-	-	-	-	-	-	-
606	ORF7_125	1013122	1014189	+	355	ORF7_125	Predicted ORF;Prophage|Prophage_33438901 NC_005056 similar to P2 N major capsid protein precursor {Enterobacteria phage WPhi}	-	-	-	-	-	-	-	-	-	-	-	-	Prophage_9630331	0.608	-	-	-	-	-	-	-	-	-	-	-	-	-	-	-	-	-	-
607	ORF7_126	1014192	1014851	+	219	ORF7_126	Predicted ORF;Prophage|Prophage_9630332 NC_001895 M gpM {Enterobacteria phage P2}	-	-	-	-	-	-	-	-	-	-	-	-	Prophage_9630332	0.502	-	-	-	-	-	-	-	-	-	-	-	-	-	-	-	-	-	-
608	ORF7_127	1014947	1015411	+	154	ORF7_127	Predicted ORF;Prophage|Prophage_33438903 NC_005056 similar to P2 L capsid completion protein {Enterobacteria phage WPhi}	-	-	-	-	-	-	-	-	-	-	-	-	Prophage_9630333	0.442	-	-	-	-	-	-	-	-	-	-	-	-	-	-	-	-	-	-
609	ORF7_128	1015411	1015614	+	67	ORF7_128	Predicted ORF;Prophage|Prophage_9630334 NC_001895 X gpX {Enterobacteria phage P2}	-	-	-	-	-	-	-	-	-	-	-	-	Prophage_9630334	0.582	-	-	-	-	-	-	-	-	-	-	-	-	-	-	-	-	-	-
610	ORF7_129	1015618	1015833	+	71	ORF7_129	Predicted ORF	-	-	-	-	-	-	-	-	-	-	-	-	-	-	-	-	-	-	-	-	-	-	-	-	-	-	-	-	-	-	-	-
611	ORF7_132	1016851	1017285	+	144	ORF7_132	Predicted ORF;Prophage|Prophage_33438910 NC_005056 similar to P2 R tail completion protein {Enterobacteria phage WPhi}	-	-	-	-	-	-	-	-	-	-	-	-	Prophage_9630339	0.493	-	-	-	-	-	-	-	-	-	-	-	-	-	-	-	-	-	-
612	ORF7_133	1017260	1017724	+	154	ORF7_133	Predicted ORF;Prophage|Prophage_30065717 NC_004745 S gpS {Yersinia phage L-413C}	-	-	-	-	-	-	-	-	-	-	-	-	Prophage_9634069	0.455	-	-	-	-	-	-	-	-	-	-	-	-	-	-	-	-	-	-
613	ORF7_134	1017805	1018365	+	186	ORF7_134	Predicted ORF;Prophage|Prophage_33438912 NC_005056 similar to P2 V baseplate protein {Enterobacteria phage WPhi}	-	-	-	-	-	-	-	-	-	-	-	-	Prophage_41057367	0.488	-	-	-	-	-	-	-	-	-	-	-	-	-	-	-	-	-	-
614	ORF7_135	1018362	1018709	+	115	ORF7_135	Predicted ORF;Prophage|Prophage_33438913 NC_005056 similar to P2 W putative baseplate protein {Enterobacteria phage WPhi}	-	-	-	-	-	-	-	-	-	-	-	-	Prophage_9634071	0.548	-	-	-	-	-	-	-	-	-	-	-	-	-	-	-	-	-	-
615	ORF7_136	1018709	1019617	+	302	ORF7_136	Predicted ORF;Prophage|Prophage_33438914 NC_005056 similar to P2 J putative baseplate assembly protein {Enterobacteria phage WPhi}	-	-	-	-	-	-	-	-	-	-	-	-	Prophage_9634072	0.659	-	-	-	-	-	-	-	-	-	-	-	-	-	-	-	-	-	-
616	ORF7_137	1019610	1020227	+	205	ORF7_137	Predicted ORF;Prophage|Prophage_30065721 NC_004745 I gpI {Yersinia phage L-413C}	-	-	-	-	-	-	-	-	-	-	-	-	Prophage_145708096	0.532	-	-	-	-	-	-	-	-	-	-	-	-	-	-	-	-	-	-
617	ORF7_140	1022317	1023489	+	390	ORF7_140	Predicted ORF;Prophage|Prophage_17313241 NC_003278 hypothetical protein {Pseudomonas phage phiCTX}	-	-	-	-	-	-	-	-	-	-	-	-	Prophage_41057373	0.678	-	-	-	-	-	-	-	-	-	-	-	-	-	-	-	-	-	-
618	ORF7_141	1023501	1024016	+	171	ORF7_141	Predicted ORF;Prophage|Prophage_33438920 NC_005056 similar to P2 FII tail tube {Enterobacteria phage WPhi}	-	-	-	-	-	-	-	-	-	-	-	-	Prophage_9634077	0.68	-	-	-	-	-	-	-	-	-	-	-	-	-	-	-	-	-	-
619	ORF7_142	1024077	1024421	+	114	ORF7_142	Predicted ORF;Prophage|Prophage_134288780 NC_009234 gp28 phage tail protein E {Burkholderia phage phiE202}	-	-	-	-	-	-	-	-	-	-	-	-	Prophage_134288708	0.456	-	-	-	-	-	-	-	-	-	-	-	-	-	-	-	-	-	-
620	ORF7_143	1024421	1024555	+	44	ORF7_143	Predicted ORF;Prophage|Prophage_9630352 NC_001895 E+E' gpE+E' {Enterobacteria phage P2}	-	-	-	-	-	-	-	-	-	-	-	-	Prophage_30065728	0.523	-	-	-	-	-	-	-	-	-	-	-	-	-	-	-	-	-	-
621	ORF7_145	1027232	1027696	+	154	ORF7_145	Predicted ORF;Prophage|Prophage_9630354 NC_001895 U gpU {Enterobacteria phage P2}	-	-	-	-	-	-	-	-	-	-	-	-	Prophage_41057377	0.535	-	-	-	-	-	-	-	-	-	-	-	-	-	-	-	-	-	-
622	ORF7_146	1027693	1028781	+	362	ORF7_146	Predicted ORF;Prophage|Prophage_33438925 NC_005056 similar to P2 D tail protein {Enterobacteria phage WPhi}	-	-	-	-	-	-	-	-	-	-	-	-	Prophage_9634082	0.569	-	-	-	-	-	-	-	-	-	-	-	-	-	-	-	-	-	-
623	ORF7_147	1028852	1029067	+	71	ORF7_147	Predicted ORF;Prophage|Prophage_9630356 NC_001895 ogr Ogr {Enterobacteria phage P2}	-	-	-	-	-	-	-	-	-	-	-	-	Prophage_30065732	0.521	-	-	-	-	-	-	-	-	-	-	-	-	-	-	-	-	-	-
624	ORF7_149	1030895	1031530	+	211	ORF7_149	Predicted ORF	-	-	-	-	-	-	-	-	-	-	-	-	-	-	-	-	-	-	-	-	-	-	-	-	-	-	-	-	-	-	-	-
625	ORF7_150	1031674	1031895	+	73	ORF7_150	Predicted ORF	-	-	-	-	-	-	-	-	-	-	-	-	-	-	-	-	-	-	-	-	-	-	-	-	-	-	-	-	-	-	-	-
626	ORF7_151	1031916	1032152	+	78	ORF7_151	Predicted ORF	-	-	-	-	-	-	-	-	-	-	-	-	-	-	-	-	-	-	-	-	-	-	-	-	-	-	-	-	-	-	-	-
627	ORF8_1	1032567	1033172	-	201	ORF8_1	Predicted ORF	-	-	-	-	-	-	-	-	-	-	-	-	-	-	-	-	-	-	-	-	-	-	-	-	-	-	-	-	-	-	-	-
628	ORF8_3	1034100	1035059	-	319	ORF8_3	Predicted ORF	-	-	-	-	-	-	-	-	-	-	-	-	-	-	-	-	-	-	-	-	-	-	-	-	-	-	-	-	-	-	-	-
629	ORF8_4	1035081	1035779	-	232	ORF8_4	Predicted ORF	-	-	-	-	-	-	-	-	-	-	-	-	-	-	-	-	-	-	-	-	-	-	-	-	-	-	-	-	-	-	-	-
630	ORF8_5	1036109	1037524	-	471	ORF8_5	Predicted ORF;PAI|PAI_CAF28571 putative oxidoreductase	-	-	-	-	-	-	-	-	-	-	-	-	-	-	-	-	-	-	-	-	-	-	-	-	-	-	-	-	PAI_CAF28571	0.669	-	-
631	ORF8_6	1037542	1042008	-	1488	ORF8_6	Predicted ORF	-	-	-	-	-	-	-	-	-	-	-	-	-	-	-	-	-	-	-	-	-	-	-	-	-	-	-	-	-	-	-	-
632	ORF8_7	1042606	1043532	+	308	ORF8_7	Predicted ORF	-	-	-	-	-	-	-	-	-	-	-	-	-	-	-	-	-	-	-	-	-	-	-	-	-	-	-	-	-	-	-	-
633	ORF8_8	1043588	1044715	+	375	ORF8_8	Predicted ORF	-	-	-	-	-	-	-	-	-	-	-	-	-	-	-	-	-	-	-	-	-	-	-	-	-	-	-	-	-	-	-	-
634	ORF8_12	1049216	1049779	-	187	ORF8_12	Predicted ORF	-	-	-	-	-	-	-	-	-	-	-	-	-	-	-	-	-	-	-	-	-	-	-	-	-	-	-	-	-	-	-	-
635	ORF8_13	1049941	1051686	-	581	ORF8_13	Predicted ORF	-	-	-	-	-	-	-	-	-	-	-	-	-	-	-	-	-	-	-	-	-	-	-	-	-	-	-	-	-	-	-	-
636	ORF8_14	1051906	1052604	+	232	ORF8_14	Predicted ORF	-	-	-	-	-	-	-	-	-	-	-	-	-	-	-	-	-	-	-	-	-	-	-	-	-	-	-	-	-	-	-	-
637	ORF8_15	1053183	1055642	+	819	ORF8_15	Predicted ORF	-	-	-	-	-	-	-	-	-	-	-	-	-	-	-	-	-	-	-	-	-	-	-	-	-	-	-	-	-	-	-	-
638	ORF8_16	1055644	1056591	+	315	ORF8_16	Predicted ORF	-	-	-	-	-	-	-	-	-	-	-	-	-	-	-	-	-	-	-	-	-	-	-	-	-	-	-	-	-	-	-	-
639	ORF8_17	1056595	1057878	+	427	ORF8_17	Predicted ORF	-	-	-	-	-	-	-	-	-	-	-	-	-	-	-	-	-	-	-	-	-	-	-	-	-	-	-	-	-	-	-	-
640	ORF8_18	1058117	1059286	-	389	ORF8_18	Predicted ORF	-	-	-	-	-	-	-	-	-	-	-	-	-	-	-	-	-	-	-	-	-	-	-	-	-	-	-	-	-	-	-	-
641	ORF8_19	1059309	1060484	-	391	ORF8_19	Predicted ORF	-	-	-	-	-	-	-	-	-	-	-	-	-	-	-	-	-	-	-	-	-	-	-	-	-	-	-	-	-	-	-	-
642	ORF8_20	1060713	1061096	-	127	ORF8_20	Predicted ORF;Prophage|Prophage_9632845 NC_000866 vs.6 Vs.6 conserved hypothetical protein {Enterobacteria phage T4}	-	-	-	-	-	-	-	-	-	-	-	-	Prophage_32453604	0.567	-	-	-	-	-	-	-	-	-	-	-	-	-	-	-	-	-	-
643	ORF8_21	1061286	1061600	-	104	ORF8_21	Predicted ORF	-	-	-	-	-	-	-	-	-	-	-	-	-	-	-	-	-	-	-	-	-	-	-	-	-	-	-	-	-	-	-	-
644	ORF8_22	1061794	1062465	+	223	ORF8_22	Predicted ORF	-	-	-	-	-	-	-	-	-	-	-	-	-	-	-	-	-	-	-	-	-	-	-	-	-	-	-	-	-	-	-	-
645	ORF8_23	1062744	1063289	+	181	ORF8_23	Predicted ORF	-	-	-	-	-	-	-	-	-	-	-	-	-	-	-	-	-	-	-	-	-	-	-	-	-	-	-	-	-	-	-	-
646	ORF8_24	1063381	1063560	-	59	ORF8_24	Predicted ORF	-	-	-	-	-	-	-	-	-	-	-	-	-	-	-	-	-	-	-	-	-	-	-	-	-	-	-	-	-	-	-	-
647	ORF8_26	1065196	1066641	+	481	ORF8_26	Predicted ORF	-	-	-	-	-	-	-	-	-	-	-	-	-	-	-	-	-	-	-	-	-	-	-	-	-	-	-	-	-	-	-	-
648	ORF8_27	1066811	1067587	+	258	ORF8_27	Predicted ORF	-	-	-	-	-	-	-	-	-	-	-	-	-	-	-	-	-	-	-	-	-	-	-	-	-	-	-	-	-	-	-	-
649	ORF8_29	1069251	1070039	+	262	ORF8_29	Predicted ORF	-	-	-	-	-	-	-	-	-	-	-	-	-	-	-	-	-	-	-	-	-	-	-	-	-	-	-	-	-	-	-	-
650	ORF8_30	1070318	1071628	+	436	ORF8_30	Predicted ORF	-	-	-	-	-	-	-	-	-	-	-	-	-	-	-	-	-	-	-	-	-	-	-	-	-	-	-	-	-	-	-	-
651	ORF8_31	1071698	1072228	-	176	ORF8_31	Predicted ORF	-	-	-	-	-	-	-	-	-	-	-	-	-	-	-	-	-	-	-	-	-	-	-	-	-	-	-	-	-	-	-	-
652	ORF8_33	1073302	1074000	+	232	ORF8_33	Predicted ORF	-	-	-	-	-	-	-	-	-	-	-	-	-	-	-	-	-	-	-	-	-	-	-	-	-	-	-	-	-	-	-	-
653	ORF8_37	1078561	1078722	-	53	ORF8_37	Predicted ORF	-	-	-	-	-	-	-	-	-	-	-	-	-	-	-	-	-	-	-	-	-	-	-	-	-	-	-	-	-	-	-	-
654	ORF8_38	1079479	1079691	+	70	ORF8_38	Predicted ORF;Prophage|Prophage_13095918 NC_002671 Csp {Lactococcus phage bIL312}	-	-	-	-	-	-	-	-	-	-	-	-	Prophage_13095918	0.571	-	-	-	-	-	-	-	-	-	-	-	-	-	-	PAI_AAO18076	0.657	-	-
655	ORF8_39	1080269	1080511	-	80	ORF8_39	Predicted ORF	-	-	-	-	-	-	-	-	-	-	-	-	-	-	-	-	-	-	-	-	-	-	-	-	-	-	-	-	-	-	-	-
656	ORF8_40	1080549	1080887	+	112	ORF8_40	Predicted ORF	-	-	-	-	-	-	-	-	-	-	-	-	-	-	-	-	-	-	-	-	-	-	-	-	-	-	-	-	-	-	-	-
657	ORF8_41	1081150	1082409	+	419	ORF8_41	Predicted ORF	-	-	-	-	-	-	-	-	-	-	-	-	-	-	-	-	-	-	-	-	-	-	-	-	-	-	-	-	-	-	-	-
658	ORF8_43	1083623	1084657	-	344	ORF8_43	Predicted ORF	-	-	-	-	-	-	-	-	-	-	-	-	-	-	-	-	-	-	-	-	-	-	-	-	-	-	-	-	-	-	-	-
659	ORF8_44	1084745	1085488	-	247	ORF8_44	Predicted ORF	-	-	-	-	-	-	-	-	-	-	-	-	-	-	-	-	-	-	-	-	-	-	-	-	-	-	-	-	-	-	-	-
660	ORF8_45	1085623	1086318	-	231	ORF8_45	Predicted ORF	-	-	-	-	-	-	-	-	-	-	-	-	-	-	-	-	-	-	-	-	-	-	-	-	-	-	-	-	-	-	-	-
661	ORF8_46	1087094	1087624	+	176	ORF8_46	Predicted ORF	-	-	-	-	-	-	-	-	-	-	-	-	-	-	-	-	-	-	-	-	-	-	-	-	-	-	-	-	-	-	-	-
662	ORF8_47	1087632	1089896	+	754	ORF8_47	Predicted ORF	-	-	-	-	-	-	-	-	-	-	-	-	-	-	-	-	-	-	-	-	-	-	-	-	-	-	-	-	-	-	-	-
663	ORF8_49	1090764	1091573	+	269	ORF8_49	Predicted ORF	-	-	-	-	-	-	-	-	-	-	-	-	-	-	-	-	-	-	-	-	-	-	-	-	-	-	-	-	-	-	-	-
664	ORF8_50	1091575	1092369	+	264	ORF8_50	Predicted ORF;Prophage|Prophage_66392008 NC_007022 td dTMP (thymidylate) synthase {Aeromonas phage 31}	-	-	-	-	-	-	-	-	-	-	-	-	Prophage_148747783	0.705	-	-	-	-	-	-	-	-	-	-	-	-	-	-	-	-	-	-
665	ORF8_51	1092662	1093813	-	383	ORF8_51	Predicted ORF	-	-	-	-	-	-	-	-	-	-	-	-	-	-	-	-	-	-	-	-	-	-	-	-	-	-	-	-	-	-	-	-
666	ORF8_52	1094121	1095290	+	389	ORF8_52	Predicted ORF	-	-	-	-	-	-	-	-	-	-	-	-	-	-	-	-	-	-	-	-	-	-	-	-	-	-	-	-	-	-	-	-
667	ORF8_55	1097061	1097321	-	86	ORF8_55	Predicted ORF	-	-	-	-	-	-	-	-	-	-	-	-	-	-	-	-	-	-	-	-	-	-	-	-	-	-	-	-	-	-	-	-
668	ORF8_56	1097544	1099115	+	523	ORF8_56	Predicted ORF;	-	-	-	-	-	-	-	-	-	-	-	-	-	-	-	-	-	-	-	-	-	-	-	-	-	-	-	-	-	-	ARI_697403879	0.436
669	ORF8_57	1099183	1100121	+	312	ORF8_57	Predicted ORF	-	-	-	-	-	-	-	-	-	-	-	-	-	-	-	-	-	-	-	-	-	-	-	-	-	-	-	-	-	-	-	-
670	ORF8_58	1100159	1102969	+	936	ORF8_58	Predicted ORF	-	-	-	-	-	-	-	-	-	-	-	-	-	-	-	-	-	-	-	-	-	-	-	-	-	-	-	-	-	-	-	-
671	ORF8_59	1103005	1103490	+	161	ORF8_59	Predicted ORF;	-	-	-	-	-	-	-	-	-	-	-	-	-	-	-	-	-	-	-	-	-	-	-	-	-	-	-	-	-	-	ARI_482862082	0.46
672	ORF8_60	1103711	1104172	+	153	ORF8_60	Predicted ORF	-	-	-	-	-	-	-	-	-	-	-	-	-	-	-	-	-	-	-	-	-	-	-	-	-	-	-	-	-	-	-	-
673	ORF8_61	1104184	1105128	+	314	ORF8_61	Predicted ORF	-	-	-	-	-	-	-	-	-	-	-	-	-	-	-	-	-	-	-	-	-	-	-	-	-	-	-	-	-	-	-	-
674	ORF8_62	1105217	1106026	+	269	ORF8_62	Predicted ORF	-	-	-	-	-	-	-	-	-	-	-	-	-	-	-	-	-	-	-	-	-	-	-	-	-	-	-	-	-	-	-	-
675	ORF8_63	1106472	1107632	+	386	ORF8_63	Predicted ORF	-	-	-	-	-	-	-	-	-	-	-	-	-	-	-	-	-	-	-	-	-	-	-	-	-	-	-	-	-	-	-	-
676	ORF8_64	1107662	1110880	+	1072	ORF8_64	Predicted ORF	-	-	-	-	-	-	-	-	-	-	-	-	-	-	-	-	-	-	-	-	-	-	-	-	-	-	-	-	-	-	-	-
677	ORF8_65	1111171	1112601	-	476	ORF8_65	Predicted ORF	-	-	-	-	-	-	-	-	-	-	-	-	-	-	-	-	-	-	-	-	-	-	-	-	-	-	-	-	-	-	-	-
678	ORF8_66	1112823	1113299	+	158	ORF8_66	Predicted ORF	-	-	-	-	-	-	-	-	-	-	-	-	-	-	-	-	-	-	-	-	-	-	-	-	-	-	-	-	-	-	-	-
679	ORF8_67	1113501	1113794	-	97	ORF8_67	Predicted ORF	-	-	-	-	-	-	-	-	-	-	-	-	-	-	-	-	-	-	-	-	-	-	-	-	-	-	-	-	-	-	-	-
680	ORF8_68	1113907	1114536	+	209	ORF8_68	Predicted ORF	-	-	-	-	-	-	-	-	-	-	-	-	-	-	-	-	-	-	-	-	-	-	-	-	-	-	-	-	-	-	-	-
681	ORF8_72	1119121	1119465	+	114	ORF8_72	Predicted ORF	-	-	-	-	-	-	-	-	-	-	-	-	-	-	-	-	-	-	-	-	-	-	-	-	-	-	-	-	-	-	-	-
682	ORF8_73	1119920	1120387	+	155	ORF8_73	Predicted ORF	-	-	-	-	-	-	-	-	-	-	-	-	-	-	-	-	-	-	-	-	-	-	-	-	-	-	-	-	-	-	-	-
683	ORF8_74	1120409	1121902	+	497	ORF8_74	Predicted ORF	-	-	-	-	-	-	-	-	-	-	-	-	-	-	-	-	-	-	-	-	-	-	-	-	-	-	-	-	-	-	-	-
684	ORF8_76	1124727	1125137	+	136	ORF8_76	Predicted ORF	-	-	-	-	-	-	-	-	-	-	-	-	-	-	-	-	-	-	-	-	-	-	-	-	-	-	-	-	-	-	-	-
685	ORF8_77	1125137	1126072	+	311	ORF8_77	Predicted ORF	-	-	-	-	-	-	-	-	-	-	-	-	-	-	-	-	-	-	-	-	-	-	-	-	-	-	-	-	-	-	-	-
686	ORF8_78	1126233	1126502	+	89	ORF8_78	Predicted ORF	-	-	-	-	-	-	-	-	-	-	-	-	-	-	-	-	-	-	-	-	-	-	-	-	-	-	-	-	-	-	-	-
687	ORF8_79	1126951	1129065	+	704	ORF8_79	Predicted ORF	-	-	-	-	-	-	-	-	-	-	-	-	-	-	-	-	-	-	-	-	-	-	-	-	-	-	-	-	-	-	-	-
688	ORF8_80	1129167	1130045	+	292	ORF8_80	Predicted ORF	-	-	-	-	-	-	-	-	-	-	-	-	-	-	-	-	-	-	-	-	-	-	-	-	-	-	-	-	-	-	-	-
689	ORF8_82	1132262	1133140	-	292	ORF8_82	Predicted ORF	-	-	-	-	-	-	-	-	-	-	-	-	-	-	-	-	-	-	-	-	-	-	-	-	-	-	-	-	-	-	-	-
690	ORF8_83	1133155	1134150	-	331	ORF8_83	Predicted ORF	-	-	-	-	-	-	-	-	-	-	-	-	-	-	-	-	-	-	-	-	-	-	-	-	-	-	-	-	-	-	-	-
691	ORF8_85	1136596	1137117	+	173	ORF8_85	Predicted ORF	-	-	-	-	-	-	-	-	-	-	-	-	-	-	-	-	-	-	-	-	-	-	-	-	-	-	-	-	-	-	-	-
692	ORF8_86	1137111	1137617	+	168	ORF8_86	Predicted ORF	-	-	-	-	-	-	-	-	-	-	-	-	-	-	-	-	-	-	-	-	-	-	-	-	-	-	-	-	-	-	-	-
693	ORF8_89	1142146	1143750	+	534	ORF8_89	Predicted ORF	-	-	-	-	-	-	-	-	-	-	-	-	-	-	-	-	-	-	-	-	-	-	-	-	-	-	-	-	-	-	-	-
694	ORF8_92	1148646	1149104	+	152	ORF8_92	Predicted ORF	-	-	-	-	-	-	-	-	-	-	-	-	-	-	-	-	-	-	-	-	-	-	-	-	-	-	-	-	-	-	-	-
695	ORF8_93	1149575	1150828	-	417	ORF8_93	Predicted ORF	-	-	-	-	-	-	-	-	-	-	-	-	-	-	-	-	-	-	-	-	-	-	-	-	-	-	-	-	-	-	-	-
696	ORF8_96	1154174	1155238	-	354	ORF8_96	Predicted ORF	-	-	-	-	-	-	-	-	-	-	-	-	-	-	-	-	-	-	-	-	-	-	-	-	-	-	-	-	-	-	-	-
697	ORF8_99	1159627	1160778	-	383	ORF8_99	Predicted ORF	-	-	-	-	-	-	-	-	-	-	-	-	-	-	-	-	-	-	-	-	-	-	-	-	-	-	-	-	-	-	-	-
698	ORF8_100	1161148	1162341	-	397	ORF8_100	Predicted ORF	-	-	-	-	-	-	-	-	-	-	-	-	-	-	-	-	-	-	-	-	-	-	-	-	-	-	-	-	-	-	-	-
699	ORF8_103	1165423	1165695	-	90	ORF8_103	Predicted ORF	-	-	-	-	-	-	-	-	-	-	-	-	-	-	-	-	-	-	-	-	-	-	-	-	-	-	-	-	-	-	-	-
700	ORF8_104	1165692	1166906	-	404	ORF8_104	Predicted ORF	-	-	-	-	-	-	-	-	-	-	-	-	-	-	-	-	-	-	-	-	-	-	-	-	-	-	-	-	-	-	-	-
701	ORF8_105	1166966	1167682	+	238	ORF8_105	Predicted ORF	-	-	-	-	-	-	-	-	-	-	-	-	-	-	-	-	-	-	-	-	-	-	-	-	-	-	-	-	-	-	-	-
702	ORF8_106	1167682	1168008	+	108	ORF8_106	Predicted ORF	-	-	-	-	-	-	-	-	-	-	-	-	-	-	-	-	-	-	-	-	-	-	-	-	-	-	-	-	-	-	-	-
703	ORF8_108	1169195	1169932	+	245	ORF8_108	Predicted ORF	-	-	-	-	-	-	-	-	-	-	-	-	-	-	-	-	-	-	-	-	-	-	-	-	-	-	-	-	-	-	-	-
704	ORF8_109	1170342	1170635	+	97	ORF8_109	Predicted ORF	-	-	-	-	-	-	-	-	-	-	-	-	-	-	-	-	-	-	-	-	-	-	-	-	-	-	-	-	-	-	-	-
705	ORF8_111	1171859	1172464	-	201	ORF8_111	Predicted ORF	-	-	-	-	-	-	-	-	-	-	-	-	-	-	-	-	-	-	-	-	-	-	-	-	-	-	-	-	-	-	-	-
706	ORF8_112	1172658	1173161	-	167	ORF8_112	Predicted ORF	-	-	-	-	-	-	-	-	-	-	-	-	-	-	-	-	-	-	-	-	-	-	-	-	-	-	-	-	-	-	-	-
707	ORF8_113	1173230	1173517	-	95	ORF8_113	Predicted ORF	-	-	-	-	-	-	-	-	-	-	-	-	-	-	-	-	-	-	-	-	-	-	-	-	-	-	-	-	-	-	-	-
708	ORF8_114	1173529	1174083	-	184	ORF8_114	Predicted ORF	-	-	-	-	-	-	-	-	-	-	-	-	-	-	-	-	-	-	-	-	-	-	-	-	-	-	-	-	-	-	-	-
709	ORF8_116	1175013	1175720	-	235	ORF8_116	Predicted ORF	-	-	-	-	-	-	-	-	-	-	-	-	-	-	-	-	-	-	-	-	-	-	-	-	-	-	-	-	-	-	-	-
710	ORF8_117	1175743	1176843	+	366	ORF8_117	Predicted ORF;VF|VFG1224 (gi:15595593) pilU - twitching motility protein PilU	VFG1223	0.65	-	-	-	-	-	-	-	-	-	-	-	-	-	-	-	-	-	-	-	-	-	-	-	-	-	-	-	-	-	-
711	ORF8_118	1176827	1177936	+	369	ORF8_118	Predicted ORF;VF|VFG0232 (gi:15675990) pilT - twitching motility protein PilT	VFG1224	0.493	-	-	-	-	-	-	-	-	-	-	-	-	-	-	-	-	-	-	-	-	-	-	-	-	-	-	-	-	-	-
712	ORF8_119	1178172	1178447	+	91	ORF8_119	Predicted ORF	-	-	-	-	-	-	-	-	-	-	-	-	-	-	-	-	-	-	-	-	-	-	-	-	-	-	-	-	-	-	-	-
713	ORF8_120	1178464	1178871	-	135	ORF8_120	Predicted ORF	-	-	-	-	-	-	-	-	-	-	-	-	-	-	-	-	-	-	-	-	-	-	-	-	-	-	-	-	-	-	-	-
714	ORF8_121	1178908	1179471	-	187	ORF8_121	Predicted ORF	-	-	-	-	-	-	-	-	-	-	-	-	-	-	-	-	-	-	-	-	-	-	-	-	-	-	-	-	-	-	-	-
715	ORF8_122	1179685	1180638	-	317	ORF8_122	Predicted ORF	-	-	-	-	-	-	-	-	-	-	-	-	-	-	-	-	-	-	-	-	-	-	-	-	-	-	-	-	-	-	-	-
716	ORF8_123	1180648	1181382	-	244	ORF8_123	Predicted ORF	-	-	-	-	-	-	-	-	-	-	-	-	-	-	-	-	-	-	-	-	-	-	-	-	-	-	-	-	-	-	-	-
717	ORF8_124	1181564	1182076	+	170	ORF8_124	Predicted ORF	-	-	-	-	-	-	-	-	-	-	-	-	-	-	-	-	-	-	-	-	-	-	-	-	-	-	-	-	-	-	-	-
718	ORF8_125	1182073	1182282	+	69	ORF8_125	Predicted ORF	-	-	-	-	-	-	-	-	-	-	-	-	-	-	-	-	-	-	-	-	-	-	-	-	-	-	-	-	-	-	-	-
719	ORF8_127	1183325	1184986	+	553	ORF8_127	Predicted ORF	-	-	-	-	-	-	-	-	-	-	-	-	-	-	-	-	-	-	-	-	-	-	-	-	-	-	-	-	-	-	-	-
720	ORF8_128	1185116	1185871	-	251	ORF8_128	Predicted ORF	-	-	-	-	-	-	-	-	-	-	-	-	-	-	-	-	-	-	-	-	-	-	-	-	-	-	-	-	-	-	-	-
721	ORF8_129	1185935	1186543	-	202	ORF8_129	Predicted ORF	-	-	-	-	-	-	-	-	-	-	-	-	-	-	-	-	-	-	-	-	-	-	-	-	-	-	-	-	-	-	-	-
722	ORF8_130	1186776	1187930	-	384	ORF8_130	Predicted ORF	-	-	-	-	-	-	-	-	-	-	-	-	-	-	-	-	-	-	-	-	-	-	-	-	-	-	-	-	-	-	-	-
723	ORF8_131	1188855	1190828	+	657	ORF8_131	Predicted ORF	-	-	-	-	-	-	-	-	-	-	-	-	-	-	-	-	-	-	-	-	-	-	-	-	-	-	-	-	-	-	-	-
724	ORF8_132	1190920	1191840	+	306	ORF8_132	Predicted ORF	-	-	-	-	-	-	-	-	-	-	-	-	-	-	-	-	-	-	-	-	-	-	-	-	-	-	-	-	-	-	-	-
725	ORF8_133	1191934	1192353	-	139	ORF8_133	Predicted ORF	-	-	-	-	-	-	-	-	-	-	-	-	-	-	-	-	-	-	-	-	-	-	-	-	-	-	-	-	-	-	-	-
726	ORF8_134	1192588	1193412	-	274	ORF8_134	Predicted ORF	-	-	-	-	-	-	-	-	-	-	-	-	-	-	-	-	-	-	-	-	-	-	-	-	-	-	-	-	-	-	-	-
727	ORF8_135	1193510	1196131	-	873	ORF8_135	Predicted ORF	-	-	-	-	-	-	-	-	-	-	-	-	-	-	-	-	-	-	-	-	-	-	-	-	-	-	-	-	-	-	-	-
728	ORF8_137	1197326	1198051	+	241	ORF8_137	Predicted ORF	-	-	-	-	-	-	-	-	-	-	-	-	-	-	-	-	-	-	-	-	-	-	-	-	-	-	-	-	-	-	-	-
729	ORF8_138	1198181	1199035	+	284	ORF8_138	Predicted ORF	-	-	-	-	-	-	-	-	-	-	-	-	-	-	-	-	-	-	-	-	-	-	-	-	-	-	-	-	-	-	-	-
730	ORF8_139	1199182	1199904	+	240	ORF8_139	Predicted ORF	-	-	-	-	-	-	-	-	-	-	-	-	-	-	-	-	-	-	-	-	-	-	-	-	-	-	-	-	-	-	-	-
731	ORF8_140	1199990	1200547	+	185	ORF8_140	Predicted ORF	-	-	-	-	-	-	-	-	-	-	-	-	-	-	-	-	-	-	-	-	-	-	-	-	-	-	-	-	-	-	-	-
732	ORF8_141	1200786	1201976	+	396	ORF8_141	Predicted ORF	-	-	-	-	-	-	-	-	-	-	-	-	-	-	-	-	-	-	-	-	-	-	-	-	-	-	-	-	-	-	-	-
733	ORF8_142	1202265	1203011	+	248	ORF8_142	Predicted ORF	-	-	-	-	-	-	-	-	-	-	-	-	-	-	-	-	-	-	-	-	-	-	-	-	-	-	-	-	-	-	-	-
734	ORF8_143	1203046	1203900	+	284	ORF8_143	Predicted ORF	-	-	-	-	-	-	-	-	-	-	-	-	-	-	-	-	-	-	-	-	-	-	-	-	-	-	-	-	-	-	-	-
735	ORF8_144	1203958	1205322	+	454	ORF8_144	Predicted ORF	-	-	-	-	-	-	-	-	-	-	-	-	-	-	-	-	-	-	-	-	-	-	-	-	-	-	-	-	-	-	-	-
736	ORF8_145	1205354	1207795	+	813	ORF8_145	Predicted ORF	-	-	-	-	-	-	-	-	-	-	-	-	-	-	-	-	-	-	-	-	-	-	-	-	-	-	-	-	-	-	-	-
737	ORF8_146	1207832	1208341	+	169	ORF8_146	Predicted ORF	-	-	-	-	-	-	-	-	-	-	-	-	-	-	-	-	-	-	-	-	-	-	-	-	-	-	-	-	-	-	-	-
738	ORF8_147	1208341	1209372	+	343	ORF8_147	Predicted ORF	-	-	-	-	-	-	-	-	-	-	-	-	-	-	-	-	-	-	-	-	-	-	-	-	-	-	-	-	-	-	-	-
739	ORF8_148	1209515	1209967	+	150	ORF8_148	Predicted ORF	-	-	-	-	-	-	-	-	-	-	-	-	-	-	-	-	-	-	-	-	-	-	-	-	-	-	-	-	-	-	-	-
740	ORF8_151	1211979	1212572	+	197	ORF8_151	Predicted ORF	-	-	-	-	-	-	-	-	-	-	-	-	-	-	-	-	-	-	-	-	-	-	-	-	-	-	-	-	-	-	-	-
741	ORF8_153	1216173	1217132	+	319	ORF8_153	Predicted ORF	-	-	-	-	-	-	-	-	-	-	-	-	-	-	-	-	-	-	-	-	-	-	-	-	-	-	-	-	-	-	-	-
742	ORF8_155	1220182	1221492	+	436	ORF8_155	Predicted ORF;PAI|PAI_CAA21364 -	VFG1671	0.702	-	-	-	-	-	-	-	-	-	-	-	-	-	-	-	-	-	-	-	-	-	-	-	-	-	-	PAI_CAD66196	0.702	-	-
743	ORF8_156	1221607	1223742	+	711	ORF8_156	Predicted ORF;VF|VFG1670 (gi:28316250) orf47 - putative cadaverin decarboxylase	VFG1670	0.684	-	-	-	-	-	-	-	-	-	-	-	-	-	-	-	-	-	-	-	-	-	-	-	-	-	-	PAI_CAD66195	0.684	-	-
744	ORF8_157	1223882	1224739	+	285	ORF8_157	Predicted ORF	-	-	-	-	-	-	-	-	-	-	-	-	-	-	-	-	-	-	-	-	-	-	-	-	-	-	-	-	-	-	-	-
745	ORF8_158	1224823	1225212	+	129	ORF8_158	Predicted ORF	-	-	-	-	-	-	-	-	-	-	-	-	-	-	-	-	-	-	-	-	-	-	-	-	-	-	-	-	-	-	-	-
746	ORF8_159	1225202	1226521	+	439	ORF8_159	Predicted ORF	-	-	-	-	-	-	-	-	-	-	-	-	-	-	-	-	-	-	-	-	-	-	-	-	-	-	-	-	-	-	-	-
747	ORF8_160	1226613	1226864	-	83	ORF8_160	Predicted ORF	-	-	-	-	-	-	-	-	-	-	-	-	-	-	-	-	-	-	-	-	-	-	-	-	-	-	-	-	-	-	-	-
748	ORF8_161	1226875	1227075	-	66	ORF8_161	Predicted ORF	-	-	-	-	-	-	-	-	-	-	-	-	-	-	-	-	-	-	-	-	-	-	-	-	-	-	-	-	-	-	-	-
749	ORF8_162	1227261	1227992	+	243	ORF8_162	Predicted ORF	-	-	-	-	-	-	-	-	-	-	-	-	-	-	-	-	-	-	-	-	-	-	-	-	-	-	-	-	-	-	-	-
750	ORF8_163	1228216	1229934	-	572	ORF8_163	Predicted ORF	-	-	-	-	-	-	-	-	-	-	-	-	-	-	-	-	-	-	-	-	-	-	-	-	-	-	-	-	-	-	-	-
751	ORF8_164	1230022	1230750	-	242	ORF8_164	Predicted ORF	-	-	-	-	-	-	-	-	-	-	-	-	-	-	-	-	-	-	-	-	-	-	-	-	-	-	-	-	-	-	-	-
752	ORF8_165	1230775	1231335	-	186	ORF8_165	Predicted ORF	-	-	-	-	-	-	-	-	-	-	-	-	-	-	-	-	-	-	-	-	-	-	-	-	-	-	-	-	-	-	-	-
753	ORF8_166	1231383	1232192	-	269	ORF8_166	Predicted ORF	-	-	-	-	-	-	-	-	-	-	-	-	-	-	-	-	-	-	-	-	-	-	-	-	-	-	-	-	-	-	-	-
754	ORF8_169	1234366	1234926	+	186	ORF8_169	Predicted ORF	-	-	-	-	-	-	-	-	-	-	-	-	-	-	-	-	-	-	-	-	-	-	-	-	-	-	-	-	-	-	-	-
755	ORF9_1	1235555	1235866	+	103	ORF9_1	Predicted ORF	-	-	-	-	-	-	-	-	-	-	-	-	-	-	-	-	-	-	-	-	-	-	-	-	-	-	-	-	-	-	-	-
756	ORF9_2	1235898	1236527	+	209	ORF9_2	Predicted ORF	-	-	-	-	-	-	-	-	-	-	-	-	-	-	-	-	-	-	-	-	-	-	-	-	-	-	-	-	-	-	-	-
757	ORF9_3	1236546	1237151	+	201	ORF9_3	Predicted ORF	-	-	-	-	-	-	-	-	-	-	-	-	-	-	-	-	-	-	-	-	-	-	-	-	-	-	-	-	-	-	-	-
758	ORF9_4	1237148	1237450	+	100	ORF9_4	Predicted ORF	-	-	-	-	-	-	-	-	-	-	-	-	-	-	-	-	-	-	-	-	-	-	-	-	-	-	-	-	-	-	-	-
759	ORF9_5	1237470	1238288	+	272	ORF9_5	Predicted ORF	-	-	-	-	-	-	-	-	-	-	-	-	-	-	-	-	-	-	-	-	-	-	-	-	-	-	-	-	-	-	-	-
760	ORF9_6	1238313	1238591	+	92	ORF9_6	Predicted ORF	-	-	-	-	-	-	-	-	-	-	-	-	-	-	-	-	-	-	-	-	-	-	-	-	-	-	-	-	-	-	-	-
761	ORF9_7	1238602	1238934	+	110	ORF9_7	Predicted ORF	-	-	-	-	-	-	-	-	-	-	-	-	-	-	-	-	-	-	-	-	-	-	-	-	-	-	-	-	-	-	-	-
762	ORF9_8	1238952	1239653	+	233	ORF9_8	Predicted ORF	-	-	-	-	-	-	-	-	-	-	-	-	-	-	-	-	-	-	-	-	-	-	-	-	-	-	-	-	-	-	-	-
763	ORF9_9	1239665	1240075	+	136	ORF9_9	Predicted ORF	-	-	-	-	-	-	-	-	-	-	-	-	-	-	-	-	-	-	-	-	-	-	-	-	-	-	-	-	-	-	-	-
764	ORF9_10	1240075	1240266	+	63	ORF9_10	Predicted ORF	-	-	-	-	-	-	-	-	-	-	-	-	-	-	-	-	-	-	-	-	-	-	-	-	-	-	-	-	-	-	-	-
765	ORF9_11	1240266	1240520	+	84	ORF9_11	Predicted ORF	-	-	-	-	-	-	-	-	-	-	-	-	-	-	-	-	-	-	-	-	-	-	-	-	-	-	-	-	-	-	-	-
766	ORF9_12	1240726	1241097	+	123	ORF9_12	Predicted ORF	-	-	-	-	-	-	-	-	-	-	-	-	-	-	-	-	-	-	-	-	-	-	-	-	-	-	-	-	-	-	-	-
767	ORF9_13	1241109	1241423	+	104	ORF9_13	Predicted ORF	-	-	-	-	-	-	-	-	-	-	-	-	-	-	-	-	-	-	-	-	-	-	-	-	-	-	-	-	-	-	-	-
768	ORF9_14	1241439	1241978	+	179	ORF9_14	Predicted ORF	-	-	-	-	-	-	-	-	-	-	-	-	-	-	-	-	-	-	-	-	-	-	-	-	-	-	-	-	-	-	-	-
769	ORF9_15	1241991	1242296	+	101	ORF9_15	Predicted ORF	-	-	-	-	-	-	-	-	-	-	-	-	-	-	-	-	-	-	-	-	-	-	-	-	-	-	-	-	-	-	-	-
770	ORF9_16	1242331	1242723	+	130	ORF9_16	Predicted ORF	-	-	-	-	-	-	-	-	-	-	-	-	-	-	-	-	-	-	-	-	-	-	-	-	-	-	-	-	-	-	-	-
771	ORF9_17	1242741	1243274	+	177	ORF9_17	Predicted ORF	-	-	-	-	-	-	-	-	-	-	-	-	-	-	-	-	-	-	-	-	-	-	-	-	-	-	-	-	-	-	-	-
772	ORF9_18	1243284	1243637	+	117	ORF9_18	Predicted ORF	-	-	-	-	-	-	-	-	-	-	-	-	-	-	-	-	-	-	-	-	-	-	-	-	-	-	-	-	-	-	-	-
773	ORF9_19	1243652	1244152	+	166	ORF9_19	Predicted ORF	-	-	-	-	-	-	-	-	-	-	-	-	-	-	-	-	-	-	-	-	-	-	-	-	-	-	-	-	-	-	-	-
774	ORF9_20	1244152	1244337	+	61	ORF9_20	Predicted ORF	-	-	-	-	-	-	-	-	-	-	-	-	-	-	-	-	-	-	-	-	-	-	-	-	-	-	-	-	-	-	-	-
775	ORF9_21	1244341	1244775	+	144	ORF9_21	Predicted ORF	-	-	-	-	-	-	-	-	-	-	-	-	-	-	-	-	-	-	-	-	-	-	-	-	-	-	-	-	-	-	-	-
776	ORF9_22	1244783	1246108	+	441	ORF9_22	Predicted ORF	-	-	-	-	-	-	-	-	-	-	-	-	-	-	-	-	-	-	-	-	-	-	-	-	-	-	-	-	-	-	-	-
777	ORF9_23	1246145	1246258	+	37	ORF9_23	Predicted ORF	-	-	-	-	-	-	-	-	-	-	-	-	-	-	-	-	-	-	-	-	-	-	-	-	-	-	-	-	-	-	-	-
778	ORF9_24	1246404	1246760	+	118	ORF9_24	Predicted ORF	-	-	-	-	-	-	-	-	-	-	-	-	-	-	-	-	-	-	-	-	-	-	-	-	-	-	-	-	-	-	-	-
779	ORF9_25	1246774	1247163	+	129	ORF9_25	Predicted ORF	-	-	-	-	-	-	-	-	-	-	-	-	-	-	-	-	-	-	-	-	-	-	-	-	-	-	-	-	-	-	-	-
780	ORF9_26	1247196	1247816	+	206	ORF9_26	Predicted ORF	-	-	-	-	-	-	-	-	-	-	-	-	-	-	-	-	-	-	-	-	-	-	-	-	-	-	-	-	-	-	-	-
781	ORF9_27	1247842	1248831	+	329	ORF9_27	Predicted ORF	-	-	-	-	-	-	-	-	-	-	-	-	-	-	-	-	-	-	-	-	-	-	-	-	-	-	-	-	-	-	-	-
782	ORF9_28	1248872	1249255	+	127	ORF9_28	Predicted ORF	-	-	-	-	-	-	-	-	-	-	-	-	-	-	-	-	-	-	-	-	-	-	-	-	-	-	-	-	-	-	-	-
783	ORF9_29	1249355	1249765	-	136	ORF9_29	Predicted ORF	-	-	-	-	-	-	-	-	-	-	-	-	-	-	-	-	-	-	-	-	-	-	-	-	-	-	-	-	-	-	-	-
784	ORF9_30	1249949	1251325	-	458	ORF9_30	Predicted ORF	-	-	-	-	-	-	-	-	-	-	-	-	-	-	-	-	-	-	-	-	-	-	-	-	-	-	-	-	-	-	-	-
785	ORF9_31	1251355	1252665	-	436	ORF9_31	Predicted ORF	-	-	-	-	-	-	-	-	-	-	-	-	-	-	-	-	-	-	-	-	-	-	-	-	-	-	-	-	-	-	-	-
786	ORF9_33	1253646	1254158	-	170	ORF9_33	Predicted ORF	-	-	-	-	-	-	-	-	-	-	-	-	-	-	-	-	-	-	-	-	-	-	-	-	-	-	-	-	-	-	-	-
787	ORF9_34	1254274	1255344	+	356	ORF9_34	Predicted ORF	-	-	-	-	-	-	-	-	-	-	-	-	-	-	-	-	-	-	-	-	-	-	-	-	-	-	-	-	-	-	-	-
788	ORF9_35	1255328	1256458	+	376	ORF9_35	Predicted ORF	-	-	-	-	-	-	-	-	-	-	-	-	-	-	-	-	-	-	-	-	-	-	-	-	-	-	-	-	-	-	-	-
789	ORF9_36	1256430	1256906	+	158	ORF9_36	Predicted ORF	-	-	-	-	-	-	-	-	-	-	-	-	-	-	-	-	-	-	-	-	-	-	-	-	-	-	-	-	-	-	-	-
790	ORF9_38	1257468	1258022	+	184	ORF9_38	Predicted ORF	-	-	-	-	-	-	-	-	-	-	-	-	-	-	-	-	-	-	-	-	-	-	-	-	-	-	-	-	-	-	-	-
791	ORF9_39	1258074	1258892	+	272	ORF9_39	Predicted ORF	-	-	-	-	-	-	-	-	-	-	-	-	-	-	-	-	-	-	-	-	-	-	-	-	-	-	-	-	-	-	-	-
792	ORF9_40	1258895	1259155	+	86	ORF9_40	Predicted ORF	-	-	-	-	-	-	-	-	-	-	-	-	-	-	-	-	-	-	-	-	-	-	-	-	-	-	-	-	-	-	-	-
793	ORF10_1	1260212	1260448	+	78	ORF10_1	Predicted ORF	-	-	-	-	-	-	-	-	-	-	-	-	-	-	-	-	-	-	-	-	-	-	-	-	-	-	-	-	-	-	-	-
794	ORF12_1	1262342	1262545	-	67	ORF12_1	Predicted ORF	-	-	-	-	-	-	-	-	-	-	-	-	-	-	-	-	-	-	-	-	-	-	-	-	-	-	-	-	-	-	-	-
795	ORF12_2	1262851	1264314	-	487	ORF12_2	Predicted ORF	-	-	-	-	-	-	-	-	-	-	-	-	-	-	-	-	-	-	-	-	-	-	-	-	-	-	-	-	-	-	-	-
796	ORF12_4	1266920	1267795	-	291	ORF12_4	Predicted ORF	-	-	-	-	-	-	-	-	-	-	-	-	-	-	-	-	-	-	-	-	-	-	-	-	-	-	-	-	-	-	-	-
797	ORF12_5	1268184	1268942	+	252	ORF12_5	Predicted ORF	-	-	-	-	-	-	-	-	-	-	-	-	-	-	-	-	-	-	-	-	-	-	-	-	-	-	-	-	-	-	-	-
798	ORF12_6	1269051	1270172	-	373	ORF12_6	Predicted ORF	-	-	-	-	-	-	-	-	-	-	-	-	-	-	-	-	-	-	-	-	-	-	-	-	-	-	-	-	-	-	-	-
799	ORF12_7	1270560	1271528	+	322	ORF12_7	Predicted ORF	-	-	-	-	-	-	-	-	-	-	-	-	-	-	-	-	-	-	-	-	-	-	-	-	-	-	-	-	-	-	-	-
800	ORF12_8	1271860	1272117	+	85	ORF12_8	Predicted ORF	-	-	-	-	-	-	-	-	-	-	-	-	-	-	-	-	-	-	-	-	-	-	-	-	-	-	-	-	-	-	-	-
801	ORF12_9	1272175	1273902	+	575	ORF12_9	Predicted ORF	-	-	-	-	-	-	-	-	-	-	-	-	-	-	-	-	-	-	-	-	-	-	-	-	-	-	-	-	-	-	-	-
802	ORF12_10	1273975	1274484	+	169	ORF12_10	Predicted ORF	-	-	-	-	-	-	-	-	-	-	-	-	-	-	-	-	-	-	-	-	-	-	-	-	-	-	-	-	-	-	-	-
803	ORF12_11	1274584	1274919	-	111	ORF12_11	Predicted ORF	-	-	-	-	-	-	-	-	-	-	-	-	-	-	-	-	-	-	-	-	-	-	-	-	-	-	-	-	-	-	-	-
804	ORF12_13	1276082	1276663	-	193	ORF12_13	Predicted ORF	-	-	-	-	-	-	-	-	-	-	-	-	-	-	-	-	-	-	-	-	-	-	-	-	-	-	-	-	-	-	-	-
805	ORF12_14	1276793	1277281	-	162	ORF12_14	Predicted ORF	-	-	-	-	-	-	-	-	-	-	-	-	-	-	-	-	-	-	-	-	-	-	-	-	-	-	-	-	-	-	-	-
806	ORF12_16	1278276	1278560	-	94	ORF12_16	Predicted ORF	-	-	-	-	-	-	-	-	-	-	-	-	-	-	-	-	-	-	-	-	-	-	-	-	-	-	-	-	-	-	-	-
807	ORF12_17	1278844	1279197	+	117	ORF12_17	Predicted ORF	-	-	-	-	-	-	-	-	-	-	-	-	-	-	-	-	-	-	-	-	-	-	-	-	-	-	-	-	-	-	-	-
808	ORF12_19	1280385	1281068	+	227	ORF12_19	Predicted ORF	-	-	-	-	-	-	-	-	-	-	-	-	-	-	-	-	-	-	-	-	-	-	-	-	-	-	-	-	-	-	-	-
809	ORF12_20	1281141	1281509	+	122	ORF12_20	Predicted ORF	-	-	-	-	-	-	-	-	-	-	-	-	-	-	-	-	-	-	-	-	-	-	-	-	-	-	-	-	-	-	-	-
810	ORF12_21	1281606	1281734	+	42	ORF12_21	Predicted ORF	-	-	-	-	-	-	-	-	-	-	-	-	-	-	-	-	-	-	-	-	-	-	-	-	-	-	-	-	-	-	-	-
811	ORF12_22	1281872	1284085	-	737	ORF12_22	Predicted ORF	-	-	-	-	-	-	-	-	-	-	-	-	-	-	-	-	-	-	-	-	-	-	-	-	-	-	-	-	-	-	-	-
812	ORF12_25	1294223	1295302	-	359	ORF12_25	Predicted ORF	-	-	-	-	-	-	-	-	-	-	-	-	-	-	-	-	-	-	-	-	-	-	-	-	-	-	-	-	-	-	-	-
813	ORF12_27	1296349	1296909	+	186	ORF12_27	Predicted ORF	-	-	-	-	-	-	-	-	-	-	-	-	-	-	-	-	-	-	-	-	-	-	-	-	-	-	-	-	-	-	-	-
814	ORF12_29	1297542	1298612	-	356	ORF12_29	Predicted ORF	-	-	-	-	-	-	-	-	-	-	-	-	-	-	-	-	-	-	-	-	-	-	-	-	-	-	-	-	-	-	-	-
815	ORF12_30	1298612	1298866	-	84	ORF12_30	Predicted ORF	-	-	-	-	-	-	-	-	-	-	-	-	-	-	-	-	-	-	-	-	-	-	-	-	-	-	-	-	-	-	-	-
816	ORF12_31	1298998	1300503	+	501	ORF12_31	Predicted ORF	-	-	-	-	-	-	-	-	-	-	-	-	-	-	-	-	-	-	-	-	-	-	-	-	-	-	-	-	-	-	-	-
817	ORF12_32	1300559	1300906	+	115	ORF12_32	Predicted ORF;	-	-	-	-	-	-	-	-	-	-	-	-	-	-	-	-	-	-	-	-	-	-	-	-	-	-	-	-	-	-	ARI_672940412	0.435
818	ORF12_33	1300906	1301499	+	197	ORF12_33	Predicted ORF	-	-	-	-	-	-	-	-	-	-	-	-	-	-	-	-	-	-	-	-	-	-	-	-	-	-	-	-	-	-	-	-
819	ORF12_34	1301552	1301980	+	142	ORF12_34	Predicted ORF	-	-	-	-	-	-	-	-	-	-	-	-	-	-	-	-	-	-	-	-	-	-	-	-	-	-	-	-	-	-	-	-
820	ORF12_35	1302104	1302811	-	235	ORF12_35	Predicted ORF	-	-	-	-	-	-	-	-	-	-	-	-	-	-	-	-	-	-	-	-	-	-	-	-	-	-	-	-	-	-	-	-
821	ORF12_36	1302888	1304384	-	498	ORF12_36	Predicted ORF	-	-	-	-	-	-	-	-	-	-	-	-	-	-	-	-	-	-	-	-	-	-	-	-	-	-	-	-	-	-	-	-
822	ORF12_37	1304700	1305326	-	208	ORF12_37	Predicted ORF	-	-	-	-	-	-	-	-	-	-	-	-	-	-	-	-	-	-	-	-	-	-	-	-	-	-	-	-	-	-	-	-
823	ORF12_38	1305548	1306588	+	346	ORF12_38	Predicted ORF;Prophage|Prophage_61806048 NC_006883 hypothetical protein {Cyanophage P-SSM2}	-	-	-	-	-	-	-	-	-	-	-	-	Prophage_61806048	0.442	-	-	-	-	-	-	-	-	-	-	-	-	-	-	-	-	-	-
824	ORF12_40	1307461	1308288	+	275	ORF12_40	Predicted ORF	-	-	-	-	-	-	-	-	-	-	-	-	-	-	-	-	-	-	-	-	-	-	-	-	-	-	-	-	-	-	-	-
825	ORF12_41	1308473	1309180	-	235	ORF12_41	Predicted ORF	-	-	-	-	-	-	-	-	-	-	-	-	-	-	-	-	-	-	-	-	-	-	-	-	-	-	-	-	-	-	-	-
826	ORF12_43	1310050	1311660	-	536	ORF12_43	Predicted ORF	-	-	-	-	-	-	-	-	-	-	-	-	-	-	-	-	-	-	-	-	-	-	-	-	-	-	-	-	-	-	-	-
827	ORF12_44	1311710	1313938	-	742	ORF12_44	Predicted ORF	-	-	-	-	-	-	-	-	-	-	-	-	-	-	-	-	-	-	-	-	-	-	-	-	-	-	-	-	-	-	-	-
828	ORF12_45	1314156	1316252	+	698	ORF12_45	Predicted ORF	-	-	-	-	-	-	-	-	-	-	-	-	-	-	-	-	-	-	-	-	-	-	-	-	-	-	-	-	-	-	-	-
829	ORF12_46	1316230	1317786	+	518	ORF12_46	Predicted ORF	-	-	-	-	-	-	-	-	-	-	-	-	-	-	-	-	-	-	-	-	-	-	-	-	-	-	-	-	-	-	-	-
830	ORF12_47	1317920	1318813	+	297	ORF12_47	Predicted ORF	-	-	-	-	-	-	-	-	-	-	-	-	-	-	-	-	-	-	-	-	-	-	-	-	-	-	-	-	-	-	-	-
831	ORF12_48	1319097	1319447	+	116	ORF12_48	Predicted ORF	-	-	-	-	-	-	-	-	-	-	-	-	-	-	-	-	-	-	-	-	-	-	-	-	-	-	-	-	-	-	-	-
832	ORF12_50	1321088	1322071	+	327	ORF12_50	Predicted ORF	-	-	-	-	-	-	-	-	-	-	-	-	-	-	-	-	-	-	-	-	-	-	-	-	-	-	-	-	-	-	-	-
833	ORF12_55	1329319	1330602	-	427	ORF12_55	Predicted ORF	-	-	-	-	-	-	-	-	-	-	-	-	-	-	-	-	-	-	-	-	-	-	-	-	-	-	-	-	-	-	-	-
834	ORF12_56	1330857	1331774	+	305	ORF12_56	Predicted ORF;Prophage|Prophage_56692914 NC_006552 RdgC exonuclease {Pseudomonas phage F116}	-	-	-	-	-	-	-	-	-	-	-	-	Prophage_46401690	0.57	-	-	-	-	-	-	-	-	-	-	-	-	-	-	-	-	-	-
835	ORF12_57	1332138	1333511	+	457	ORF12_57	Predicted ORF	-	-	-	-	-	-	-	-	-	-	-	-	-	-	-	-	-	-	-	-	-	-	-	-	-	-	-	-	-	-	-	-
836	ORF12_58	1334184	1337306	+	1040	ORF12_58	Predicted ORF	-	-	-	-	-	-	-	-	-	-	-	-	-	-	-	-	-	-	-	-	-	-	-	-	-	-	-	-	-	-	-	-
837	ORF12_60	1339850	1341226	-	458	ORF12_60	Predicted ORF	-	-	-	-	-	-	-	-	-	-	-	-	-	-	-	-	-	-	-	-	-	-	-	-	-	-	-	-	-	-	-	-
838	ORF12_61	1341282	1342175	-	297	ORF12_61	Predicted ORF	-	-	-	-	-	-	-	-	-	-	-	-	-	-	-	-	-	-	-	-	-	-	-	-	-	-	-	-	-	-	-	-
839	ORF12_63	1343478	1343735	+	85	ORF12_63	Predicted ORF	-	-	-	-	-	-	-	-	-	-	-	-	-	-	-	-	-	-	-	-	-	-	-	-	-	-	-	-	-	-	-	-
840	ORF12_65	1346456	1347163	+	235	ORF12_65	Predicted ORF	-	-	-	-	-	-	-	-	-	-	-	-	-	-	-	-	-	-	-	-	-	-	-	-	-	-	-	-	-	-	-	-
841	ORF12_66	1347260	1349896	+	878	ORF12_66	Predicted ORF	-	-	-	-	-	-	-	-	-	-	-	-	-	-	-	-	-	-	-	-	-	-	-	-	-	-	-	-	-	-	-	-
842	ORF12_67	1350005	1350592	-	195	ORF12_67	Predicted ORF	-	-	-	-	-	-	-	-	-	-	-	-	-	-	-	-	-	-	-	-	-	-	-	-	-	-	-	-	-	-	-	-
843	ORF12_68	1350828	1352312	+	494	ORF12_68	Predicted ORF	-	-	-	-	-	-	-	-	-	-	-	-	-	-	-	-	-	-	-	-	-	-	-	-	-	-	-	-	-	-	-	-
844	ORF12_69	1352418	1353776	+	452	ORF12_69	Predicted ORF	-	-	-	-	-	-	-	-	-	-	-	-	-	-	-	-	-	-	-	-	-	-	-	-	-	-	-	-	-	-	-	-
845	ORF12_70	1353932	1354810	-	292	ORF12_70	Predicted ORF	-	-	-	-	-	-	-	-	-	-	-	-	-	-	-	-	-	-	-	-	-	-	-	-	-	-	-	-	-	-	-	-
846	ORF12_71	1354831	1354983	-	50	ORF12_71	Predicted ORF	-	-	-	-	-	-	-	-	-	-	-	-	-	-	-	-	-	-	-	-	-	-	-	-	-	-	-	-	-	-	-	-
847	ORF13_1	1354986	1355051	-	21	ORF13_1	Predicted ORF	-	-	-	-	-	-	-	-	-	-	-	-	-	-	-	-	-	-	-	-	-	-	-	-	-	-	-	-	-	-	-	-
848	ORF13_2	1355229	1355468	+	79	ORF13_2	Predicted ORF	-	-	-	-	-	-	-	-	-	-	-	-	-	-	-	-	-	-	-	-	-	-	-	-	-	-	-	-	-	-	-	-
849	ORF13_3	1356897	1357295	+	132	ORF13_3	Predicted ORF	-	-	-	-	-	-	-	-	-	-	-	-	-	-	-	-	-	-	-	-	-	-	-	-	-	-	-	-	-	-	-	-
850	ORF14_2	1359543	1359671	+	42	ORF14_2	Predicted ORF	-	-	-	-	-	-	-	-	-	-	-	-	-	-	-	-	-	-	-	-	-	-	-	-	-	-	-	-	-	-	-	-
851	ORF14_3	1360615	1360854	+	79	ORF14_3	Predicted ORF	-	-	-	-	-	-	-	-	-	-	-	-	-	-	-	-	-	-	-	-	-	-	-	-	-	-	-	-	-	-	-	-
852	ORF14_4	1361421	1361663	+	80	ORF14_4	Predicted ORF	-	-	-	-	-	-	-	-	-	-	-	-	-	-	-	-	-	-	-	-	-	-	-	-	-	-	-	-	-	-	-	-
853	ORF14_5	1361695	1362357	-	220	ORF14_5	Predicted ORF;	-	-	-	-	-	-	-	-	-	-	-	-	-	-	-	-	-	-	-	-	-	-	-	-	-	-	-	-	-	-	ARI_225121187	0.978
854	ORF14_6	1362436	1363635	+	399	ORF14_6	Predicted ORF;AR|AR_YP_001598107 TetA	-	-	AR_YP_001598107	1	-	-	-	-	-	-	-	-	-	-	-	-	-	-	-	-	-	-	-	-	-	-	-	-	-	-	ARI_225121188	1
855	ORF14_7	1363667	1364551	-	294	ORF14_7	Predicted ORF;	-	-	-	-	-	-	-	-	-	-	-	-	-	-	-	-	-	-	-	-	-	-	-	-	-	-	-	-	-	-	ARI_481190477	1
856	ORF14_8	1365040	1366836	+	598	ORF14_8	Predicted ORF;	-	-	-	-	-	-	-	-	-	-	-	-	-	-	-	-	-	-	-	-	-	-	-	-	-	-	-	-	-	-	ARI_481190478	1
857	ORF15_1	1368163	1368672	+	169	ORF15_1	Predicted ORF	-	-	-	-	-	-	-	-	-	-	-	-	-	-	-	-	-	-	-	-	-	-	-	-	-	-	-	-	-	-	-	-
858	ORF15_4	1371167	1372675	+	502	ORF15_4	Predicted ORF	-	-	-	-	-	-	-	-	-	-	-	-	-	-	-	-	-	-	-	-	-	-	-	-	-	-	-	-	-	-	-	-
859	ORF15_5	1372743	1373216	+	157	ORF15_5	Predicted ORF	-	-	-	-	-	-	-	-	-	-	-	-	-	-	-	-	-	-	-	-	-	-	-	-	-	-	-	-	-	-	-	-
860	ORF15_6	1373224	1376085	+	953	ORF15_6	Predicted ORF	-	-	-	-	-	-	-	-	-	-	-	-	-	-	-	-	-	-	-	-	-	-	-	-	-	-	-	-	-	-	-	-
861	ORF15_7	1376310	1376741	-	143	ORF15_7	Predicted ORF	-	-	-	-	-	-	-	-	-	-	-	-	-	-	-	-	-	-	-	-	-	-	-	-	-	-	-	-	-	-	-	-
862	ORF15_8	1376928	1377932	+	334	ORF15_8	Predicted ORF	-	-	-	-	-	-	-	-	-	-	-	-	-	-	-	-	-	-	-	-	-	-	-	-	-	-	-	-	-	-	-	-
863	ORF15_9	1378248	1379186	+	312	ORF15_9	Predicted ORF	-	-	-	-	-	-	-	-	-	-	-	-	-	-	-	-	-	-	-	-	-	-	-	-	-	-	-	-	-	-	-	-
864	ORF15_10	1379197	1379661	+	154	ORF15_10	Predicted ORF	-	-	-	-	-	-	-	-	-	-	-	-	-	-	-	-	-	-	-	-	-	-	-	-	-	-	-	-	-	-	-	-
865	ORF15_11	1379795	1380184	+	129	ORF15_11	Predicted ORF	-	-	-	-	-	-	-	-	-	-	-	-	-	-	-	-	-	-	-	-	-	-	-	-	-	-	-	-	-	-	-	-
866	ORF15_13	1382071	1383492	-	473	ORF15_13	Predicted ORF	-	-	-	-	-	-	-	-	-	-	-	-	-	-	-	-	-	-	-	-	-	-	-	-	-	-	-	-	-	-	-	-
867	ORF15_14	1383625	1384365	-	246	ORF15_14	Predicted ORF	-	-	-	-	-	-	-	-	-	-	-	-	-	-	-	-	-	-	-	-	-	-	-	-	-	-	-	-	-	-	-	-
868	ORF15_16	1386052	1387311	-	419	ORF15_16	Predicted ORF	-	-	-	-	-	-	-	-	-	-	-	-	-	-	-	-	-	-	-	-	-	-	-	-	-	-	-	-	-	-	-	-
869	ORF15_18	1389042	1389959	+	305	ORF15_18	Predicted ORF;VF|VFG2025 (gi:15792459) htrB - putative lipid A biosynthesis lauroyl acyltransferase	-	-	-	-	-	-	-	-	-	-	-	-	-	-	-	-	-	-	-	-	-	-	-	-	-	-	-	-	-	-	-	-
870	ORF15_19	1390131	1393058	-	975	ORF15_19	Predicted ORF	-	-	-	-	-	-	-	-	-	-	-	-	-	-	-	-	-	-	-	-	-	-	-	-	-	-	-	-	-	-	-	-
871	ORF15_21	1395230	1397287	+	685	ORF15_21	Predicted ORF	-	-	-	-	-	-	-	-	-	-	-	-	-	-	-	-	-	-	-	-	-	-	-	-	-	-	-	-	-	-	-	-
872	ORF15_22	1397407	1397631	+	74	ORF15_22	Predicted ORF	-	-	-	-	-	-	-	-	-	-	-	-	-	-	-	-	-	-	-	-	-	-	-	-	-	-	-	-	-	-	-	-
873	ORF15_23	1397655	1399187	-	510	ORF15_23	Predicted ORF	-	-	-	-	-	-	-	-	-	-	-	-	-	-	-	-	-	-	-	-	-	-	-	-	-	-	-	-	-	-	-	-
874	ORF15_24	1399359	1400039	+	226	ORF15_24	Predicted ORF	-	-	-	-	-	-	-	-	-	-	-	-	-	-	-	-	-	-	-	-	-	-	-	-	-	-	-	-	-	-	-	-
875	ORF15_25	1400063	1401328	+	421	ORF15_25	Predicted ORF;T4SE|T4SE_29653378|ref|NP_819070.1| low-affinity inorganic phosphate transporter	-	-	-	-	-	-	T4SE_29653378	0.584	-	-	-	-	-	-	-	-	-	-	-	-	-	-	-	-	-	-	-	-	-	-	-	-
876	ORF15_26	1401502	1402122	+	206	ORF15_26	Predicted ORF	-	-	-	-	-	-	-	-	-	-	-	-	-	-	-	-	-	-	-	-	-	-	-	-	-	-	-	-	-	-	-	-
877	ORF15_27	1402248	1403348	-	366	ORF15_27	Predicted ORF	-	-	-	-	-	-	-	-	-	-	-	-	-	-	-	-	-	-	-	-	-	-	-	-	-	-	-	-	-	-	-	-
878	ORF15_30	1406675	1407481	-	268	ORF15_30	Predicted ORF;AR|AR_ZP_04621202 Undecaprenyl-diphosphatase	-	-	AR_YP_001140148	0.745	-	-	-	-	-	-	-	-	-	-	-	-	-	-	-	-	-	-	-	-	-	-	-	-	-	-	-	-
879	ORF15_31	1407609	1408163	-	184	ORF15_31	Predicted ORF	-	-	-	-	-	-	-	-	-	-	-	-	-	-	-	-	-	-	-	-	-	-	-	-	-	-	-	-	-	-	-	-
880	ORF15_32	1408163	1408519	-	118	ORF15_32	Predicted ORF	-	-	-	-	-	-	-	-	-	-	-	-	-	-	-	-	-	-	-	-	-	-	-	-	-	-	-	-	-	-	-	-
881	ORF15_33	1408644	1409258	+	204	ORF15_33	Predicted ORF	-	-	-	-	-	-	-	-	-	-	-	-	-	-	-	-	-	-	-	-	-	-	-	-	-	-	-	-	-	-	-	-
882	ORF15_34	1409510	1410529	-	339	ORF15_34	Predicted ORF	-	-	-	-	-	-	-	-	-	-	-	-	-	-	-	-	-	-	-	-	-	-	-	-	-	-	-	-	-	-	-	-
883	ORF15_35	1410713	1410928	+	71	ORF15_35	Predicted ORF	-	-	-	-	-	-	-	-	-	-	-	-	-	-	-	-	-	-	-	-	-	-	-	-	-	-	-	-	-	-	-	-
884	ORF15_38	1415043	1416245	-	400	ORF15_38	Predicted ORF	-	-	-	-	-	-	-	-	-	-	-	-	-	-	-	-	-	-	-	-	-	-	-	-	-	-	-	-	-	-	-	-
885	ORF15_39	1416461	1416805	-	114	ORF15_39	Predicted ORF	-	-	-	-	-	-	-	-	-	-	-	-	-	-	-	-	-	-	-	-	-	-	-	-	-	-	-	-	-	-	-	-
886	ORF15_40	1416911	1418380	-	489	ORF15_40	Predicted ORF	-	-	-	-	-	-	-	-	-	-	-	-	-	-	-	-	-	-	-	-	-	-	-	-	-	-	-	-	-	-	-	-
887	ORF15_43	1422848	1425307	-	819	ORF15_43	Predicted ORF	-	-	-	-	-	-	-	-	-	-	-	-	-	-	-	-	-	-	-	-	-	-	-	-	-	-	-	-	-	-	-	-
888	ORF15_44	1425498	1426049	+	183	ORF15_44	Predicted ORF	-	-	-	-	-	-	-	-	-	-	-	-	-	-	-	-	-	-	-	-	-	-	-	-	-	-	-	-	-	-	-	-
889	ORF15_45	1426039	1426743	+	234	ORF15_45	Predicted ORF	-	-	-	-	-	-	-	-	-	-	-	-	-	-	-	-	-	-	-	-	-	-	-	-	-	-	-	-	-	-	-	-
890	ORF15_47	1427524	1428411	+	295	ORF15_47	Predicted ORF	-	-	-	-	-	-	-	-	-	-	-	-	-	-	-	-	-	-	-	-	-	-	-	-	-	-	-	-	-	-	-	-
891	ORF15_49	1430088	1430576	+	162	ORF15_49	Predicted ORF	-	-	-	-	-	-	-	-	-	-	-	-	-	-	-	-	-	-	-	-	-	-	-	-	-	-	-	-	-	-	-	-
892	ORF15_50	1430666	1431460	+	264	ORF15_50	Predicted ORF	-	-	-	-	-	-	-	-	-	-	-	-	-	-	-	-	-	-	-	-	-	-	-	-	-	-	-	-	-	-	-	-
893	ORF15_51	1431552	1432406	+	284	ORF15_51	Predicted ORF;VF|VFG1417 (gi:15610738) panC - panC	VFG1417	0.447	-	-	-	-	-	-	-	-	-	-	-	-	-	-	-	-	-	-	-	-	-	-	-	-	-	-	-	-	-	-
894	ORF15_52	1432555	1432935	+	126	ORF15_52	Predicted ORF;VF|VFG1416 (gi:15610737) panD - panD	VFG1416	0.444	-	-	-	-	-	-	-	-	-	-	-	-	-	-	-	-	-	-	-	-	-	-	-	-	-	-	-	-	-	-
895	ORF15_53	1433271	1434785	+	504	ORF15_53	Predicted ORF	-	-	-	-	-	-	-	-	-	-	-	-	-	-	-	-	-	-	-	-	-	-	-	-	-	-	-	-	-	-	-	-
896	ORF15_54	1434942	1435712	-	256	ORF15_54	Predicted ORF	-	-	-	-	-	-	-	-	-	-	-	-	-	-	-	-	-	-	-	-	-	-	-	-	-	-	-	-	-	-	-	-
897	ORF15_58	1438522	1439280	-	252	ORF15_58	Predicted ORF	-	-	-	-	-	-	-	-	-	-	-	-	-	-	-	-	-	-	-	-	-	-	-	-	-	-	-	-	-	-	-	-
898	ORF15_59	1439282	1439932	-	216	ORF15_59	Predicted ORF	-	-	-	-	-	-	-	-	-	-	-	-	-	-	-	-	-	-	-	-	-	-	-	-	-	-	-	-	-	-	-	-
899	ORF16_3	1443037	1444002	+	321	ORF16_3	Predicted ORF	-	-	-	-	-	-	-	-	-	-	-	-	-	-	-	-	-	-	-	-	-	-	-	-	-	-	-	-	-	-	-	-
900	ORF16_5	1445332	1445730	-	132	ORF16_5	Predicted ORF	-	-	-	-	-	-	-	-	-	-	-	-	-	-	-	-	-	-	-	-	-	-	-	-	-	-	-	-	-	-	-	-
901	ORF16_6	1446268	1447389	+	373	ORF16_6	Predicted ORF	-	-	-	-	-	-	-	-	-	-	-	-	-	-	-	-	-	-	-	-	-	-	-	-	-	-	-	-	-	-	-	-
902	ORF16_7	1447555	1448475	+	306	ORF16_7	Predicted ORF	-	-	-	-	-	-	-	-	-	-	-	-	-	-	-	-	-	-	-	-	-	-	-	-	-	-	-	-	-	-	-	-
903	ORF16_8	1448475	1449785	+	436	ORF16_8	Predicted ORF	-	-	-	-	-	-	-	-	-	-	-	-	-	-	-	-	-	-	-	-	-	-	-	-	-	-	-	-	-	-	-	-
904	ORF16_11	1451494	1452234	-	246	ORF16_11	Predicted ORF	-	-	-	-	-	-	-	-	-	-	-	-	-	-	-	-	-	-	-	-	-	-	-	-	-	-	-	-	-	-	-	-
905	ORF16_15	1455093	1456610	+	505	ORF16_15	Predicted ORF	-	-	-	-	-	-	-	-	-	-	-	-	-	-	-	-	-	-	-	-	-	-	-	-	-	-	-	-	-	-	-	-
906	ORF16_16	1456824	1457246	-	140	ORF16_16	Predicted ORF	-	-	-	-	-	-	-	-	-	-	-	-	-	-	-	-	-	-	-	-	-	-	-	-	-	-	-	-	-	-	-	-
907	ORF16_17	1457363	1457956	+	197	ORF16_17	Predicted ORF	-	-	-	-	-	-	-	-	-	-	-	-	-	-	-	-	-	-	-	-	-	-	-	-	-	-	-	-	-	-	-	-
908	ORF16_18	1457950	1458810	+	286	ORF16_18	Predicted ORF	-	-	-	-	-	-	-	-	-	-	-	-	-	-	-	-	-	-	-	-	-	-	-	-	-	-	-	-	-	-	-	-
909	ORF16_19	1458990	1461431	-	813	ORF16_19	Predicted ORF	-	-	-	-	-	-	-	-	-	-	-	-	-	-	-	-	-	-	-	-	-	-	-	-	-	-	-	-	-	-	-	-
910	ORF16_20	1461641	1462000	+	119	ORF16_20	Predicted ORF	-	-	-	-	-	-	-	-	-	-	-	-	-	-	-	-	-	-	-	-	-	-	-	-	-	-	-	-	-	-	-	-
911	ORF16_24	1464987	1465724	-	245	ORF16_24	Predicted ORF	-	-	-	-	-	-	-	-	-	-	-	-	-	-	-	-	-	-	-	-	-	-	-	-	-	-	-	-	-	-	-	-
912	ORF16_25	1465803	1466582	+	259	ORF16_25	Predicted ORF	-	-	-	-	-	-	-	-	-	-	-	-	-	-	-	-	-	-	-	-	-	-	-	-	-	-	-	-	-	-	-	-
913	ORF16_26	1466615	1467046	+	143	ORF16_26	Predicted ORF	-	-	-	-	-	-	-	-	-	-	-	-	-	-	-	-	-	-	-	-	-	-	-	-	-	-	-	-	-	-	-	-
914	ORF16_29	1469419	1469865	-	148	ORF16_29	Predicted ORF	-	-	-	-	-	-	-	-	-	-	-	-	-	-	-	-	-	-	-	-	-	-	-	-	-	-	-	-	-	-	-	-
915	ORF16_30	1470056	1472422	+	788	ORF16_30	Predicted ORF	-	-	-	-	-	-	-	-	-	-	-	-	-	-	-	-	-	-	-	-	-	-	-	-	-	-	-	-	-	-	-	-
916	ORF16_31	1472682	1472792	-	36	ORF16_31	Predicted ORF	-	-	-	-	-	-	-	-	-	-	-	-	-	-	-	-	-	-	-	-	-	-	-	-	-	-	-	-	-	-	-	-
917	ORF16_32	1472960	1474588	-	542	ORF16_32	Predicted ORF	-	-	-	-	-	-	-	-	-	-	-	-	-	-	-	-	-	-	-	-	-	-	-	-	-	-	-	-	-	-	-	-
918	ORF16_33	1474737	1475618	-	293	ORF16_33	Predicted ORF	-	-	-	-	-	-	-	-	-	-	-	-	-	-	-	-	-	-	-	-	-	-	-	-	-	-	-	-	-	-	-	-
919	ORF16_34	1475648	1476064	-	138	ORF16_34	Predicted ORF	-	-	-	-	-	-	-	-	-	-	-	-	-	-	-	-	-	-	-	-	-	-	-	-	-	-	-	-	-	-	-	-
920	ORF16_36	1477422	1479476	+	684	ORF16_36	Predicted ORF;VF|VFG0184 (gi:15598301) xcpQ - general secretion pathway protein D	VFG2047	0.658	-	-	-	-	-	-	-	-	-	-	-	-	-	-	-	-	-	-	-	-	-	-	-	-	-	-	PAI_CAE85234	0.665	-	-
921	ORF16_37	1479473	1481047	+	524	ORF16_37	Predicted ORF;VF|VFG0182 (gi:15598299) xcpR - general secretion pathway protein E	VFG2048	0.66	-	-	-	-	-	-	-	-	-	-	-	-	-	-	-	-	-	-	-	-	-	-	-	-	-	-	PAI_CAE85233	0.666	-	-
922	ORF16_38	1481044	1482267	+	407	ORF16_38	Predicted ORF;VF|VFG0181 (gi:15598298) xcpS - general secretion pathway protein F	VFG2049	0.607	-	-	-	-	-	-	-	-	-	-	-	-	-	-	-	-	-	-	-	-	-	-	-	-	-	-	PAI_CAE85232	0.634	-	-
923	ORF16_39	1482318	1482776	+	152	ORF16_39	Predicted ORF;VF|VFG0180 (gi:15598297) xcpT - general secretion pathway protein G	VFG2050	0.71	-	-	-	-	-	-	-	-	-	-	-	-	-	-	-	-	-	-	-	-	-	-	-	-	-	-	PAI_CAE85231	0.71	-	-
924	ORF16_46	1487667	1488347	-	226	ORF16_46	Predicted ORF	-	-	-	-	-	-	-	-	-	-	-	-	-	-	-	-	-	-	-	-	-	-	-	-	-	-	-	-	-	-	-	-
925	ORF16_47	1488468	1489049	+	193	ORF16_47	Predicted ORF	-	-	-	-	-	-	-	-	-	-	-	-	-	-	-	-	-	-	-	-	-	-	-	-	-	-	-	-	-	-	-	-
926	ORF16_48	1489076	1489888	+	270	ORF16_48	Predicted ORF	-	-	-	-	-	-	-	-	-	-	-	-	-	-	-	-	-	-	-	-	-	-	-	-	-	-	-	-	-	-	-	-
927	ORF16_49	1489978	1490904	+	308	ORF16_49	Predicted ORF	-	-	-	-	-	-	-	-	-	-	-	-	-	-	-	-	-	-	-	-	-	-	-	-	-	-	-	-	-	-	-	-
928	ORF16_50	1491044	1493545	-	833	ORF16_50	Predicted ORF;AR|AR_NP_438601 penicillin-binding protein 1A	-	-	AR_YP_001290033	0.54	-	-	-	-	-	-	-	-	-	-	-	-	-	-	-	-	-	-	-	-	-	-	-	-	-	-	-	-
929	ORF16_51	1493830	1494786	+	318	ORF16_51	Predicted ORF	-	-	-	-	-	-	-	-	-	-	-	-	-	-	-	-	-	-	-	-	-	-	-	-	-	-	-	-	-	-	-	-
930	ORF16_57	1499358	1500443	+	361	ORF16_57	Predicted ORF	-	-	-	-	-	-	-	-	-	-	-	-	-	-	-	-	-	-	-	-	-	-	-	-	-	-	-	-	-	-	-	-
931	ORF16_58	1500454	1502145	+	563	ORF16_58	Predicted ORF	-	-	-	-	-	-	-	-	-	-	-	-	-	-	-	-	-	-	-	-	-	-	-	-	-	-	-	-	-	-	-	-
932	ORF16_60	1503121	1503792	+	223	ORF16_60	Predicted ORF	-	-	-	-	-	-	-	-	-	-	-	-	-	-	-	-	-	-	-	-	-	-	-	-	-	-	-	-	-	-	-	-
933	ORF16_62	1504537	1505559	+	340	ORF16_62	Predicted ORF	-	-	-	-	-	-	-	-	-	-	-	-	-	-	-	-	-	-	-	-	-	-	-	-	-	-	-	-	-	-	-	-
934	ORF16_65	1509568	1509912	+	114	ORF16_65	Predicted ORF	-	-	-	-	-	-	-	-	-	-	-	-	-	-	-	-	-	-	-	-	-	-	-	-	-	-	-	-	-	-	-	-
935	ORF16_66	1510221	1510826	+	201	ORF16_66	Predicted ORF	-	-	-	-	-	-	-	-	-	-	-	-	-	-	-	-	-	-	-	-	-	-	-	-	-	-	-	-	-	-	-	-
936	ORF16_68	1512889	1514058	-	389	ORF16_68	Predicted ORF	-	-	-	-	-	-	-	-	-	-	-	-	-	-	-	-	-	-	-	-	-	-	-	-	-	-	-	-	-	-	-	-
937	ORF16_69	1514371	1514730	+	119	ORF16_69	Predicted ORF	-	-	-	-	-	-	-	-	-	-	-	-	-	-	-	-	-	-	-	-	-	-	-	-	-	-	-	-	-	-	-	-
938	ORF16_70	1514764	1515090	+	108	ORF16_70	Predicted ORF	-	-	-	-	-	-	-	-	-	-	-	-	-	-	-	-	-	-	-	-	-	-	-	-	-	-	-	-	-	-	-	-
939	ORF16_71	1515066	1515290	-	74	ORF16_71	Predicted ORF	-	-	-	-	-	-	-	-	-	-	-	-	-	-	-	-	-	-	-	-	-	-	-	-	-	-	-	-	-	-	-	-
940	ORF16_72	1515428	1516003	+	191	ORF16_72	Predicted ORF	-	-	-	-	-	-	-	-	-	-	-	-	-	-	-	-	-	-	-	-	-	-	-	-	-	-	-	-	-	-	-	-
941	ORF16_74	1517574	1518593	+	339	ORF16_74	Predicted ORF;PAI|PAI_CAA21340 -	-	-	-	-	-	-	-	-	-	-	-	-	-	-	-	-	-	-	-	-	-	-	-	-	-	-	-	-	PAI_CAA21340	0.471	-	-
942	ORF16_76	1520107	1520943	+	278	ORF16_76	Predicted ORF	-	-	-	-	-	-	-	-	-	-	-	-	-	-	-	-	-	-	-	-	-	-	-	-	-	-	-	-	-	-	-	-
943	ORF16_77	1521022	1523076	-	684	ORF16_77	Predicted ORF	-	-	-	-	-	-	-	-	-	-	-	-	-	-	-	-	-	-	-	-	-	-	-	-	-	-	-	-	-	-	-	-
944	ORF16_79	1524116	1524997	-	293	ORF16_79	Predicted ORF	-	-	-	-	-	-	-	-	-	-	-	-	-	-	-	-	-	-	-	-	-	-	-	-	-	-	-	-	-	-	-	-
945	ORF16_80	1525039	1525257	-	72	ORF16_80	Predicted ORF	-	-	-	-	-	-	-	-	-	-	-	-	-	-	-	-	-	-	-	-	-	-	-	-	-	-	-	-	-	-	-	-
946	ORF16_81	1525321	1526286	-	321	ORF16_81	Predicted ORF	-	-	-	-	-	-	-	-	-	-	-	-	-	-	-	-	-	-	-	-	-	-	-	-	-	-	-	-	-	-	-	-
947	ORF16_83	1528590	1529186	+	198	ORF16_83	Predicted ORF	-	-	-	-	-	-	-	-	-	-	-	-	-	-	-	-	-	-	-	-	-	-	-	-	-	-	-	-	-	-	-	-
948	ORF16_85	1530947	1531183	+	78	ORF16_85	Predicted ORF	-	-	-	-	-	-	-	-	-	-	-	-	-	-	-	-	-	-	-	-	-	-	-	-	-	-	-	-	-	-	-	-
949	ORF16_86	1531270	1531878	+	202	ORF16_86	Predicted ORF	-	-	-	-	-	-	-	-	-	-	-	-	-	-	-	-	-	-	-	-	-	-	-	-	-	-	-	-	-	-	-	-
950	ORF16_87	1532047	1532268	-	73	ORF16_87	Predicted ORF	-	-	-	-	-	-	-	-	-	-	-	-	-	-	-	-	-	-	-	-	-	-	-	-	-	-	-	-	-	-	-	-
951	ORF16_89	1533464	1534186	+	240	ORF16_89	Predicted ORF	-	-	-	-	-	-	-	-	-	-	-	-	-	-	-	-	-	-	-	-	-	-	-	-	-	-	-	-	-	-	-	-
952	ORF16_90	1534158	1534583	+	141	ORF16_90	Predicted ORF	-	-	-	-	-	-	-	-	-	-	-	-	-	-	-	-	-	-	-	-	-	-	-	-	-	-	-	-	-	-	-	-
953	ORF16_91	1534606	1534965	+	119	ORF16_91	Predicted ORF	-	-	-	-	-	-	-	-	-	-	-	-	-	-	-	-	-	-	-	-	-	-	-	-	-	-	-	-	-	-	-	-
954	ORF16_92	1535078	1535368	+	96	ORF16_92	Predicted ORF	-	-	-	-	-	-	-	-	-	-	-	-	-	-	-	-	-	-	-	-	-	-	-	-	-	-	-	-	-	-	-	-
955	ORF16_93	1535567	1535941	+	124	ORF16_93	Predicted ORF	-	-	-	-	-	-	-	-	-	-	-	-	-	-	-	-	-	-	-	-	-	-	-	-	-	-	-	-	-	-	-	-
956	ORF16_94	1536033	1536503	+	156	ORF16_94	Predicted ORF	-	-	-	-	-	-	-	-	-	-	-	-	-	-	-	-	-	-	-	-	-	-	-	-	-	-	-	-	-	-	-	-
957	ORF17_1	1538820	1538882	-	20	ORF17_1	Predicted ORF	-	-	-	-	-	-	-	-	-	-	-	-	-	-	-	-	-	-	-	-	-	-	-	-	-	-	-	-	-	-	-	-
958	ORF17_2	1539058	1540992	+	644	ORF17_2	Predicted ORF	-	-	-	-	-	-	-	-	-	-	-	-	-	-	-	-	-	-	-	-	-	-	-	-	-	-	-	-	-	-	-	-
959	ORF17_6	1546596	1547426	+	276	ORF17_6	Predicted ORF	-	-	-	-	-	-	-	-	-	-	-	-	-	-	-	-	-	-	-	-	-	-	-	-	-	-	-	-	-	-	-	-
960	ORF17_7	1547448	1548335	-	295	ORF17_7	Predicted ORF	-	-	-	-	-	-	-	-	-	-	-	-	-	-	-	-	-	-	-	-	-	-	-	-	-	-	-	-	-	-	-	-
961	ORF17_8	1548882	1550792	+	636	ORF17_8	Predicted ORF	-	-	-	-	-	-	-	-	-	-	-	-	-	-	-	-	-	-	-	-	-	-	-	-	-	-	-	-	-	-	-	-
962	ORF17_9	1550938	1551828	+	296	ORF17_9	Predicted ORF	-	-	-	-	-	-	-	-	-	-	-	-	-	-	-	-	-	-	-	-	-	-	-	-	-	-	-	-	-	-	-	-
963	ORF17_10	1552032	1552871	+	279	ORF17_10	Predicted ORF	-	-	-	-	-	-	-	-	-	-	-	-	-	-	-	-	-	-	-	-	-	-	-	-	-	-	-	-	-	-	-	-
964	ORF17_11	1553548	1555008	+	486	ORF17_11	Predicted ORF	-	-	-	-	-	-	-	-	-	-	-	-	-	-	-	-	-	-	-	-	-	-	-	-	-	-	-	-	-	-	-	-
965	ORF17_12	1555099	1556313	+	404	ORF17_12	Predicted ORF	-	-	-	-	-	-	-	-	-	-	-	-	-	-	-	-	-	-	-	-	-	-	-	-	-	-	-	-	-	-	-	-
966	ORF17_13	1556898	1557662	+	254	ORF17_13	Predicted ORF	-	-	-	-	-	-	-	-	-	-	-	-	-	-	-	-	-	-	-	-	-	-	-	-	-	-	-	-	-	-	-	-
967	ORF17_14	1557813	1559120	-	435	ORF17_14	Predicted ORF	-	-	-	-	-	-	-	-	-	-	-	-	-	-	-	-	-	-	-	-	-	-	-	-	-	-	-	-	-	-	-	-
968	ORF17_15	1559598	1560860	-	420	ORF17_15	Predicted ORF	-	-	-	-	-	-	-	-	-	-	-	-	-	-	-	-	-	-	-	-	-	-	-	-	-	-	-	-	-	-	-	-
969	ORF17_16	1561351	1561641	+	96	ORF17_16	Predicted ORF	-	-	-	-	-	-	-	-	-	-	-	-	-	-	-	-	-	-	-	-	-	-	-	-	-	-	-	-	-	-	-	-
970	ORF17_17	1561836	1563563	-	575	ORF17_17	Predicted ORF	-	-	-	-	-	-	-	-	-	-	-	-	-	-	-	-	-	-	-	-	-	-	-	-	-	-	-	-	-	-	-	-
971	ORF17_18	1564080	1565390	+	436	ORF17_18	Predicted ORF	-	-	-	-	-	-	-	-	-	-	-	-	-	-	-	-	-	-	-	-	-	-	-	-	-	-	-	-	-	-	-	-
972	ORF17_20	1567632	1568090	+	152	ORF17_20	Predicted ORF	-	-	-	-	-	-	-	-	-	-	-	-	-	-	-	-	-	-	-	-	-	-	-	-	-	-	-	-	-	-	-	-
973	ORF17_21	1568219	1570996	-	925	ORF17_21	Predicted ORF	-	-	-	-	-	-	-	-	-	-	-	-	-	-	-	-	-	-	-	-	-	-	-	-	-	-	-	-	-	-	-	-
974	ORF17_22	1571265	1571741	+	158	ORF17_22	Predicted ORF	-	-	-	-	-	-	-	-	-	-	-	-	-	-	-	-	-	-	-	-	-	-	-	-	-	-	-	-	-	-	-	-
975	ORF17_23	1571826	1572350	-	174	ORF17_23	Predicted ORF	-	-	-	-	-	-	-	-	-	-	-	-	-	-	-	-	-	-	-	-	-	-	-	-	-	-	-	-	-	-	-	-
976	ORF17_24	1572427	1573359	+	310	ORF17_24	Predicted ORF	-	-	-	-	-	-	-	-	-	-	-	-	-	-	-	-	-	-	-	-	-	-	-	-	-	-	-	-	-	-	-	-
977	ORF17_25	1573524	1574624	+	366	ORF17_25	Predicted ORF;PAI|PAI_ABW69089 hypothetical protein	-	-	-	-	-	-	-	-	-	-	-	-	-	-	-	-	-	-	-	-	-	-	-	-	-	-	-	-	PAI_ABW69089	0.779	-	-
978	ORF17_27	1575807	1577168	-	453	ORF17_27	Predicted ORF	-	-	-	-	-	-	-	-	-	-	-	-	-	-	-	-	-	-	-	-	-	-	-	-	-	-	-	-	-	-	-	-
979	ORF17_30	1579827	1580969	+	380	ORF17_30	Predicted ORF	-	-	-	-	-	-	-	-	-	-	-	-	-	-	-	-	-	-	-	-	-	-	-	-	-	-	-	-	-	-	-	-
980	ORF17_31	1580925	1581056	-	43	ORF17_31	Predicted ORF	-	-	-	-	-	-	-	-	-	-	-	-	-	-	-	-	-	-	-	-	-	-	-	-	-	-	-	-	-	-	-	-
981	ORF17_32	1581097	1581897	+	266	ORF17_32	Predicted ORF;PAI|PAI_ABW69077 hypothetical protein	-	-	-	-	-	-	-	-	-	-	-	-	-	-	-	-	-	-	-	-	-	-	-	-	-	-	-	-	PAI_ABW69077	0.598	-	-
982	ORF17_33	1582096	1582716	-	206	ORF17_33	Predicted ORF	-	-	-	-	-	-	-	-	-	-	-	-	-	-	-	-	-	-	-	-	-	-	-	-	-	-	-	-	-	-	-	-
983	ORF17_34	1583385	1583660	+	91	ORF17_34	Predicted ORF	-	-	-	-	-	-	-	-	-	-	-	-	-	-	-	-	-	-	-	-	-	-	-	-	-	-	-	-	-	-	-	-
984	ORF17_35	1583851	1585935	-	694	ORF17_35	Predicted ORF	-	-	-	-	-	-	-	-	-	-	-	-	-	-	-	-	-	-	-	-	-	-	-	-	-	-	-	-	-	-	-	-
985	ORF17_37	1587484	1588410	+	308	ORF17_37	Predicted ORF	-	-	-	-	-	-	-	-	-	-	-	-	-	-	-	-	-	-	-	-	-	-	-	-	-	-	-	-	-	-	-	-
986	ORF17_43	1594796	1595497	-	233	ORF17_43	Predicted ORF	-	-	-	-	-	-	-	-	-	-	-	-	-	-	-	-	-	-	-	-	-	-	-	-	-	-	-	-	-	-	-	-
987	ORF17_44	1595509	1595913	-	134	ORF17_44	Predicted ORF	-	-	-	-	-	-	-	-	-	-	-	-	-	-	-	-	-	-	-	-	-	-	-	-	-	-	-	-	-	-	-	-
988	ORF17_45	1596048	1596686	-	212	ORF17_45	Predicted ORF	-	-	-	-	-	-	-	-	-	-	-	-	-	-	-	-	-	-	-	-	-	-	-	-	-	-	-	-	-	-	-	-
989	ORF17_46	1596946	1597638	-	230	ORF17_46	Predicted ORF	-	-	-	-	-	-	-	-	-	-	-	-	-	-	-	-	-	-	-	-	-	-	-	-	-	-	-	-	-	-	-	-
990	ORF17_47	1597649	1598038	-	129	ORF17_47	Predicted ORF	-	-	-	-	-	-	-	-	-	-	-	-	-	-	-	-	-	-	-	-	-	-	-	-	-	-	-	-	-	-	-	-
991	ORF17_49	1599596	1600609	+	337	ORF17_49	Predicted ORF	-	-	-	-	-	-	-	-	-	-	-	-	-	-	-	-	-	-	-	-	-	-	-	-	-	-	-	-	-	-	-	-
992	ORF17_51	1604828	1605613	+	261	ORF17_51	Predicted ORF	-	-	-	-	-	-	-	-	-	-	-	-	-	-	-	-	-	-	-	-	-	-	-	-	-	-	-	-	-	-	-	-
993	ORF17_52	1605782	1606432	+	216	ORF17_52	Predicted ORF	-	-	-	-	-	-	-	-	-	-	-	-	-	-	-	-	-	-	-	-	-	-	-	-	-	-	-	-	-	-	-	-
994	ORF17_53	1606562	1607500	+	312	ORF17_53	Predicted ORF	-	-	-	-	-	-	-	-	-	-	-	-	-	-	-	-	-	-	-	-	-	-	-	-	-	-	-	-	-	-	-	-
995	ORF17_54	1607558	1608883	+	441	ORF17_54	Predicted ORF	-	-	-	-	-	-	-	-	-	-	-	-	-	-	-	-	-	-	-	-	-	-	-	-	-	-	-	-	-	-	-	-
996	ORF17_55	1608885	1609607	+	240	ORF17_55	Predicted ORF	-	-	-	-	-	-	-	-	-	-	-	-	-	-	-	-	-	-	-	-	-	-	-	-	-	-	-	-	-	-	-	-
997	ORF17_56	1609691	1610185	+	164	ORF17_56	Predicted ORF	-	-	-	-	-	-	-	-	-	-	-	-	-	-	-	-	-	-	-	-	-	-	-	-	-	-	-	-	-	-	-	-
998	ORF17_57	1610239	1611750	+	503	ORF17_57	Predicted ORF	-	-	-	-	-	-	-	-	-	-	-	-	-	-	-	-	-	-	-	-	-	-	-	-	-	-	-	-	-	-	-	-
999	ORF17_58	1611953	1612432	+	159	ORF17_58	Predicted ORF	-	-	-	-	-	-	-	-	-	-	-	-	-	-	-	-	-	-	-	-	-	-	-	-	-	-	-	-	-	-	-	-
1000	ORF17_59	1612414	1612992	+	192	ORF17_59	Predicted ORF	-	-	-	-	-	-	-	-	-	-	-	-	-	-	-	-	-	-	-	-	-	-	-	-	-	-	-	-	-	-	-	-
1001	ORF17_60	1613352	1614719	+	455	ORF17_60	Predicted ORF	-	-	-	-	-	-	-	-	-	-	-	-	-	-	-	-	-	-	-	-	-	-	-	-	-	-	-	-	-	-	-	-
1002	ORF17_61	1614999	1615286	-	95	ORF17_61	Predicted ORF	-	-	-	-	-	-	-	-	-	-	-	-	-	-	-	-	-	-	-	-	-	-	-	-	-	-	-	-	-	-	-	-
1003	ORF17_62	1616312	1616485	+	57	ORF17_62	Predicted ORF	-	-	-	-	-	-	-	-	-	-	-	-	-	-	-	-	-	-	-	-	-	-	-	-	-	-	-	-	-	-	-	-
1004	ORF17_64	1617215	1618282	-	355	ORF17_64	Predicted ORF	-	-	-	-	-	-	-	-	-	-	-	-	-	-	-	-	-	-	-	-	-	-	-	-	-	-	-	-	-	-	-	-
1005	ORF17_65	1618279	1618773	-	164	ORF17_65	Predicted ORF	-	-	-	-	-	-	-	-	-	-	-	-	-	-	-	-	-	-	-	-	-	-	-	-	-	-	-	-	-	-	-	-
1006	ORF17_66	1619034	1620182	+	382	ORF17_66	Predicted ORF	-	-	-	-	-	-	-	-	-	-	-	-	-	-	-	-	-	-	-	-	-	-	-	-	-	-	-	-	-	-	-	-
1007	ORF17_67	1620383	1621120	-	245	ORF17_67	Predicted ORF	-	-	-	-	-	-	-	-	-	-	-	-	-	-	-	-	-	-	-	-	-	-	-	-	-	-	-	-	-	-	-	-
1008	ORF17_69	1622094	1623407	+	437	ORF17_69	Predicted ORF	-	-	-	-	-	-	-	-	-	-	-	-	-	-	-	-	-	-	-	-	-	-	-	-	-	-	-	-	-	-	-	-
1009	ORF17_70	1623499	1624383	-	294	ORF17_70	Predicted ORF	-	-	-	-	-	-	-	-	-	-	-	-	-	-	-	-	-	-	-	-	-	-	-	-	-	-	-	-	-	-	-	-
1010	ORF17_71	1624501	1625358	-	285	ORF17_71	Predicted ORF	-	-	-	-	-	-	-	-	-	-	-	-	-	-	-	-	-	-	-	-	-	-	-	-	-	-	-	-	-	-	-	-
1011	ORF18_1	1625926	1627197	-	423	ORF18_1	Predicted ORF	-	-	-	-	-	-	-	-	-	-	-	-	-	-	-	-	-	-	-	-	-	-	-	-	-	-	-	-	-	-	-	-
1012	ORF18_2	1627254	1627487	+	77	ORF18_2	Predicted ORF	-	-	-	-	-	-	-	-	-	-	-	-	-	-	-	-	-	-	-	-	-	-	-	-	-	-	-	-	-	-	-	-
1013	ORF18_3	1627403	1627612	-	69	ORF18_3	Predicted ORF	-	-	-	-	-	-	-	-	-	-	-	-	-	-	-	-	-	-	-	-	-	-	-	-	-	-	-	-	-	-	-	-
1014	ORF18_4	1627893	1630139	+	748	ORF18_4	Predicted ORF	-	-	-	-	-	-	-	-	-	-	-	-	-	-	-	-	-	-	-	-	-	-	-	-	-	-	-	-	-	-	-	-
1015	ORF18_6	1631625	1632533	+	302	ORF18_6	Predicted ORF	-	-	-	-	-	-	-	-	-	-	-	-	-	-	-	-	-	-	-	-	-	-	-	-	-	-	-	-	-	-	-	-
1016	ORF18_7	1632618	1633148	+	176	ORF18_7	Predicted ORF	-	-	-	-	-	-	-	-	-	-	-	-	-	-	-	-	-	-	-	-	-	-	-	-	-	-	-	-	-	-	-	-
1017	ORF18_9	1634702	1635604	+	300	ORF18_9	Predicted ORF	-	-	-	-	-	-	-	-	-	-	-	-	-	-	-	-	-	-	-	-	-	-	-	-	-	-	-	-	-	-	-	-
1018	ORF18_10	1635728	1636213	+	161	ORF18_10	Predicted ORF	-	-	-	-	-	-	-	-	-	-	-	-	-	-	-	-	-	-	-	-	-	-	-	-	-	-	-	-	-	-	-	-
1019	ORF18_11	1636369	1636608	-	79	ORF18_11	Predicted ORF	-	-	-	-	-	-	-	-	-	-	-	-	-	-	-	-	-	-	-	-	-	-	-	-	-	-	-	-	-	-	-	-
1020	ORF18_12	1637138	1637980	+	280	ORF18_12	Predicted ORF	-	-	-	-	-	-	-	-	-	-	-	-	-	-	-	-	-	-	-	-	-	-	-	-	-	-	-	-	-	-	-	-
1021	ORF18_14	1639905	1640915	+	336	ORF18_14	Predicted ORF	-	-	-	-	-	-	-	-	-	-	-	-	-	-	-	-	-	-	-	-	-	-	-	-	-	-	-	-	-	-	-	-
1022	ORF18_15	1641030	1642238	-	402	ORF18_15	Predicted ORF;AR|AR_YP_002245675 multidrug resistance protein D	-	-	AR_YP_001451632	0.552	-	-	-	-	-	-	-	-	-	-	-	-	-	-	-	-	-	-	-	-	-	-	-	-	-	-	-	-
1023	ORF18_16	1642621	1643268	+	215	ORF18_16	Predicted ORF	-	-	-	-	-	-	-	-	-	-	-	-	-	-	-	-	-	-	-	-	-	-	-	-	-	-	-	-	-	-	-	-
1024	ORF18_17	1643279	1644025	+	248	ORF18_17	Predicted ORF	-	-	-	-	-	-	-	-	-	-	-	-	-	-	-	-	-	-	-	-	-	-	-	-	-	-	-	-	-	-	-	-
1025	ORF18_18	1644132	1644545	-	137	ORF18_18	Predicted ORF	-	-	-	-	-	-	-	-	-	-	-	-	-	-	-	-	-	-	-	-	-	-	-	-	-	-	-	-	-	-	-	-
1026	ORF18_20	1645504	1646268	+	254	ORF18_20	Predicted ORF	-	-	-	-	-	-	-	-	-	-	-	-	-	-	-	-	-	-	-	-	-	-	-	-	-	-	-	-	-	-	-	-
1027	ORF18_21	1646603	1647565	-	320	ORF18_21	Predicted ORF	-	-	-	-	-	-	-	-	-	-	-	-	-	-	-	-	-	-	-	-	-	-	-	-	-	-	-	-	-	-	-	-
1028	ORF18_22	1647842	1648753	-	303	ORF18_22	Predicted ORF	-	-	-	-	-	-	-	-	-	-	-	-	-	-	-	-	-	-	-	-	-	-	-	-	-	-	-	-	-	-	-	-
1029	ORF18_23	1648900	1649412	-	170	ORF18_23	Predicted ORF	-	-	-	-	-	-	-	-	-	-	-	-	-	-	-	-	-	-	-	-	-	-	-	-	-	-	-	-	-	-	-	-
1030	ORF18_26	1651892	1652359	+	155	ORF18_26	Predicted ORF	-	-	-	-	-	-	-	-	-	-	-	-	-	-	-	-	-	-	-	-	-	-	-	-	-	-	-	-	-	-	-	-
1031	ORF18_28	1653355	1654359	-	334	ORF18_28	Predicted ORF	-	-	-	-	-	-	-	-	-	-	-	-	-	-	-	-	-	-	-	-	-	-	-	-	-	-	-	-	-	-	-	-
1032	ORF18_29	1654381	1654845	-	154	ORF18_29	Predicted ORF	-	-	-	-	-	-	-	-	-	-	-	-	-	-	-	-	-	-	-	-	-	-	-	-	-	-	-	-	-	-	-	-
1033	ORF18_32	1656107	1657651	+	514	ORF18_32	Predicted ORF	-	-	-	-	-	-	-	-	-	-	-	-	-	-	-	-	-	-	-	-	-	-	-	-	-	-	-	-	-	-	-	-
1034	ORF18_34	1658885	1660081	+	398	ORF18_34	Predicted ORF	-	-	-	-	-	-	-	-	-	-	-	-	-	-	-	-	-	-	-	-	-	-	-	-	-	-	-	-	-	-	-	-
1035	ORF18_40	1664884	1666095	+	403	ORF18_40	Predicted ORF	-	-	-	-	-	-	-	-	-	-	-	-	-	-	-	-	-	-	-	-	-	-	-	-	-	-	-	-	-	-	-	-
1036	ORF18_41	1666130	1667191	+	353	ORF18_41	Predicted ORF;VF|VFG1948 (gi:15792472) waaF - ADP-heptose--LPS heptosyltransferase	VFG0143	0.507	-	-	-	-	-	-	-	-	-	-	-	-	-	-	-	-	-	-	-	-	-	-	-	-	-	-	-	-	-	-
1037	ORF18_42	1667198	1667980	+	260	ORF18_42	Predicted ORF	-	-	-	-	-	-	-	-	-	-	-	-	-	-	-	-	-	-	-	-	-	-	-	-	-	-	-	-	-	-	-	-
1038	ORF18_43	1667980	1669260	+	426	ORF18_43	Predicted ORF;VF|VFG0330 (gi:16272595) kdtA - 3-deoxy-d-manno-octulosonic-acid transferase	VFG0141	0.427	-	-	-	-	-	-	-	-	-	-	-	-	-	-	-	-	-	-	-	-	-	-	-	-	-	-	-	-	-	-
1039	ORF18_45	1669628	1671211	+	527	ORF18_45	Predicted ORF	-	-	-	-	-	-	-	-	-	-	-	-	-	-	-	-	-	-	-	-	-	-	-	-	-	-	-	-	-	-	-	-
1040	ORF18_46	1671208	1671951	+	247	ORF18_46	Predicted ORF	-	-	-	-	-	-	-	-	-	-	-	-	-	-	-	-	-	-	-	-	-	-	-	-	-	-	-	-	-	-	-	-
1041	ORF18_47	1671948	1672892	+	314	ORF18_47	Predicted ORF	-	-	-	-	-	-	-	-	-	-	-	-	-	-	-	-	-	-	-	-	-	-	-	-	-	-	-	-	-	-	-	-
1042	ORF18_50	1675841	1676542	-	233	ORF18_50	Predicted ORF	-	-	-	-	-	-	-	-	-	-	-	-	-	-	-	-	-	-	-	-	-	-	-	-	-	-	-	-	-	-	-	-
1043	ORF18_54	1679655	1680137	+	160	ORF18_54	Predicted ORF;VF|VFG0320 (gi:15646084) kdtB - lipopolysaccharide core biosynthesis protein (kdtB)	VFG0320	0.431	-	-	-	-	-	-	-	-	-	-	-	-	-	-	-	-	-	-	-	-	-	-	-	-	-	-	-	-	-	-
1044	ORF18_55	1680134	1680979	-	281	ORF18_55	Predicted ORF	-	-	-	-	-	-	-	-	-	-	-	-	-	-	-	-	-	-	-	-	-	-	-	-	-	-	-	-	-	-	-	-
1045	ORF18_57	1682022	1682672	+	216	ORF18_57	Predicted ORF	-	-	-	-	-	-	-	-	-	-	-	-	-	-	-	-	-	-	-	-	-	-	-	-	-	-	-	-	-	-	-	-
1046	ORF18_58	1682675	1684402	+	575	ORF18_58	Predicted ORF	-	-	-	-	-	-	-	-	-	-	-	-	-	-	-	-	-	-	-	-	-	-	-	-	-	-	-	-	-	-	-	-
1047	ORF18_59	1684532	1684699	-	55	ORF18_59	Predicted ORF	-	-	-	-	-	-	-	-	-	-	-	-	-	-	-	-	-	-	-	-	-	-	-	-	-	-	-	-	-	-	-	-
1048	ORF18_60	1684711	1684947	-	78	ORF18_60	Predicted ORF	-	-	-	-	-	-	-	-	-	-	-	-	-	-	-	-	-	-	-	-	-	-	-	-	-	-	-	-	-	-	-	-
1049	ORF18_62	1686234	1687457	+	407	ORF18_62	Predicted ORF	-	-	-	-	-	-	-	-	-	-	-	-	-	-	-	-	-	-	-	-	-	-	-	-	-	-	-	-	-	-	-	-
1050	ORF18_63	1687454	1687909	+	151	ORF18_63	Predicted ORF;Prophage|Prophage_38639933 NC_005260 hypothetical protein {Aeromonas phage Aeh1}	-	-	-	-	-	-	-	-	-	-	-	-	Prophage_84662702	0.603	-	-	-	-	-	-	-	-	-	-	-	-	-	-	-	-	-	-
1051	ORF18_64	1688006	1688596	+	196	ORF18_64	Predicted ORF	-	-	-	-	-	-	-	-	-	-	-	-	-	-	-	-	-	-	-	-	-	-	-	-	-	-	-	-	-	-	-	-
1052	ORF18_65	1688962	1689345	+	127	ORF18_65	Predicted ORF	-	-	-	-	-	-	-	-	-	-	-	-	-	-	-	-	-	-	-	-	-	-	-	-	-	-	-	-	-	-	-	-
1053	ORF18_66	1689361	1689759	+	132	ORF18_66	Predicted ORF	-	-	-	-	-	-	-	-	-	-	-	-	-	-	-	-	-	-	-	-	-	-	-	-	-	-	-	-	-	-	-	-
1054	ORF18_68	1690918	1691571	-	217	ORF18_68	Predicted ORF	-	-	-	-	-	-	-	-	-	-	-	-	-	-	-	-	-	-	-	-	-	-	-	-	-	-	-	-	-	-	-	-
1055	ORF18_69	1691806	1692522	-	238	ORF18_69	Predicted ORF	-	-	-	-	-	-	-	-	-	-	-	-	-	-	-	-	-	-	-	-	-	-	-	-	-	-	-	-	-	-	-	-
1056	ORF18_70	1692689	1693552	+	287	ORF18_70	Predicted ORF	-	-	-	-	-	-	-	-	-	-	-	-	-	-	-	-	-	-	-	-	-	-	-	-	-	-	-	-	-	-	-	-
1057	ORF18_71	1693621	1693764	-	47	ORF18_71	Predicted ORF	-	-	-	-	-	-	-	-	-	-	-	-	-	-	-	-	-	-	-	-	-	-	-	-	-	-	-	-	-	-	-	-
1058	ORF18_72	1694137	1694340	+	67	ORF18_72	Predicted ORF	-	-	-	-	-	-	-	-	-	-	-	-	-	-	-	-	-	-	-	-	-	-	-	-	-	-	-	-	-	-	-	-
1059	ORF18_75	1696684	1698135	-	483	ORF18_75	Predicted ORF	-	-	-	-	-	-	-	-	-	-	-	-	-	-	-	-	-	-	-	-	-	-	-	-	-	-	-	-	-	-	-	-
1060	ORF18_79	1702554	1703216	+	220	ORF18_79	Predicted ORF	-	-	-	-	-	-	-	-	-	-	-	-	-	-	-	-	-	-	-	-	-	-	-	-	-	-	-	-	-	-	-	-
1061	ORF18_80	1703280	1703555	+	91	ORF18_80	Predicted ORF	-	-	-	-	-	-	-	-	-	-	-	-	-	-	-	-	-	-	-	-	-	-	-	-	-	-	-	-	-	-	-	-
1062	ORF18_84	1708791	1708937	+	48	ORF18_84	Predicted ORF	-	-	-	-	-	-	-	-	-	-	-	-	-	-	-	-	-	-	-	-	-	-	-	-	-	-	-	-	-	-	-	-
1063	ORF18_85	1708934	1710328	+	464	ORF18_85	Predicted ORF	-	-	-	-	-	-	-	-	-	-	-	-	-	-	-	-	-	-	-	-	-	-	-	-	-	-	-	-	-	-	-	-
1064	ORF18_86	1710477	1710770	+	97	ORF18_86	Predicted ORF	-	-	-	-	-	-	-	-	-	-	-	-	-	-	-	-	-	-	-	-	-	-	-	-	-	-	-	-	-	-	-	-
1065	ORF18_87	1710816	1712882	+	688	ORF18_87	Predicted ORF	-	-	-	-	-	-	-	-	-	-	-	-	-	-	-	-	-	-	-	-	-	-	-	-	-	-	-	-	-	-	-	-
1066	ORF18_88	1712816	1713760	-	314	ORF18_88	Predicted ORF	-	-	-	-	-	-	-	-	-	-	-	-	-	-	-	-	-	-	-	-	-	-	-	-	-	-	-	-	-	-	-	-
1067	ORF18_89	1713872	1714306	-	144	ORF18_89	Predicted ORF	-	-	-	-	-	-	-	-	-	-	-	-	-	-	-	-	-	-	-	-	-	-	-	-	-	-	-	-	-	-	-	-
1068	ORF18_94	1719493	1720902	+	469	ORF18_94	Predicted ORF;VF|VFG1399 (gi:15609357) glnA1 - glnA1	VFG1399	0.53	-	-	-	-	-	-	-	-	-	-	-	-	-	-	-	-	-	-	-	-	-	-	-	-	-	-	-	-	-	-
1069	ORF18_95	1721179	1721781	+	200	ORF18_95	Predicted ORF	-	-	-	-	-	-	-	-	-	-	-	-	-	-	-	-	-	-	-	-	-	-	-	-	-	-	-	-	-	-	-	-
1070	ORF18_98	1724621	1725628	+	335	ORF18_98	Predicted ORF	-	-	-	-	-	-	-	-	-	-	-	-	-	-	-	-	-	-	-	-	-	-	-	-	-	-	-	-	-	-	-	-
1071	ORF18_100	1727210	1727680	-	156	ORF18_100	Predicted ORF	-	-	-	-	-	-	-	-	-	-	-	-	-	-	-	-	-	-	-	-	-	-	-	-	-	-	-	-	-	-	-	-
1072	ORF18_101	1727680	1728234	-	184	ORF18_101	Predicted ORF	-	-	-	-	-	-	-	-	-	-	-	-	-	-	-	-	-	-	-	-	-	-	-	-	-	-	-	-	-	-	-	-
1073	ORF18_103	1729572	1730225	+	217	ORF18_103	Predicted ORF	-	-	-	-	-	-	-	-	-	-	-	-	-	-	-	-	-	-	-	-	-	-	-	-	-	-	-	-	-	-	-	-
1074	ORF18_105	1734751	1735965	-	404	ORF18_105	Predicted ORF	-	-	-	-	-	-	-	-	-	-	-	-	-	-	-	-	-	-	-	-	-	-	-	-	-	-	-	-	-	-	-	-
1075	ORF18_107	1737904	1738248	-	114	ORF18_107	Predicted ORF	-	-	-	-	-	-	-	-	-	-	-	-	-	-	-	-	-	-	-	-	-	-	-	-	-	-	-	-	-	-	-	-
1076	ORF18_108	1738305	1738832	-	175	ORF18_108	Predicted ORF	-	-	-	-	-	-	-	-	-	-	-	-	-	-	-	-	-	-	-	-	-	-	-	-	-	-	-	-	-	-	-	-
1077	ORF18_109	1738934	1739974	-	346	ORF18_109	Predicted ORF	-	-	-	-	-	-	-	-	-	-	-	-	-	-	-	-	-	-	-	-	-	-	-	-	-	-	-	-	-	-	-	-
1078	ORF18_111	1741522	1741953	+	143	ORF18_111	Predicted ORF	-	-	-	-	-	-	-	-	-	-	-	-	-	-	-	-	-	-	-	-	-	-	-	-	-	-	-	-	-	-	-	-
1079	ORF18_112	1742293	1743051	-	252	ORF18_112	Predicted ORF	-	-	-	-	-	-	-	-	-	-	-	-	-	-	-	-	-	-	-	-	-	-	-	-	-	-	-	-	-	-	-	-
1080	ORF18_113	1743181	1745244	-	687	ORF18_113	Predicted ORF	-	-	-	-	-	-	-	-	-	-	-	-	-	-	-	-	-	-	-	-	-	-	-	-	-	-	-	-	-	-	-	-
1081	ORF18_114	1745349	1746191	+	280	ORF18_114	Predicted ORF	-	-	-	-	-	-	-	-	-	-	-	-	-	-	-	-	-	-	-	-	-	-	-	-	-	-	-	-	-	-	-	-
1082	ORF18_117	1749643	1749852	-	69	ORF18_117	Predicted ORF	-	-	-	-	-	-	-	-	-	-	-	-	-	-	-	-	-	-	-	-	-	-	-	-	-	-	-	-	-	-	-	-
1083	ORF18_118	1750203	1750694	-	163	ORF18_118	Predicted ORF	-	-	-	-	-	-	-	-	-	-	-	-	-	-	-	-	-	-	-	-	-	-	-	-	-	-	-	-	-	-	-	-
1084	ORF19_1	1750696	1752651	-	651	ORF19_1	Predicted ORF	-	-	-	-	-	-	-	-	-	-	-	-	-	-	-	-	-	-	-	-	-	-	-	-	-	-	-	-	-	-	-	-
1085	ORF19_3	1753857	1755965	-	702	ORF19_3	Predicted ORF	-	-	-	-	-	-	-	-	-	-	-	-	-	-	-	-	-	-	-	-	-	-	-	-	-	-	-	-	-	-	-	-
1086	ORF19_4	1755962	1757296	-	444	ORF19_4	Predicted ORF	-	-	-	-	-	-	-	-	-	-	-	-	-	-	-	-	-	-	-	-	-	-	-	-	-	-	-	-	-	-	-	-
1087	ORF19_6	1758435	1759526	-	363	ORF19_6	Predicted ORF	-	-	-	-	-	-	-	-	-	-	-	-	-	-	-	-	-	-	-	-	-	-	-	-	-	-	-	-	-	-	-	-
1088	ORF19_7	1759659	1760249	-	196	ORF19_7	Predicted ORF	-	-	-	-	-	-	-	-	-	-	-	-	-	-	-	-	-	-	-	-	-	-	-	-	-	-	-	-	-	-	-	-
1089	ORF19_9	1761506	1762393	-	295	ORF19_9	Predicted ORF	-	-	-	-	-	-	-	-	-	-	-	-	-	-	-	-	-	-	-	-	-	-	-	-	-	-	-	-	-	-	-	-
1090	ORF19_10	1762377	1762982	-	201	ORF19_10	Predicted ORF	-	-	-	-	-	-	-	-	-	-	-	-	-	-	-	-	-	-	-	-	-	-	-	-	-	-	-	-	-	-	-	-
1091	ORF19_11	1763154	1764407	+	417	ORF19_11	Predicted ORF	-	-	-	-	-	-	-	-	-	-	-	-	-	-	-	-	-	-	-	-	-	-	-	-	-	-	-	-	-	-	-	-
1092	ORF19_13	1765528	1766388	+	286	ORF19_13	Predicted ORF	-	-	-	-	-	-	-	-	-	-	-	-	-	-	-	-	-	-	-	-	-	-	-	-	-	-	-	-	-	-	-	-
1093	ORF19_14	1766481	1766858	+	125	ORF19_14	Predicted ORF	-	-	-	-	-	-	-	-	-	-	-	-	-	-	-	-	-	-	-	-	-	-	-	-	-	-	-	-	-	-	-	-
1094	ORF19_15	1766923	1767783	+	286	ORF19_15	Predicted ORF	-	-	-	-	-	-	-	-	-	-	-	-	-	-	-	-	-	-	-	-	-	-	-	-	-	-	-	-	-	-	-	-
1095	ORF19_16	1767811	1768665	+	284	ORF19_16	Predicted ORF	-	-	-	-	-	-	-	-	-	-	-	-	-	-	-	-	-	-	-	-	-	-	-	-	-	-	-	-	-	-	-	-
1096	ORF19_19	1773155	1774498	+	447	ORF19_19	Predicted ORF	-	-	-	-	-	-	-	-	-	-	-	-	-	-	-	-	-	-	-	-	-	-	-	-	-	-	-	-	-	-	-	-
1097	ORF19_20	1774757	1776421	+	554	ORF19_20	Predicted ORF	-	-	-	-	-	-	-	-	-	-	-	-	-	-	-	-	-	-	-	-	-	-	-	-	-	-	-	-	-	-	-	-
1098	ORF19_22	1778311	1778691	-	126	ORF19_22	Predicted ORF	-	-	-	-	-	-	-	-	-	-	-	-	-	-	-	-	-	-	-	-	-	-	-	-	-	-	-	-	-	-	-	-
1099	ORF19_23	1778695	1779174	-	159	ORF19_23	Predicted ORF	-	-	-	-	-	-	-	-	-	-	-	-	-	-	-	-	-	-	-	-	-	-	-	-	-	-	-	-	-	-	-	-
1100	ORF19_25	1780641	1782128	-	495	ORF19_25	Predicted ORF	-	-	-	-	-	-	-	-	-	-	-	-	-	-	-	-	-	-	-	-	-	-	-	-	-	-	-	-	-	-	-	-
1101	ORF19_26	1782436	1783656	+	406	ORF19_26	Predicted ORF	-	-	-	-	-	-	-	-	-	-	-	-	-	-	-	-	-	-	-	-	-	-	-	-	-	-	-	-	-	-	-	-
1102	ORF19_28	1785599	1786954	+	451	ORF19_28	Predicted ORF	-	-	-	-	-	-	-	-	-	-	-	-	-	-	-	-	-	-	-	-	-	-	-	-	-	-	-	-	-	-	-	-
1103	ORF19_31	1789864	1791075	+	403	ORF19_31	Predicted ORF	-	-	-	-	-	-	-	-	-	-	-	-	-	-	-	-	-	-	-	-	-	-	-	-	-	-	-	-	-	-	-	-
1104	ORF19_32	1791072	1792454	+	460	ORF19_32	Predicted ORF	-	-	-	-	-	-	-	-	-	-	-	-	-	-	-	-	-	-	-	-	-	-	-	-	-	-	-	-	-	-	-	-
1105	ORF19_33	1792451	1793452	+	333	ORF19_33	Predicted ORF	-	-	-	-	-	-	-	-	-	-	-	-	-	-	-	-	-	-	-	-	-	-	-	-	-	-	-	-	-	-	-	-
1106	ORF19_36	1796094	1796546	+	150	ORF19_36	Predicted ORF	-	-	-	-	-	-	-	-	-	-	-	-	-	-	-	-	-	-	-	-	-	-	-	-	-	-	-	-	-	-	-	-
1107	ORF19_37	1796556	1797953	+	465	ORF19_37	Predicted ORF	-	-	-	-	-	-	-	-	-	-	-	-	-	-	-	-	-	-	-	-	-	-	-	-	-	-	-	-	-	-	-	-
1108	ORF19_39	1799067	1800713	+	548	ORF19_39	Predicted ORF	-	-	-	-	-	-	-	-	-	-	-	-	-	-	-	-	-	-	-	-	-	-	-	-	-	-	-	-	-	-	-	-
1109	ORF19_40	1801111	1801413	+	100	ORF19_40	Predicted ORF	-	-	-	-	-	-	-	-	-	-	-	-	-	-	-	-	-	-	-	-	-	-	-	-	-	-	-	-	-	-	-	-
1110	ORF19_41	1802193	1802312	+	39	ORF19_41	Predicted ORF	-	-	-	-	-	-	-	-	-	-	-	-	-	-	-	-	-	-	-	-	-	-	-	-	-	-	-	-	-	-	-	-
1111	ORF19_42	1802739	1803242	+	167	ORF19_42	Predicted ORF;PAI|PAI_AAK20751 toxR-activated gene D protein	VFG0087	0.455	-	-	-	-	-	-	-	-	-	-	-	-	-	-	-	-	-	-	-	-	-	-	-	-	-	-	PAI_AAK20781	0.455	-	-
1112	ORF19_43	1803766	1804053	+	95	ORF19_43	Predicted ORF	-	-	-	-	-	-	-	-	-	-	-	-	-	-	-	-	-	-	-	-	-	-	-	-	-	-	-	-	-	-	-	-
1113	ORF19_44	1804956	1806806	-	616	ORF19_44	Predicted ORF	-	-	-	-	-	-	-	-	-	-	-	-	-	-	-	-	-	-	-	-	-	-	-	-	-	-	-	-	-	-	-	-
1114	ORF19_45	1806830	1807057	-	75	ORF19_45	Predicted ORF	-	-	-	-	-	-	-	-	-	-	-	-	-	-	-	-	-	-	-	-	-	-	-	-	-	-	-	-	-	-	-	-
1115	ORF19_47	1808337	1808627	-	96	ORF19_47	Predicted ORF	-	-	-	-	-	-	-	-	-	-	-	-	-	-	-	-	-	-	-	-	-	-	-	-	-	-	-	-	-	-	-	-
1116	ORF19_49	1810993	1811235	-	80	ORF19_49	Predicted ORF	-	-	-	-	-	-	-	-	-	-	-	-	-	-	-	-	-	-	-	-	-	-	-	-	-	-	-	-	-	-	-	-
1117	ORF19_50	1811485	1812435	-	316	ORF19_50	Predicted ORF	-	-	-	-	-	-	-	-	-	-	-	-	-	-	-	-	-	-	-	-	-	-	-	-	-	-	-	-	-	-	-	-
1118	ORF19_51	1812614	1813060	-	148	ORF19_51	Predicted ORF	-	-	-	-	-	-	-	-	-	-	-	-	-	-	-	-	-	-	-	-	-	-	-	-	-	-	-	-	-	-	-	-
1119	ORF19_54	1816930	1817952	-	340	ORF19_54	Predicted ORF	-	-	-	-	-	-	-	-	-	-	-	-	-	-	-	-	-	-	-	-	-	-	-	-	-	-	-	-	-	-	-	-
1120	ORF19_58	1820952	1821857	-	301	ORF19_58	Predicted ORF	-	-	-	-	-	-	-	-	-	-	-	-	-	-	-	-	-	-	-	-	-	-	-	-	-	-	-	-	-	-	-	-
1121	ORF19_59	1821877	1822278	-	133	ORF19_59	Predicted ORF	-	-	-	-	-	-	-	-	-	-	-	-	-	-	-	-	-	-	-	-	-	-	-	-	-	-	-	-	-	-	-	-
1122	ORF19_60	1822636	1823718	+	360	ORF19_60	Predicted ORF	-	-	-	-	-	-	-	-	-	-	-	-	-	-	-	-	-	-	-	-	-	-	-	-	-	-	-	-	-	-	-	-
1123	ORF19_62	1827857	1828498	+	213	ORF19_62	Predicted ORF	-	-	-	-	-	-	-	-	-	-	-	-	-	-	-	-	-	-	-	-	-	-	-	-	-	-	-	-	-	-	-	-
1124	ORF19_63	1829303	1831021	+	572	ORF19_63	Predicted ORF	-	-	-	-	-	-	-	-	-	-	-	-	-	-	-	-	-	-	-	-	-	-	-	-	-	-	-	-	-	-	-	-
1125	ORF19_64	1831184	1832104	+	306	ORF19_64	Predicted ORF	-	-	-	-	-	-	-	-	-	-	-	-	-	-	-	-	-	-	-	-	-	-	-	-	-	-	-	-	-	-	-	-
1126	ORF19_65	1832120	1833025	+	301	ORF19_65	Predicted ORF	-	-	-	-	-	-	-	-	-	-	-	-	-	-	-	-	-	-	-	-	-	-	-	-	-	-	-	-	-	-	-	-
1127	ORF19_69	1837294	1838634	-	446	ORF19_69	Predicted ORF	-	-	-	-	-	-	-	-	-	-	-	-	-	-	-	-	-	-	-	-	-	-	-	-	-	-	-	-	-	-	-	-
1128	ORF19_70	1838919	1839620	+	233	ORF19_70	Predicted ORF	-	-	-	-	-	-	-	-	-	-	-	-	-	-	-	-	-	-	-	-	-	-	-	-	-	-	-	-	-	-	-	-
1129	ORF19_71	1839662	1840870	+	402	ORF19_71	Predicted ORF;AR|AR_NP_461165 bicyclomycin/multidrug efflux system	-	-	AR_YP_002850162	0.555	-	-	-	-	-	-	-	-	-	-	-	-	-	-	-	-	-	-	-	-	-	-	-	-	-	-	-	-
1130	ORF19_75	1845586	1846413	+	275	ORF19_75	Predicted ORF	-	-	-	-	-	-	-	-	-	-	-	-	-	-	-	-	-	-	-	-	-	-	-	-	-	-	-	-	-	-	-	-
1131	ORF19_77	1847916	1848449	+	177	ORF19_77	Predicted ORF	-	-	-	-	-	-	-	-	-	-	-	-	-	-	-	-	-	-	-	-	-	-	-	-	-	-	-	-	-	-	-	-
1132	ORF19_79	1849606	1850283	+	225	ORF19_79	Predicted ORF	-	-	-	-	-	-	-	-	-	-	-	-	-	-	-	-	-	-	-	-	-	-	-	-	-	-	-	-	-	-	-	-
1133	ORF19_80	1850320	1850907	+	195	ORF19_80	Predicted ORF	-	-	-	-	-	-	-	-	-	-	-	-	-	-	-	-	-	-	-	-	-	-	-	-	-	-	-	-	-	-	-	-
1134	ORF19_81	1851133	1851699	-	188	ORF19_81	Predicted ORF	-	-	-	-	-	-	-	-	-	-	-	-	-	-	-	-	-	-	-	-	-	-	-	-	-	-	-	-	-	-	-	-
1135	ORF19_83	1852940	1855099	-	719	ORF19_83	Predicted ORF	-	-	-	-	-	-	-	-	-	-	-	-	-	-	-	-	-	-	-	-	-	-	-	-	-	-	-	-	-	-	-	-
1136	ORF19_84	1855120	1855575	-	151	ORF19_84	Predicted ORF	-	-	-	-	-	-	-	-	-	-	-	-	-	-	-	-	-	-	-	-	-	-	-	-	-	-	-	-	-	-	-	-
1137	ORF19_85	1855811	1857988	+	725	ORF19_85	Predicted ORF	-	-	-	-	-	-	-	-	-	-	-	-	-	-	-	-	-	-	-	-	-	-	-	-	-	-	-	-	-	-	-	-
1138	ORF19_86	1858197	1858589	+	130	ORF19_86	Predicted ORF	-	-	-	-	-	-	-	-	-	-	-	-	-	-	-	-	-	-	-	-	-	-	-	-	-	-	-	-	-	-	-	-
1139	ORF19_87	1858652	1859113	-	153	ORF19_87	Predicted ORF	-	-	-	-	-	-	-	-	-	-	-	-	-	-	-	-	-	-	-	-	-	-	-	-	-	-	-	-	-	-	-	-
1140	ORF19_88	1859239	1859928	-	229	ORF19_88	Predicted ORF	-	-	-	-	-	-	-	-	-	-	-	-	-	-	-	-	-	-	-	-	-	-	-	-	-	-	-	-	-	-	-	-
1141	ORF19_89	1860130	1860546	+	138	ORF19_89	Predicted ORF	-	-	-	-	-	-	-	-	-	-	-	-	-	-	-	-	-	-	-	-	-	-	-	-	-	-	-	-	-	-	-	-
1142	ORF19_90	1860655	1860972	-	105	ORF19_90	Predicted ORF	-	-	-	-	-	-	-	-	-	-	-	-	-	-	-	-	-	-	-	-	-	-	-	-	-	-	-	-	-	-	-	-
1143	ORF19_91	1861342	1862532	-	396	ORF19_91	Predicted ORF	-	-	-	-	-	-	-	-	-	-	-	-	-	-	-	-	-	-	-	-	-	-	-	-	-	-	-	-	-	-	-	-
1144	ORF19_92	1862694	1862966	+	90	ORF19_92	Predicted ORF	-	-	-	-	-	-	-	-	-	-	-	-	-	-	-	-	-	-	-	-	-	-	-	-	-	-	-	-	-	-	-	-
1145	ORF19_93	1862963	1863301	-	112	ORF19_93	Predicted ORF	-	-	-	-	-	-	-	-	-	-	-	-	-	-	-	-	-	-	-	-	-	-	-	-	-	-	-	-	-	-	-	-
1146	ORF19_94	1863432	1864088	-	218	ORF19_94	Predicted ORF	-	-	-	-	-	-	-	-	-	-	-	-	-	-	-	-	-	-	-	-	-	-	-	-	-	-	-	-	-	-	-	-
1147	ORF19_97	1867812	1868321	+	169	ORF19_97	Predicted ORF	-	-	-	-	-	-	-	-	-	-	-	-	-	-	-	-	-	-	-	-	-	-	-	-	-	-	-	-	-	-	-	-
1148	ORF19_98	1868314	1868580	+	88	ORF19_98	Predicted ORF	-	-	-	-	-	-	-	-	-	-	-	-	-	-	-	-	-	-	-	-	-	-	-	-	-	-	-	-	-	-	-	-
1149	ORF19_99	1868577	1871063	+	828	ORF19_99	Predicted ORF	-	-	-	-	-	-	-	-	-	-	-	-	-	-	-	-	-	-	-	-	-	-	-	-	-	-	-	-	-	-	-	-
1150	ORF19_100	1871163	1871915	+	250	ORF19_100	Predicted ORF	-	-	-	-	-	-	-	-	-	-	-	-	-	-	-	-	-	-	-	-	-	-	-	-	-	-	-	-	-	-	-	-
1151	ORF19_101	1871915	1872781	+	288	ORF19_101	Predicted ORF	-	-	-	-	-	-	-	-	-	-	-	-	-	-	-	-	-	-	-	-	-	-	-	-	-	-	-	-	-	-	-	-
1152	ORF19_102	1872778	1873236	+	152	ORF19_102	Predicted ORF	-	-	-	-	-	-	-	-	-	-	-	-	-	-	-	-	-	-	-	-	-	-	-	-	-	-	-	-	-	-	-	-
1153	ORF19_103	1873251	1873868	+	205	ORF19_103	Predicted ORF	-	-	-	-	-	-	-	-	-	-	-	-	-	-	-	-	-	-	-	-	-	-	-	-	-	-	-	-	-	-	-	-
1154	ORF19_104	1874543	1875478	-	311	ORF19_104	Predicted ORF	-	-	-	-	-	-	-	-	-	-	-	-	-	-	-	-	-	-	-	-	-	-	-	-	-	-	-	-	-	-	-	-
1155	ORF19_105	1875481	1876455	-	324	ORF19_105	Predicted ORF	-	-	-	-	-	-	-	-	-	-	-	-	-	-	-	-	-	-	-	-	-	-	-	-	-	-	-	-	-	-	-	-
1156	ORF19_106	1876564	1878120	-	518	ORF19_106	Predicted ORF	-	-	-	-	-	-	-	-	-	-	-	-	-	-	-	-	-	-	-	-	-	-	-	-	-	-	-	-	-	-	-	-
1157	ORF19_108	1880554	1880946	+	130	ORF19_108	Predicted ORF	-	-	-	-	-	-	-	-	-	-	-	-	-	-	-	-	-	-	-	-	-	-	-	-	-	-	-	-	-	-	-	-
1158	ORF19_109	1881076	1881735	+	219	ORF19_109	Predicted ORF;VF|VFG1390 (gi:15608121) mprA - hypothetical protein Rv0981	VFG0473	0.425	-	-	-	-	-	-	-	-	-	-	-	-	-	-	-	-	-	-	-	-	-	-	-	-	-	-	-	-	-	-
1159	ORF19_112	1884811	1885398	+	195	ORF19_112	Predicted ORF	-	-	-	-	-	-	-	-	-	-	-	-	-	-	-	-	-	-	-	-	-	-	-	-	-	-	-	-	-	-	-	-
1160	ORF19_113	1885446	1886123	+	225	ORF19_113	Predicted ORF	-	-	-	-	-	-	-	-	-	-	-	-	-	-	-	-	-	-	-	-	-	-	-	-	-	-	-	-	-	-	-	-
1161	ORF19_114	1886232	1887965	-	577	ORF19_114	Predicted ORF	-	-	-	-	-	-	-	-	-	-	-	-	-	-	-	-	-	-	-	-	-	-	-	-	-	-	-	-	-	-	-	-
1162	ORF19_115	1888166	1888771	+	201	ORF19_115	Predicted ORF	-	-	-	-	-	-	-	-	-	-	-	-	-	-	-	-	-	-	-	-	-	-	-	-	-	-	-	-	-	-	-	-
1163	ORF19_116	1888879	1889379	+	166	ORF19_116	Predicted ORF	-	-	-	-	-	-	-	-	-	-	-	-	-	-	-	-	-	-	-	-	-	-	-	-	-	-	-	-	-	-	-	-
1164	ORF19_117	1889871	1890332	+	153	ORF19_117	Predicted ORF	-	-	-	-	-	-	-	-	-	-	-	-	-	-	-	-	-	-	-	-	-	-	-	-	-	-	-	-	-	-	-	-
1165	ORF19_119	1892017	1892775	+	252	ORF19_119	Predicted ORF	-	-	-	-	-	-	-	-	-	-	-	-	-	-	-	-	-	-	-	-	-	-	-	-	-	-	-	-	-	-	-	-
1166	ORF19_122	1894678	1895418	-	246	ORF19_122	Predicted ORF	-	-	-	-	-	-	-	-	-	-	-	-	-	-	-	-	-	-	-	-	-	-	-	-	-	-	-	-	-	-	-	-
1167	ORF19_123	1895572	1895964	-	130	ORF19_123	Predicted ORF	-	-	-	-	-	-	-	-	-	-	-	-	-	-	-	-	-	-	-	-	-	-	-	-	-	-	-	-	-	-	-	-
1168	ORF19_125	1898022	1898537	-	171	ORF19_125	Predicted ORF	-	-	-	-	-	-	-	-	-	-	-	-	-	-	-	-	-	-	-	-	-	-	-	-	-	-	-	-	-	-	-	-
1169	ORF19_126	1898840	1899544	+	234	ORF19_126	Predicted ORF	-	-	-	-	-	-	-	-	-	-	-	-	-	-	-	-	-	-	-	-	-	-	-	-	-	-	-	-	-	-	-	-
1170	ORF19_127	1899823	1901592	+	589	ORF19_127	Predicted ORF;	-	-	-	-	-	-	-	-	-	-	-	-	-	-	-	-	-	-	-	-	-	-	-	-	-	-	-	-	-	-	ARI_484356532	0.582
1171	ORF19_128	1901595	1902035	+	146	ORF19_128	Predicted ORF	-	-	-	-	-	-	-	-	-	-	-	-	-	-	-	-	-	-	-	-	-	-	-	-	-	-	-	-	-	-	-	-
1172	ORF19_129	1902091	1902834	+	247	ORF19_129	Predicted ORF	-	-	-	-	-	-	-	-	-	-	-	-	-	-	-	-	-	-	-	-	-	-	-	-	-	-	-	-	-	-	-	-
1173	ORF19_130	1902838	1903359	+	173	ORF19_130	Predicted ORF	-	-	-	-	-	-	-	-	-	-	-	-	-	-	-	-	-	-	-	-	-	-	-	-	-	-	-	-	-	-	-	-
1174	ORF19_131	1903457	1904080	+	207	ORF19_131	Predicted ORF	-	-	-	-	-	-	-	-	-	-	-	-	-	-	-	-	-	-	-	-	-	-	-	-	-	-	-	-	-	-	-	-
1175	ORF19_133	1906054	1907628	+	524	ORF19_133	Predicted ORF	-	-	-	-	-	-	-	-	-	-	-	-	-	-	-	-	-	-	-	-	-	-	-	-	-	-	-	-	-	-	-	-
1176	ORF19_134	1907644	1908783	+	379	ORF19_134	Predicted ORF	-	-	-	-	-	-	-	-	-	-	-	-	-	-	-	-	-	-	-	-	-	-	-	-	-	-	-	-	-	-	-	-
1177	ORF19_135	1908858	1908962	+	34	ORF19_135	Predicted ORF	-	-	-	-	-	-	-	-	-	-	-	-	-	-	-	-	-	-	-	-	-	-	-	-	-	-	-	-	-	-	-	-
1178	ORF19_136	1908964	1909251	+	95	ORF19_136	Predicted ORF	-	-	-	-	-	-	-	-	-	-	-	-	-	-	-	-	-	-	-	-	-	-	-	-	-	-	-	-	-	-	-	-
1179	ORF19_137	1909364	1909774	+	136	ORF19_137	Predicted ORF	-	-	-	-	-	-	-	-	-	-	-	-	-	-	-	-	-	-	-	-	-	-	-	-	-	-	-	-	-	-	-	-
1180	ORF19_138	1909812	1910453	+	213	ORF19_138	Predicted ORF	-	-	-	-	-	-	-	-	-	-	-	-	-	-	-	-	-	-	-	-	-	-	-	-	-	-	-	-	-	-	-	-
1181	ORF19_139	1910471	1910902	+	143	ORF19_139	Predicted ORF	-	-	-	-	-	-	-	-	-	-	-	-	-	-	-	-	-	-	-	-	-	-	-	-	-	-	-	-	-	-	-	-
1182	ORF19_141	1912118	1913410	+	430	ORF19_141	Predicted ORF	-	-	-	-	-	-	-	-	-	-	-	-	-	-	-	-	-	-	-	-	-	-	-	-	-	-	-	-	-	-	-	-
1183	ORF19_143	1913957	1914757	+	266	ORF19_143	Predicted ORF	-	-	-	-	-	-	-	-	-	-	-	-	-	-	-	-	-	-	-	-	-	-	-	-	-	-	-	-	-	-	-	-
1184	ORF19_144	1915070	1916449	+	459	ORF19_144	Predicted ORF	-	-	-	-	-	-	-	-	-	-	-	-	-	-	-	-	-	-	-	-	-	-	-	-	-	-	-	-	-	-	-	-
1185	ORF19_145	1916678	1917430	+	250	ORF19_145	Predicted ORF	-	-	-	-	-	-	-	-	-	-	-	-	-	-	-	-	-	-	-	-	-	-	-	-	-	-	-	-	-	-	-	-
1186	ORF19_147	1918834	1918998	-	54	ORF19_147	Predicted ORF	-	-	-	-	-	-	-	-	-	-	-	-	-	-	-	-	-	-	-	-	-	-	-	-	-	-	-	-	-	-	-	-
1187	ORF19_148	1919220	1920689	-	489	ORF19_148	Predicted ORF	-	-	-	-	-	-	-	-	-	-	-	-	-	-	-	-	-	-	-	-	-	-	-	-	-	-	-	-	-	-	-	-
1188	ORF19_149	1920845	1921570	+	241	ORF19_149	Predicted ORF	-	-	-	-	-	-	-	-	-	-	-	-	-	-	-	-	-	-	-	-	-	-	-	-	-	-	-	-	-	-	-	-
1189	ORF19_150	1921659	1921868	+	69	ORF19_150	Predicted ORF	-	-	-	-	-	-	-	-	-	-	-	-	-	-	-	-	-	-	-	-	-	-	-	-	-	-	-	-	-	-	-	-
1190	ORF19_152	1922416	1922715	-	99	ORF19_152	Predicted ORF	-	-	-	-	-	-	-	-	-	-	-	-	-	-	-	-	-	-	-	-	-	-	-	-	-	-	-	-	-	-	-	-
1191	ORF19_153	1923061	1923396	-	111	ORF19_153	Predicted ORF	-	-	-	-	-	-	-	-	-	-	-	-	-	-	-	-	-	-	-	-	-	-	-	-	-	-	-	-	-	-	-	-
1192	ORF19_155	1926373	1927401	-	342	ORF19_155	Predicted ORF	-	-	-	-	-	-	-	-	-	-	-	-	-	-	-	-	-	-	-	-	-	-	-	-	-	-	-	-	-	-	-	-
1193	ORF19_156	1927401	1928483	-	360	ORF19_156	Predicted ORF	-	-	-	-	-	-	-	-	-	-	-	-	-	-	-	-	-	-	-	-	-	-	-	-	-	-	-	-	-	-	-	-
1194	ORF19_157	1928504	1930321	-	605	ORF19_157	Predicted ORF	-	-	-	-	-	-	-	-	-	-	-	-	-	-	-	-	-	-	-	-	-	-	-	-	-	-	-	-	-	-	-	-
1195	ORF19_161	1934220	1934432	+	70	ORF19_161	Predicted ORF	-	-	-	-	-	-	-	-	-	-	-	-	-	-	-	-	-	-	-	-	-	-	-	-	-	-	-	-	-	-	-	-
1196	ORF19_162	1934604	1935341	+	245	ORF19_162	Predicted ORF	-	-	-	-	-	-	-	-	-	-	-	-	-	-	-	-	-	-	-	-	-	-	-	-	-	-	-	-	-	-	-	-
1197	ORF19_163	1935464	1937206	-	580	ORF19_163	Predicted ORF	-	-	-	-	-	-	-	-	-	-	-	-	-	-	-	-	-	-	-	-	-	-	-	-	-	-	-	-	-	-	-	-
1198	ORF19_164	1937259	1937789	-	176	ORF19_164	Predicted ORF	-	-	-	-	-	-	-	-	-	-	-	-	-	-	-	-	-	-	-	-	-	-	-	-	-	-	-	-	-	-	-	-
1199	ORF19_165	1937948	1939123	-	391	ORF19_165	Predicted ORF	-	-	-	-	-	-	-	-	-	-	-	-	-	-	-	-	-	-	-	-	-	-	-	-	-	-	-	-	-	-	-	-
1200	ORF19_168	1943710	1944453	+	247	ORF19_168	Predicted ORF	-	-	-	-	-	-	-	-	-	-	-	-	-	-	-	-	-	-	-	-	-	-	-	-	-	-	-	-	-	-	-	-
1201	ORF19_169	1944605	1945441	-	278	ORF19_169	Predicted ORF	-	-	-	-	-	-	-	-	-	-	-	-	-	-	-	-	-	-	-	-	-	-	-	-	-	-	-	-	-	-	-	-
1202	ORF19_170	1945850	1946641	-	263	ORF19_170	Predicted ORF	-	-	-	-	-	-	-	-	-	-	-	-	-	-	-	-	-	-	-	-	-	-	-	-	-	-	-	-	-	-	-	-
1203	ORF19_173	1948696	1949571	-	291	ORF19_173	Predicted ORF	-	-	-	-	-	-	-	-	-	-	-	-	-	-	-	-	-	-	-	-	-	-	-	-	-	-	-	-	-	-	-	-
1204	ORF19_174	1949573	1950532	-	319	ORF19_174	Predicted ORF	-	-	-	-	-	-	-	-	-	-	-	-	-	-	-	-	-	-	-	-	-	-	-	-	-	-	-	-	-	-	-	-
1205	ORF19_175	1950529	1952223	-	564	ORF19_175	Predicted ORF	-	-	-	-	-	-	-	-	-	-	-	-	-	-	-	-	-	-	-	-	-	-	-	-	-	-	-	-	-	-	-	-
1206	ORF19_177	1953829	1954494	+	221	ORF19_177	Predicted ORF	-	-	-	-	-	-	-	-	-	-	-	-	-	-	-	-	-	-	-	-	-	-	-	-	-	-	-	-	-	-	-	-
1207	ORF19_178	1954619	1954849	+	76	ORF19_178	Predicted ORF	-	-	-	-	-	-	-	-	-	-	-	-	-	-	-	-	-	-	-	-	-	-	-	-	-	-	-	-	-	-	-	-
1208	ORF19_179	1954846	1955229	+	127	ORF19_179	Predicted ORF	-	-	-	-	-	-	-	-	-	-	-	-	-	-	-	-	-	-	-	-	-	-	-	-	-	-	-	-	-	-	-	-
1209	ORF19_180	1955272	1956684	+	470	ORF19_180	Predicted ORF	-	-	-	-	-	-	-	-	-	-	-	-	-	-	-	-	-	-	-	-	-	-	-	-	-	-	-	-	-	-	-	-
1210	ORF19_181	1956681	1957784	+	367	ORF19_181	Predicted ORF	-	-	-	-	-	-	-	-	-	-	-	-	-	-	-	-	-	-	-	-	-	-	-	-	-	-	-	-	-	-	-	-
1211	ORF19_182	1958025	1958510	+	161	ORF19_182	Predicted ORF	-	-	-	-	-	-	-	-	-	-	-	-	-	-	-	-	-	-	-	-	-	-	-	-	-	-	-	-	-	-	-	-
1212	ORF19_185	1961993	1962376	-	127	ORF19_185	Predicted ORF	-	-	-	-	-	-	-	-	-	-	-	-	-	-	-	-	-	-	-	-	-	-	-	-	-	-	-	-	-	-	-	-
1213	ORF19_186	1962745	1963158	+	137	ORF19_186	Predicted ORF	-	-	-	-	-	-	-	-	-	-	-	-	-	-	-	-	-	-	-	-	-	-	-	-	-	-	-	-	-	-	-	-
1214	ORF19_187	1963208	1965214	+	668	ORF19_187	Predicted ORF	-	-	-	-	-	-	-	-	-	-	-	-	-	-	-	-	-	-	-	-	-	-	-	-	-	-	-	-	-	-	-	-
1215	ORF19_190	1968407	1970698	-	763	ORF19_190	Predicted ORF	-	-	-	-	-	-	-	-	-	-	-	-	-	-	-	-	-	-	-	-	-	-	-	-	-	-	-	-	-	-	-	-
1216	ORF19_191	1971036	1971926	-	296	ORF19_191	Predicted ORF	-	-	-	-	-	-	-	-	-	-	-	-	-	-	-	-	-	-	-	-	-	-	-	-	-	-	-	-	-	-	-	-
1217	ORF19_193	1972768	1973634	-	288	ORF19_193	Predicted ORF	-	-	-	-	-	-	-	-	-	-	-	-	-	-	-	-	-	-	-	-	-	-	-	-	-	-	-	-	-	-	-	-
1218	ORF19_194	1973631	1974518	-	295	ORF19_194	Predicted ORF	-	-	-	-	-	-	-	-	-	-	-	-	-	-	-	-	-	-	-	-	-	-	-	-	-	-	-	-	-	-	-	-
1219	ORF19_195	1974511	1975416	-	301	ORF19_195	Predicted ORF	-	-	-	-	-	-	-	-	-	-	-	-	-	-	-	-	-	-	-	-	-	-	-	-	-	-	-	-	-	-	-	-
1220	ORF19_197	1976215	1977969	-	584	ORF19_197	Predicted ORF	-	-	-	-	-	-	-	-	-	-	-	-	-	-	-	-	-	-	-	-	-	-	-	-	-	-	-	-	-	-	-	-
1221	ORF19_199	1979835	1981862	+	675	ORF19_199	Predicted ORF	-	-	-	-	-	-	-	-	-	-	-	-	-	-	-	-	-	-	-	-	-	-	-	-	-	-	-	-	-	-	-	-
1222	ORF19_200	1981987	1982418	+	143	ORF19_200	Predicted ORF	-	-	-	-	-	-	-	-	-	-	-	-	-	-	-	-	-	-	-	-	-	-	-	-	-	-	-	-	-	-	-	-
1223	ORF19_202	1984442	1984879	+	145	ORF19_202	Predicted ORF	-	-	-	-	-	-	-	-	-	-	-	-	-	-	-	-	-	-	-	-	-	-	-	-	-	-	-	-	-	-	-	-
1224	ORF19_203	1985131	1985775	+	214	ORF19_203	Predicted ORF;VF|VFG2044 (gi:33592926) bvgA - virulence factors transcription regulator	VFG1889	0.495	-	-	-	-	-	-	-	-	-	-	-	-	-	-	-	-	-	-	-	-	-	-	-	-	-	-	-	-	-	-
1225	ORF19_204	1985780	1987621	+	613	ORF19_204	Predicted ORF	-	-	-	-	-	-	-	-	-	-	-	-	-	-	-	-	-	-	-	-	-	-	-	-	-	-	-	-	-	-	-	-
1226	ORF19_205	1987659	1988225	+	188	ORF19_205	Predicted ORF	-	-	-	-	-	-	-	-	-	-	-	-	-	-	-	-	-	-	-	-	-	-	-	-	-	-	-	-	-	-	-	-
1227	ORF19_206	1989024	1990034	-	336	ORF19_206	Predicted ORF;Prophage|Prophage_38707923 NC_005284 putative site-specific integrase similar to NP_536390 and NP_888206 {Burkholderia phage phi1026b}	-	-	-	-	-	-	-	-	-	-	-	-	Prophage_23505472	0.458	-	-	-	-	-	-	-	-	-	-	-	-	-	-	-	-	-	-
1228	ORF19_210	1993002	1993256	-	84	ORF19_210	Predicted ORF	-	-	-	-	-	-	-	-	-	-	-	-	-	-	-	-	-	-	-	-	-	-	-	-	-	-	-	-	-	-	-	-
1229	ORF19_211	1993274	1993486	-	70	ORF19_211	Predicted ORF	-	-	-	-	-	-	-	-	-	-	-	-	-	-	-	-	-	-	-	-	-	-	-	-	-	-	-	-	-	-	-	-
1230	ORF19_212	1994052	1994225	-	57	ORF19_212	Predicted ORF	-	-	-	-	-	-	-	-	-	-	-	-	-	-	-	-	-	-	-	-	-	-	-	-	-	-	-	-	-	-	-	-
1231	ORF19_213	1994227	1995129	-	300	ORF19_213	Predicted ORF	-	-	-	-	-	-	-	-	-	-	-	-	-	-	-	-	-	-	-	-	-	-	-	-	-	-	-	-	-	-	-	-
1232	ORF19_216	1996196	1996525	+	109	ORF19_216	Predicted ORF	-	-	-	-	-	-	-	-	-	-	-	-	-	-	-	-	-	-	-	-	-	-	-	-	-	-	-	-	-	-	-	-
1233	ORF19_217	1996537	1996746	+	69	ORF19_217	Predicted ORF	-	-	-	-	-	-	-	-	-	-	-	-	-	-	-	-	-	-	-	-	-	-	-	-	-	-	-	-	-	-	-	-
1234	ORF19_221	1998676	1999002	+	108	ORF19_221	Predicted ORF	-	-	-	-	-	-	-	-	-	-	-	-	-	-	-	-	-	-	-	-	-	-	-	-	-	-	-	-	-	-	-	-
1235	ORF19_222	1999215	1999577	+	120	ORF19_222	Predicted ORF	-	-	-	-	-	-	-	-	-	-	-	-	-	-	-	-	-	-	-	-	-	-	-	-	-	-	-	-	-	-	-	-
1236	ORF19_224	2002239	2004467	+	742	ORF19_224	Predicted ORF	-	-	-	-	-	-	-	-	-	-	-	-	-	-	-	-	-	-	-	-	-	-	-	-	-	-	-	-	-	-	-	-
1237	ORF19_226	2005653	2006363	+	236	ORF19_226	Predicted ORF	-	-	-	-	-	-	-	-	-	-	-	-	-	-	-	-	-	-	-	-	-	-	-	-	-	-	-	-	-	-	-	-
1238	ORF19_227	2006378	2008843	+	821	ORF19_227	Predicted ORF	-	-	-	-	-	-	-	-	-	-	-	-	-	-	-	-	-	-	-	-	-	-	-	-	-	-	-	-	-	-	-	-
1239	ORF19_228	2008843	2009367	+	174	ORF19_228	Predicted ORF	-	-	-	-	-	-	-	-	-	-	-	-	-	-	-	-	-	-	-	-	-	-	-	-	-	-	-	-	-	-	-	-
1240	ORF19_229	2009392	2010498	+	368	ORF19_229	Predicted ORF	-	-	-	-	-	-	-	-	-	-	-	-	-	-	-	-	-	-	-	-	-	-	-	-	-	-	-	-	-	-	-	-
1241	ORF19_230	2010538	2011227	+	229	ORF19_230	Predicted ORF	-	-	-	-	-	-	-	-	-	-	-	-	-	-	-	-	-	-	-	-	-	-	-	-	-	-	-	-	-	-	-	-
1242	ORF19_231	2011350	2012318	+	322	ORF19_231	Predicted ORF	-	-	-	-	-	-	-	-	-	-	-	-	-	-	-	-	-	-	-	-	-	-	-	-	-	-	-	-	-	-	-	-
1243	ORF19_232	2012392	2013168	+	258	ORF19_232	Predicted ORF	-	-	-	-	-	-	-	-	-	-	-	-	-	-	-	-	-	-	-	-	-	-	-	-	-	-	-	-	-	-	-	-
1244	ORF19_233	2013361	2014152	+	263	ORF19_233	Predicted ORF	-	-	-	-	-	-	-	-	-	-	-	-	-	-	-	-	-	-	-	-	-	-	-	-	-	-	-	-	-	-	-	-
1245	ORF19_235	2015357	2015845	+	162	ORF19_235	Predicted ORF;Prophage|Prophage_30065713 NC_004745 K gpK {Yersinia phage L-413C}	-	-	-	-	-	-	-	-	-	-	-	-	Prophage_33438906	0.509	-	-	-	-	-	-	-	-	-	-	-	-	-	-	-	-	-	-
1246	ORF19_237	2016757	2018460	+	567	ORF19_237	Predicted ORF;Prophage|Prophage_32171001 NC_004913 hypothetical protein {Stx1 converting phage}	-	-	-	-	-	-	-	-	-	-	-	-	Prophage_116222005	0.633	-	-	-	-	-	-	-	-	-	-	-	-	-	-	-	-	-	-
1247	ORF19_238	2018460	2020589	+	709	ORF19_238	Predicted ORF;Prophage|Prophage_20065798 NC_003525 hypothetical protein {Stx2 converting phage I}	-	-	-	-	-	-	-	-	-	-	-	-	Prophage_32171003	0.573	-	-	-	-	-	-	-	-	-	-	-	-	-	-	-	-	-	-
1248	ORF19_240	2021890	2023107	+	405	ORF19_240	Predicted ORF;Prophage|Prophage_9632520 NC_000924 hypothetical protein {Enterobacteria phage 933W}	-	-	-	-	-	-	-	-	-	-	-	-	Prophage_116222008	0.617	-	-	-	-	-	-	-	-	-	-	-	-	-	-	-	-	-	-
1249	ORF19_242	2023645	2024073	+	142	ORF19_242	Predicted ORF;Prophage|Prophage_20065810 NC_003525 hypothetical protein {Stx2 converting phage I}	-	-	-	-	-	-	-	-	-	-	-	-	Prophage_32171015	0.424	-	-	-	-	-	-	-	-	-	-	-	-	-	-	-	-	-	-
1250	ORF19_245	2025372	2026427	+	351	ORF19_245	Predicted ORF	-	-	-	-	-	-	-	-	-	-	-	-	-	-	-	-	-	-	-	-	-	-	-	-	-	-	-	-	-	-	-	-
1251	ORF20_1	2026707	2027282	-	191	ORF20_1	Predicted ORF	-	-	-	-	-	-	-	-	-	-	-	-	-	-	-	-	-	-	-	-	-	-	-	-	-	-	-	-	-	-	-	-
1252	ORF20_2	2027754	2029625	+	623	ORF20_2	Predicted ORF	-	-	-	-	-	-	-	-	-	-	-	-	-	-	-	-	-	-	-	-	-	-	-	-	-	-	-	-	-	-	-	-
1253	ORF20_3	2029895	2030290	-	131	ORF20_3	Predicted ORF	-	-	-	-	-	-	-	-	-	-	-	-	-	-	-	-	-	-	-	-	-	-	-	-	-	-	-	-	-	-	-	-
1254	ORF20_4	2030384	2030968	+	194	ORF20_4	Predicted ORF	-	-	-	-	-	-	-	-	-	-	-	-	-	-	-	-	-	-	-	-	-	-	-	-	-	-	-	-	-	-	-	-
1255	ORF20_5	2031164	2031277	+	37	ORF20_5	Predicted ORF	-	-	-	-	-	-	-	-	-	-	-	-	-	-	-	-	-	-	-	-	-	-	-	-	-	-	-	-	-	-	-	-
1256	ORF20_6	2031402	2031848	-	148	ORF20_6	Predicted ORF	-	-	-	-	-	-	-	-	-	-	-	-	-	-	-	-	-	-	-	-	-	-	-	-	-	-	-	-	-	-	-	-
1257	ORF20_7	2032875	2033453	+	192	ORF20_7	Predicted ORF	-	-	-	-	-	-	-	-	-	-	-	-	-	-	-	-	-	-	-	-	-	-	-	-	-	-	-	-	-	-	-	-
1258	ORF20_8	2033596	2034348	+	250	ORF20_8	Predicted ORF	-	-	-	-	-	-	-	-	-	-	-	-	-	-	-	-	-	-	-	-	-	-	-	-	-	-	-	-	-	-	-	-
1259	ORF20_9	2035985	2036215	+	76	ORF20_9	Predicted ORF	-	-	-	-	-	-	-	-	-	-	-	-	-	-	-	-	-	-	-	-	-	-	-	-	-	-	-	-	-	-	-	-
1260	ORF20_10	2036683	2037198	-	171	ORF20_10	Predicted ORF	-	-	-	-	-	-	-	-	-	-	-	-	-	-	-	-	-	-	-	-	-	-	-	-	-	-	-	-	-	-	-	-
1261	ORF20_12	2038370	2038600	+	76	ORF20_12	Predicted ORF	-	-	-	-	-	-	-	-	-	-	-	-	-	-	-	-	-	-	-	-	-	-	-	-	-	-	-	-	-	-	-	-
1262	ORF20_13	2038987	2039148	+	53	ORF20_13	Predicted ORF	-	-	-	-	-	-	-	-	-	-	-	-	-	-	-	-	-	-	-	-	-	-	-	-	-	-	-	-	-	-	-	-
1263	ORF20_14	2039205	2039618	-	137	ORF20_14	Predicted ORF	-	-	-	-	-	-	-	-	-	-	-	-	-	-	-	-	-	-	-	-	-	-	-	-	-	-	-	-	-	-	-	-
1264	ORF20_15	2040947	2041183	+	78	ORF20_15	Predicted ORF	-	-	-	-	-	-	-	-	-	-	-	-	-	-	-	-	-	-	-	-	-	-	-	-	-	-	-	-	-	-	-	-
1265	ORF20_16	2041565	2042209	-	214	ORF20_16	Predicted ORF	-	-	-	-	-	-	-	-	-	-	-	-	-	-	-	-	-	-	-	-	-	-	-	-	-	-	-	-	-	-	-	-
1266	ORF20_17	2042605	2043015	+	136	ORF20_17	Predicted ORF;PAI|PAI_AAO18063 Orf38	-	-	-	-	-	-	-	-	-	-	-	-	-	-	-	-	-	-	-	-	-	-	-	-	-	-	-	-	PAI_AAO18063	0.596	-	-
1267	ORF20_18	2043280	2043768	-	162	ORF20_18	Predicted ORF	-	-	-	-	-	-	-	-	-	-	-	-	-	-	-	-	-	-	-	-	-	-	-	-	-	-	-	-	-	-	-	-
1268	ORF20_19	2044076	2044597	+	173	ORF20_19	Predicted ORF	-	-	-	-	-	-	-	-	-	-	-	-	-	-	-	-	-	-	-	-	-	-	-	-	-	-	-	-	-	-	-	-
1269	ORF20_20	2044805	2045137	-	110	ORF20_20	Predicted ORF	-	-	-	-	-	-	-	-	-	-	-	-	-	-	-	-	-	-	-	-	-	-	-	-	-	-	-	-	-	-	-	-
1270	ORF21_1	2045139	2046110	+	323	ORF21_1	Predicted ORF	-	-	-	-	-	-	-	-	-	-	-	-	-	-	-	-	-	-	-	-	-	-	-	-	-	-	-	-	-	-	-	-
1271	ORF21_3	2048189	2049136	+	315	ORF21_3	Predicted ORF	-	-	-	-	-	-	-	-	-	-	-	-	-	-	-	-	-	-	-	-	-	-	-	-	-	-	-	-	-	-	-	-
1272	ORF21_4	2049605	2049940	+	111	ORF21_4	Predicted ORF	-	-	-	-	-	-	-	-	-	-	-	-	-	-	-	-	-	-	-	-	-	-	-	-	-	-	-	-	-	-	-	-
1273	ORF21_5	2050865	2051089	+	74	ORF21_5	Predicted ORF	-	-	-	-	-	-	-	-	-	-	-	-	-	-	-	-	-	-	-	-	-	-	-	-	-	-	-	-	-	-	-	-
1274	ORF21_8	2055499	2056686	+	395	ORF21_8	Predicted ORF	-	-	-	-	-	-	-	-	-	-	-	-	-	-	-	-	-	-	-	-	-	-	-	-	-	-	-	-	-	-	-	-
1275	ORF21_9	2056692	2058563	+	623	ORF21_9	Predicted ORF	-	-	-	-	-	-	-	-	-	-	-	-	-	-	-	-	-	-	-	-	-	-	-	-	-	-	-	-	-	-	-	-
1276	ORF21_11	2059311	2059970	+	219	ORF21_11	Predicted ORF	-	-	-	-	-	-	-	-	-	-	-	-	-	-	-	-	-	-	-	-	-	-	-	-	-	-	-	-	-	-	-	-
1277	ORF21_12	2060104	2061447	-	447	ORF21_12	Predicted ORF	-	-	-	-	-	-	-	-	-	-	-	-	-	-	-	-	-	-	-	-	-	-	-	-	-	-	-	-	-	-	-	-
1278	ORF21_13	2061816	2062292	-	158	ORF21_13	Predicted ORF;	-	-	-	-	-	-	-	-	-	-	-	-	-	-	-	-	-	-	-	-	-	-	-	-	-	-	-	-	-	-	ARI_484359517	0.506
1279	ORF21_14	2062332	2063231	-	299	ORF21_14	Predicted ORF	-	-	-	-	-	-	-	-	-	-	-	-	-	-	-	-	-	-	-	-	-	-	-	-	-	-	-	-	-	-	-	-
1280	ORF21_16	2066985	2067296	+	103	ORF21_16	Predicted ORF	-	-	-	-	-	-	-	-	-	-	-	-	-	-	-	-	-	-	-	-	-	-	-	-	-	-	-	-	-	-	-	-
1281	ORF21_17	2067265	2067807	+	180	ORF21_17	Predicted ORF	-	-	-	-	-	-	-	-	-	-	-	-	-	-	-	-	-	-	-	-	-	-	-	-	-	-	-	-	-	-	-	-
1282	ORF21_18	2067820	2068056	+	78	ORF21_18	Predicted ORF	-	-	-	-	-	-	-	-	-	-	-	-	-	-	-	-	-	-	-	-	-	-	-	-	-	-	-	-	-	-	-	-
1283	ORF21_19	2068173	2068526	+	117	ORF21_19	Predicted ORF	-	-	-	-	-	-	-	-	-	-	-	-	-	-	-	-	-	-	-	-	-	-	-	-	-	-	-	-	-	-	-	-
1284	ORF21_23	2076897	2078012	+	371	ORF21_23	Predicted ORF	-	-	-	-	-	-	-	-	-	-	-	-	-	-	-	-	-	-	-	-	-	-	-	-	-	-	-	-	-	-	-	-
1285	ORF21_24	2078071	2080608	+	845	ORF21_24	Predicted ORF	-	-	-	-	-	-	-	-	-	-	-	-	-	-	-	-	-	-	-	-	-	-	-	-	-	-	-	-	-	-	-	-
1286	ORF21_25	2080822	2081412	-	196	ORF21_25	Predicted ORF	-	-	-	-	-	-	-	-	-	-	-	-	-	-	-	-	-	-	-	-	-	-	-	-	-	-	-	-	-	-	-	-
1287	ORF21_26	2081662	2083326	-	554	ORF21_26	Predicted ORF	-	-	-	-	-	-	-	-	-	-	-	-	-	-	-	-	-	-	-	-	-	-	-	-	-	-	-	-	-	-	-	-
1288	ORF21_27	2083776	2084279	+	167	ORF21_27	Predicted ORF	-	-	-	-	-	-	-	-	-	-	-	-	-	-	-	-	-	-	-	-	-	-	-	-	-	-	-	-	-	-	-	-
1289	ORF21_28	2084498	2085865	-	455	ORF21_28	Predicted ORF	-	-	-	-	-	-	-	-	-	-	-	-	-	-	-	-	-	-	-	-	-	-	-	-	-	-	-	-	-	-	-	-
1290	ORF21_29	2086342	2088945	-	867	ORF21_29	Predicted ORF	-	-	-	-	-	-	-	-	-	-	-	-	-	-	-	-	-	-	-	-	-	-	-	-	-	-	-	-	-	-	-	-
1291	ORF21_30	2089066	2090016	-	316	ORF21_30	Predicted ORF	-	-	-	-	-	-	-	-	-	-	-	-	-	-	-	-	-	-	-	-	-	-	-	-	-	-	-	-	-	-	-	-
1292	ORF21_33	2092571	2092987	-	138	ORF21_33	Predicted ORF	-	-	-	-	-	-	-	-	-	-	-	-	-	-	-	-	-	-	-	-	-	-	-	-	-	-	-	-	-	-	-	-
1293	ORF21_34	2093686	2094006	-	106	ORF21_34	Predicted ORF	-	-	-	-	-	-	-	-	-	-	-	-	-	-	-	-	-	-	-	-	-	-	-	-	-	-	-	-	-	-	-	-
1294	ORF21_35	2094272	2095369	+	365	ORF21_35	Predicted ORF	-	-	-	-	-	-	-	-	-	-	-	-	-	-	-	-	-	-	-	-	-	-	-	-	-	-	-	-	-	-	-	-
1295	ORF22_1	2096835	2097218	+	127	ORF22_1	Predicted ORF	-	-	-	-	-	-	-	-	-	-	-	-	-	-	-	-	-	-	-	-	-	-	-	-	-	-	-	-	-	-	-	-
1296	ORF22_2	2097220	2097765	+	181	ORF22_2	Predicted ORF	-	-	-	-	-	-	-	-	-	-	-	-	-	-	-	-	-	-	-	-	-	-	-	-	-	-	-	-	-	-	-	-
1297	ORF22_3	2097881	2098309	+	142	ORF22_3	Predicted ORF	-	-	-	-	-	-	-	-	-	-	-	-	-	-	-	-	-	-	-	-	-	-	-	-	-	-	-	-	-	-	-	-
1298	ORF22_4	2098314	2099015	+	233	ORF22_4	Predicted ORF	-	-	-	-	-	-	-	-	-	-	-	-	-	-	-	-	-	-	-	-	-	-	-	-	-	-	-	-	-	-	-	-
1299	ORF22_5	2099277	2099774	+	165	ORF22_5	Predicted ORF	-	-	-	-	-	-	-	-	-	-	-	-	-	-	-	-	-	-	-	-	-	-	-	-	-	-	-	-	-	-	-	-
1300	ORF22_6	2099838	2100203	+	121	ORF22_6	Predicted ORF	-	-	-	-	-	-	-	-	-	-	-	-	-	-	-	-	-	-	-	-	-	-	-	-	-	-	-	-	-	-	-	-
1301	ORF22_7	2100493	2104554	+	1353	ORF22_7	Predicted ORF	-	-	-	-	-	-	-	-	-	-	-	-	-	-	-	-	-	-	-	-	-	-	-	-	-	-	-	-	-	-	-	-
1302	ORF22_8	2104652	2108875	+	1407	ORF22_8	Predicted ORF	-	-	-	-	-	-	-	-	-	-	-	-	-	-	-	-	-	-	-	-	-	-	-	-	-	-	-	-	-	-	-	-
1303	ORF22_10	2109892	2110701	+	269	ORF22_10	Predicted ORF	-	-	-	-	-	-	-	-	-	-	-	-	-	-	-	-	-	-	-	-	-	-	-	-	-	-	-	-	-	-	-	-
1304	ORF22_11	2110789	2111856	+	355	ORF22_11	Predicted ORF	-	-	-	-	-	-	-	-	-	-	-	-	-	-	-	-	-	-	-	-	-	-	-	-	-	-	-	-	-	-	-	-
1305	ORF22_12	2111940	2112728	+	262	ORF22_12	Predicted ORF	-	-	-	-	-	-	-	-	-	-	-	-	-	-	-	-	-	-	-	-	-	-	-	-	-	-	-	-	-	-	-	-
1306	ORF22_13	2112851	2113456	+	201	ORF22_13	Predicted ORF	-	-	-	-	-	-	-	-	-	-	-	-	-	-	-	-	-	-	-	-	-	-	-	-	-	-	-	-	-	-	-	-
1307	ORF22_14	2113670	2113942	+	90	ORF22_14	Predicted ORF;Prophage|Prophage_48696914 NC_005882 HU DNA binding protein {Burkholderia phage BcepMu}	-	-	-	-	-	-	-	-	-	-	-	-	Prophage_156564019	0.567	-	-	-	-	-	-	-	-	-	-	-	-	-	-	-	-	-	-
1308	ORF22_15	2114171	2116042	-	623	ORF22_15	Predicted ORF	-	-	-	-	-	-	-	-	-	-	-	-	-	-	-	-	-	-	-	-	-	-	-	-	-	-	-	-	-	-	-	-
1309	ORF22_16	2116107	2116460	-	117	ORF22_16	Predicted ORF	-	-	-	-	-	-	-	-	-	-	-	-	-	-	-	-	-	-	-	-	-	-	-	-	-	-	-	-	-	-	-	-
1310	ORF22_17	2116822	2118135	-	437	ORF22_17	Predicted ORF	-	-	-	-	-	-	-	-	-	-	-	-	-	-	-	-	-	-	-	-	-	-	-	-	-	-	-	-	-	-	-	-
1311	ORF22_19	2120172	2120792	-	206	ORF22_19	Predicted ORF	-	-	-	-	-	-	-	-	-	-	-	-	-	-	-	-	-	-	-	-	-	-	-	-	-	-	-	-	-	-	-	-
1312	ORF22_23	2124011	2125309	-	432	ORF22_23	Predicted ORF;VF|VFG1025 (gi:15808705) orf9 - putative anaerobic decarboxylate transporter	VFG1025	0.492	-	-	-	-	-	-	-	-	-	-	-	-	-	-	-	-	-	-	-	-	-	-	-	-	-	-	PAI_AAL08434	0.492	ARI_15808705	0.492
1313	ORF22_24	2125424	2126857	-	477	ORF22_24	Predicted ORF	-	-	-	-	-	-	-	-	-	-	-	-	-	-	-	-	-	-	-	-	-	-	-	-	-	-	-	-	-	-	-	-
1314	ORF22_25	2127160	2127678	+	172	ORF22_25	Predicted ORF	-	-	-	-	-	-	-	-	-	-	-	-	-	-	-	-	-	-	-	-	-	-	-	-	-	-	-	-	-	-	-	-
1315	ORF22_28	2130288	2130620	-	110	ORF22_28	Predicted ORF	-	-	-	-	-	-	-	-	-	-	-	-	-	-	-	-	-	-	-	-	-	-	-	-	-	-	-	-	-	-	-	-
1316	ORF22_29	2131069	2131200	+	43	ORF22_29	Predicted ORF	-	-	-	-	-	-	-	-	-	-	-	-	-	-	-	-	-	-	-	-	-	-	-	-	-	-	-	-	-	-	-	-
1317	ORF22_30	2131242	2131595	+	117	ORF22_30	Predicted ORF	-	-	-	-	-	-	-	-	-	-	-	-	-	-	-	-	-	-	-	-	-	-	-	-	-	-	-	-	-	-	-	-
1318	ORF22_31	2131710	2131994	+	94	ORF22_31	Predicted ORF	-	-	-	-	-	-	-	-	-	-	-	-	-	-	-	-	-	-	-	-	-	-	-	-	-	-	-	-	-	-	-	-
1319	ORF22_32	2132205	2133278	-	357	ORF22_32	Predicted ORF	-	-	-	-	-	-	-	-	-	-	-	-	-	-	-	-	-	-	-	-	-	-	-	-	-	-	-	-	-	-	-	-
1320	ORF23_1	2135394	2136158	-	254	ORF23_1	Predicted ORF	-	-	-	-	-	-	-	-	-	-	-	-	-	-	-	-	-	-	-	-	-	-	-	-	-	-	-	-	-	-	-	-
1321	ORF23_2	2136507	2138252	+	581	ORF23_2	Predicted ORF	-	-	-	-	-	-	-	-	-	-	-	-	-	-	-	-	-	-	-	-	-	-	-	-	-	-	-	-	-	-	-	-
1322	ORF23_3	2138619	2139434	-	271	ORF23_3	Predicted ORF	-	-	-	-	-	-	-	-	-	-	-	-	-	-	-	-	-	-	-	-	-	-	-	-	-	-	-	-	-	-	-	-
1323	ORF23_4	2140044	2140280	+	78	ORF23_4	Predicted ORF	-	-	-	-	-	-	-	-	-	-	-	-	-	-	-	-	-	-	-	-	-	-	-	-	-	-	-	-	-	-	-	-
1324	ORF23_5	2140663	2141124	-	153	ORF23_5	Predicted ORF	-	-	-	-	-	-	-	-	-	-	-	-	-	-	-	-	-	-	-	-	-	-	-	-	-	-	-	-	-	-	-	-
1325	ORF23_6	2141429	2141722	-	97	ORF23_6	Predicted ORF	-	-	-	-	-	-	-	-	-	-	-	-	-	-	-	-	-	-	-	-	-	-	-	-	-	-	-	-	-	-	-	-
1326	ORF23_7	2142074	2143096	-	340	ORF23_7	Predicted ORF	-	-	-	-	-	-	-	-	-	-	-	-	-	-	-	-	-	-	-	-	-	-	-	-	-	-	-	-	-	-	-	-
1327	ORF23_8	2143534	2144400	-	288	ORF23_8	Predicted ORF	-	-	-	-	-	-	-	-	-	-	-	-	-	-	-	-	-	-	-	-	-	-	-	-	-	-	-	-	-	-	-	-
1328	ORF23_9	2146091	2146756	+	221	ORF23_9	Predicted ORF	-	-	-	-	-	-	-	-	-	-	-	-	-	-	-	-	-	-	-	-	-	-	-	-	-	-	-	-	-	-	-	-
1329	ORF23_10	2147017	2147442	-	141	ORF23_10	Predicted ORF	-	-	-	-	-	-	-	-	-	-	-	-	-	-	-	-	-	-	-	-	-	-	-	-	-	-	-	-	-	-	-	-
1330	ORF23_11	2147865	2148536	-	223	ORF23_11	Predicted ORF	-	-	-	-	-	-	-	-	-	-	-	-	-	-	-	-	-	-	-	-	-	-	-	-	-	-	-	-	-	-	-	-
1331	ORF23_13	2150309	2151049	-	246	ORF23_13	Predicted ORF	-	-	-	-	-	-	-	-	-	-	-	-	-	-	-	-	-	-	-	-	-	-	-	-	-	-	-	-	-	-	-	-
1332	ORF23_14	2152215	2152913	-	232	ORF23_14	Predicted ORF	-	-	-	-	-	-	-	-	-	-	-	-	-	-	-	-	-	-	-	-	-	-	-	-	-	-	-	-	-	-	-	-
1333	ORF23_15	2153486	2154217	-	243	ORF23_15	Predicted ORF;IS|ISEhe3_PEP3	-	-	-	-	-	-	-	-	-	-	-	-	-	-	-	-	-	-	-	-	-	-	-	-	-	-	ISAbo1_PEP3	0.77	-	-	-	-
1334	ORF23_16	2154355	2154633	-	92	ORF23_16	Predicted ORF;IS|ISGpr2_PEP	-	-	-	-	-	-	-	-	-	-	-	-	-	-	-	-	-	-	-	-	-	-	-	-	-	-	ISEhe3_PEP	0.783	-	-	-	-
1335	ORF23_18	2155916	2156404	+	162	ORF23_18	Predicted ORF	-	-	-	-	-	-	-	-	-	-	-	-	-	-	-	-	-	-	-	-	-	-	-	-	-	-	-	-	-	-	-	-
1336	ORF23_19	2156479	2157087	-	202	ORF23_19	Predicted ORF	-	-	-	-	-	-	-	-	-	-	-	-	-	-	-	-	-	-	-	-	-	-	-	-	-	-	-	-	-	-	-	-
1337	ORF23_20	2157131	2157775	+	214	ORF23_20	Predicted ORF;AR|AR_YP_001453760 macrolide transporter ATP-binding /permease protein	-	-	AR_YP_002382193	0.453	-	-	-	-	-	-	-	-	-	-	-	-	-	-	-	-	-	-	-	-	-	-	-	-	PAI_CAA21355	0.463	-	-
1338	ORF23_21	2157905	2160352	+	815	ORF23_21	Predicted ORF	-	-	-	-	-	-	-	-	-	-	-	-	-	-	-	-	-	-	-	-	-	-	-	-	-	-	-	-	-	-	-	-
1339	ORF23_22	2160472	2160753	-	93	ORF23_22	Predicted ORF	-	-	-	-	-	-	-	-	-	-	-	-	-	-	-	-	-	-	-	-	-	-	-	-	-	-	-	-	-	-	-	-
1340	ORF23_24	2161878	2164055	-	725	ORF23_24	Predicted ORF;VF|VFG1396 (gi:15609045) katG - katG	VFG1862	0.773	-	-	-	-	-	-	-	-	-	-	-	-	-	-	-	-	-	-	-	-	-	-	-	-	-	-	-	-	-	-
1341	ORF23_25	2164603	2165118	+	171	ORF23_25	Predicted ORF	-	-	-	-	-	-	-	-	-	-	-	-	-	-	-	-	-	-	-	-	-	-	-	-	-	-	-	-	-	-	-	-
1342	ORF23_26	2165157	2165603	+	148	ORF23_26	Predicted ORF	-	-	-	-	-	-	-	-	-	-	-	-	-	-	-	-	-	-	-	-	-	-	-	-	-	-	-	-	-	-	-	-
1343	ORF23_27	2165687	2166586	+	299	ORF23_27	Predicted ORF;	-	-	CBMAR_F9AAF8	0.488	-	-	-	-	-	-	-	-	-	-	-	-	-	-	-	-	-	-	-	-	-	-	-	-	-	-	-	-
1344	ORF23_28	2166690	2167172	+	160	ORF23_28	Predicted ORF	-	-	-	-	-	-	-	-	-	-	-	-	-	-	-	-	-	-	-	-	-	-	-	-	-	-	-	-	-	-	-	-
1345	ORF23_29	2167288	2167749	+	153	ORF23_29	Predicted ORF	-	-	-	-	-	-	-	-	-	-	-	-	-	-	-	-	-	-	-	-	-	-	-	-	-	-	-	-	-	-	-	-
1346	ORF23_30	2168197	2168640	+	147	ORF23_30	Predicted ORF	-	-	-	-	-	-	-	-	-	-	-	-	-	-	-	-	-	-	-	-	-	-	-	-	-	-	-	-	-	-	-	-
1347	ORF23_31	2168958	2169197	+	79	ORF23_31	Predicted ORF	-	-	-	-	-	-	-	-	-	-	-	-	-	-	-	-	-	-	-	-	-	-	-	-	-	-	-	-	-	-	-	-
1348	ORF23_32	2169422	2170084	+	220	ORF23_32	Predicted ORF	-	-	-	-	-	-	-	-	-	-	-	-	-	-	-	-	-	-	-	-	-	-	-	-	-	-	-	-	-	-	-	-
1349	ORF23_33	2170742	2170891	+	49	ORF23_33	Predicted ORF	-	-	-	-	-	-	-	-	-	-	-	-	-	-	-	-	-	-	-	-	-	-	-	-	-	-	-	-	-	-	-	-
1350	ORF23_34	2171896	2172450	-	184	ORF23_34	Predicted ORF	-	-	-	-	-	-	-	-	-	-	-	-	-	-	-	-	-	-	-	-	-	-	-	-	-	-	-	-	-	-	-	-
1351	ORF23_35	2172579	2173277	+	232	ORF23_35	Predicted ORF	-	-	-	-	-	-	-	-	-	-	-	-	-	-	-	-	-	-	-	-	-	-	-	-	-	-	-	-	-	-	-	-
1352	ORF23_36	2173462	2174055	-	197	ORF23_36	Predicted ORF	-	-	-	-	-	-	-	-	-	-	-	-	-	-	-	-	-	-	-	-	-	-	-	-	-	-	-	-	-	-	-	-
1353	ORF23_38	2176165	2176578	+	137	ORF23_38	Predicted ORF	-	-	-	-	-	-	-	-	-	-	-	-	-	-	-	-	-	-	-	-	-	-	-	-	-	-	-	-	-	-	-	-
1354	ORF23_41	2179805	2180281	+	158	ORF23_41	Predicted ORF	-	-	-	-	-	-	-	-	-	-	-	-	-	-	-	-	-	-	-	-	-	-	-	-	-	-	-	-	-	-	-	-
1355	ORF23_42	2180370	2181167	-	265	ORF23_42	Predicted ORF	-	-	-	-	-	-	-	-	-	-	-	-	-	-	-	-	-	-	-	-	-	-	-	-	-	-	-	-	-	-	-	-
1356	ORF23_44	2182052	2182471	-	139	ORF23_44	Predicted ORF	-	-	-	-	-	-	-	-	-	-	-	-	-	-	-	-	-	-	-	-	-	-	-	-	-	-	-	-	-	-	-	-
1357	ORF23_46	2183404	2183994	-	196	ORF23_46	Predicted ORF	-	-	-	-	-	-	-	-	-	-	-	-	-	-	-	-	-	-	-	-	-	-	-	-	-	-	-	-	-	-	-	-
1358	ORF23_50	2188882	2189637	+	251	ORF23_50	Predicted ORF	-	-	-	-	-	-	-	-	-	-	-	-	-	-	-	-	-	-	-	-	-	-	-	-	-	-	-	-	-	-	-	-
1359	ORF23_52	2190760	2191896	+	378	ORF23_52	Predicted ORF	-	-	-	-	-	-	-	-	-	-	-	-	-	-	-	-	-	-	-	-	-	-	-	-	-	-	-	-	-	-	-	-
1360	ORF23_53	2192058	2193599	+	513	ORF23_53	Predicted ORF	-	-	-	-	-	-	-	-	-	-	-	-	-	-	-	-	-	-	-	-	-	-	-	-	-	-	-	-	-	-	-	-
1361	ORF23_55	2195419	2196399	-	326	ORF23_55	Predicted ORF	-	-	-	-	-	-	-	-	-	-	-	-	-	-	-	-	-	-	-	-	-	-	-	-	-	-	-	-	-	-	-	-
1362	ORF23_56	2196629	2199274	+	881	ORF23_56	Predicted ORF	-	-	-	-	-	-	-	-	-	-	-	-	-	-	-	-	-	-	-	-	-	-	-	-	-	-	-	-	-	-	-	-
1363	ORF23_58	2202258	2203133	-	291	ORF23_58	Predicted ORF;PAI|PAI_AAL08451 ATP-binding protein FecE	VFG0925	0.443	-	-	-	-	-	-	-	-	-	-	-	-	-	-	-	-	-	-	-	-	-	-	-	-	-	-	PAI_AAL08451	0.423	ARI_15808722	0.423
1364	ORF23_62	2206702	2210616	+	1304	ORF23_62	Predicted ORF	-	-	-	-	-	-	-	-	-	-	-	-	-	-	-	-	-	-	-	-	-	-	-	-	-	-	-	-	-	-	-	-
1365	ORF23_63	2210792	2211841	-	349	ORF23_63	Predicted ORF	-	-	-	-	-	-	-	-	-	-	-	-	-	-	-	-	-	-	-	-	-	-	-	-	-	-	-	-	-	-	-	-
1366	ORF23_64	2212304	2213209	+	301	ORF23_64	Predicted ORF	-	-	-	-	-	-	-	-	-	-	-	-	-	-	-	-	-	-	-	-	-	-	-	-	-	-	-	-	-	-	-	-
1367	ORF23_65	2213431	2214372	+	313	ORF23_65	Predicted ORF	-	-	-	-	-	-	-	-	-	-	-	-	-	-	-	-	-	-	-	-	-	-	-	-	-	-	-	-	-	-	-	-
1368	ORF23_66	2214410	2215543	+	377	ORF23_66	Predicted ORF	-	-	-	-	-	-	-	-	-	-	-	-	-	-	-	-	-	-	-	-	-	-	-	-	-	-	-	-	-	-	-	-
1369	ORF23_67	2215726	2216457	-	243	ORF23_67	Predicted ORF	-	-	-	-	-	-	-	-	-	-	-	-	-	-	-	-	-	-	-	-	-	-	-	-	-	-	-	-	-	-	-	-
1370	ORF23_68	2216596	2216994	+	132	ORF23_68	Predicted ORF	-	-	-	-	-	-	-	-	-	-	-	-	-	-	-	-	-	-	-	-	-	-	-	-	-	-	-	-	-	-	-	-
1371	ORF23_70	2219209	2219913	-	234	ORF23_70	Predicted ORF	-	-	-	-	-	-	-	-	-	-	-	-	-	-	-	-	-	-	-	-	-	-	-	-	-	-	-	-	-	-	-	-
1372	ORF23_71	2220095	2220472	-	125	ORF23_71	Predicted ORF	-	-	-	-	-	-	-	-	-	-	-	-	-	-	-	-	-	-	-	-	-	-	-	-	-	-	-	-	-	-	-	-
1373	ORF23_73	2221858	2222283	-	141	ORF23_73	Predicted ORF	-	-	-	-	-	-	-	-	-	-	-	-	-	-	-	-	-	-	-	-	-	-	-	-	-	-	-	-	-	-	-	-
1374	ORF23_74	2222602	2224131	+	509	ORF23_74	Predicted ORF	-	-	-	-	-	-	-	-	-	-	-	-	-	-	-	-	-	-	-	-	-	-	-	-	-	-	-	-	-	-	-	-
1375	ORF23_75	2224116	2225207	+	363	ORF23_75	Predicted ORF	-	-	-	-	-	-	-	-	-	-	-	-	-	-	-	-	-	-	-	-	-	-	-	-	-	-	-	-	-	-	-	-
1376	ORF23_76	2225204	2226013	+	269	ORF23_76	Predicted ORF	-	-	-	-	-	-	-	-	-	-	-	-	-	-	-	-	-	-	-	-	-	-	-	-	-	-	-	-	-	-	-	-
1377	ORF23_79	2227714	2227923	+	69	ORF23_79	Predicted ORF;Prophage|Prophage_13095918 NC_002671 Csp {Lactococcus phage bIL312}	-	-	-	-	-	-	-	-	-	-	-	-	Prophage_13095918	0.623	-	-	-	-	-	-	-	-	-	-	-	-	-	-	PAI_AAO18076	0.623	-	-
1378	ORF23_80	2228482	2228724	-	80	ORF23_80	Predicted ORF	-	-	-	-	-	-	-	-	-	-	-	-	-	-	-	-	-	-	-	-	-	-	-	-	-	-	-	-	-	-	-	-
1379	ORF23_86	2233172	2235559	-	795	ORF23_86	Predicted ORF	-	-	-	-	-	-	-	-	-	-	-	-	-	-	-	-	-	-	-	-	-	-	-	-	-	-	-	-	-	-	-	-
1380	ORF23_87	2235578	2236564	-	328	ORF23_87	Predicted ORF	-	-	-	-	-	-	-	-	-	-	-	-	-	-	-	-	-	-	-	-	-	-	-	-	-	-	-	-	-	-	-	-
1381	ORF23_88	2237122	2237478	-	118	ORF23_88	Predicted ORF	-	-	-	-	-	-	-	-	-	-	-	-	-	-	-	-	-	-	-	-	-	-	-	-	-	-	-	-	-	-	-	-
1382	ORF23_89	2237517	2237714	-	65	ORF23_89	Predicted ORF	-	-	-	-	-	-	-	-	-	-	-	-	-	-	-	-	-	-	-	-	-	-	-	-	-	-	-	-	-	-	-	-
1383	ORF23_90	2237802	2238143	-	113	ORF23_90	Predicted ORF	-	-	-	-	-	-	-	-	-	-	-	-	-	-	-	-	-	-	-	-	-	-	-	-	-	-	-	-	-	-	-	-
1384	ORF23_91	2238349	2240277	-	642	ORF23_91	Predicted ORF	-	-	-	-	-	-	-	-	-	-	-	-	-	-	-	-	-	-	-	-	-	-	-	-	-	-	-	-	-	-	-	-
1385	ORF23_92	2240639	2240920	-	93	ORF23_92	Predicted ORF	-	-	-	-	-	-	-	-	-	-	-	-	-	-	-	-	-	-	-	-	-	-	-	-	-	-	-	-	-	-	-	-
1386	ORF23_93	2241383	2242252	+	289	ORF23_93	Predicted ORF	-	-	-	-	-	-	-	-	-	-	-	-	-	-	-	-	-	-	-	-	-	-	-	-	-	-	-	-	-	-	-	-
1387	ORF23_95	2243244	2243447	+	67	ORF23_95	Predicted ORF	-	-	-	-	-	-	-	-	-	-	-	-	-	-	-	-	-	-	-	-	-	-	-	-	-	-	-	-	-	-	-	-
1388	ORF23_96	2243552	2244199	-	215	ORF23_96	Predicted ORF	-	-	-	-	-	-	-	-	-	-	-	-	-	-	-	-	-	-	-	-	-	-	-	-	-	-	-	-	-	-	-	-
1389	ORF23_97	2244196	2244843	-	215	ORF23_97	Predicted ORF	-	-	-	-	-	-	-	-	-	-	-	-	-	-	-	-	-	-	-	-	-	-	-	-	-	-	-	-	-	-	-	-
1390	ORF23_98	2245146	2246516	+	456	ORF23_98	Predicted ORF;AR|AR_YP_001570595 multidrug efflux protein	-	-	AR_YP_001176513	0.643	-	-	-	-	-	-	-	-	-	-	-	-	-	-	-	-	-	-	-	-	-	-	-	-	-	-	-	-
1391	ORF23_99	2246654	2246833	-	59	ORF23_99	Predicted ORF	-	-	-	-	-	-	-	-	-	-	-	-	-	-	-	-	-	-	-	-	-	-	-	-	-	-	-	-	-	-	-	-
1392	ORF23_100	2246950	2247216	-	88	ORF23_100	Predicted ORF	-	-	-	-	-	-	-	-	-	-	-	-	-	-	-	-	-	-	-	-	-	-	-	-	-	-	-	-	-	-	-	-
1393	ORF23_102	2249518	2249949	-	143	ORF23_102	Predicted ORF	-	-	-	-	-	-	-	-	-	-	-	-	-	-	-	-	-	-	-	-	-	-	-	-	-	-	-	-	-	-	-	-
1394	ORF23_103	2249984	2250439	-	151	ORF23_103	Predicted ORF	-	-	-	-	-	-	-	-	-	-	-	-	-	-	-	-	-	-	-	-	-	-	-	-	-	-	-	-	-	-	-	-
1395	ORF23_104	2251117	2252595	-	492	ORF23_104	Predicted ORF	-	-	-	-	-	-	-	-	-	-	-	-	-	-	-	-	-	-	-	-	-	-	-	-	-	-	-	-	-	-	-	-
1396	ORF23_105	2252910	2253278	+	122	ORF23_105	Predicted ORF	-	-	-	-	-	-	-	-	-	-	-	-	-	-	-	-	-	-	-	-	-	-	-	-	-	-	-	-	-	-	-	-
1397	ORF23_107	2254303	2254797	-	164	ORF23_107	Predicted ORF	-	-	-	-	-	-	-	-	-	-	-	-	-	-	-	-	-	-	-	-	-	-	-	-	-	-	-	-	-	-	-	-
1398	ORF23_108	2254983	2255195	+	70	ORF23_108	Predicted ORF	-	-	-	-	-	-	-	-	-	-	-	-	-	-	-	-	-	-	-	-	-	-	-	-	-	-	-	-	-	-	-	-
1399	ORF23_109	2255312	2256139	+	275	ORF23_109	Predicted ORF	-	-	-	-	-	-	-	-	-	-	-	-	-	-	-	-	-	-	-	-	-	-	-	-	-	-	-	-	-	-	-	-
1400	ORF23_111	2258109	2259611	-	500	ORF23_111	Predicted ORF	-	-	-	-	-	-	-	-	-	-	-	-	-	-	-	-	-	-	-	-	-	-	-	-	-	-	-	-	-	-	-	-
1401	ORF23_112	2260061	2261668	-	535	ORF23_112	Predicted ORF	-	-	-	-	-	-	-	-	-	-	-	-	-	-	-	-	-	-	-	-	-	-	-	-	-	-	-	-	-	-	-	-
1402	ORF23_113	2261681	2262202	-	173	ORF23_113	Predicted ORF	-	-	-	-	-	-	-	-	-	-	-	-	-	-	-	-	-	-	-	-	-	-	-	-	-	-	-	-	-	-	-	-
1403	ORF23_114	2262335	2262823	+	162	ORF23_114	Predicted ORF	-	-	-	-	-	-	-	-	-	-	-	-	-	-	-	-	-	-	-	-	-	-	-	-	-	-	-	-	-	-	-	-
1404	ORF23_115	2262948	2263490	+	180	ORF23_115	Predicted ORF	-	-	-	-	-	-	-	-	-	-	-	-	-	-	-	-	-	-	-	-	-	-	-	-	-	-	-	-	-	-	-	-
1405	ORF23_116	2263717	2264622	+	301	ORF23_116	Predicted ORF	-	-	-	-	-	-	-	-	-	-	-	-	-	-	-	-	-	-	-	-	-	-	-	-	-	-	-	-	-	-	-	-
1406	ORF23_117	2265062	2266471	+	469	ORF23_117	Predicted ORF	-	-	-	-	-	-	-	-	-	-	-	-	-	-	-	-	-	-	-	-	-	-	-	-	-	-	-	-	-	-	-	-
1407	ORF23_118	2266525	2267112	+	195	ORF23_118	Predicted ORF	-	-	-	-	-	-	-	-	-	-	-	-	-	-	-	-	-	-	-	-	-	-	-	-	-	-	-	-	-	-	-	-
1408	ORF23_120	2267846	2268805	+	319	ORF23_120	Predicted ORF	-	-	-	-	-	-	-	-	-	-	-	-	-	-	-	-	-	-	-	-	-	-	-	-	-	-	-	-	-	-	-	-
1409	ORF23_124	2272621	2272710	-	29	ORF23_124	Predicted ORF	-	-	-	-	-	-	-	-	-	-	-	-	-	-	-	-	-	-	-	-	-	-	-	-	-	-	-	-	-	-	-	-
1410	ORF23_125	2273089	2273619	+	176	ORF23_125	Predicted ORF	-	-	-	-	-	-	-	-	-	-	-	-	-	-	-	-	-	-	-	-	-	-	-	-	-	-	-	-	-	-	-	-
1411	ORF23_127	2275200	2275433	+	77	ORF23_127	Predicted ORF	-	-	-	-	-	-	-	-	-	-	-	-	-	-	-	-	-	-	-	-	-	-	-	-	-	-	-	-	-	-	-	-
1412	ORF23_130	2277842	2278522	+	226	ORF23_130	Predicted ORF	-	-	-	-	-	-	-	-	-	-	-	-	-	-	-	-	-	-	-	-	-	-	-	-	-	-	-	-	-	-	-	-
1413	ORF23_132	2279381	2280031	+	216	ORF23_132	Predicted ORF	-	-	-	-	-	-	-	-	-	-	-	-	-	-	-	-	-	-	-	-	-	-	-	-	-	-	-	-	-	-	-	-
1414	ORF23_135	2282579	2283067	+	162	ORF23_135	Predicted ORF	-	-	-	-	-	-	-	-	-	-	-	-	-	-	-	-	-	-	-	-	-	-	-	-	-	-	-	-	-	-	-	-
1415	ORF23_136	2283389	2284582	+	397	ORF23_136	Predicted ORF	-	-	-	-	-	-	-	-	-	-	-	-	-	-	-	-	-	-	-	-	-	-	-	-	-	-	-	-	-	-	-	-
1416	ORF23_139	2287153	2287971	-	272	ORF23_139	Predicted ORF	-	-	-	-	-	-	-	-	-	-	-	-	-	-	-	-	-	-	-	-	-	-	-	-	-	-	-	-	-	-	-	-
1417	ORF23_140	2288119	2288994	-	291	ORF23_140	Predicted ORF	-	-	-	-	-	-	-	-	-	-	-	-	-	-	-	-	-	-	-	-	-	-	-	-	-	-	-	-	-	-	-	-
1418	ORF23_141	2289394	2289561	+	55	ORF23_141	Predicted ORF	-	-	-	-	-	-	-	-	-	-	-	-	-	-	-	-	-	-	-	-	-	-	-	-	-	-	-	-	-	-	-	-
1419	ORF23_142	2289697	2290377	-	226	ORF23_142	Predicted ORF	-	-	-	-	-	-	-	-	-	-	-	-	-	-	-	-	-	-	-	-	-	-	-	-	-	-	-	-	-	-	-	-
1420	ORF23_145	2292506	2293555	-	349	ORF23_145	Predicted ORF	-	-	-	-	-	-	-	-	-	-	-	-	-	-	-	-	-	-	-	-	-	-	-	-	-	-	-	-	-	-	-	-
1421	ORF23_148	2297919	2298419	+	166	ORF23_148	Predicted ORF	-	-	-	-	-	-	-	-	-	-	-	-	-	-	-	-	-	-	-	-	-	-	-	-	-	-	-	-	-	-	-	-
1422	ORF23_151	2300026	2301456	-	476	ORF23_151	Predicted ORF	-	-	-	-	-	-	-	-	-	-	-	-	-	-	-	-	-	-	-	-	-	-	-	-	-	-	-	-	-	-	-	-
1423	ORF23_152	2301757	2302116	-	119	ORF23_152	Predicted ORF	-	-	-	-	-	-	-	-	-	-	-	-	-	-	-	-	-	-	-	-	-	-	-	-	-	-	-	-	-	-	-	-
1424	ORF23_153	2302169	2302684	-	171	ORF23_153	Predicted ORF	-	-	-	-	-	-	-	-	-	-	-	-	-	-	-	-	-	-	-	-	-	-	-	-	-	-	-	-	-	-	-	-
1425	ORF23_154	2302796	2302987	+	63	ORF23_154	Predicted ORF	-	-	-	-	-	-	-	-	-	-	-	-	-	-	-	-	-	-	-	-	-	-	-	-	-	-	-	-	-	-	-	-
1426	ORF23_155	2302961	2303242	-	93	ORF23_155	Predicted ORF	-	-	-	-	-	-	-	-	-	-	-	-	-	-	-	-	-	-	-	-	-	-	-	-	-	-	-	-	-	-	-	-
1427	ORF23_157	2304340	2304762	-	140	ORF23_157	Predicted ORF	-	-	-	-	-	-	-	-	-	-	-	-	-	-	-	-	-	-	-	-	-	-	-	-	-	-	-	-	-	-	-	-
1428	ORF23_158	2305279	2305746	-	155	ORF23_158	Predicted ORF;Prophage|Prophage_66391723 NC_007023 nrdG NrdG anaerobic nucleotide reductase subunit {Enterobacteria phage RB43}	-	-	-	-	-	-	-	-	-	-	-	-	Prophage_116326297	0.439	-	-	-	-	-	-	-	-	-	-	-	-	-	-	-	-	-	-
1429	ORF23_159	2305968	2308088	-	706	ORF23_159	Predicted ORF;Prophage|Prophage_34419247 NC_005083 nrdD anaerobic NTP reductase large subunit {Vibrio phage KVP40}	-	-	-	-	-	-	-	-	-	-	-	-	Prophage_38639964	0.61	-	-	-	-	-	-	-	-	-	-	-	-	-	-	-	-	-	-
1430	ORF23_160	2308424	2308531	-	35	ORF23_160	Predicted ORF	-	-	-	-	-	-	-	-	-	-	-	-	-	-	-	-	-	-	-	-	-	-	-	-	-	-	-	-	-	-	-	-
1431	ORF23_162	2310662	2311288	-	208	ORF23_162	Predicted ORF	-	-	-	-	-	-	-	-	-	-	-	-	-	-	-	-	-	-	-	-	-	-	-	-	-	-	-	-	-	-	-	-
1432	ORF23_164	2313608	2313832	+	74	ORF23_164	Predicted ORF	-	-	-	-	-	-	-	-	-	-	-	-	-	-	-	-	-	-	-	-	-	-	-	-	-	-	-	-	-	-	-	-
1433	ORF23_165	2314284	2315309	-	341	ORF23_165	Predicted ORF	-	-	-	-	-	-	-	-	-	-	-	-	-	-	-	-	-	-	-	-	-	-	-	-	-	-	-	-	-	-	-	-
1434	ORF23_166	2315355	2316476	-	373	ORF23_166	Predicted ORF	-	-	-	-	-	-	-	-	-	-	-	-	-	-	-	-	-	-	-	-	-	-	-	-	-	-	-	-	-	-	-	-
1435	ORF23_167	2316473	2316772	-	99	ORF23_167	Predicted ORF	-	-	-	-	-	-	-	-	-	-	-	-	-	-	-	-	-	-	-	-	-	-	-	-	-	-	-	-	-	-	-	-
1436	ORF23_169	2318049	2318390	-	113	ORF23_169	Predicted ORF	-	-	-	-	-	-	-	-	-	-	-	-	-	-	-	-	-	-	-	-	-	-	-	-	-	-	-	-	-	-	-	-
1437	ORF23_170	2318505	2319641	-	378	ORF23_170	Predicted ORF	-	-	-	-	-	-	-	-	-	-	-	-	-	-	-	-	-	-	-	-	-	-	-	-	-	-	-	-	-	-	-	-
1438	ORF23_171	2319662	2320279	-	205	ORF23_171	Predicted ORF	-	-	-	-	-	-	-	-	-	-	-	-	-	-	-	-	-	-	-	-	-	-	-	-	-	-	-	-	-	-	-	-
1439	ORF23_172	2320276	2320566	-	96	ORF23_172	Predicted ORF	-	-	-	-	-	-	-	-	-	-	-	-	-	-	-	-	-	-	-	-	-	-	-	-	-	-	-	-	-	-	-	-
1440	ORF23_173	2320566	2321141	-	191	ORF23_173	Predicted ORF	-	-	-	-	-	-	-	-	-	-	-	-	-	-	-	-	-	-	-	-	-	-	-	-	-	-	-	-	-	-	-	-
1441	ORF23_174	2321141	2322844	-	567	ORF23_174	Predicted ORF	-	-	-	-	-	-	-	-	-	-	-	-	-	-	-	-	-	-	-	-	-	-	-	-	-	-	-	-	-	-	-	-
1442	ORF23_175	2322841	2324034	-	397	ORF23_175	Predicted ORF	-	-	-	-	-	-	-	-	-	-	-	-	-	-	-	-	-	-	-	-	-	-	-	-	-	-	-	-	-	-	-	-
1443	ORF23_177	2325048	2326193	-	381	ORF23_177	Predicted ORF	-	-	-	-	-	-	-	-	-	-	-	-	-	-	-	-	-	-	-	-	-	-	-	-	-	-	-	-	-	-	-	-
1444	ORF23_178	2326429	2329275	-	948	ORF23_178	Predicted ORF	-	-	-	-	-	-	-	-	-	-	-	-	-	-	-	-	-	-	-	-	-	-	-	-	-	-	-	-	-	-	-	-
1445	ORF23_179	2329648	2329833	+	61	ORF23_179	Predicted ORF	-	-	-	-	-	-	-	-	-	-	-	-	-	-	-	-	-	-	-	-	-	-	-	-	-	-	-	-	-	-	-	-
1446	ORF23_180	2330107	2330316	+	69	ORF23_180	Predicted ORF	-	-	-	-	-	-	-	-	-	-	-	-	-	-	-	-	-	-	-	-	-	-	-	-	-	-	-	-	-	-	-	-
1447	ORF23_181	2330523	2331026	+	167	ORF23_181	Predicted ORF	-	-	-	-	-	-	-	-	-	-	-	-	-	-	-	-	-	-	-	-	-	-	-	-	-	-	-	-	-	-	-	-
1448	ORF23_182	2331095	2331346	+	83	ORF23_182	Predicted ORF	-	-	-	-	-	-	-	-	-	-	-	-	-	-	-	-	-	-	-	-	-	-	-	-	-	-	-	-	-	-	-	-
1449	ORF23_183	2331615	2332286	+	223	ORF23_183	Predicted ORF	-	-	-	-	-	-	-	-	-	-	-	-	-	-	-	-	-	-	-	-	-	-	-	-	-	-	-	-	-	-	-	-
1450	ORF23_184	2332529	2332810	-	93	ORF23_184	Predicted ORF	-	-	-	-	-	-	-	-	-	-	-	-	-	-	-	-	-	-	-	-	-	-	-	-	-	-	-	-	-	-	-	-
1451	ORF23_185	2333019	2333369	-	116	ORF23_185	Predicted ORF	-	-	-	-	-	-	-	-	-	-	-	-	-	-	-	-	-	-	-	-	-	-	-	-	-	-	-	-	-	-	-	-
1452	ORF23_186	2333599	2333793	+	64	ORF23_186	Predicted ORF	-	-	-	-	-	-	-	-	-	-	-	-	-	-	-	-	-	-	-	-	-	-	-	-	-	-	-	-	-	-	-	-
1453	ORF23_189	2337772	2339220	-	482	ORF23_189	Predicted ORF	-	-	-	-	-	-	-	-	-	-	-	-	-	-	-	-	-	-	-	-	-	-	-	-	-	-	-	-	-	-	-	-
1454	ORF23_191	2340428	2340904	+	158	ORF23_191	Predicted ORF	-	-	-	-	-	-	-	-	-	-	-	-	-	-	-	-	-	-	-	-	-	-	-	-	-	-	-	-	-	-	-	-
1455	ORF23_192	2341034	2342746	-	570	ORF23_192	Predicted ORF	-	-	-	-	-	-	-	-	-	-	-	-	-	-	-	-	-	-	-	-	-	-	-	-	-	-	-	-	-	-	-	-
1456	ORF23_193	2342822	2344246	-	474	ORF23_193	Predicted ORF	-	-	-	-	-	-	-	-	-	-	-	-	-	-	-	-	-	-	-	-	-	-	-	-	-	-	-	-	-	-	-	-
1457	ORF23_196	2346890	2347093	+	67	ORF23_196	Predicted ORF	-	-	-	-	-	-	-	-	-	-	-	-	-	-	-	-	-	-	-	-	-	-	-	-	-	-	-	-	-	-	-	-
1458	ORF23_197	2347187	2348842	-	551	ORF23_197	Predicted ORF	-	-	-	-	-	-	-	-	-	-	-	-	-	-	-	-	-	-	-	-	-	-	-	-	-	-	-	-	-	-	-	-
1459	ORF23_199	2350455	2351477	-	340	ORF23_199	Predicted ORF	-	-	-	-	-	-	-	-	-	-	-	-	-	-	-	-	-	-	-	-	-	-	-	-	-	-	-	-	-	-	-	-
1460	ORF23_201	2355076	2356041	+	321	ORF23_201	Predicted ORF	-	-	-	-	-	-	-	-	-	-	-	-	-	-	-	-	-	-	-	-	-	-	-	-	-	-	-	-	-	-	-	-
1461	ORF23_202	2356327	2357874	+	515	ORF23_202	Predicted ORF	-	-	-	-	-	-	-	-	-	-	-	-	-	-	-	-	-	-	-	-	-	-	-	-	-	-	-	-	-	-	-	-
1462	ORF23_203	2358026	2359300	+	424	ORF23_203	Predicted ORF	-	-	-	-	-	-	-	-	-	-	-	-	-	-	-	-	-	-	-	-	-	-	-	-	-	-	-	-	-	-	-	-
1463	ORF23_204	2359518	2360255	-	245	ORF23_204	Predicted ORF	-	-	-	-	-	-	-	-	-	-	-	-	-	-	-	-	-	-	-	-	-	-	-	-	-	-	-	-	-	-	-	-
1464	ORF23_205	2360488	2361597	-	369	ORF23_205	Predicted ORF	-	-	-	-	-	-	-	-	-	-	-	-	-	-	-	-	-	-	-	-	-	-	-	-	-	-	-	-	-	-	-	-
1465	ORF23_206	2361859	2362767	-	302	ORF23_206	Predicted ORF	-	-	-	-	-	-	-	-	-	-	-	-	-	-	-	-	-	-	-	-	-	-	-	-	-	-	-	-	-	-	-	-
1466	ORF23_207	2362962	2363390	+	142	ORF23_207	Predicted ORF	-	-	-	-	-	-	-	-	-	-	-	-	-	-	-	-	-	-	-	-	-	-	-	-	-	-	-	-	-	-	-	-
1467	ORF23_208	2363706	2363909	+	67	ORF23_208	Predicted ORF	-	-	-	-	-	-	-	-	-	-	-	-	-	-	-	-	-	-	-	-	-	-	-	-	-	-	-	-	-	-	-	-
1468	ORF23_209	2364245	2364583	+	112	ORF23_209	Predicted ORF	-	-	-	-	-	-	-	-	-	-	-	-	-	-	-	-	-	-	-	-	-	-	-	-	-	-	-	-	-	-	-	-
1469	ORF23_210	2365059	2365700	+	213	ORF23_210	Predicted ORF	-	-	-	-	-	-	-	-	-	-	-	-	-	-	-	-	-	-	-	-	-	-	-	-	-	-	-	-	-	-	-	-
1470	ORF23_211	2365894	2366499	+	201	ORF23_211	Predicted ORF	-	-	-	-	-	-	-	-	-	-	-	-	-	-	-	-	-	-	-	-	-	-	-	-	-	-	-	-	-	-	-	-
1471	ORF23_212	2366643	2367272	+	209	ORF23_212	Predicted ORF	-	-	-	-	-	-	-	-	-	-	-	-	-	-	-	-	-	-	-	-	-	-	-	-	-	-	-	-	-	-	-	-
1472	ORF23_213	2367436	2367849	-	137	ORF23_213	Predicted ORF	-	-	-	-	-	-	-	-	-	-	-	-	-	-	-	-	-	-	-	-	-	-	-	-	-	-	-	-	-	-	-	-
1473	ORF23_215	2369330	2370286	+	318	ORF23_215	Predicted ORF	-	-	-	-	-	-	-	-	-	-	-	-	-	-	-	-	-	-	-	-	-	-	-	-	-	-	-	-	-	-	-	-
1474	ORF23_216	2370633	2371670	+	345	ORF23_216	Predicted ORF	-	-	-	-	-	-	-	-	-	-	-	-	-	-	-	-	-	-	-	-	-	-	-	-	-	-	-	-	-	-	-	-
1475	ORF23_217	2371752	2371961	+	69	ORF23_217	Predicted ORF;Prophage|Prophage_9626273 NC_001416 int integration protein {Enterobacteria phage lambda}	-	-	-	-	-	-	-	-	-	-	-	-	Prophage_9634144	0.435	-	-	-	-	-	-	-	-	-	-	-	-	-	-	-	-	-	-
1476	ORF23_219	2373490	2374161	+	223	ORF23_219	Predicted ORF	-	-	-	-	-	-	-	-	-	-	-	-	-	-	-	-	-	-	-	-	-	-	-	-	-	-	-	-	-	-	-	-
1477	ORF23_221	2374790	2375893	+	367	ORF23_221	Predicted ORF	-	-	-	-	-	-	-	-	-	-	-	-	-	-	-	-	-	-	-	-	-	-	-	-	-	-	-	-	-	-	-	-
1478	ORF23_222	2375898	2376524	+	208	ORF23_222	Predicted ORF	-	-	-	-	-	-	-	-	-	-	-	-	-	-	-	-	-	-	-	-	-	-	-	-	-	-	-	-	-	-	-	-
1479	ORF23_223	2376552	2377919	+	455	ORF23_223	Predicted ORF	-	-	-	-	-	-	-	-	-	-	-	-	-	-	-	-	-	-	-	-	-	-	-	-	-	-	-	-	-	-	-	-
1480	ORF23_224	2378210	2378887	+	225	ORF23_224	Predicted ORF;VF|VFG0473 (gi:16767542) basR - response regulator in two-component regulatory system with BasS	VFG0475	0.662	-	-	-	-	-	-	-	-	-	-	-	-	-	-	-	-	-	-	-	-	-	-	-	-	-	-	-	-	-	-
1481	ORF23_226	2380389	2381525	+	378	ORF23_226	Predicted ORF	-	-	-	-	-	-	-	-	-	-	-	-	-	-	-	-	-	-	-	-	-	-	-	-	-	-	-	-	-	-	-	-
1482	ORF23_229	2384174	2384539	-	121	ORF23_229	Predicted ORF	-	-	-	-	-	-	-	-	-	-	-	-	-	-	-	-	-	-	-	-	-	-	-	-	-	-	-	-	-	-	-	-
1483	ORF23_230	2384796	2385020	-	74	ORF23_230	Predicted ORF	-	-	-	-	-	-	-	-	-	-	-	-	-	-	-	-	-	-	-	-	-	-	-	-	-	-	-	-	-	-	-	-
1484	ORF23_231	2385449	2385853	+	134	ORF23_231	Predicted ORF	-	-	-	-	-	-	-	-	-	-	-	-	-	-	-	-	-	-	-	-	-	-	-	-	-	-	-	-	-	-	-	-
1485	ORF23_233	2386976	2387650	+	224	ORF23_233	Predicted ORF	-	-	-	-	-	-	-	-	-	-	-	-	-	-	-	-	-	-	-	-	-	-	-	-	-	-	-	-	-	-	-	-
1486	ORF23_234	2387883	2388461	+	192	ORF23_234	Predicted ORF	-	-	-	-	-	-	-	-	-	-	-	-	-	-	-	-	-	-	-	-	-	-	-	-	-	-	-	-	-	-	-	-
1487	ORF23_235	2389013	2390020	-	335	ORF23_235	Predicted ORF	-	-	-	-	-	-	-	-	-	-	-	-	-	-	-	-	-	-	-	-	-	-	-	-	-	-	-	-	-	-	-	-
1488	ORF23_236	2390183	2390359	+	58	ORF23_236	Predicted ORF	-	-	-	-	-	-	-	-	-	-	-	-	-	-	-	-	-	-	-	-	-	-	-	-	-	-	-	-	-	-	-	-
1489	ORF23_237	2390472	2390909	-	145	ORF23_237	Predicted ORF	-	-	-	-	-	-	-	-	-	-	-	-	-	-	-	-	-	-	-	-	-	-	-	-	-	-	-	-	-	-	-	-
1490	ORF23_239	2394524	2395873	+	449	ORF23_239	Predicted ORF	-	-	-	-	-	-	-	-	-	-	-	-	-	-	-	-	-	-	-	-	-	-	-	-	-	-	-	-	-	-	-	-
1491	ORF23_240	2395987	2398368	-	793	ORF23_240	Predicted ORF	-	-	-	-	-	-	-	-	-	-	-	-	-	-	-	-	-	-	-	-	-	-	-	-	-	-	-	-	-	-	-	-
1492	ORF23_241	2398662	2399495	+	277	ORF23_241	Predicted ORF	-	-	-	-	-	-	-	-	-	-	-	-	-	-	-	-	-	-	-	-	-	-	-	-	-	-	-	-	-	-	-	-
1493	ORF23_242	2399645	2400694	+	349	ORF23_242	Predicted ORF;VF|VFG1630 (gi:14594865) orf7 - hypothetical protein	VFG1630	0.47	-	-	-	-	-	-	-	-	-	-	-	-	-	-	-	-	-	-	-	-	-	-	-	-	-	-	PAI_CAC43413	0.47	-	-
1494	ORF23_243	2400871	2401305	+	144	ORF23_243	Predicted ORF	-	-	-	-	-	-	-	-	-	-	-	-	-	-	-	-	-	-	-	-	-	-	-	-	-	-	-	-	-	-	-	-
1495	ORF23_244	2401407	2403266	-	619	ORF23_244	Predicted ORF	-	-	-	-	-	-	-	-	-	-	-	-	-	-	-	-	-	-	-	-	-	-	-	-	-	-	-	-	-	-	-	-
1496	ORF23_245	2403368	2403544	-	58	ORF23_245	Predicted ORF	-	-	-	-	-	-	-	-	-	-	-	-	-	-	-	-	-	-	-	-	-	-	-	-	-	-	-	-	-	-	-	-
1497	ORF23_246	2405206	2405622	-	138	ORF23_246	Predicted ORF;PAI|PAI_284931885|ref|ADC31743.1| putative DNA-binding protein	-	-	-	-	-	-	-	-	-	-	-	-	-	-	-	-	-	-	-	-	-	-	-	-	-	-	-	-	PAI_569550114	0.428	-	-
1498	ORF23_247	2405972	2407093	-	373	ORF23_247	Predicted ORF	-	-	-	-	-	-	-	-	-	-	-	-	-	-	-	-	-	-	-	-	-	-	-	-	-	-	-	-	-	-	-	-
1499	ORF23_248	2407408	2408730	+	440	ORF23_248	Predicted ORF	-	-	-	-	-	-	-	-	-	-	-	-	-	-	-	-	-	-	-	-	-	-	-	-	-	-	-	-	-	-	-	-
1500	ORF23_249	2408805	2409395	-	196	ORF23_249	Predicted ORF	-	-	-	-	-	-	-	-	-	-	-	-	-	-	-	-	-	-	-	-	-	-	-	-	-	-	-	-	-	-	-	-
1501	ORF23_250	2409509	2410426	-	305	ORF23_250	Predicted ORF	-	-	-	-	-	-	-	-	-	-	-	-	-	-	-	-	-	-	-	-	-	-	-	-	-	-	-	-	-	-	-	-
1502	ORF23_251	2410416	2411081	-	221	ORF23_251	Predicted ORF	-	-	-	-	-	-	-	-	-	-	-	-	-	-	-	-	-	-	-	-	-	-	-	-	-	-	-	-	-	-	-	-
1503	ORF23_252	2411439	2412452	-	337	ORF23_252	Predicted ORF	-	-	-	-	-	-	-	-	-	-	-	-	-	-	-	-	-	-	-	-	-	-	-	-	-	-	-	-	-	-	-	-
1504	ORF23_254	2415036	2415563	-	175	ORF23_254	Predicted ORF	-	-	-	-	-	-	-	-	-	-	-	-	-	-	-	-	-	-	-	-	-	-	-	-	-	-	-	-	-	-	-	-
1505	ORF23_255	2415590	2415961	-	123	ORF23_255	Predicted ORF	-	-	-	-	-	-	-	-	-	-	-	-	-	-	-	-	-	-	-	-	-	-	-	-	-	-	-	-	-	-	-	-
1506	ORF23_256	2416341	2417576	-	411	ORF23_256	Predicted ORF	-	-	-	-	-	-	-	-	-	-	-	-	-	-	-	-	-	-	-	-	-	-	-	-	-	-	-	-	-	-	-	-
1507	ORF23_257	2417644	2418336	-	230	ORF23_257	Predicted ORF	-	-	-	-	-	-	-	-	-	-	-	-	-	-	-	-	-	-	-	-	-	-	-	-	-	-	-	-	-	-	-	-
1508	ORF23_261	2421632	2422684	+	350	ORF23_261	Predicted ORF	-	-	-	-	-	-	-	-	-	-	-	-	-	-	-	-	-	-	-	-	-	-	-	-	-	-	-	-	-	-	-	-
1509	ORF23_264	2425358	2425948	+	196	ORF23_264	Predicted ORF	-	-	-	-	-	-	-	-	-	-	-	-	-	-	-	-	-	-	-	-	-	-	-	-	-	-	-	-	-	-	-	-
1510	ORF23_265	2426281	2426469	+	62	ORF23_265	Predicted ORF	-	-	-	-	-	-	-	-	-	-	-	-	-	-	-	-	-	-	-	-	-	-	-	-	-	-	-	-	-	-	-	-
1511	ORF23_266	2428129	2429118	+	329	ORF23_266	Predicted ORF	-	-	-	-	-	-	-	-	-	-	-	-	-	-	-	-	-	-	-	-	-	-	-	-	-	-	-	-	-	-	-	-
1512	ORF23_267	2429289	2430221	+	310	ORF23_267	Predicted ORF	-	-	-	-	-	-	-	-	-	-	-	-	-	-	-	-	-	-	-	-	-	-	-	-	-	-	-	-	-	-	-	-
1513	ORF23_268	2430392	2432047	-	551	ORF23_268	Predicted ORF	-	-	-	-	-	-	-	-	-	-	-	-	-	-	-	-	-	-	-	-	-	-	-	-	-	-	-	-	-	-	-	-
1514	ORF23_269	2432277	2433176	+	299	ORF23_269	Predicted ORF	-	-	-	-	-	-	-	-	-	-	-	-	-	-	-	-	-	-	-	-	-	-	-	-	-	-	-	-	-	-	-	-
1515	ORF23_270	2433505	2435160	+	551	ORF23_270	Predicted ORF	-	-	-	-	-	-	-	-	-	-	-	-	-	-	-	-	-	-	-	-	-	-	-	-	-	-	-	-	-	-	-	-
1516	ORF23_272	2436562	2437827	-	421	ORF23_272	Predicted ORF	-	-	-	-	-	-	-	-	-	-	-	-	-	-	-	-	-	-	-	-	-	-	-	-	-	-	-	-	-	-	-	-
1517	ORF23_273	2438013	2438465	-	150	ORF23_273	Predicted ORF	-	-	-	-	-	-	-	-	-	-	-	-	-	-	-	-	-	-	-	-	-	-	-	-	-	-	-	-	-	-	-	-
1518	ORF23_275	2440247	2440585	-	112	ORF23_275	Predicted ORF	-	-	-	-	-	-	-	-	-	-	-	-	-	-	-	-	-	-	-	-	-	-	-	-	-	-	-	-	-	-	-	-
1519	ORF23_276	2440988	2441569	+	193	ORF23_276	Predicted ORF;VF|VFG1421 (gi:15610982) sodA - sodA	VFG1867	0.658	-	-	-	-	-	-	-	-	-	-	-	-	-	-	-	-	-	-	-	-	-	-	-	-	-	-	-	-	-	-
1520	ORF23_277	2441858	2442574	+	238	ORF23_277	Predicted ORF	-	-	-	-	-	-	-	-	-	-	-	-	-	-	-	-	-	-	-	-	-	-	-	-	-	-	-	-	-	-	-	-
1521	ORF23_278	2443129	2445306	+	725	ORF23_278	Predicted ORF	-	-	-	-	-	-	-	-	-	-	-	-	-	-	-	-	-	-	-	-	-	-	-	-	-	-	-	-	-	-	-	-
1522	ORF23_280	2446145	2446897	-	250	ORF23_280	Predicted ORF	-	-	-	-	-	-	-	-	-	-	-	-	-	-	-	-	-	-	-	-	-	-	-	-	-	-	-	-	-	-	-	-
1523	ORF23_281	2447022	2447723	-	233	ORF23_281	Predicted ORF	-	-	-	-	-	-	-	-	-	-	-	-	-	-	-	-	-	-	-	-	-	-	-	-	-	-	-	-	-	-	-	-
1524	ORF23_282	2448211	2448975	-	254	ORF23_282	Predicted ORF	-	-	-	-	-	-	-	-	-	-	-	-	-	-	-	-	-	-	-	-	-	-	-	-	-	-	-	-	-	-	-	-
1525	ORF23_283	2449151	2449927	+	258	ORF23_283	Predicted ORF	-	-	-	-	-	-	-	-	-	-	-	-	-	-	-	-	-	-	-	-	-	-	-	-	-	-	-	-	-	-	-	-
1526	ORF23_284	2449906	2450532	-	208	ORF23_284	Predicted ORF;AR|AR_ABD04054 chloramphenicol acetyltransferase variant	-	-	AR_ZP_04417104	0.692	-	-	-	-	-	-	-	-	-	-	-	-	-	-	-	-	-	-	-	-	-	-	-	-	-	-	-	-
1527	ORF23_286	2452297	2453019	+	240	ORF23_286	Predicted ORF	-	-	-	-	-	-	-	-	-	-	-	-	-	-	-	-	-	-	-	-	-	-	-	-	-	-	-	-	-	-	-	-
1528	ORF23_287	2453237	2453680	-	147	ORF23_287	Predicted ORF	-	-	-	-	-	-	-	-	-	-	-	-	-	-	-	-	-	-	-	-	-	-	-	-	-	-	-	-	-	-	-	-
1529	ORF23_288	2453850	2454332	-	160	ORF23_288	Predicted ORF	-	-	-	-	-	-	-	-	-	-	-	-	-	-	-	-	-	-	-	-	-	-	-	-	-	-	-	-	-	-	-	-
1530	ORF23_291	2457018	2457203	+	61	ORF23_291	Predicted ORF	-	-	-	-	-	-	-	-	-	-	-	-	-	-	-	-	-	-	-	-	-	-	-	-	-	-	-	-	-	-	-	-
1531	ORF23_292	2457200	2458222	+	340	ORF23_292	Predicted ORF	-	-	-	-	-	-	-	-	-	-	-	-	-	-	-	-	-	-	-	-	-	-	-	-	-	-	-	-	-	-	-	-
1532	ORF23_293	2458392	2458880	+	162	ORF23_293	Predicted ORF	-	-	-	-	-	-	-	-	-	-	-	-	-	-	-	-	-	-	-	-	-	-	-	-	-	-	-	-	-	-	-	-
1533	ORF23_295	2461365	2461589	+	74	ORF23_295	Predicted ORF	-	-	-	-	-	-	-	-	-	-	-	-	-	-	-	-	-	-	-	-	-	-	-	-	-	-	-	-	-	-	-	-
1534	ORF23_296	2461586	2462269	+	227	ORF23_296	Predicted ORF	-	-	-	-	-	-	-	-	-	-	-	-	-	-	-	-	-	-	-	-	-	-	-	-	-	-	-	-	-	-	-	-
1535	ORF23_297	2462335	2463084	+	249	ORF23_297	Predicted ORF	-	-	-	-	-	-	-	-	-	-	-	-	-	-	-	-	-	-	-	-	-	-	-	-	-	-	-	-	-	-	-	-
1536	ORF23_298	2463227	2464174	+	315	ORF23_298	Predicted ORF	-	-	-	-	-	-	-	-	-	-	-	-	-	-	-	-	-	-	-	-	-	-	-	-	-	-	-	-	-	-	-	-
1537	ORF23_299	2464321	2465241	-	306	ORF23_299	Predicted ORF	-	-	-	-	-	-	-	-	-	-	-	-	-	-	-	-	-	-	-	-	-	-	-	-	-	-	-	-	-	-	-	-
1538	ORF23_300	2465610	2465702	+	30	ORF23_300	Predicted ORF	-	-	-	-	-	-	-	-	-	-	-	-	-	-	-	-	-	-	-	-	-	-	-	-	-	-	-	-	-	-	-	-
1539	ORF23_301	2465771	2466487	-	238	ORF23_301	Predicted ORF	-	-	-	-	-	-	-	-	-	-	-	-	-	-	-	-	-	-	-	-	-	-	-	-	-	-	-	-	-	-	-	-
1540	ORF23_302	2466956	2467888	+	310	ORF23_302	Predicted ORF	-	-	-	-	-	-	-	-	-	-	-	-	-	-	-	-	-	-	-	-	-	-	-	-	-	-	-	-	-	-	-	-
1541	ORF23_303	2467988	2468557	-	189	ORF23_303	Predicted ORF	-	-	-	-	-	-	-	-	-	-	-	-	-	-	-	-	-	-	-	-	-	-	-	-	-	-	-	-	-	-	-	-
1542	ORF23_304	2468602	2469747	-	381	ORF23_304	Predicted ORF	-	-	-	-	-	-	-	-	-	-	-	-	-	-	-	-	-	-	-	-	-	-	-	-	-	-	-	-	-	-	-	-
1543	ORF23_307	2473995	2474531	-	178	ORF23_307	Predicted ORF	-	-	-	-	-	-	-	-	-	-	-	-	-	-	-	-	-	-	-	-	-	-	-	-	-	-	-	-	-	-	-	-
1544	ORF23_308	2474721	2475176	-	151	ORF23_308	Predicted ORF	-	-	-	-	-	-	-	-	-	-	-	-	-	-	-	-	-	-	-	-	-	-	-	-	-	-	-	-	-	-	-	-
1545	ORF23_309	2475176	2476120	-	314	ORF23_309	Predicted ORF	-	-	-	-	-	-	-	-	-	-	-	-	-	-	-	-	-	-	-	-	-	-	-	-	-	-	-	-	-	-	-	-
1546	ORF23_311	2477447	2478151	-	234	ORF23_311	Predicted ORF;AR|AR_YP_002382193 macrolide transporter ATP-binding /permease protein	-	-	AR_ZP_03837411	0.423	-	-	-	-	-	-	-	-	-	-	-	-	-	-	-	-	-	-	-	-	-	-	-	-	-	-	-	-
1547	ORF23_313	2479639	2480205	+	188	ORF23_313	Predicted ORF	-	-	-	-	-	-	-	-	-	-	-	-	-	-	-	-	-	-	-	-	-	-	-	-	-	-	-	-	-	-	-	-
1548	ORF23_315	2483867	2485159	-	430	ORF23_315	Predicted ORF	-	-	-	-	-	-	-	-	-	-	-	-	-	-	-	-	-	-	-	-	-	-	-	-	-	-	-	-	-	-	-	-
1549	ORF23_316	2485291	2485833	-	180	ORF23_316	Predicted ORF	-	-	-	-	-	-	-	-	-	-	-	-	-	-	-	-	-	-	-	-	-	-	-	-	-	-	-	-	-	-	-	-
1550	ORF23_317	2486196	2487047	-	283	ORF23_317	Predicted ORF	-	-	-	-	-	-	-	-	-	-	-	-	-	-	-	-	-	-	-	-	-	-	-	-	-	-	-	-	-	-	-	-
1551	ORF23_320	2490109	2491140	-	343	ORF23_320	Predicted ORF	-	-	-	-	-	-	-	-	-	-	-	-	-	-	-	-	-	-	-	-	-	-	-	-	-	-	-	-	-	-	-	-
1552	ORF23_321	2491320	2492258	-	312	ORF23_321	Predicted ORF	-	-	-	-	-	-	-	-	-	-	-	-	-	-	-	-	-	-	-	-	-	-	-	-	-	-	-	-	-	-	-	-
1553	ORF23_322	2492255	2492710	-	151	ORF23_322	Predicted ORF	-	-	-	-	-	-	-	-	-	-	-	-	-	-	-	-	-	-	-	-	-	-	-	-	-	-	-	-	-	-	-	-
1554	ORF23_323	2492858	2493208	-	116	ORF23_323	Predicted ORF	-	-	-	-	-	-	-	-	-	-	-	-	-	-	-	-	-	-	-	-	-	-	-	-	-	-	-	-	-	-	-	-
1555	ORF23_325	2495802	2497151	+	449	ORF23_325	Predicted ORF	-	-	-	-	-	-	-	-	-	-	-	-	-	-	-	-	-	-	-	-	-	-	-	-	-	-	-	-	-	-	-	-
1556	ORF23_326	2497318	2498775	-	485	ORF23_326	Predicted ORF	-	-	-	-	-	-	-	-	-	-	-	-	-	-	-	-	-	-	-	-	-	-	-	-	-	-	-	-	-	-	-	-
1557	ORF23_327	2499704	2500492	-	262	ORF23_327	Predicted ORF	-	-	-	-	-	-	-	-	-	-	-	-	-	-	-	-	-	-	-	-	-	-	-	-	-	-	-	-	-	-	-	-
1558	ORF23_328	2500503	2501483	-	326	ORF23_328	Predicted ORF	-	-	-	-	-	-	-	-	-	-	-	-	-	-	-	-	-	-	-	-	-	-	-	-	-	-	-	-	-	-	-	-
1559	ORF23_330	2502117	2503133	-	338	ORF23_330	Predicted ORF	-	-	-	-	-	-	-	-	-	-	-	-	-	-	-	-	-	-	-	-	-	-	-	-	-	-	-	-	-	-	-	-
1560	ORF23_337	2508767	2509762	-	331	ORF23_337	Predicted ORF	-	-	-	-	-	-	-	-	-	-	-	-	-	-	-	-	-	-	-	-	-	-	-	-	-	-	-	-	-	-	-	-
1561	ORF23_338	2509809	2509976	-	55	ORF23_338	Predicted ORF	-	-	-	-	-	-	-	-	-	-	-	-	-	-	-	-	-	-	-	-	-	-	-	-	-	-	-	-	-	-	-	-
1562	ORF23_339	2509996	2510517	-	173	ORF23_339	Predicted ORF	-	-	-	-	-	-	-	-	-	-	-	-	-	-	-	-	-	-	-	-	-	-	-	-	-	-	-	-	-	-	-	-
1563	ORF23_340	2510673	2511260	+	195	ORF23_340	Predicted ORF	-	-	-	-	-	-	-	-	-	-	-	-	-	-	-	-	-	-	-	-	-	-	-	-	-	-	-	-	-	-	-	-
1564	ORF23_341	2511470	2512432	-	320	ORF23_341	Predicted ORF	-	-	-	-	-	-	-	-	-	-	-	-	-	-	-	-	-	-	-	-	-	-	-	-	-	-	-	-	-	-	-	-
1565	ORF23_342	2512666	2512836	-	56	ORF23_342	Predicted ORF	-	-	-	-	-	-	-	-	-	-	-	-	-	-	-	-	-	-	-	-	-	-	-	-	-	-	-	-	-	-	-	-
1566	ORF23_343	2512922	2516422	+	1166	ORF23_343	Predicted ORF	-	-	-	-	-	-	-	-	-	-	-	-	-	-	-	-	-	-	-	-	-	-	-	-	-	-	-	-	-	-	-	-
1567	ORF23_344	2516621	2517424	-	267	ORF23_344	Predicted ORF	-	-	-	-	-	-	-	-	-	-	-	-	-	-	-	-	-	-	-	-	-	-	-	-	-	-	-	-	-	-	-	-
1568	ORF23_345	2517631	2518722	-	363	ORF23_345	Predicted ORF	-	-	-	-	-	-	-	-	-	-	-	-	-	-	-	-	-	-	-	-	-	-	-	-	-	-	-	-	-	-	-	-
1569	ORF23_346	2518839	2520815	-	658	ORF23_346	Predicted ORF	-	-	-	-	-	-	-	-	-	-	-	-	-	-	-	-	-	-	-	-	-	-	-	-	-	-	-	-	-	-	-	-
1570	ORF23_348	2521623	2522267	-	214	ORF23_348	Predicted ORF	-	-	-	-	-	-	-	-	-	-	-	-	-	-	-	-	-	-	-	-	-	-	-	-	-	-	-	-	-	-	-	-
1571	ORF23_352	2527039	2527572	-	177	ORF23_352	Predicted ORF	-	-	-	-	-	-	-	-	-	-	-	-	-	-	-	-	-	-	-	-	-	-	-	-	-	-	-	-	-	-	-	-
1572	ORF23_353	2527603	2527803	-	66	ORF23_353	Predicted ORF	-	-	-	-	-	-	-	-	-	-	-	-	-	-	-	-	-	-	-	-	-	-	-	-	-	-	-	-	-	-	-	-
1573	ORF23_354	2527796	2528656	-	286	ORF23_354	Predicted ORF	-	-	-	-	-	-	-	-	-	-	-	-	-	-	-	-	-	-	-	-	-	-	-	-	-	-	-	-	-	-	-	-
1574	ORF23_355	2528649	2529083	-	144	ORF23_355	Predicted ORF	-	-	-	-	-	-	-	-	-	-	-	-	-	-	-	-	-	-	-	-	-	-	-	-	-	-	-	-	-	-	-	-
1575	ORF23_356	2529070	2529711	-	213	ORF23_356	Predicted ORF	-	-	-	-	-	-	-	-	-	-	-	-	-	-	-	-	-	-	-	-	-	-	-	-	-	-	-	-	-	-	-	-
1576	ORF23_357	2529708	2530550	-	280	ORF23_357	Predicted ORF	-	-	-	-	-	-	-	-	-	-	-	-	-	-	-	-	-	-	-	-	-	-	-	-	-	-	-	-	-	-	-	-
1577	ORF23_358	2530580	2532373	-	597	ORF23_358	Predicted ORF	-	-	-	-	-	-	-	-	-	-	-	-	-	-	-	-	-	-	-	-	-	-	-	-	-	-	-	-	-	-	-	-
1578	ORF23_359	2532385	2533512	-	375	ORF23_359	Predicted ORF	-	-	-	-	-	-	-	-	-	-	-	-	-	-	-	-	-	-	-	-	-	-	-	-	-	-	-	-	-	-	-	-
1579	ORF23_362	2535771	2536334	-	187	ORF23_362	Predicted ORF	-	-	-	-	-	-	-	-	-	-	-	-	-	-	-	-	-	-	-	-	-	-	-	-	-	-	-	-	-	-	-	-
1580	ORF23_365	2539575	2541194	-	539	ORF23_365	Predicted ORF	-	-	-	-	-	-	-	-	-	-	-	-	-	-	-	-	-	-	-	-	-	-	-	-	-	-	-	-	-	-	-	-
1581	ORF23_366	2541604	2542524	-	306	ORF23_366	Predicted ORF	-	-	-	-	-	-	-	-	-	-	-	-	-	-	-	-	-	-	-	-	-	-	-	-	-	-	-	-	-	-	-	-
1582	ORF23_367	2543005	2543178	+	57	ORF23_367	Predicted ORF	-	-	-	-	-	-	-	-	-	-	-	-	-	-	-	-	-	-	-	-	-	-	-	-	-	-	-	-	-	-	-	-
1583	ORF23_368	2543746	2545158	+	470	ORF23_368	Predicted ORF;VF|VFG0479 (gi:16764728) pykF - pyruvate kinase I (formerly F), fructose stimulated	VFG0479	0.855	-	-	-	-	-	-	-	-	-	-	-	-	-	-	-	-	-	-	-	-	-	-	-	-	-	-	-	-	-	-
1584	ORF23_369	2545278	2545664	-	128	ORF23_369	Predicted ORF	-	-	-	-	-	-	-	-	-	-	-	-	-	-	-	-	-	-	-	-	-	-	-	-	-	-	-	-	-	-	-	-
1585	ORF23_370	2545778	2546038	+	86	ORF23_370	Predicted ORF	-	-	-	-	-	-	-	-	-	-	-	-	-	-	-	-	-	-	-	-	-	-	-	-	-	-	-	-	-	-	-	-
1586	ORF23_371	2546137	2547471	+	444	ORF23_371	Predicted ORF	-	-	-	-	-	-	-	-	-	-	-	-	-	-	-	-	-	-	-	-	-	-	-	-	-	-	-	-	-	-	-	-
1587	ORF23_372	2547592	2547849	-	85	ORF23_372	Predicted ORF	-	-	-	-	-	-	-	-	-	-	-	-	-	-	-	-	-	-	-	-	-	-	-	-	-	-	-	-	-	-	-	-
1588	ORF23_373	2548011	2549525	-	504	ORF23_373	Predicted ORF	-	-	-	-	-	-	-	-	-	-	-	-	-	-	-	-	-	-	-	-	-	-	-	-	-	-	-	-	-	-	-	-
1589	ORF23_375	2551248	2551820	+	190	ORF23_375	Predicted ORF	-	-	-	-	-	-	-	-	-	-	-	-	-	-	-	-	-	-	-	-	-	-	-	-	-	-	-	-	-	-	-	-
1590	ORF23_376	2552021	2553295	+	424	ORF23_376	Predicted ORF	-	-	-	-	-	-	-	-	-	-	-	-	-	-	-	-	-	-	-	-	-	-	-	-	-	-	-	-	-	-	-	-
1591	ORF23_377	2553475	2554842	+	455	ORF23_377	Predicted ORF	-	-	-	-	-	-	-	-	-	-	-	-	-	-	-	-	-	-	-	-	-	-	-	-	-	-	-	-	-	-	-	-
1592	ORF23_378	2554945	2556180	-	411	ORF23_378	Predicted ORF	-	-	-	-	-	-	-	-	-	-	-	-	-	-	-	-	-	-	-	-	-	-	-	-	-	-	-	-	-	-	-	-
1593	ORF23_380	2557840	2558601	+	253	ORF23_380	Predicted ORF	-	-	-	-	-	-	-	-	-	-	-	-	-	-	-	-	-	-	-	-	-	-	-	-	-	-	-	-	-	-	-	-
1594	ORF23_382	2562056	2563447	+	463	ORF23_382	Predicted ORF;PAI|PAI_CAA21338 -	-	-	-	-	-	-	-	-	-	-	-	-	-	-	-	-	-	-	-	-	-	-	-	-	-	-	-	-	PAI_CAA21338	0.521	-	-
1595	ORF23_383	2563554	2563826	+	90	ORF23_383	Predicted ORF	-	-	-	-	-	-	-	-	-	-	-	-	-	-	-	-	-	-	-	-	-	-	-	-	-	-	-	-	-	-	-	-
1596	ORF23_384	2563937	2564359	-	140	ORF23_384	Predicted ORF	-	-	-	-	-	-	-	-	-	-	-	-	-	-	-	-	-	-	-	-	-	-	-	-	-	-	-	-	-	-	-	-
1597	ORF23_387	2566754	2567326	+	190	ORF23_387	Predicted ORF	-	-	-	-	-	-	-	-	-	-	-	-	-	-	-	-	-	-	-	-	-	-	-	-	-	-	-	-	-	-	-	-
1598	ORF23_388	2567420	2568286	-	288	ORF23_388	Predicted ORF	-	-	-	-	-	-	-	-	-	-	-	-	-	-	-	-	-	-	-	-	-	-	-	-	-	-	-	-	-	-	-	-
1599	ORF23_389	2568417	2569037	-	206	ORF23_389	Predicted ORF	-	-	-	-	-	-	-	-	-	-	-	-	-	-	-	-	-	-	-	-	-	-	-	-	-	-	-	-	-	-	-	-
1600	ORF23_390	2569039	2569974	-	311	ORF23_390	Predicted ORF	-	-	-	-	-	-	-	-	-	-	-	-	-	-	-	-	-	-	-	-	-	-	-	-	-	-	-	-	-	-	-	-
1601	ORF23_392	2572136	2572804	+	222	ORF23_392	Predicted ORF	-	-	-	-	-	-	-	-	-	-	-	-	-	-	-	-	-	-	-	-	-	-	-	-	-	-	-	-	-	-	-	-
1602	ORF23_394	2573872	2575257	+	461	ORF23_394	Predicted ORF	-	-	-	-	-	-	-	-	-	-	-	-	-	-	-	-	-	-	-	-	-	-	-	-	-	-	-	-	-	-	-	-
1603	ORF23_395	2575254	2576447	+	397	ORF23_395	Predicted ORF	-	-	-	-	-	-	-	-	-	-	-	-	-	-	-	-	-	-	-	-	-	-	-	-	-	-	-	-	-	-	-	-
1604	ORF23_396	2576444	2577253	+	269	ORF23_396	Predicted ORF	-	-	-	-	-	-	-	-	-	-	-	-	-	-	-	-	-	-	-	-	-	-	-	-	-	-	-	-	-	-	-	-
1605	ORF23_397	2577601	2577978	+	125	ORF23_397	Predicted ORF	-	-	-	-	-	-	-	-	-	-	-	-	-	-	-	-	-	-	-	-	-	-	-	-	-	-	-	-	-	-	-	-
1606	ORF23_398	2578128	2578853	+	241	ORF23_398	Predicted ORF	-	-	-	-	-	-	-	-	-	-	-	-	-	-	-	-	-	-	-	-	-	-	-	-	-	-	-	-	-	-	-	-
1607	ORF23_400	2581001	2583049	-	682	ORF23_400	Predicted ORF	-	-	-	-	-	-	-	-	-	-	-	-	-	-	-	-	-	-	-	-	-	-	-	-	-	-	-	-	-	-	-	-
1608	ORF23_401	2583145	2584020	+	291	ORF23_401	Predicted ORF	-	-	-	-	-	-	-	-	-	-	-	-	-	-	-	-	-	-	-	-	-	-	-	-	-	-	-	-	-	-	-	-
1609	ORF23_402	2584147	2584716	+	189	ORF23_402	Predicted ORF	-	-	-	-	-	-	-	-	-	-	-	-	-	-	-	-	-	-	-	-	-	-	-	-	-	-	-	-	-	-	-	-
1610	ORF23_403	2584827	2585267	+	146	ORF23_403	Predicted ORF	-	-	-	-	-	-	-	-	-	-	-	-	-	-	-	-	-	-	-	-	-	-	-	-	-	-	-	-	-	-	-	-
1611	ORF23_406	2588495	2589958	-	487	ORF23_406	Predicted ORF	-	-	-	-	-	-	-	-	-	-	-	-	-	-	-	-	-	-	-	-	-	-	-	-	-	-	-	-	-	-	-	-
1612	ORF23_407	2589963	2591480	-	505	ORF23_407	Predicted ORF	-	-	-	-	-	-	-	-	-	-	-	-	-	-	-	-	-	-	-	-	-	-	-	-	-	-	-	-	-	-	-	-
1613	ORF23_408	2591502	2593343	-	613	ORF23_408	Predicted ORF	-	-	-	-	-	-	-	-	-	-	-	-	-	-	-	-	-	-	-	-	-	-	-	-	-	-	-	-	-	-	-	-
1614	ORF23_409	2593340	2593657	-	105	ORF23_409	Predicted ORF	-	-	-	-	-	-	-	-	-	-	-	-	-	-	-	-	-	-	-	-	-	-	-	-	-	-	-	-	-	-	-	-
1615	ORF23_410	2593654	2594175	-	173	ORF23_410	Predicted ORF	-	-	-	-	-	-	-	-	-	-	-	-	-	-	-	-	-	-	-	-	-	-	-	-	-	-	-	-	-	-	-	-
1616	ORF23_411	2594186	2594725	-	179	ORF23_411	Predicted ORF	-	-	-	-	-	-	-	-	-	-	-	-	-	-	-	-	-	-	-	-	-	-	-	-	-	-	-	-	-	-	-	-
1617	ORF23_412	2594749	2595726	-	325	ORF23_412	Predicted ORF	-	-	-	-	-	-	-	-	-	-	-	-	-	-	-	-	-	-	-	-	-	-	-	-	-	-	-	-	-	-	-	-
1618	ORF23_413	2595723	2598449	-	908	ORF23_413	Predicted ORF	-	-	-	-	-	-	-	-	-	-	-	-	-	-	-	-	-	-	-	-	-	-	-	-	-	-	-	-	-	-	-	-
1619	ORF23_414	2598549	2599889	-	446	ORF23_414	Predicted ORF	-	-	-	-	-	-	-	-	-	-	-	-	-	-	-	-	-	-	-	-	-	-	-	-	-	-	-	-	-	-	-	-
1620	ORF23_415	2599886	2600386	-	166	ORF23_415	Predicted ORF	-	-	-	-	-	-	-	-	-	-	-	-	-	-	-	-	-	-	-	-	-	-	-	-	-	-	-	-	-	-	-	-
1621	ORF23_416	2600389	2602191	-	600	ORF23_416	Predicted ORF	-	-	-	-	-	-	-	-	-	-	-	-	-	-	-	-	-	-	-	-	-	-	-	-	-	-	-	-	-	-	-	-
1622	ORF23_417	2602212	2602886	-	224	ORF23_417	Predicted ORF	-	-	-	-	-	-	-	-	-	-	-	-	-	-	-	-	-	-	-	-	-	-	-	-	-	-	-	-	-	-	-	-
1623	ORF23_418	2602903	2603319	-	138	ORF23_418	Predicted ORF	-	-	-	-	-	-	-	-	-	-	-	-	-	-	-	-	-	-	-	-	-	-	-	-	-	-	-	-	-	-	-	-
1624	ORF23_419	2603727	2604356	-	209	ORF23_419	Predicted ORF	-	-	-	-	-	-	-	-	-	-	-	-	-	-	-	-	-	-	-	-	-	-	-	-	-	-	-	-	-	-	-	-
1625	ORF23_421	2606121	2606570	-	149	ORF23_421	Predicted ORF	-	-	-	-	-	-	-	-	-	-	-	-	-	-	-	-	-	-	-	-	-	-	-	-	-	-	-	-	-	-	-	-
1626	ORF23_422	2606696	2608474	+	592	ORF23_422	Predicted ORF	-	-	-	-	-	-	-	-	-	-	-	-	-	-	-	-	-	-	-	-	-	-	-	-	-	-	-	-	-	-	-	-
1627	ORF23_423	2608543	2609061	+	172	ORF23_423	Predicted ORF	-	-	-	-	-	-	-	-	-	-	-	-	-	-	-	-	-	-	-	-	-	-	-	-	-	-	-	-	-	-	-	-
1628	ORF24_1	2611078	2611149	-	23	ORF24_1	Predicted ORF	-	-	-	-	-	-	-	-	-	-	-	-	-	-	-	-	-	-	-	-	-	-	-	-	-	-	-	-	-	-	-	-
1629	ORF25_1	2611400	2611954	-	184	ORF25_1	Predicted ORF	-	-	-	-	-	-	-	-	-	-	-	-	-	-	-	-	-	-	-	-	-	-	-	-	-	-	-	-	-	-	-	-
1630	ORF25_2	2611957	2613411	-	484	ORF25_2	Predicted ORF	-	-	-	-	-	-	-	-	-	-	-	-	-	-	-	-	-	-	-	-	-	-	-	-	-	-	-	-	-	-	-	-
1631	ORF25_3	2613447	2614061	-	204	ORF25_3	Predicted ORF	-	-	-	-	-	-	-	-	-	-	-	-	-	-	-	-	-	-	-	-	-	-	-	-	-	-	-	-	-	-	-	-
1632	ORF25_6	2617883	2619046	+	387	ORF25_6	Predicted ORF	-	-	-	-	-	-	-	-	-	-	-	-	-	-	-	-	-	-	-	-	-	-	-	-	-	-	-	-	-	-	-	-
1633	ORF25_7	2619150	2619809	-	219	ORF25_7	Predicted ORF	-	-	-	-	-	-	-	-	-	-	-	-	-	-	-	-	-	-	-	-	-	-	-	-	-	-	-	-	-	-	-	-
1634	ORF25_8	2619965	2620138	-	57	ORF25_8	Predicted ORF	-	-	-	-	-	-	-	-	-	-	-	-	-	-	-	-	-	-	-	-	-	-	-	-	-	-	-	-	-	-	-	-
1635	ORF25_10	2620643	2620912	-	89	ORF25_10	Predicted ORF	-	-	-	-	-	-	-	-	-	-	-	-	-	-	-	-	-	-	-	-	-	-	-	-	-	-	-	-	-	-	-	-
1636	ORF25_11	2621193	2621540	+	115	ORF25_11	Predicted ORF	-	-	-	-	-	-	-	-	-	-	-	-	-	-	-	-	-	-	-	-	-	-	-	-	-	-	-	-	-	-	-	-
1637	ORF25_13	2622540	2623121	-	193	ORF25_13	Predicted ORF	-	-	-	-	-	-	-	-	-	-	-	-	-	-	-	-	-	-	-	-	-	-	-	-	-	-	-	-	-	-	-	-
1638	ORF25_14	2623391	2623984	-	197	ORF25_14	Predicted ORF	-	-	-	-	-	-	-	-	-	-	-	-	-	-	-	-	-	-	-	-	-	-	-	-	-	-	-	-	-	-	-	-
1639	ORF25_15	2624075	2625004	+	309	ORF25_15	Predicted ORF	-	-	-	-	-	-	-	-	-	-	-	-	-	-	-	-	-	-	-	-	-	-	-	-	-	-	-	-	-	-	-	-
1640	ORF25_16	2625006	2627078	+	690	ORF25_16	Predicted ORF	-	-	-	-	-	-	-	-	-	-	-	-	-	-	-	-	-	-	-	-	-	-	-	-	-	-	-	-	-	-	-	-
1641	ORF25_21	2635561	2635989	-	142	ORF25_21	Predicted ORF	-	-	-	-	-	-	-	-	-	-	-	-	-	-	-	-	-	-	-	-	-	-	-	-	-	-	-	-	-	-	-	-
1642	ORF25_23	2637418	2638281	-	287	ORF25_23	Predicted ORF	-	-	-	-	-	-	-	-	-	-	-	-	-	-	-	-	-	-	-	-	-	-	-	-	-	-	-	-	-	-	-	-
1643	ORF25_25	2639887	2640420	-	177	ORF25_25	Predicted ORF	-	-	-	-	-	-	-	-	-	-	-	-	-	-	-	-	-	-	-	-	-	-	-	-	-	-	-	-	-	-	-	-
1644	ORF25_26	2640435	2640905	-	156	ORF25_26	Predicted ORF	-	-	-	-	-	-	-	-	-	-	-	-	-	-	-	-	-	-	-	-	-	-	-	-	-	-	-	-	-	-	-	-
1645	ORF25_27	2640943	2641200	-	85	ORF25_27	Predicted ORF	-	-	-	-	-	-	-	-	-	-	-	-	-	-	-	-	-	-	-	-	-	-	-	-	-	-	-	-	-	-	-	-
1646	ORF25_28	2641258	2642058	-	266	ORF25_28	Predicted ORF	-	-	-	-	-	-	-	-	-	-	-	-	-	-	-	-	-	-	-	-	-	-	-	-	-	-	-	-	-	-	-	-
1647	ORF25_29	2642067	2642447	-	126	ORF25_29	Predicted ORF	-	-	-	-	-	-	-	-	-	-	-	-	-	-	-	-	-	-	-	-	-	-	-	-	-	-	-	-	-	-	-	-
1648	ORF25_30	2643166	2643792	-	208	ORF25_30	Predicted ORF	-	-	-	-	-	-	-	-	-	-	-	-	-	-	-	-	-	-	-	-	-	-	-	-	-	-	-	-	-	-	-	-
1649	ORF25_31	2643824	2645713	-	629	ORF25_31	Predicted ORF	-	-	-	-	-	-	-	-	-	-	-	-	-	-	-	-	-	-	-	-	-	-	-	-	-	-	-	-	-	-	-	-
1650	ORF25_32	2646116	2646562	-	148	ORF25_32	Predicted ORF	-	-	-	-	-	-	-	-	-	-	-	-	-	-	-	-	-	-	-	-	-	-	-	-	-	-	-	-	-	-	-	-
1651	ORF25_35	2650665	2652287	-	540	ORF25_35	Predicted ORF	-	-	-	-	-	-	-	-	-	-	-	-	-	-	-	-	-	-	-	-	-	-	-	-	-	-	-	-	-	-	-	-
1652	ORF25_36	2652514	2652837	-	107	ORF25_36	Predicted ORF	-	-	-	-	-	-	-	-	-	-	-	-	-	-	-	-	-	-	-	-	-	-	-	-	-	-	-	-	-	-	-	-
1653	ORF25_37	2652891	2653025	-	44	ORF25_37	Predicted ORF	-	-	-	-	-	-	-	-	-	-	-	-	-	-	-	-	-	-	-	-	-	-	-	-	-	-	-	-	-	-	-	-
1654	ORF25_38	2653292	2653513	+	73	ORF25_38	Predicted ORF	-	-	-	-	-	-	-	-	-	-	-	-	-	-	-	-	-	-	-	-	-	-	-	-	-	-	-	-	-	-	-	-
1655	ORF25_41	2656180	2657256	+	358	ORF25_41	Predicted ORF	-	-	-	-	-	-	-	-	-	-	-	-	-	-	-	-	-	-	-	-	-	-	-	-	-	-	-	-	-	-	-	-
1656	ORF25_43	2659958	2661325	+	455	ORF25_43	Predicted ORF	-	-	-	-	-	-	-	-	-	-	-	-	-	-	-	-	-	-	-	-	-	-	-	-	-	-	-	-	-	-	-	-
1657	ORF25_51	2669638	2671644	-	668	ORF25_51	Predicted ORF	-	-	-	-	-	-	-	-	-	-	-	-	-	-	-	-	-	-	-	-	-	-	-	-	-	-	-	-	-	-	-	-
1658	ORF25_52	2671704	2673809	-	701	ORF25_52	Predicted ORF;VF|VFG2356 (gi:123442793) flhA - flagellar biosynthesis protein FlhA	VFG1263	0.515	-	-	-	-	-	-	-	-	-	-	-	-	-	-	-	-	-	-	-	-	-	-	-	-	-	-	-	-	-	-
1659	ORF25_53	2673821	2674936	-	371	ORF25_53	Predicted ORF;VF|VFG2357 (gi:123442794) flhB - flagellar biosynthetic protein FlhB	VFG1262	0.445	-	-	-	-	-	-	-	-	-	-	-	-	-	-	-	-	-	-	-	-	-	-	-	-	-	-	-	-	-	-
1660	ORF25_54	2674968	2675759	-	263	ORF25_54	Predicted ORF;VF|VFG2340 (gi:123442776) fliR - flagellar biosynthetic protein FliR	VFG1261	0.456	-	-	-	-	-	-	-	-	-	-	-	-	-	-	-	-	-	-	-	-	-	-	-	-	-	-	-	-	-	-
1661	ORF25_55	2675773	2676042	-	89	ORF25_55	Predicted ORF;VF|VFG2015 (gi:52842015) fliQ - flagellar biosynthetic protein FliQ	VFG1260	0.483	-	-	-	-	-	-	-	-	-	-	-	-	-	-	-	-	-	-	-	-	-	-	-	-	-	-	-	-	-	-
1662	ORF25_56	2676056	2676793	-	245	ORF25_56	Predicted ORF;VF|VFG2338 (gi:123442774) fliP - flagellar biosynthetic protein FliP	VFG1259	0.571	-	-	-	-	-	-	-	-	-	-	-	-	-	-	-	-	-	-	-	-	-	-	-	-	-	-	-	-	-	-
1663	ORF25_63	2682368	2683699	+	443	ORF25_63	Predicted ORF;T3SS|T3SS_SctN|T3A10010000015|ATPase|Parachlamydia acanthamoebae UV7	VFG1254	0.614	-	-	-	-	-	-	-	-	-	-	-	-	-	-	T3SS_SctN	0.44	-	-	-	-	-	-	-	-	-	-	-	-	-	-
1664	ORF25_64	2683798	2684241	+	147	ORF25_64	Predicted ORF	-	-	-	-	-	-	-	-	-	-	-	-	-	-	-	-	-	-	-	-	-	-	-	-	-	-	-	-	-	-	-	-
1665	ORF25_65	2684278	2684706	-	142	ORF25_65	Predicted ORF	-	-	-	-	-	-	-	-	-	-	-	-	-	-	-	-	-	-	-	-	-	-	-	-	-	-	-	-	-	-	-	-
1666	ORF25_66	2684715	2684990	-	91	ORF25_66	Predicted ORF	-	-	-	-	-	-	-	-	-	-	-	-	-	-	-	-	-	-	-	-	-	-	-	-	-	-	-	-	-	-	-	-
1667	ORF25_69	2686469	2686891	+	140	ORF25_69	Predicted ORF;VF|VFG2350 (gi:123442786) flgC - flagellar basal-body rod protein FlgC	VFG1992	0.486	-	-	-	-	-	-	-	-	-	-	-	-	-	-	-	-	-	-	-	-	-	-	-	-	-	-	-	-	-	-
1668	ORF25_72	2688890	2689615	+	241	ORF25_72	Predicted ORF;VF|VFG1995 (gi:52841452) flgF - flagellar basal body rod protein FlgF	VFG1239	0.433	-	-	-	-	-	-	-	-	-	-	-	-	-	-	-	-	-	-	-	-	-	-	-	-	-	-	-	-	-	-
1669	ORF25_73	2689627	2690412	+	261	ORF25_73	Predicted ORF;VF|VFG1913 (gi:15792047) flgG - flagellar basal-body rod protein	VFG1240	0.594	-	-	-	-	-	-	-	-	-	-	-	-	-	-	-	-	-	-	-	-	-	-	-	-	-	-	-	-	-	-
1670	ORF25_74	2690463	2691122	+	219	ORF25_74	Predicted ORF;VF|VFG2345 (gi:123442781) flgH - flagellar L-ring protein precursor	VFG1241	0.47	-	-	-	-	-	-	-	-	-	-	-	-	-	-	-	-	-	-	-	-	-	-	-	-	-	-	-	-	-	-
1671	ORF25_75	2691131	2692225	+	364	ORF25_75	Predicted ORF;VF|VFG2344 (gi:123442780) flgI - flagellar P-ring protein precursor	VFG1242	0.563	-	-	-	-	-	-	-	-	-	-	-	-	-	-	-	-	-	-	-	-	-	-	-	-	-	-	-	-	-	-
1672	ORF25_79	2695847	2696896	+	349	ORF25_79	Predicted ORF	-	-	-	-	-	-	-	-	-	-	-	-	-	-	-	-	-	-	-	-	-	-	-	-	-	-	-	-	-	-	-	-
1673	ORF25_83	2699996	2700286	+	96	ORF25_83	Predicted ORF	-	-	-	-	-	-	-	-	-	-	-	-	-	-	-	-	-	-	-	-	-	-	-	-	-	-	-	-	-	-	-	-
1674	ORF25_85	2701527	2702003	+	158	ORF25_85	Predicted ORF	-	-	-	-	-	-	-	-	-	-	-	-	-	-	-	-	-	-	-	-	-	-	-	-	-	-	-	-	-	-	-	-
1675	ORF25_92	2708583	2710451	+	622	ORF25_92	Predicted ORF	-	-	-	-	-	-	-	-	-	-	-	-	-	-	-	-	-	-	-	-	-	-	-	-	-	-	-	-	-	-	-	-
1676	ORF25_93	2710499	2711242	+	247	ORF25_93	Predicted ORF	-	-	-	-	-	-	-	-	-	-	-	-	-	-	-	-	-	-	-	-	-	-	-	-	-	-	-	-	-	-	-	-
1677	ORF25_94	2711544	2711963	+	139	ORF25_94	Predicted ORF	-	-	-	-	-	-	-	-	-	-	-	-	-	-	-	-	-	-	-	-	-	-	-	-	-	-	-	-	-	-	-	-
1678	ORF25_96	2713485	2714465	+	326	ORF25_96	Predicted ORF	-	-	-	-	-	-	-	-	-	-	-	-	-	-	-	-	-	-	-	-	-	-	-	-	-	-	-	-	-	-	-	-
1679	ORF25_100	2717614	2721285	-	1223	ORF25_100	Predicted ORF	-	-	-	-	-	-	-	-	-	-	-	-	-	-	-	-	-	-	-	-	-	-	-	-	-	-	-	-	-	-	-	-
1680	ORF25_101	2721273	2722391	-	372	ORF25_101	Predicted ORF	-	-	-	-	-	-	-	-	-	-	-	-	-	-	-	-	-	-	-	-	-	-	-	-	-	-	-	-	-	-	-	-
1681	ORF25_102	2722407	2724755	-	782	ORF25_102	Predicted ORF	-	-	-	-	-	-	-	-	-	-	-	-	-	-	-	-	-	-	-	-	-	-	-	-	-	-	-	-	-	-	-	-
1682	ORF25_104	2727379	2728149	-	256	ORF25_104	Predicted ORF	-	-	-	-	-	-	-	-	-	-	-	-	-	-	-	-	-	-	-	-	-	-	-	-	-	-	-	-	-	-	-	-
1683	ORF25_105	2728321	2728518	-	65	ORF25_105	Predicted ORF	-	-	-	-	-	-	-	-	-	-	-	-	-	-	-	-	-	-	-	-	-	-	-	-	-	-	-	-	-	-	-	-
1684	ORF25_106	2728840	2730429	+	529	ORF25_106	Predicted ORF	-	-	-	-	-	-	-	-	-	-	-	-	-	-	-	-	-	-	-	-	-	-	-	-	-	-	-	-	-	-	-	-
1685	ORF25_107	2730429	2730617	+	62	ORF25_107	Predicted ORF	-	-	-	-	-	-	-	-	-	-	-	-	-	-	-	-	-	-	-	-	-	-	-	-	-	-	-	-	-	-	-	-
1686	ORF25_108	2730663	2732360	+	565	ORF25_108	Predicted ORF	-	-	-	-	-	-	-	-	-	-	-	-	-	-	-	-	-	-	-	-	-	-	-	-	-	-	-	-	-	-	-	-
1687	ORF25_112	2735589	2735834	+	81	ORF25_112	Predicted ORF	-	-	-	-	-	-	-	-	-	-	-	-	-	-	-	-	-	-	-	-	-	-	-	-	-	-	-	-	-	-	-	-
1688	ORF25_113	2735745	2737100	-	451	ORF25_113	Predicted ORF	-	-	-	-	-	-	-	-	-	-	-	-	-	-	-	-	-	-	-	-	-	-	-	-	-	-	-	-	-	-	-	-
1689	ORF25_114	2737384	2738544	+	386	ORF25_114	Predicted ORF	-	-	-	-	-	-	-	-	-	-	-	-	-	-	-	-	-	-	-	-	-	-	-	-	-	-	-	-	-	-	-	-
1690	ORF25_116	2739457	2739984	-	175	ORF25_116	Predicted ORF	-	-	-	-	-	-	-	-	-	-	-	-	-	-	-	-	-	-	-	-	-	-	-	-	-	-	-	-	-	-	-	-
1691	ORF25_117	2739981	2740571	-	196	ORF25_117	Predicted ORF	-	-	-	-	-	-	-	-	-	-	-	-	-	-	-	-	-	-	-	-	-	-	-	-	-	-	-	-	-	-	-	-
1692	ORF25_118	2740808	2741077	+	89	ORF25_118	Predicted ORF	-	-	-	-	-	-	-	-	-	-	-	-	-	-	-	-	-	-	-	-	-	-	-	-	-	-	-	-	-	-	-	-
1693	ORF25_119	2741390	2742829	+	479	ORF25_119	Predicted ORF	-	-	-	-	-	-	-	-	-	-	-	-	-	-	-	-	-	-	-	-	-	-	-	-	-	-	-	-	-	-	-	-
1694	ORF25_120	2742995	2743987	+	330	ORF25_120	Predicted ORF	-	-	-	-	-	-	-	-	-	-	-	-	-	-	-	-	-	-	-	-	-	-	-	-	-	-	-	-	-	-	-	-
1695	ORF25_121	2744043	2744735	+	230	ORF25_121	Predicted ORF	-	-	-	-	-	-	-	-	-	-	-	-	-	-	-	-	-	-	-	-	-	-	-	-	-	-	-	-	-	-	-	-
1696	ORF25_122	2744908	2745555	+	215	ORF25_122	Predicted ORF	-	-	-	-	-	-	-	-	-	-	-	-	-	-	-	-	-	-	-	-	-	-	-	-	-	-	-	-	-	-	-	-
1697	ORF25_124	2746683	2747021	+	112	ORF25_124	Predicted ORF	-	-	-	-	-	-	-	-	-	-	-	-	-	-	-	-	-	-	-	-	-	-	-	-	-	-	-	-	-	-	-	-
1698	ORF25_126	2749126	2750802	+	558	ORF25_126	Predicted ORF	-	-	-	-	-	-	-	-	-	-	-	-	-	-	-	-	-	-	-	-	-	-	-	-	-	-	-	-	-	-	-	-
1699	ORF25_127	2750802	2751125	+	107	ORF25_127	Predicted ORF	-	-	-	-	-	-	-	-	-	-	-	-	-	-	-	-	-	-	-	-	-	-	-	-	-	-	-	-	-	-	-	-
1700	ORF25_128	2751154	2752080	+	308	ORF25_128	Predicted ORF;	-	-	-	-	-	-	-	-	-	-	-	-	-	-	-	-	-	-	-	-	-	-	-	-	-	-	-	-	-	-	ARI_484356542	0.438
1701	ORF25_129	2752260	2754110	+	616	ORF25_129	Predicted ORF	-	-	-	-	-	-	-	-	-	-	-	-	-	-	-	-	-	-	-	-	-	-	-	-	-	-	-	-	-	-	-	-
1702	ORF25_130	2754114	2755661	+	515	ORF25_130	Predicted ORF	-	-	-	-	-	-	-	-	-	-	-	-	-	-	-	-	-	-	-	-	-	-	-	-	-	-	-	-	-	-	-	-
1703	ORF25_132	2756978	2758456	+	492	ORF25_132	Predicted ORF	-	-	-	-	-	-	-	-	-	-	-	-	-	-	-	-	-	-	-	-	-	-	-	-	-	-	-	-	-	-	-	-
1704	ORF25_133	2759104	2759754	+	216	ORF25_133	Predicted ORF	-	-	-	-	-	-	-	-	-	-	-	-	-	-	-	-	-	-	-	-	-	-	-	-	-	-	-	-	-	-	-	-
1705	ORF25_134	2759852	2762794	-	980	ORF25_134	Predicted ORF	-	-	-	-	-	-	-	-	-	-	-	-	-	-	-	-	-	-	-	-	-	-	-	-	-	-	-	-	-	-	-	-
1706	ORF25_135	2763054	2763857	-	267	ORF25_135	Predicted ORF	-	-	-	-	-	-	-	-	-	-	-	-	-	-	-	-	-	-	-	-	-	-	-	-	-	-	-	-	-	-	-	-
1707	ORF25_136	2764129	2764401	-	90	ORF25_136	Predicted ORF	-	-	-	-	-	-	-	-	-	-	-	-	-	-	-	-	-	-	-	-	-	-	-	-	-	-	-	-	-	-	-	-
1708	ORF25_137	2764743	2767865	-	1040	ORF25_137	Predicted ORF;AR|AR_YP_001186705 multidrug efflux protein	-	-	AR_YP_001186705	0.47	-	-	-	-	-	-	-	-	-	-	-	-	-	-	-	-	-	-	-	-	-	-	-	-	-	-	-	-
1709	ORF25_142	2772802	2773242	-	146	ORF25_142	Predicted ORF	-	-	-	-	-	-	-	-	-	-	-	-	-	-	-	-	-	-	-	-	-	-	-	-	-	-	-	-	-	-	-	-
1710	ORF25_143	2774280	2775485	+	401	ORF25_143	Predicted ORF	-	-	-	-	-	-	-	-	-	-	-	-	-	-	-	-	-	-	-	-	-	-	-	-	-	-	-	-	-	-	-	-
1711	ORF25_144	2775651	2776937	+	428	ORF25_144	Predicted ORF;VF|VFG2222 (gi:17987678) manC - mannose-1-phosphate guanylyltransferase	VFG2363	0.571	-	-	-	-	-	-	-	-	-	-	-	-	-	-	-	-	-	-	-	-	-	-	-	-	-	-	-	-	-	-
1712	ORF25_145	2776939	2778321	+	460	ORF25_145	Predicted ORF;	VFG2362	0.676	-	-	-	-	-	-	-	-	-	-	-	-	-	-	-	-	-	-	-	-	-	-	-	-	-	-	-	-	ARI_484356530	0.633
1713	ORF25_146	2778487	2779602	+	371	ORF25_146	Predicted ORF;VF|VFG0321 (gi:15644675) rfbD - GDP-D-mannose dehydratase (rfbD)	VFG2365	0.739	-	-	-	-	-	-	-	-	-	-	-	-	-	-	-	-	-	-	-	-	-	-	-	-	-	-	-	-	-	-
1714	ORF25_150	2782134	2783330	+	398	ORF25_150	Predicted ORF	-	-	-	-	-	-	-	-	-	-	-	-	-	-	-	-	-	-	-	-	-	-	-	-	-	-	-	-	-	-	-	-
1715	ORF25_151	2783423	2784364	+	313	ORF25_151	Predicted ORF	-	-	-	-	-	-	-	-	-	-	-	-	-	-	-	-	-	-	-	-	-	-	-	-	-	-	-	-	-	-	-	-
1716	ORF25_156	2789244	2789945	+	233	ORF25_156	Predicted ORF	-	-	-	-	-	-	-	-	-	-	-	-	-	-	-	-	-	-	-	-	-	-	-	-	-	-	-	-	-	-	-	-
1717	ORF25_157	2790071	2790847	-	258	ORF25_157	Predicted ORF;IS|ISIba1_PEP2	-	-	-	-	-	-	-	-	-	-	-	-	-	-	-	-	-	-	-	-	-	-	-	-	-	-	ISIba1_PEP3	0.736	-	-	-	-
1718	ORF25_158	2790883	2791146	-	87	ORF25_158	Predicted ORF;IS|ISIba2_PEP3	-	-	-	-	-	-	-	-	-	-	-	-	-	-	-	-	-	-	-	-	-	-	-	-	-	-	ISIba2_PEP	0.782	-	-	-	-
1719	ORF25_160	2793974	2794675	+	233	ORF25_160	Predicted ORF	-	-	-	-	-	-	-	-	-	-	-	-	-	-	-	-	-	-	-	-	-	-	-	-	-	-	-	-	-	-	-	-
1720	ORF25_162	2795368	2796327	+	319	ORF25_162	Predicted ORF	-	-	-	-	-	-	-	-	-	-	-	-	-	-	-	-	-	-	-	-	-	-	-	-	-	-	-	-	-	-	-	-
1721	ORF25_164	2800709	2800837	-	42	ORF25_164	Predicted ORF	-	-	-	-	-	-	-	-	-	-	-	-	-	-	-	-	-	-	-	-	-	-	-	-	-	-	-	-	-	-	-	-
1722	ORF25_165	2801155	2802495	+	446	ORF25_165	Predicted ORF	-	-	-	-	-	-	-	-	-	-	-	-	-	-	-	-	-	-	-	-	-	-	-	-	-	-	-	-	-	-	-	-
1723	ORF25_167	2803153	2804145	+	330	ORF25_167	Predicted ORF	-	-	-	-	-	-	-	-	-	-	-	-	-	-	-	-	-	-	-	-	-	-	-	-	-	-	-	-	-	-	-	-
1724	ORF25_169	2805432	2805569	-	45	ORF25_169	Predicted ORF	-	-	-	-	-	-	-	-	-	-	-	-	-	-	-	-	-	-	-	-	-	-	-	-	-	-	-	-	-	-	-	-
1725	ORF25_170	2805659	2806951	+	430	ORF25_170	Predicted ORF	-	-	-	-	-	-	-	-	-	-	-	-	-	-	-	-	-	-	-	-	-	-	-	-	-	-	-	-	-	-	-	-
1726	ORF25_171	2807035	2807148	-	37	ORF25_171	Predicted ORF	-	-	-	-	-	-	-	-	-	-	-	-	-	-	-	-	-	-	-	-	-	-	-	-	-	-	-	-	-	-	-	-
1727	ORF25_172	2807209	2808345	-	378	ORF25_172	Predicted ORF	-	-	-	-	-	-	-	-	-	-	-	-	-	-	-	-	-	-	-	-	-	-	-	-	-	-	-	-	-	-	-	-
1728	ORF25_173	2808358	2809917	-	519	ORF25_173	Predicted ORF	-	-	-	-	-	-	-	-	-	-	-	-	-	-	-	-	-	-	-	-	-	-	-	-	-	-	-	-	-	-	-	-
1729	ORF25_174	2810402	2811781	+	459	ORF25_174	Predicted ORF;PAI|PAI_AAO17231 Orf77	-	-	-	-	-	-	-	-	-	-	-	-	-	-	-	-	-	-	-	-	-	-	-	-	-	-	-	-	PAI_AAO17231	0.691	-	-
1730	ORF25_175	2812104	2813480	+	458	ORF25_175	Predicted ORF;PAI|PAI_AAO17231 Orf77	-	-	-	-	-	-	-	-	-	-	-	-	-	-	-	-	-	-	-	-	-	-	-	-	-	-	-	-	PAI_AAO17231	0.712	-	-
1731	ORF25_176	2813553	2814623	+	356	ORF25_176	Predicted ORF	-	-	-	-	-	-	-	-	-	-	-	-	-	-	-	-	-	-	-	-	-	-	-	-	-	-	-	-	-	-	-	-
1732	ORF25_178	2815419	2818250	+	943	ORF25_178	Predicted ORF	-	-	-	-	-	-	-	-	-	-	-	-	-	-	-	-	-	-	-	-	-	-	-	-	-	-	-	-	-	-	-	-
1733	ORF25_179	2818316	2818786	-	156	ORF25_179	Predicted ORF	-	-	-	-	-	-	-	-	-	-	-	-	-	-	-	-	-	-	-	-	-	-	-	-	-	-	-	-	-	-	-	-
1734	ORF25_180	2819079	2820050	+	323	ORF25_180	Predicted ORF	-	-	-	-	-	-	-	-	-	-	-	-	-	-	-	-	-	-	-	-	-	-	-	-	-	-	-	-	-	-	-	-
1735	ORF25_181	2820219	2822039	+	606	ORF25_181	Predicted ORF	-	-	-	-	-	-	-	-	-	-	-	-	-	-	-	-	-	-	-	-	-	-	-	-	-	-	-	-	-	-	-	-
1736	ORF25_182	2822186	2822875	-	229	ORF25_182	Predicted ORF	-	-	-	-	-	-	-	-	-	-	-	-	-	-	-	-	-	-	-	-	-	-	-	-	-	-	-	-	-	-	-	-
1737	ORF25_184	2824261	2824833	-	190	ORF25_184	Predicted ORF	-	-	-	-	-	-	-	-	-	-	-	-	-	-	-	-	-	-	-	-	-	-	-	-	-	-	-	-	-	-	-	-
1738	ORF25_188	2831360	2831635	+	91	ORF25_188	Predicted ORF	-	-	-	-	-	-	-	-	-	-	-	-	-	-	-	-	-	-	-	-	-	-	-	-	-	-	-	-	-	-	-	-
1739	ORF25_189	2831768	2832427	+	219	ORF25_189	Predicted ORF	-	-	-	-	-	-	-	-	-	-	-	-	-	-	-	-	-	-	-	-	-	-	-	-	-	-	-	-	-	-	-	-
1740	ORF25_190	2832510	2833010	-	166	ORF25_190	Predicted ORF	-	-	-	-	-	-	-	-	-	-	-	-	-	-	-	-	-	-	-	-	-	-	-	-	-	-	-	-	-	-	-	-
1741	ORF25_191	2833160	2833294	+	44	ORF25_191	Predicted ORF	-	-	-	-	-	-	-	-	-	-	-	-	-	-	-	-	-	-	-	-	-	-	-	-	-	-	-	-	-	-	-	-
1742	ORF25_192	2833399	2834598	-	399	ORF25_192	Predicted ORF	-	-	-	-	-	-	-	-	-	-	-	-	-	-	-	-	-	-	-	-	-	-	-	-	-	-	-	-	-	-	-	-
1743	ORF25_193	2834595	2835878	-	427	ORF25_193	Predicted ORF	-	-	-	-	-	-	-	-	-	-	-	-	-	-	-	-	-	-	-	-	-	-	-	-	-	-	-	-	-	-	-	-
1744	ORF25_197	2840795	2841214	-	139	ORF25_197	Predicted ORF	-	-	-	-	-	-	-	-	-	-	-	-	-	-	-	-	-	-	-	-	-	-	-	-	-	-	-	-	-	-	-	-
1745	ORF25_198	2841211	2841390	-	59	ORF25_198	Predicted ORF	-	-	-	-	-	-	-	-	-	-	-	-	-	-	-	-	-	-	-	-	-	-	-	-	-	-	-	-	-	-	-	-
1746	ORF25_199	2841518	2842315	-	265	ORF25_199	Predicted ORF	-	-	-	-	-	-	-	-	-	-	-	-	-	-	-	-	-	-	-	-	-	-	-	-	-	-	-	-	-	-	-	-
1747	ORF25_200	2842551	2843606	-	351	ORF25_200	Predicted ORF	-	-	-	-	-	-	-	-	-	-	-	-	-	-	-	-	-	-	-	-	-	-	-	-	-	-	-	-	-	-	-	-
1748	ORF25_201	2843758	2844315	-	185	ORF25_201	Predicted ORF	-	-	-	-	-	-	-	-	-	-	-	-	-	-	-	-	-	-	-	-	-	-	-	-	-	-	-	-	-	-	-	-
1749	ORF25_202	2844737	2845084	+	115	ORF25_202	Predicted ORF	-	-	-	-	-	-	-	-	-	-	-	-	-	-	-	-	-	-	-	-	-	-	-	-	-	-	-	-	-	-	-	-
1750	ORF25_203	2845168	2846280	-	370	ORF25_203	Predicted ORF	-	-	-	-	-	-	-	-	-	-	-	-	-	-	-	-	-	-	-	-	-	-	-	-	-	-	-	-	-	-	-	-
1751	ORF25_204	2846586	2847194	+	202	ORF25_204	Predicted ORF	-	-	-	-	-	-	-	-	-	-	-	-	-	-	-	-	-	-	-	-	-	-	-	-	-	-	-	-	-	-	-	-
1752	ORF25_205	2847352	2847669	-	105	ORF25_205	Predicted ORF	-	-	-	-	-	-	-	-	-	-	-	-	-	-	-	-	-	-	-	-	-	-	-	-	-	-	-	-	-	-	-	-
1753	ORF25_206	2847659	2848279	-	206	ORF25_206	Predicted ORF	-	-	-	-	-	-	-	-	-	-	-	-	-	-	-	-	-	-	-	-	-	-	-	-	-	-	-	-	-	-	-	-
1754	ORF25_207	2848363	2848650	+	95	ORF25_207	Predicted ORF	-	-	-	-	-	-	-	-	-	-	-	-	-	-	-	-	-	-	-	-	-	-	-	-	-	-	-	-	-	-	-	-
1755	ORF26_1	2848998	2850656	-	552	ORF26_1	Predicted ORF;	-	-	-	-	-	-	-	-	-	-	-	-	-	-	-	-	-	-	-	-	-	-	-	-	-	-	-	-	-	-	ARI_12698388	0.582
1756	ORF26_4	2853069	2853692	-	207	ORF26_4	Predicted ORF	-	-	-	-	-	-	-	-	-	-	-	-	-	-	-	-	-	-	-	-	-	-	-	-	-	-	-	-	-	-	-	-
1757	ORF26_5	2853698	2855548	-	616	ORF26_5	Predicted ORF	-	-	-	-	-	-	-	-	-	-	-	-	-	-	-	-	-	-	-	-	-	-	-	-	-	-	-	-	-	-	-	-
1758	ORF26_6	2855783	2856916	+	377	ORF26_6	Predicted ORF	-	-	-	-	-	-	-	-	-	-	-	-	-	-	-	-	-	-	-	-	-	-	-	-	-	-	-	-	-	-	-	-
1759	ORF27_1	2861216	2861512	-	98	ORF27_1	Predicted ORF	-	-	-	-	-	-	-	-	-	-	-	-	-	-	-	-	-	-	-	-	-	-	-	-	-	-	-	-	-	-	-	-
1760	ORF27_3	2862748	2864178	+	476	ORF27_3	Predicted ORF	-	-	-	-	-	-	-	-	-	-	-	-	-	-	-	-	-	-	-	-	-	-	-	-	-	-	-	-	-	-	-	-
1761	ORF27_5	2865176	2866342	+	388	ORF27_5	Predicted ORF	-	-	-	-	-	-	-	-	-	-	-	-	-	-	-	-	-	-	-	-	-	-	-	-	-	-	-	-	-	-	-	-
1762	ORF27_6	2866339	2867532	+	397	ORF27_6	Predicted ORF	-	-	-	-	-	-	-	-	-	-	-	-	-	-	-	-	-	-	-	-	-	-	-	-	-	-	-	-	-	-	-	-
1763	ORF27_9	2870150	2870395	-	81	ORF27_9	Predicted ORF	-	-	-	-	-	-	-	-	-	-	-	-	-	-	-	-	-	-	-	-	-	-	-	-	-	-	-	-	-	-	-	-
1764	ORF27_10	2870512	2871855	-	447	ORF27_10	Predicted ORF	-	-	-	-	-	-	-	-	-	-	-	-	-	-	-	-	-	-	-	-	-	-	-	-	-	-	-	-	-	-	-	-
1765	ORF27_11	2871868	2872323	-	151	ORF27_11	Predicted ORF	-	-	-	-	-	-	-	-	-	-	-	-	-	-	-	-	-	-	-	-	-	-	-	-	-	-	-	-	-	-	-	-
1766	ORF27_12	2872351	2872794	-	147	ORF27_12	Predicted ORF	-	-	-	-	-	-	-	-	-	-	-	-	-	-	-	-	-	-	-	-	-	-	-	-	-	-	-	-	-	-	-	-
1767	ORF27_13	2873565	2874563	-	332	ORF27_13	Predicted ORF	-	-	-	-	-	-	-	-	-	-	-	-	-	-	-	-	-	-	-	-	-	-	-	-	-	-	-	-	-	-	-	-
1768	ORF27_15	2877236	2878279	+	347	ORF27_15	Predicted ORF	-	-	-	-	-	-	-	-	-	-	-	-	-	-	-	-	-	-	-	-	-	-	-	-	-	-	-	-	-	-	-	-
1769	ORF27_16	2878345	2879469	+	374	ORF27_16	Predicted ORF	-	-	-	-	-	-	-	-	-	-	-	-	-	-	-	-	-	-	-	-	-	-	-	-	-	-	-	-	-	-	-	-
1770	ORF27_17	2879496	2879954	+	152	ORF27_17	Predicted ORF	-	-	-	-	-	-	-	-	-	-	-	-	-	-	-	-	-	-	-	-	-	-	-	-	-	-	-	-	-	-	-	-
1771	ORF27_18	2879963	2880526	+	187	ORF27_18	Predicted ORF	-	-	-	-	-	-	-	-	-	-	-	-	-	-	-	-	-	-	-	-	-	-	-	-	-	-	-	-	-	-	-	-
1772	ORF27_19	2880572	2882041	+	489	ORF27_19	Predicted ORF	-	-	-	-	-	-	-	-	-	-	-	-	-	-	-	-	-	-	-	-	-	-	-	-	-	-	-	-	-	-	-	-
1773	ORF27_20	2882053	2885898	+	1281	ORF27_20	Predicted ORF	-	-	-	-	-	-	-	-	-	-	-	-	-	-	-	-	-	-	-	-	-	-	-	-	-	-	-	-	-	-	-	-
1774	ORF27_21	2885898	2886734	+	278	ORF27_21	Predicted ORF	-	-	-	-	-	-	-	-	-	-	-	-	-	-	-	-	-	-	-	-	-	-	-	-	-	-	-	-	-	-	-	-
1775	ORF27_22	2886780	2888225	+	481	ORF27_22	Predicted ORF	-	-	-	-	-	-	-	-	-	-	-	-	-	-	-	-	-	-	-	-	-	-	-	-	-	-	-	-	-	-	-	-
1776	ORF27_23	2888335	2888886	-	183	ORF27_23	Predicted ORF	-	-	-	-	-	-	-	-	-	-	-	-	-	-	-	-	-	-	-	-	-	-	-	-	-	-	-	-	-	-	-	-
1777	ORF27_24	2889018	2890358	+	446	ORF27_24	Predicted ORF	-	-	-	-	-	-	-	-	-	-	-	-	-	-	-	-	-	-	-	-	-	-	-	-	-	-	-	-	-	-	-	-
1778	ORF27_25	2890721	2891134	+	137	ORF27_25	Predicted ORF	-	-	-	-	-	-	-	-	-	-	-	-	-	-	-	-	-	-	-	-	-	-	-	-	-	-	-	-	-	-	-	-
1779	ORF27_26	2891138	2891665	+	175	ORF27_26	Predicted ORF	-	-	-	-	-	-	-	-	-	-	-	-	-	-	-	-	-	-	-	-	-	-	-	-	-	-	-	-	-	-	-	-
1780	ORF27_27	2891856	2892728	-	290	ORF27_27	Predicted ORF	-	-	-	-	-	-	-	-	-	-	-	-	-	-	-	-	-	-	-	-	-	-	-	-	-	-	-	-	-	-	-	-
1781	ORF27_28	2892742	2893188	-	148	ORF27_28	Predicted ORF	-	-	-	-	-	-	-	-	-	-	-	-	-	-	-	-	-	-	-	-	-	-	-	-	-	-	-	-	-	-	-	-
1782	ORF27_29	2893191	2893478	-	95	ORF27_29	Predicted ORF	-	-	-	-	-	-	-	-	-	-	-	-	-	-	-	-	-	-	-	-	-	-	-	-	-	-	-	-	-	-	-	-
1783	ORF27_30	2893504	2895003	-	499	ORF27_30	Predicted ORF	-	-	-	-	-	-	-	-	-	-	-	-	-	-	-	-	-	-	-	-	-	-	-	-	-	-	-	-	-	-	-	-
1784	ORF27_32	2895795	2896319	-	174	ORF27_32	Predicted ORF	-	-	-	-	-	-	-	-	-	-	-	-	-	-	-	-	-	-	-	-	-	-	-	-	-	-	-	-	-	-	-	-
1785	ORF27_33	2896300	2896857	-	185	ORF27_33	Predicted ORF	-	-	-	-	-	-	-	-	-	-	-	-	-	-	-	-	-	-	-	-	-	-	-	-	-	-	-	-	-	-	-	-
1786	ORF27_34	2896854	2897405	-	183	ORF27_34	Predicted ORF	-	-	-	-	-	-	-	-	-	-	-	-	-	-	-	-	-	-	-	-	-	-	-	-	-	-	-	-	-	-	-	-
1787	ORF27_37	2899473	2900255	+	260	ORF27_37	Predicted ORF	-	-	-	-	-	-	-	-	-	-	-	-	-	-	-	-	-	-	-	-	-	-	-	-	-	-	-	-	-	-	-	-
1788	ORF27_38	2900261	2900770	+	169	ORF27_38	Predicted ORF	-	-	-	-	-	-	-	-	-	-	-	-	-	-	-	-	-	-	-	-	-	-	-	-	-	-	-	-	-	-	-	-
1789	ORF27_39	2900804	2901427	+	207	ORF27_39	Predicted ORF	-	-	-	-	-	-	-	-	-	-	-	-	-	-	-	-	-	-	-	-	-	-	-	-	-	-	-	-	-	-	-	-
1790	ORF27_40	2901438	2901755	+	105	ORF27_40	Predicted ORF	-	-	-	-	-	-	-	-	-	-	-	-	-	-	-	-	-	-	-	-	-	-	-	-	-	-	-	-	-	-	-	-
1791	ORF27_41	2901765	2902022	+	85	ORF27_41	Predicted ORF	-	-	-	-	-	-	-	-	-	-	-	-	-	-	-	-	-	-	-	-	-	-	-	-	-	-	-	-	-	-	-	-
1792	ORF27_42	2902042	2903304	+	420	ORF27_42	Predicted ORF	-	-	-	-	-	-	-	-	-	-	-	-	-	-	-	-	-	-	-	-	-	-	-	-	-	-	-	-	-	-	-	-
1793	ORF27_43	2903439	2904503	-	354	ORF27_43	Predicted ORF	-	-	-	-	-	-	-	-	-	-	-	-	-	-	-	-	-	-	-	-	-	-	-	-	-	-	-	-	-	-	-	-
1794	ORF27_45	2906031	2906414	-	127	ORF27_45	Predicted ORF	-	-	-	-	-	-	-	-	-	-	-	-	-	-	-	-	-	-	-	-	-	-	-	-	-	-	-	-	-	-	-	-
1795	ORF27_46	2906573	2907715	+	380	ORF27_46	Predicted ORF	-	-	-	-	-	-	-	-	-	-	-	-	-	-	-	-	-	-	-	-	-	-	-	-	-	-	-	-	-	-	-	-
1796	ORF27_47	2907920	2908348	+	142	ORF27_47	Predicted ORF	-	-	-	-	-	-	-	-	-	-	-	-	-	-	-	-	-	-	-	-	-	-	-	-	-	-	-	-	-	-	-	-
1797	ORF27_48	2908364	2908756	+	130	ORF27_48	Predicted ORF	-	-	-	-	-	-	-	-	-	-	-	-	-	-	-	-	-	-	-	-	-	-	-	-	-	-	-	-	-	-	-	-
1798	ORF27_49	2909019	2909615	+	198	ORF27_49	Predicted ORF	-	-	-	-	-	-	-	-	-	-	-	-	-	-	-	-	-	-	-	-	-	-	-	-	-	-	-	-	-	-	-	-
1799	ORF27_50	2909616	2910830	+	404	ORF27_50	Predicted ORF	-	-	-	-	-	-	-	-	-	-	-	-	-	-	-	-	-	-	-	-	-	-	-	-	-	-	-	-	-	-	-	-
1800	ORF27_51	2910845	2911567	+	240	ORF27_51	Predicted ORF	-	-	-	-	-	-	-	-	-	-	-	-	-	-	-	-	-	-	-	-	-	-	-	-	-	-	-	-	-	-	-	-
1801	ORF27_54	2912995	2913570	-	191	ORF27_54	Predicted ORF	-	-	-	-	-	-	-	-	-	-	-	-	-	-	-	-	-	-	-	-	-	-	-	-	-	-	-	-	-	-	-	-
1802	ORF27_56	2914197	2914562	-	121	ORF27_56	Predicted ORF	-	-	-	-	-	-	-	-	-	-	-	-	-	-	-	-	-	-	-	-	-	-	-	-	-	-	-	-	-	-	-	-
1803	ORF27_57	2914559	2916496	-	645	ORF27_57	Predicted ORF	-	-	-	-	-	-	-	-	-	-	-	-	-	-	-	-	-	-	-	-	-	-	-	-	-	-	-	-	-	-	-	-
1804	ORF27_58	2916561	2917427	+	288	ORF27_58	Predicted ORF	-	-	-	-	-	-	-	-	-	-	-	-	-	-	-	-	-	-	-	-	-	-	-	-	-	-	-	-	-	-	-	-
1805	ORF27_59	2918106	2918564	+	152	ORF27_59	Predicted ORF	-	-	-	-	-	-	-	-	-	-	-	-	-	-	-	-	-	-	-	-	-	-	-	-	-	-	-	-	-	-	-	-
1806	ORF27_60	2918567	2919505	+	312	ORF27_60	Predicted ORF	-	-	-	-	-	-	-	-	-	-	-	-	-	-	-	-	-	-	-	-	-	-	-	-	-	-	-	-	-	-	-	-
1807	ORF27_61	2919505	2919819	+	104	ORF27_61	Predicted ORF	-	-	-	-	-	-	-	-	-	-	-	-	-	-	-	-	-	-	-	-	-	-	-	-	-	-	-	-	-	-	-	-
1808	ORF27_63	2921572	2923059	+	495	ORF27_63	Predicted ORF	-	-	-	-	-	-	-	-	-	-	-	-	-	-	-	-	-	-	-	-	-	-	-	-	-	-	-	-	-	-	-	-
1809	ORF27_66	2925521	2926831	+	436	ORF27_66	Predicted ORF	-	-	-	-	-	-	-	-	-	-	-	-	-	-	-	-	-	-	-	-	-	-	-	-	-	-	-	-	-	-	-	-
1810	ORF27_67	2926828	2928024	+	398	ORF27_67	Predicted ORF	-	-	-	-	-	-	-	-	-	-	-	-	-	-	-	-	-	-	-	-	-	-	-	-	-	-	-	-	-	-	-	-
1811	ORF27_68	2928021	2929088	+	355	ORF27_68	Predicted ORF	-	-	-	-	-	-	-	-	-	-	-	-	-	-	-	-	-	-	-	-	-	-	-	-	-	-	-	-	-	-	-	-
1812	ORF27_69	2929088	2930557	+	489	ORF27_69	Predicted ORF	-	-	-	-	-	-	-	-	-	-	-	-	-	-	-	-	-	-	-	-	-	-	-	-	-	-	-	-	-	-	-	-
1813	ORF27_71	2931463	2932311	+	282	ORF27_71	Predicted ORF	-	-	-	-	-	-	-	-	-	-	-	-	-	-	-	-	-	-	-	-	-	-	-	-	-	-	-	-	-	-	-	-
1814	ORF27_72	2932315	2933571	+	418	ORF27_72	Predicted ORF	-	-	-	-	-	-	-	-	-	-	-	-	-	-	-	-	-	-	-	-	-	-	-	-	-	-	-	-	-	-	-	-
1815	ORF27_73	2933611	2934780	+	389	ORF27_73	Predicted ORF	-	-	-	-	-	-	-	-	-	-	-	-	-	-	-	-	-	-	-	-	-	-	-	-	-	-	-	-	-	-	-	-
1816	ORF27_74	2934930	2935847	+	305	ORF27_74	Predicted ORF	-	-	-	-	-	-	-	-	-	-	-	-	-	-	-	-	-	-	-	-	-	-	-	-	-	-	-	-	-	-	-	-
1817	ORF27_75	2935960	2936448	-	162	ORF27_75	Predicted ORF	-	-	-	-	-	-	-	-	-	-	-	-	-	-	-	-	-	-	-	-	-	-	-	-	-	-	-	-	-	-	-	-
1818	ORF27_76	2936534	2937124	+	196	ORF27_76	Predicted ORF	-	-	-	-	-	-	-	-	-	-	-	-	-	-	-	-	-	-	-	-	-	-	-	-	-	-	-	-	-	-	-	-
1819	ORF27_77	2937234	2939942	+	902	ORF27_77	Predicted ORF	-	-	-	-	-	-	-	-	-	-	-	-	-	-	-	-	-	-	-	-	-	-	-	-	-	-	-	-	-	-	-	-
1820	ORF27_78	2940042	2940470	+	142	ORF27_78	Predicted ORF	-	-	-	-	-	-	-	-	-	-	-	-	-	-	-	-	-	-	-	-	-	-	-	-	-	-	-	-	-	-	-	-
1821	ORF27_79	2940551	2940742	-	63	ORF27_79	Predicted ORF	-	-	-	-	-	-	-	-	-	-	-	-	-	-	-	-	-	-	-	-	-	-	-	-	-	-	-	-	-	-	-	-
1822	ORF27_80	2940926	2941681	-	251	ORF27_80	Predicted ORF	-	-	-	-	-	-	-	-	-	-	-	-	-	-	-	-	-	-	-	-	-	-	-	-	-	-	-	-	-	-	-	-
1823	ORF27_81	2942059	2942667	-	202	ORF27_81	Predicted ORF	-	-	-	-	-	-	-	-	-	-	-	-	-	-	-	-	-	-	-	-	-	-	-	-	-	-	-	-	-	-	-	-
1824	ORF27_82	2942669	2943529	-	286	ORF27_82	Predicted ORF;VF|VFG0114 (gi:15599724) pilD - type 4 prepilin peptidase PilD	VFG0114	0.444	-	-	-	-	-	-	-	-	-	-	-	-	-	-	-	-	-	-	-	-	-	-	-	-	-	-	PAI_CAE85237	0.455	-	-
1825	ORF27_84	2945031	2945585	+	184	ORF27_84	Predicted ORF	-	-	-	-	-	-	-	-	-	-	-	-	-	-	-	-	-	-	-	-	-	-	-	-	-	-	-	-	-	-	-	-
1826	ORF27_85	2945660	2946895	-	411	ORF27_85	Predicted ORF;VF|VFG0235 (gi:15676248) pilG - pilus assembly protein PilG	VFG1881	0.431	-	-	-	-	-	-	-	-	-	-	-	-	-	-	-	-	-	-	-	-	-	-	-	-	-	-	-	-	-	-
1827	ORF27_86	2946897	2948399	-	500	ORF27_86	Predicted ORF;VF|VFG0233 (gi:15676245) pilF - type IV pilus assembly protein	VFG0112	0.522	-	-	-	-	-	-	-	-	-	-	-	-	-	-	-	-	-	-	-	-	-	-	-	-	-	-	-	-	-	-
1828	ORF27_88	2949268	2949411	+	47	ORF27_88	Predicted ORF	-	-	-	-	-	-	-	-	-	-	-	-	-	-	-	-	-	-	-	-	-	-	-	-	-	-	-	-	-	-	-	-
1829	ORF27_89	2949684	2950610	-	308	ORF27_89	Predicted ORF	-	-	-	-	-	-	-	-	-	-	-	-	-	-	-	-	-	-	-	-	-	-	-	-	-	-	-	-	-	-	-	-
1830	ORF27_90	2951061	2951666	+	201	ORF27_90	Predicted ORF	-	-	-	-	-	-	-	-	-	-	-	-	-	-	-	-	-	-	-	-	-	-	-	-	-	-	-	-	-	-	-	-
1831	ORF27_91	2951858	2952220	-	120	ORF27_91	Predicted ORF	-	-	-	-	-	-	-	-	-	-	-	-	-	-	-	-	-	-	-	-	-	-	-	-	-	-	-	-	-	-	-	-
1832	ORF27_92	2952561	2955158	-	865	ORF27_92	Predicted ORF	-	-	-	-	-	-	-	-	-	-	-	-	-	-	-	-	-	-	-	-	-	-	-	-	-	-	-	-	-	-	-	-
1833	ORF27_94	2958039	2959358	-	439	ORF27_94	Predicted ORF;AR|AR_ZP_02900740 outer membrane protein TolC	-	-	AR_YP_001573360	0.519	-	-	-	-	-	-	-	-	-	-	-	-	-	-	-	-	-	-	-	-	-	-	-	-	-	-	-	-
1834	ORF27_95	2959586	2960242	+	218	ORF27_95	Predicted ORF	-	-	-	-	-	-	-	-	-	-	-	-	-	-	-	-	-	-	-	-	-	-	-	-	-	-	-	-	-	-	-	-
1835	ORF27_96	2960541	2961380	+	279	ORF27_96	Predicted ORF	-	-	-	-	-	-	-	-	-	-	-	-	-	-	-	-	-	-	-	-	-	-	-	-	-	-	-	-	-	-	-	-
1836	ORF27_97	2961380	2961967	+	195	ORF27_97	Predicted ORF	-	-	-	-	-	-	-	-	-	-	-	-	-	-	-	-	-	-	-	-	-	-	-	-	-	-	-	-	-	-	-	-
1837	ORF27_102	2970373	2972268	-	631	ORF27_102	Predicted ORF	-	-	-	-	-	-	-	-	-	-	-	-	-	-	-	-	-	-	-	-	-	-	-	-	-	-	-	-	-	-	-	-
1838	ORF27_103	2972281	2974938	-	885	ORF27_103	Predicted ORF	-	-	-	-	-	-	-	-	-	-	-	-	-	-	-	-	-	-	-	-	-	-	-	-	-	-	-	-	-	-	-	-
1839	ORF27_105	2976258	2976323	+	21	ORF27_105	Predicted ORF	-	-	-	-	-	-	-	-	-	-	-	-	-	-	-	-	-	-	-	-	-	-	-	-	-	-	-	-	-	-	-	-
1840	ORF28_1	2976326	2976592	-	88	ORF28_1	Predicted ORF	-	-	-	-	-	-	-	-	-	-	-	-	-	-	-	-	-	-	-	-	-	-	-	-	-	-	-	-	-	-	-	-
1841	ORF28_2	2976919	2979360	-	813	ORF28_2	Predicted ORF	-	-	-	-	-	-	-	-	-	-	-	-	-	-	-	-	-	-	-	-	-	-	-	-	-	-	-	-	-	-	-	-
1842	ORF28_3	2979365	2980531	-	388	ORF28_3	Predicted ORF	-	-	-	-	-	-	-	-	-	-	-	-	-	-	-	-	-	-	-	-	-	-	-	-	-	-	-	-	-	-	-	-
1843	ORF28_4	2980802	2981119	+	105	ORF28_4	Predicted ORF	-	-	-	-	-	-	-	-	-	-	-	-	-	-	-	-	-	-	-	-	-	-	-	-	-	-	-	-	-	-	-	-
1844	ORF29_2	2984652	2985215	-	187	ORF29_2	Predicted ORF;Prophage|Prophage_17975181 NC_003309 putative tail component protein {Burkholderia phage phiE125}	-	-	-	-	-	-	-	-	-	-	-	-	Prophage_9626263	0.495	-	-	-	-	-	-	-	-	-	-	-	-	-	-	-	-	-	-
1845	ORF29_3	2985299	2985544	+	81	ORF29_3	Predicted ORF	-	-	-	-	-	-	-	-	-	-	-	-	-	-	-	-	-	-	-	-	-	-	-	-	-	-	-	-	-	-	-	-
1846	ORF29_4	2985891	2986595	-	234	ORF29_4	Predicted ORF;Prophage|Prophage_134288683 NC_009235 gp18 phage minor tail protein L {Burkholderia phage phi644-2}	-	-	-	-	-	-	-	-	-	-	-	-	Prophage_9626261	0.47	-	-	-	-	-	-	-	-	-	-	-	-	-	-	-	-	-	-
1847	ORF29_7	2990531	2990764	-	77	ORF29_7	Predicted ORF	-	-	-	-	-	-	-	-	-	-	-	-	-	-	-	-	-	-	-	-	-	-	-	-	-	-	-	-	-	-	-	-
1848	ORF29_9	2991135	2991605	-	156	ORF29_9	Predicted ORF;Prophage|Prophage_33770520 NC_005069 hypothetical protein {Yersinia phage PY54}	-	-	-	-	-	-	-	-	-	-	-	-	Prophage_33770520	0.538	-	-	-	-	-	-	-	-	-	-	-	-	-	-	-	-	-	-
1849	ORF29_11	2991989	2992411	-	140	ORF29_11	Predicted ORF;Prophage|Prophage_9635606 NC_002484 Orf14 {Pseudomonas phage D3}	-	-	-	-	-	-	-	-	-	-	-	-	Prophage_33770519	0.471	-	-	-	-	-	-	-	-	-	-	-	-	-	-	-	-	-	-
1850	ORF29_14	2993056	2993262	-	68	ORF29_14	Predicted ORF	-	-	-	-	-	-	-	-	-	-	-	-	-	-	-	-	-	-	-	-	-	-	-	-	-	-	-	-	-	-	-	-
1851	ORF29_15	2993313	2994524	-	403	ORF29_15	Predicted ORF;Prophage|Prophage_32128421 NC_004902 head protein major capsid subunit precursor {Xanthomonas phage Xp10}	-	-	-	-	-	-	-	-	-	-	-	-	Prophage_9635591	0.474	-	-	-	-	-	-	-	-	-	-	-	-	-	-	-	-	-	-
1852	ORF29_16	2994540	2995397	-	285	ORF29_16	Predicted ORF;Prophage|Prophage_32128420 NC_004902 protease of the ClpP family {Xanthomonas phage Xp10}	-	-	-	-	-	-	-	-	-	-	-	-	Prophage_9635590	0.516	-	-	-	-	-	-	-	-	-	-	-	-	-	-	-	-	-	-
1853	ORF29_17	2995409	2996698	-	429	ORF29_17	Predicted ORF;Prophage|Prophage_148727185 NC_009543 head portal protein {Xanthomonas phage phiXo411}	-	-	-	-	-	-	-	-	-	-	-	-	Prophage_38707893	0.466	-	-	-	-	-	-	-	-	-	-	-	-	-	-	-	-	-	-
1854	ORF29_20	2998949	2999293	-	114	ORF29_20	Predicted ORF;Prophage|Prophage_22855043 NC_004167 hypothetical protein {Bacillus phage phi105}	-	-	-	-	-	-	-	-	-	-	-	-	Prophage_9634183	0.57	-	-	-	-	-	-	-	-	-	-	-	-	-	-	-	-	-	-
1855	ORF29_21	2999378	2999572	-	64	ORF29_21	Predicted ORF	-	-	-	-	-	-	-	-	-	-	-	-	-	-	-	-	-	-	-	-	-	-	-	-	-	-	-	-	-	-	-	-
1856	ORF29_22	2999655	3000329	-	224	ORF29_22	Predicted ORF	-	-	-	-	-	-	-	-	-	-	-	-	-	-	-	-	-	-	-	-	-	-	-	-	-	-	-	-	-	-	-	-
1857	ORF29_23	3000448	3000699	-	83	ORF29_23	Predicted ORF	-	-	-	-	-	-	-	-	-	-	-	-	-	-	-	-	-	-	-	-	-	-	-	-	-	-	-	-	-	-	-	-
1858	ORF29_25	3001407	3001820	-	137	ORF29_25	Predicted ORF;Prophage|Prophage_157311403 NC_009821 hypothetical protein {Enterobacteria phage Phi1}	-	-	-	-	-	-	-	-	-	-	-	-	Prophage_157311403	0.467	-	-	-	-	-	-	-	-	-	-	-	-	-	-	PAI_CAI77378	0.547	-	-
1859	ORF29_26	3001820	3002140	-	106	ORF29_26	Predicted ORF;Prophage|Prophage_23505495 NC_004313 lysis protein (holin) {Enterobacteria phage ST64B}	-	-	-	-	-	-	-	-	-	-	-	-	Prophage_148727161	0.491	-	-	-	-	-	-	-	-	-	-	-	-	-	-	-	-	-	-
1860	ORF29_27	3002519	3002926	+	135	ORF29_27	Predicted ORF	-	-	-	-	-	-	-	-	-	-	-	-	-	-	-	-	-	-	-	-	-	-	-	-	-	-	-	-	-	-	-	-
1861	ORF29_28	3002926	3003618	+	230	ORF29_28	Predicted ORF	-	-	-	-	-	-	-	-	-	-	-	-	-	-	-	-	-	-	-	-	-	-	-	-	-	-	-	-	-	-	-	-
1862	ORF29_30	3005218	3005730	+	170	ORF29_30	Predicted ORF;VF|VFG1868 (gi:52842558) sodC - superoxide dismutase (copper-zinc)	VFG0463	0.54	-	-	-	-	-	-	-	-	-	-	-	-	-	-	-	-	-	-	-	-	-	-	-	-	-	-	-	-	-	-
1863	ORF29_31	3005986	3006096	-	36	ORF29_31	Predicted ORF;Prophage|Prophage_33770568 NC_005069 60 DNA adenine-methylase {Yersinia phage PY54}	-	-	-	-	-	-	-	-	-	-	-	-	Prophage_9630519	0.667	-	-	-	-	-	-	-	-	-	-	-	-	-	-	-	-	-	-
1864	ORF29_32	3006304	3006969	+	221	ORF29_32	Predicted ORF	-	-	-	-	-	-	-	-	-	-	-	-	-	-	-	-	-	-	-	-	-	-	-	-	-	-	-	-	-	-	-	-
1865	ORF29_33	3006950	3008053	+	367	ORF29_33	Predicted ORF	-	-	-	-	-	-	-	-	-	-	-	-	-	-	-	-	-	-	-	-	-	-	-	-	-	-	-	-	-	-	-	-
1866	ORF29_34	3008227	3008808	-	193	ORF29_34	Predicted ORF	-	-	-	-	-	-	-	-	-	-	-	-	-	-	-	-	-	-	-	-	-	-	-	-	-	-	-	-	-	-	-	-
1867	ORF29_35	3009243	3010085	+	280	ORF29_35	Predicted ORF	-	-	-	-	-	-	-	-	-	-	-	-	-	-	-	-	-	-	-	-	-	-	-	-	-	-	-	-	-	-	-	-
1868	ORF29_37	3010961	3011758	+	265	ORF29_37	Predicted ORF	-	-	-	-	-	-	-	-	-	-	-	-	-	-	-	-	-	-	-	-	-	-	-	-	-	-	-	-	-	-	-	-
1869	ORF29_39	3013074	3013268	-	64	ORF29_39	Predicted ORF	-	-	-	-	-	-	-	-	-	-	-	-	-	-	-	-	-	-	-	-	-	-	-	-	-	-	-	-	-	-	-	-
1870	ORF29_40	3013262	3013471	-	69	ORF29_40	Predicted ORF	-	-	-	-	-	-	-	-	-	-	-	-	-	-	-	-	-	-	-	-	-	-	-	-	-	-	-	-	-	-	-	-
1871	ORF29_42	3014585	3014800	-	71	ORF29_42	Predicted ORF	-	-	-	-	-	-	-	-	-	-	-	-	-	-	-	-	-	-	-	-	-	-	-	-	-	-	-	-	-	-	-	-
1872	ORF29_43	3014811	3015365	-	184	ORF29_43	Predicted ORF;Prophage|Prophage_23505484 NC_004313 hypothetical protein {Enterobacteria phage ST64B}	-	-	-	-	-	-	-	-	-	-	-	-	Prophage_19549023	0.489	-	-	-	-	-	-	-	-	-	-	-	-	-	-	-	-	-	-
1873	ORF29_44	3015394	3015636	-	80	ORF29_44	Predicted ORF	-	-	-	-	-	-	-	-	-	-	-	-	-	-	-	-	-	-	-	-	-	-	-	-	-	-	-	-	-	-	-	-
1874	ORF29_48	3018183	3018425	+	80	ORF29_48	Predicted ORF	-	-	-	-	-	-	-	-	-	-	-	-	-	-	-	-	-	-	-	-	-	-	-	-	-	-	-	-	-	-	-	-
1875	ORF29_50	3019584	3020165	-	193	ORF29_50	Predicted ORF	-	-	-	-	-	-	-	-	-	-	-	-	-	-	-	-	-	-	-	-	-	-	-	-	-	-	-	-	-	-	-	-
1876	ORF29_51	3020280	3020945	+	221	ORF29_51	Predicted ORF	-	-	-	-	-	-	-	-	-	-	-	-	-	-	-	-	-	-	-	-	-	-	-	-	-	-	-	-	-	-	-	-
1877	ORF29_52	3021536	3021856	-	106	ORF29_52	Predicted ORF;Prophage|Prophage_23505495 NC_004313 lysis protein (holin) {Enterobacteria phage ST64B}	-	-	-	-	-	-	-	-	-	-	-	-	Prophage_148727161	0.519	-	-	-	-	-	-	-	-	-	-	-	-	-	-	-	-	-	-
1878	ORF29_53	3022129	3022374	-	81	ORF29_53	Predicted ORF	-	-	-	-	-	-	-	-	-	-	-	-	-	-	-	-	-	-	-	-	-	-	-	-	-	-	-	-	-	-	-	-
1879	ORF29_54	3022390	3022536	-	48	ORF29_54	Predicted ORF	-	-	-	-	-	-	-	-	-	-	-	-	-	-	-	-	-	-	-	-	-	-	-	-	-	-	-	-	-	-	-	-
1880	ORF29_55	3022897	3023337	+	146	ORF29_55	Predicted ORF	-	-	-	-	-	-	-	-	-	-	-	-	-	-	-	-	-	-	-	-	-	-	-	-	-	-	-	-	-	-	-	-
1881	ORF29_56	3023374	3023505	-	43	ORF29_56	Predicted ORF	-	-	-	-	-	-	-	-	-	-	-	-	-	-	-	-	-	-	-	-	-	-	-	-	-	-	-	-	-	-	-	-
1882	ORF29_57	3023676	3024098	-	140	ORF29_57	Predicted ORF	-	-	-	-	-	-	-	-	-	-	-	-	-	-	-	-	-	-	-	-	-	-	-	-	-	-	-	-	-	-	-	-
1883	ORF29_58	3024579	3025445	-	288	ORF29_58	Predicted ORF	-	-	-	-	-	-	-	-	-	-	-	-	-	-	-	-	-	-	-	-	-	-	-	-	-	-	-	-	-	-	-	-
1884	ORF29_60	3027335	3027613	+	92	ORF29_60	Predicted ORF;IS|ISGpr2_PEP	-	-	-	-	-	-	-	-	-	-	-	-	-	-	-	-	-	-	-	-	-	-	-	-	-	-	ISEhe3_PEP	0.804	-	-	-	-
1885	ORF29_61	3027751	3028482	+	243	ORF29_61	Predicted ORF;IS|ISEhe3_PEP3	-	-	-	-	-	-	-	-	-	-	-	-	-	-	-	-	-	-	-	-	-	-	-	-	-	-	ISAbo1_PEP3	0.761	-	-	-	-
1886	ORF30_2	3029840	3031090	+	416	ORF30_2	Predicted ORF	-	-	-	-	-	-	-	-	-	-	-	-	-	-	-	-	-	-	-	-	-	-	-	-	-	-	-	-	-	-	-	-
1887	ORF30_3	3031087	3031839	+	250	ORF30_3	Predicted ORF	-	-	-	-	-	-	-	-	-	-	-	-	-	-	-	-	-	-	-	-	-	-	-	-	-	-	-	-	-	-	-	-
1888	ORF30_5	3033081	3033596	+	171	ORF30_5	Predicted ORF	-	-	-	-	-	-	-	-	-	-	-	-	-	-	-	-	-	-	-	-	-	-	-	-	-	-	-	-	-	-	-	-
1889	ORF30_6	3033580	3034149	+	189	ORF30_6	Predicted ORF	-	-	-	-	-	-	-	-	-	-	-	-	-	-	-	-	-	-	-	-	-	-	-	-	-	-	-	-	-	-	-	-
1890	ORF30_7	3034146	3034676	+	176	ORF30_7	Predicted ORF	-	-	-	-	-	-	-	-	-	-	-	-	-	-	-	-	-	-	-	-	-	-	-	-	-	-	-	-	-	-	-	-
1891	ORF30_8	3034871	3036229	-	452	ORF30_8	Predicted ORF	-	-	-	-	-	-	-	-	-	-	-	-	-	-	-	-	-	-	-	-	-	-	-	-	-	-	-	-	-	-	-	-
1892	ORF30_10	3037934	3039145	+	403	ORF30_10	Predicted ORF	-	-	-	-	-	-	-	-	-	-	-	-	-	-	-	-	-	-	-	-	-	-	-	-	-	-	-	-	-	-	-	-
1893	ORF30_11	3039247	3039636	-	129	ORF30_11	Predicted ORF	-	-	-	-	-	-	-	-	-	-	-	-	-	-	-	-	-	-	-	-	-	-	-	-	-	-	-	-	-	-	-	-
1894	ORF30_12	3039666	3039836	-	56	ORF30_12	Predicted ORF	-	-	-	-	-	-	-	-	-	-	-	-	-	-	-	-	-	-	-	-	-	-	-	-	-	-	-	-	-	-	-	-
1895	ORF30_13	3039961	3041130	+	389	ORF30_13	Predicted ORF	-	-	-	-	-	-	-	-	-	-	-	-	-	-	-	-	-	-	-	-	-	-	-	-	-	-	-	-	-	-	-	-
1896	ORF30_14	3041279	3041617	+	112	ORF30_14	Predicted ORF	-	-	-	-	-	-	-	-	-	-	-	-	-	-	-	-	-	-	-	-	-	-	-	-	-	-	-	-	-	-	-	-
1897	ORF30_16	3042485	3043093	-	202	ORF30_16	Predicted ORF	-	-	-	-	-	-	-	-	-	-	-	-	-	-	-	-	-	-	-	-	-	-	-	-	-	-	-	-	-	-	-	-
1898	ORF30_17	3043411	3044448	+	345	ORF30_17	Predicted ORF	-	-	-	-	-	-	-	-	-	-	-	-	-	-	-	-	-	-	-	-	-	-	-	-	-	-	-	-	-	-	-	-
1899	ORF30_18	3044623	3046182	-	519	ORF30_18	Predicted ORF	-	-	-	-	-	-	-	-	-	-	-	-	-	-	-	-	-	-	-	-	-	-	-	-	-	-	-	-	-	-	-	-
1900	ORF30_21	3049818	3050027	-	69	ORF30_21	Predicted ORF	-	-	-	-	-	-	-	-	-	-	-	-	-	-	-	-	-	-	-	-	-	-	-	-	-	-	-	-	-	-	-	-
1901	ORF30_22	3050493	3051365	-	290	ORF30_22	Predicted ORF	-	-	-	-	-	-	-	-	-	-	-	-	-	-	-	-	-	-	-	-	-	-	-	-	-	-	-	-	-	-	-	-
1902	ORF30_23	3051377	3053053	-	558	ORF30_23	Predicted ORF	-	-	-	-	-	-	-	-	-	-	-	-	-	-	-	-	-	-	-	-	-	-	-	-	-	-	-	-	-	-	-	-
1903	ORF30_24	3053731	3054660	-	309	ORF30_24	Predicted ORF	-	-	-	-	-	-	-	-	-	-	-	-	-	-	-	-	-	-	-	-	-	-	-	-	-	-	-	-	-	-	-	-
1904	ORF30_25	3055098	3055607	-	169	ORF30_25	Predicted ORF	-	-	-	-	-	-	-	-	-	-	-	-	-	-	-	-	-	-	-	-	-	-	-	-	-	-	-	-	-	-	-	-
1905	ORF30_26	3056129	3056641	-	170	ORF30_26	Predicted ORF	-	-	-	-	-	-	-	-	-	-	-	-	-	-	-	-	-	-	-	-	-	-	-	-	-	-	-	-	-	-	-	-
1906	ORF30_28	3057544	3058143	+	199	ORF30_28	Predicted ORF	-	-	-	-	-	-	-	-	-	-	-	-	-	-	-	-	-	-	-	-	-	-	-	-	-	-	-	-	-	-	-	-
1907	ORF30_29	3058140	3058499	+	119	ORF30_29	Predicted ORF	-	-	-	-	-	-	-	-	-	-	-	-	-	-	-	-	-	-	-	-	-	-	-	-	-	-	-	-	-	-	-	-
1908	ORF30_31	3059445	3059558	-	37	ORF30_31	Predicted ORF	-	-	-	-	-	-	-	-	-	-	-	-	-	-	-	-	-	-	-	-	-	-	-	-	-	-	-	-	-	-	-	-
1909	ORF30_32	3059595	3059975	-	126	ORF30_32	Predicted ORF	-	-	-	-	-	-	-	-	-	-	-	-	-	-	-	-	-	-	-	-	-	-	-	-	-	-	-	-	-	-	-	-
1910	ORF30_33	3060736	3061200	-	154	ORF30_33	Predicted ORF	-	-	-	-	-	-	-	-	-	-	-	-	-	-	-	-	-	-	-	-	-	-	-	-	-	-	-	-	-	-	-	-
1911	ORF30_34	3062256	3063161	-	301	ORF30_34	Predicted ORF	-	-	-	-	-	-	-	-	-	-	-	-	-	-	-	-	-	-	-	-	-	-	-	-	-	-	-	-	-	-	-	-
1912	ORF30_35	3063240	3064085	-	281	ORF30_35	Predicted ORF	-	-	-	-	-	-	-	-	-	-	-	-	-	-	-	-	-	-	-	-	-	-	-	-	-	-	-	-	-	-	-	-
1913	ORF30_36	3064394	3065404	-	336	ORF30_36	Predicted ORF;Prophage|Prophage_17313247 NC_003278 hypothetical protein {Pseudomonas phage phiCTX}	-	-	-	-	-	-	-	-	-	-	-	-	Prophage_126010876	0.446	-	-	-	-	-	-	-	-	-	-	-	-	-	-	-	-	-	-
1914	ORF30_43	3071599	3071847	-	82	ORF30_43	Predicted ORF	-	-	-	-	-	-	-	-	-	-	-	-	-	-	-	-	-	-	-	-	-	-	-	-	-	-	-	-	-	-	-	-
1915	ORF30_44	3071844	3072275	-	143	ORF30_44	Predicted ORF;Prophage|Prophage_9626269 NC_001416 orf-194 Putative fiber assembly protein {Enterobacteria phage lambda}	-	-	-	-	-	-	-	-	-	-	-	-	Prophage_148727172	0.427	-	-	-	-	-	-	-	-	-	-	-	-	-	-	-	-	-	-
1916	ORF30_48	3075461	3075793	-	110	ORF30_48	Predicted ORF;Prophage|Prophage_72537704 NC_007145 phage baseplate assembly protein {Burkholderia phage phi52237}	-	-	-	-	-	-	-	-	-	-	-	-	Prophage_126010861	0.436	-	-	-	-	-	-	-	-	-	-	-	-	-	-	-	-	-	-
1917	ORF30_52	3077470	3077859	-	129	ORF30_52	Predicted ORF	-	-	-	-	-	-	-	-	-	-	-	-	-	-	-	-	-	-	-	-	-	-	-	-	-	-	-	-	-	-	-	-
1918	ORF30_54	3078267	3079292	-	341	ORF30_54	Predicted ORF;Prophage|Prophage_34610166 NC_005091 capsid protein E {Burkholderia phage BcepNazgul}	-	-	-	-	-	-	-	-	-	-	-	-	Prophage_9630472	0.739	-	-	-	-	-	-	-	-	-	-	-	-	-	-	-	-	-	-
1919	ORF30_55	3079347	3079673	-	108	ORF30_55	Predicted ORF;Prophage|Prophage_9626250 NC_001416 D head-DNA stabilization protein {Enterobacteria phage lambda}	-	-	-	-	-	-	-	-	-	-	-	-	Prophage_9630471	0.537	-	-	-	-	-	-	-	-	-	-	-	-	-	-	-	-	-	-
1920	ORF30_56	3079683	3080990	-	435	ORF30_56	Predicted ORF;Prophage|Prophage_9626249 NC_001416 nu3 capsid assembly protein {Enterobacteria phage lambda}	-	-	-	-	-	-	-	-	-	-	-	-	Prophage_9626248	0.624	-	-	-	-	-	-	-	-	-	-	-	-	-	-	-	-	-	-
1921	ORF30_57	3080980	3082572	-	530	ORF30_57	Predicted ORF;Prophage|Prophage_34610170 NC_005091 portal protein Lambda B {Burkholderia phage BcepNazgul}	-	-	-	-	-	-	-	-	-	-	-	-	Prophage_9626247	0.728	-	-	-	-	-	-	-	-	-	-	-	-	-	-	-	-	-	-
1922	ORF30_58	3082569	3082772	-	67	ORF30_58	Predicted ORF;Prophage|Prophage_34610171 NC_005091 head-tail joining protein Lambda W {Burkholderia phage BcepNazgul}	-	-	-	-	-	-	-	-	-	-	-	-	Prophage_9630467	0.735	-	-	-	-	-	-	-	-	-	-	-	-	-	-	-	-	-	-
1923	ORF30_59	3082777	3084705	-	642	ORF30_59	Predicted ORF;Prophage|Prophage_148912767 NC_007805 Putative large subunit (GpA homolog) of DNA packaging dimer {Pseudomonas phage F10}	-	-	-	-	-	-	-	-	-	-	-	-	Prophage_9630466	0.777	-	-	-	-	-	-	-	-	-	-	-	-	-	-	-	-	-	-
1924	ORF30_60	3084677	3085186	-	169	ORF30_60	Predicted ORF;Prophage|Prophage_9626244 NC_001416 nu1 DNA packaging protein {Enterobacteria phage lambda}	-	-	-	-	-	-	-	-	-	-	-	-	Prophage_9630465	0.485	-	-	-	-	-	-	-	-	-	-	-	-	-	-	-	-	-	-
1925	ORF30_61	3085555	3085962	-	135	ORF30_61	Predicted ORF	-	-	-	-	-	-	-	-	-	-	-	-	-	-	-	-	-	-	-	-	-	-	-	-	-	-	-	-	-	-	-	-
1926	ORF30_62	3085955	3086218	-	87	ORF30_62	Predicted ORF	-	-	-	-	-	-	-	-	-	-	-	-	-	-	-	-	-	-	-	-	-	-	-	-	-	-	-	-	-	-	-	-
1927	ORF30_65	3087919	3088464	-	181	ORF30_65	Predicted ORF;Prophage|Prophage_19549031 NC_003444 unknown {Enterobacteria phage SfV}	-	-	-	-	-	-	-	-	-	-	-	-	Prophage_46358692	0.724	-	-	-	-	-	-	-	-	-	-	-	-	-	-	-	-	-	-
1928	ORF30_66	3088643	3088906	-	87	ORF30_66	Predicted ORF	-	-	-	-	-	-	-	-	-	-	-	-	-	-	-	-	-	-	-	-	-	-	-	-	-	-	-	-	-	-	-	-
1929	ORF30_67	3089386	3089799	-	137	ORF30_67	Predicted ORF;Prophage|Prophage_33620489 NC_005066 hypothetical protein {Enterobacteria phage RB49}	-	-	-	-	-	-	-	-	-	-	-	-	Prophage_157311403	0.489	-	-	-	-	-	-	-	-	-	-	-	-	-	-	PAI_CAI77378	0.577	-	-
1930	ORF30_68	3089799	3090119	-	106	ORF30_68	Predicted ORF;Prophage|Prophage_23505495 NC_004313 lysis protein (holin) {Enterobacteria phage ST64B}	-	-	-	-	-	-	-	-	-	-	-	-	Prophage_148727161	0.509	-	-	-	-	-	-	-	-	-	-	-	-	-	-	-	-	-	-
1931	ORF30_69	3090241	3091278	-	345	ORF30_69	Predicted ORF;Prophage|Prophage_18249888 NC_003356 putative DNA methylase {Enterobacteria phage phiP27}	-	-	-	-	-	-	-	-	-	-	-	-	Prophage_46402138	0.67	-	-	-	-	-	-	-	-	-	-	-	-	-	-	-	-	-	-
1932	ORF30_70	3091455	3091661	-	68	ORF30_70	Predicted ORF	-	-	-	-	-	-	-	-	-	-	-	-	-	-	-	-	-	-	-	-	-	-	-	-	-	-	-	-	-	-	-	-
1933	ORF30_71	3091835	3092341	-	168	ORF30_71	Predicted ORF;Prophage|Prophage_9633603 NC_000935 P5 {Acyrthosiphon pisum secondary endosymbiont phage 1}	-	-	-	-	-	-	-	-	-	-	-	-	Prophage_41057332	0.619	-	-	-	-	-	-	-	-	-	-	-	-	-	-	-	-	-	-
1934	ORF30_72	3092346	3092801	-	151	ORF30_72	Predicted ORF	-	-	-	-	-	-	-	-	-	-	-	-	-	-	-	-	-	-	-	-	-	-	-	-	-	-	-	-	-	-	-	-
1935	ORF30_73	3092803	3093000	-	65	ORF30_73	Predicted ORF	-	-	-	-	-	-	-	-	-	-	-	-	-	-	-	-	-	-	-	-	-	-	-	-	-	-	-	-	-	-	-	-
1936	ORF30_74	3092997	3093269	-	90	ORF30_74	Predicted ORF	-	-	-	-	-	-	-	-	-	-	-	-	-	-	-	-	-	-	-	-	-	-	-	-	-	-	-	-	-	-	-	-
1937	ORF30_75	3093753	3093953	-	66	ORF30_75	Predicted ORF	-	-	-	-	-	-	-	-	-	-	-	-	-	-	-	-	-	-	-	-	-	-	-	-	-	-	-	-	-	-	-	-
1938	ORF30_78	3095556	3095852	-	98	ORF30_78	Predicted ORF;Prophage|Prophage_32171125 NC_004914 cII CII protein {Stx2 converting phage II}	-	-	-	-	-	-	-	-	-	-	-	-	Prophage_9634198	0.551	-	-	-	-	-	-	-	-	-	-	-	-	-	-	-	-	-	-
1939	ORF30_79	3095965	3096171	-	68	ORF30_79	Predicted ORF;Prophage|Prophage_13559844 NC_002730 cro cro {Enterobacteria phage HK620}	-	-	-	-	-	-	-	-	-	-	-	-	Prophage_9634197	0.632	-	-	-	-	-	-	-	-	-	-	-	-	-	-	-	-	-	-
1940	ORF30_80	3096274	3096990	+	238	ORF30_80	Predicted ORF;Prophage|Prophage_13559843 NC_002730 cI repressor protein cI {Enterobacteria phage HK620}	-	-	-	-	-	-	-	-	-	-	-	-	Prophage_9626292	0.6	-	-	-	-	-	-	-	-	-	-	-	-	-	-	-	-	-	-
1941	ORF30_81	3097439	3097687	+	82	ORF30_81	Predicted ORF	-	-	-	-	-	-	-	-	-	-	-	-	-	-	-	-	-	-	-	-	-	-	-	-	-	-	-	-	-	-	-	-
1942	ORF30_82	3097735	3097869	+	44	ORF30_82	Predicted ORF	-	-	-	-	-	-	-	-	-	-	-	-	-	-	-	-	-	-	-	-	-	-	-	-	-	-	-	-	-	-	-	-
1943	ORF30_83	3097894	3098037	+	47	ORF30_83	Predicted ORF	-	-	-	-	-	-	-	-	-	-	-	-	-	-	-	-	-	-	-	-	-	-	-	-	-	-	-	-	-	-	-	-
1944	ORF30_84	3098055	3098321	+	88	ORF30_84	Predicted ORF	-	-	-	-	-	-	-	-	-	-	-	-	-	-	-	-	-	-	-	-	-	-	-	-	-	-	-	-	-	-	-	-
1945	ORF30_87	3101276	3101500	+	74	ORF30_87	Predicted ORF;Prophage|Prophage_9626274 NC_001416 xis Excisionase {Enterobacteria phage lambda}	-	-	-	-	-	-	-	-	-	-	-	-	Prophage_9634185	0.487	-	-	-	-	-	-	-	-	-	-	-	-	-	-	-	-	-	-
1946	ORF30_88	3101469	3102497	+	342	ORF30_88	Predicted ORF;Prophage|Prophage_9626273 NC_001416 int integration protein {Enterobacteria phage lambda}	-	-	-	-	-	-	-	-	-	-	-	-	Prophage_9634144	0.43	-	-	-	-	-	-	-	-	-	-	-	-	-	-	-	-	-	-
1947	ORF30_89	3102637	3103008	+	123	ORF30_89	Predicted ORF	-	-	-	-	-	-	-	-	-	-	-	-	-	-	-	-	-	-	-	-	-	-	-	-	-	-	-	-	-	-	-	-
1948	ORF30_90	3103114	3103674	+	186	ORF30_90	Predicted ORF	-	-	-	-	-	-	-	-	-	-	-	-	-	-	-	-	-	-	-	-	-	-	-	-	-	-	-	-	-	-	-	-
1949	ORF30_91	3103839	3104471	-	210	ORF30_91	Predicted ORF	-	-	-	-	-	-	-	-	-	-	-	-	-	-	-	-	-	-	-	-	-	-	-	-	-	-	-	-	-	-	-	-
1950	ORF30_92	3104822	3105526	-	234	ORF30_92	Predicted ORF	-	-	-	-	-	-	-	-	-	-	-	-	-	-	-	-	-	-	-	-	-	-	-	-	-	-	-	-	-	-	-	-
1951	ORF30_95	3108917	3109567	-	216	ORF30_95	Predicted ORF	-	-	-	-	-	-	-	-	-	-	-	-	-	-	-	-	-	-	-	-	-	-	-	-	-	-	-	-	-	-	-	-
1952	ORF30_97	3110152	3110331	-	59	ORF30_97	Predicted ORF	-	-	-	-	-	-	-	-	-	-	-	-	-	-	-	-	-	-	-	-	-	-	-	-	-	-	-	-	-	-	-	-
1953	ORF30_98	3111146	3111715	+	189	ORF30_98	Predicted ORF	-	-	-	-	-	-	-	-	-	-	-	-	-	-	-	-	-	-	-	-	-	-	-	-	-	-	-	-	-	-	-	-
1954	ORF30_99	3111896	3113164	-	422	ORF30_99	Predicted ORF	-	-	-	-	-	-	-	-	-	-	-	-	-	-	-	-	-	-	-	-	-	-	-	-	-	-	-	-	-	-	-	-
1955	ORF31_1	3113699	3114595	+	298	ORF31_1	Predicted ORF	-	-	-	-	-	-	-	-	-	-	-	-	-	-	-	-	-	-	-	-	-	-	-	-	-	-	-	-	-	-	-	-
1956	ORF31_2	3115857	3116027	-	56	ORF31_2	Predicted ORF	-	-	-	-	-	-	-	-	-	-	-	-	-	-	-	-	-	-	-	-	-	-	-	-	-	-	-	-	-	-	-	-
1957	ORF32_2	3117477	3118667	+	396	ORF32_2	Predicted ORF	-	-	-	-	-	-	-	-	-	-	-	-	-	-	-	-	-	-	-	-	-	-	-	-	-	-	-	-	-	-	-	-
1958	ORF32_3	3118728	3119822	+	364	ORF32_3	Predicted ORF	-	-	-	-	-	-	-	-	-	-	-	-	-	-	-	-	-	-	-	-	-	-	-	-	-	-	-	-	-	-	-	-
1959	ORF32_5	3123082	3123873	+	263	ORF32_5	Predicted ORF	-	-	-	-	-	-	-	-	-	-	-	-	-	-	-	-	-	-	-	-	-	-	-	-	-	-	-	-	-	-	-	-
1960	ORF32_6	3124195	3124959	-	254	ORF32_6	Predicted ORF	-	-	-	-	-	-	-	-	-	-	-	-	-	-	-	-	-	-	-	-	-	-	-	-	-	-	-	-	-	-	-	-
1961	ORF32_8	3127842	3128027	+	61	ORF32_8	Predicted ORF;IS|ISGpr2_PEP	-	-	-	-	-	-	-	-	-	-	-	-	-	-	-	-	-	-	-	-	-	-	-	-	-	-	ISEhe3_PEP	0.688	-	-	-	-
1962	ORF33_1	3131716	3132645	+	309	ORF33_1	Predicted ORF	-	-	-	-	-	-	-	-	-	-	-	-	-	-	-	-	-	-	-	-	-	-	-	-	-	-	-	-	-	-	-	-
1963	ORF33_2	3132760	3134076	-	438	ORF33_2	Predicted ORF	-	-	-	-	-	-	-	-	-	-	-	-	-	-	-	-	-	-	-	-	-	-	-	-	-	-	-	-	-	-	-	-
1964	ORF33_3	3134279	3137971	+	1230	ORF33_3	Predicted ORF	-	-	-	-	-	-	-	-	-	-	-	-	-	-	-	-	-	-	-	-	-	-	-	-	-	-	-	-	-	-	-	-
1965	ORF33_4	3138067	3139419	-	450	ORF33_4	Predicted ORF	-	-	-	-	-	-	-	-	-	-	-	-	-	-	-	-	-	-	-	-	-	-	-	-	-	-	-	-	-	-	-	-
1966	ORF33_5	3139898	3141028	+	376	ORF33_5	Predicted ORF	-	-	-	-	-	-	-	-	-	-	-	-	-	-	-	-	-	-	-	-	-	-	-	-	-	-	-	-	-	-	-	-
1967	ORF33_7	3144243	3144803	+	186	ORF33_7	Predicted ORF;Prophage|Prophage_62362261 NC_006949 48 putative bacterial type single strand DNA binding protein (ssb) {Enterobacteria phage ES18}	VFG0576	0.595	-	-	-	-	-	-	-	-	-	-	Prophage_46401640	0.571	-	-	-	-	-	-	-	-	-	-	-	-	-	-	-	-	-	-
1968	ORF34_2	3147042	3148325	+	427	ORF34_2	Predicted ORF	-	-	-	-	-	-	-	-	-	-	-	-	-	-	-	-	-	-	-	-	-	-	-	-	-	-	-	-	-	-	-	-
1969	ORF34_5	3150703	3151347	+	214	ORF34_5	Predicted ORF	-	-	-	-	-	-	-	-	-	-	-	-	-	-	-	-	-	-	-	-	-	-	-	-	-	-	-	-	-	-	-	-
1970	ORF34_6	3151404	3151508	+	34	ORF34_6	Predicted ORF	-	-	-	-	-	-	-	-	-	-	-	-	-	-	-	-	-	-	-	-	-	-	-	-	-	-	-	-	-	-	-	-
1971	ORF34_7	3151826	3152851	+	341	ORF34_7	Predicted ORF	-	-	-	-	-	-	-	-	-	-	-	-	-	-	-	-	-	-	-	-	-	-	-	-	-	-	-	-	-	-	-	-
1972	ORF34_8	3152937	3156050	-	1037	ORF34_8	Predicted ORF;AR|AR_ABG77966 AcrB	-	-	AR_CAC35725	0.685	-	-	-	-	-	-	-	-	-	-	-	-	-	-	-	-	-	-	-	-	-	-	-	-	-	-	-	-
1973	ORF34_9	3156050	3157264	-	404	ORF34_9	Predicted ORF;AR|AR_YP_001334126 acridine efflux pump	-	-	AR_ZP_03281411	0.532	-	-	-	-	-	-	-	-	-	-	-	-	-	-	-	-	-	-	-	-	-	-	-	-	-	-	-	-
1974	ORF34_11	3158431	3159909	-	492	ORF34_11	Predicted ORF	-	-	-	-	-	-	-	-	-	-	-	-	-	-	-	-	-	-	-	-	-	-	-	-	-	-	-	-	-	-	-	-
1975	ORF34_12	3160616	3162361	+	581	ORF34_12	Predicted ORF	-	-	-	-	-	-	-	-	-	-	-	-	-	-	-	-	-	-	-	-	-	-	-	-	-	-	-	-	-	-	-	-
1976	ORF34_21	3174654	3176243	+	529	ORF34_21	Predicted ORF	-	-	-	-	-	-	-	-	-	-	-	-	-	-	-	-	-	-	-	-	-	-	-	-	-	-	-	-	-	-	-	-
1977	ORF34_22	3176310	3176777	-	155	ORF34_22	Predicted ORF	-	-	-	-	-	-	-	-	-	-	-	-	-	-	-	-	-	-	-	-	-	-	-	-	-	-	-	-	-	-	-	-
1978	ORF34_24	3178020	3178628	-	202	ORF34_24	Predicted ORF	-	-	-	-	-	-	-	-	-	-	-	-	-	-	-	-	-	-	-	-	-	-	-	-	-	-	-	-	-	-	-	-
1979	ORF34_25	3178663	3179688	-	341	ORF34_25	Predicted ORF	-	-	-	-	-	-	-	-	-	-	-	-	-	-	-	-	-	-	-	-	-	-	-	-	-	-	-	-	-	-	-	-
1980	ORF34_26	3179759	3180409	-	216	ORF34_26	Predicted ORF	-	-	-	-	-	-	-	-	-	-	-	-	-	-	-	-	-	-	-	-	-	-	-	-	-	-	-	-	-	-	-	-
1981	ORF34_28	3181402	3183813	-	803	ORF34_28	Predicted ORF	-	-	-	-	-	-	-	-	-	-	-	-	-	-	-	-	-	-	-	-	-	-	-	-	-	-	-	-	-	-	-	-
1982	ORF34_29	3183862	3184449	-	195	ORF34_29	Predicted ORF	-	-	-	-	-	-	-	-	-	-	-	-	-	-	-	-	-	-	-	-	-	-	-	-	-	-	-	-	-	-	-	-
1983	ORF34_30	3184917	3186821	+	634	ORF34_30	Predicted ORF	-	-	-	-	-	-	-	-	-	-	-	-	-	-	-	-	-	-	-	-	-	-	-	-	-	-	-	-	-	-	-	-
1984	ORF34_31	3187048	3187596	+	182	ORF34_31	Predicted ORF	-	-	-	-	-	-	-	-	-	-	-	-	-	-	-	-	-	-	-	-	-	-	-	-	-	-	-	-	-	-	-	-
1985	ORF34_32	3187695	3189503	+	602	ORF34_32	Predicted ORF	-	-	-	-	-	-	-	-	-	-	-	-	-	-	-	-	-	-	-	-	-	-	-	-	-	-	-	-	-	-	-	-
1986	ORF34_33	3189503	3189937	+	144	ORF34_33	Predicted ORF	-	-	-	-	-	-	-	-	-	-	-	-	-	-	-	-	-	-	-	-	-	-	-	-	-	-	-	-	-	-	-	-
1987	ORF34_37	3194409	3194843	-	144	ORF34_37	Predicted ORF	-	-	-	-	-	-	-	-	-	-	-	-	-	-	-	-	-	-	-	-	-	-	-	-	-	-	-	-	-	-	-	-
1988	ORF34_38	3194922	3195257	-	111	ORF34_38	Predicted ORF	-	-	-	-	-	-	-	-	-	-	-	-	-	-	-	-	-	-	-	-	-	-	-	-	-	-	-	-	-	-	-	-
1989	ORF34_43	3199679	3200089	-	136	ORF34_43	Predicted ORF	-	-	-	-	-	-	-	-	-	-	-	-	-	-	-	-	-	-	-	-	-	-	-	-	-	-	-	-	-	-	-	-
1990	ORF34_44	3200337	3203054	-	905	ORF34_44	Predicted ORF	-	-	-	-	-	-	-	-	-	-	-	-	-	-	-	-	-	-	-	-	-	-	-	-	-	-	-	-	-	-	-	-
1991	ORF34_45	3203059	3204309	-	416	ORF34_45	Predicted ORF	-	-	-	-	-	-	-	-	-	-	-	-	-	-	-	-	-	-	-	-	-	-	-	-	-	-	-	-	-	-	-	-
1992	ORF34_48	3206529	3208046	+	505	ORF34_48	Predicted ORF	-	-	-	-	-	-	-	-	-	-	-	-	-	-	-	-	-	-	-	-	-	-	-	-	-	-	-	-	-	-	-	-
1993	ORF34_50	3209253	3210572	+	439	ORF34_50	Predicted ORF	-	-	-	-	-	-	-	-	-	-	-	-	-	-	-	-	-	-	-	-	-	-	-	-	-	-	-	-	-	-	-	-
1994	ORF34_52	3211994	3213007	+	337	ORF34_52	Predicted ORF	-	-	-	-	-	-	-	-	-	-	-	-	-	-	-	-	-	-	-	-	-	-	-	-	-	-	-	-	-	-	-	-
1995	ORF34_55	3215685	3216905	+	406	ORF34_55	Predicted ORF	-	-	-	-	-	-	-	-	-	-	-	-	-	-	-	-	-	-	-	-	-	-	-	-	-	-	-	-	-	-	-	-
1996	ORF34_56	3217558	3217677	+	39	ORF34_56	Predicted ORF	-	-	-	-	-	-	-	-	-	-	-	-	-	-	-	-	-	-	-	-	-	-	-	-	-	-	-	-	-	-	-	-
[truncated: 87 more rows]

## Sheet: Sheet18
VRprofile
job_id : pXobOmcOY alignment program: blastp
data format:annot_pro_up
Reference (Query) Genome ID : upload_ref_cds
Subject dataset : VF, AR, T3SE, T4SE, T6SE, T7SE, Prophage, ICE, T3SS, T4SS, T6SS, T7SS, Integron, IS, PAI, ARI
Dowload
Compressed file (.gz) containing alignment summary Excel file
Ha-values for the genes in the subject genome against the query databases
No	Synonym	Start	End	Strand	Length(aa)	Gene	Product	VF	AR	T3SE	T4SE	T6SE	T7SE	Prophage	ICE	T3SS	T4SS	T6SS	T7SS	Integron	IS	PAI	ARI
Hit	Ha-value	Hit	Ha-value	Hit	Ha-value	Hit	Ha-value	Hit	Ha-value	Hit	Ha-value	Hit	Ha-value	Hit	Ha-value	Hit	Ha-value	Hit	Ha-value	Hit	Ha-value	Hit	Ha-value	Hit	Ha-value	Hit	Ha-value	Hit	Ha-value	Hit	Ha-value
2292	ORF67_39	3701796	3702473	-	225	ORF67_39	Predicted ORF	-	-	-	-	-	-	-	-	-	-	-	-	-	-	-	-	-	-	-	-	-	-	-	-	-	-	-	-	-	-	-	-
2293	ORF67_45	3707789	3708364	-	191	ORF67_45	Predicted ORF;VF|VFG1392 (gi:15608361) sigE - sigE	VFG0121	0.655	-	-	-	-	-	-	-	-	-	-	-	-	-	-	-	-	-	-	-	-	-	-	-	-	-	-	-	-	-	-
2294	ORF67_46	3708609	3710267	+	552	ORF67_46	Predicted ORF	-	-	-	-	-	-	-	-	-	-	-	-	-	-	-	-	-	-	-	-	-	-	-	-	-	-	-	-	-	-	-	-
2295	ORF67_47	3710456	3710992	-	178	ORF67_47	Predicted ORF	-	-	-	-	-	-	-	-	-	-	-	-	-	-	-	-	-	-	-	-	-	-	-	-	-	-	-	-	-	-	-	-
2296	ORF67_48	3710973	3711242	-	89	ORF67_48	Predicted ORF	-	-	-	-	-	-	-	-	-	-	-	-	-	-	-	-	-	-	-	-	-	-	-	-	-	-	-	-	-	-	-	-
2297	ORF67_49	3711518	3712510	+	330	ORF67_49	Predicted ORF	-	-	-	-	-	-	-	-	-	-	-	-	-	-	-	-	-	-	-	-	-	-	-	-	-	-	-	-	-	-	-	-
2298	ORF67_51	3715727	3716380	-	217	ORF67_51	Predicted ORF;VF|DBETH_P54176|HLY3_BACCE Hemolysin-3 OS=Bacillus cereus PE=3 SV=1	DBETH_C6YLY8	0.622	-	-	-	-	-	-	-	-	-	-	-	-	-	-	-	-	-	-	-	-	-	-	-	-	-	-	-	-	-	-
2299	ORF67_52	3716690	3717202	-	170	ORF67_52	Predicted ORF	-	-	-	-	-	-	-	-	-	-	-	-	-	-	-	-	-	-	-	-	-	-	-	-	-	-	-	-	-	-	-	-
2300	ORF67_54	3718879	3720231	-	450	ORF67_54	Predicted ORF	-	-	-	-	-	-	-	-	-	-	-	-	-	-	-	-	-	-	-	-	-	-	-	-	-	-	-	-	-	-	-	-
2301	ORF67_55	3720808	3723732	-	974	ORF67_55	Predicted ORF	-	-	-	-	-	-	-	-	-	-	-	-	-	-	-	-	-	-	-	-	-	-	-	-	-	-	-	-	-	-	-	-
2302	ORF67_56	3723943	3724359	-	138	ORF67_56	Predicted ORF	-	-	-	-	-	-	-	-	-	-	-	-	-	-	-	-	-	-	-	-	-	-	-	-	-	-	-	-	-	-	-	-
2303	ORF67_57	3724416	3725513	-	365	ORF67_57	Predicted ORF	-	-	-	-	-	-	-	-	-	-	-	-	-	-	-	-	-	-	-	-	-	-	-	-	-	-	-	-	-	-	-	-
2304	ORF67_58	3725940	3727145	-	401	ORF67_58	Predicted ORF	-	-	-	-	-	-	-	-	-	-	-	-	-	-	-	-	-	-	-	-	-	-	-	-	-	-	-	-	-	-	-	-
2305	ORF67_61	3729898	3730467	-	189	ORF67_61	Predicted ORF	-	-	-	-	-	-	-	-	-	-	-	-	-	-	-	-	-	-	-	-	-	-	-	-	-	-	-	-	-	-	-	-
2306	ORF67_62	3730677	3731012	+	111	ORF67_62	Predicted ORF	-	-	-	-	-	-	-	-	-	-	-	-	-	-	-	-	-	-	-	-	-	-	-	-	-	-	-	-	-	-	-	-
2307	ORF67_63	3731603	3732283	+	226	ORF67_63	Predicted ORF	-	-	-	-	-	-	-	-	-	-	-	-	-	-	-	-	-	-	-	-	-	-	-	-	-	-	-	-	-	-	-	-
2308	ORF67_66	3736748	3737449	-	233	ORF67_66	Predicted ORF	-	-	-	-	-	-	-	-	-	-	-	-	-	-	-	-	-	-	-	-	-	-	-	-	-	-	-	-	-	-	-	-
2309	ORF67_68	3739287	3739946	-	219	ORF67_68	Predicted ORF	-	-	-	-	-	-	-	-	-	-	-	-	-	-	-	-	-	-	-	-	-	-	-	-	-	-	-	-	-	-	-	-
2310	ORF67_69	3740176	3740892	-	238	ORF67_69	Predicted ORF	-	-	-	-	-	-	-	-	-	-	-	-	-	-	-	-	-	-	-	-	-	-	-	-	-	-	-	-	-	-	-	-
2311	ORF67_70	3741531	3742409	-	292	ORF67_70	Predicted ORF	-	-	-	-	-	-	-	-	-	-	-	-	-	-	-	-	-	-	-	-	-	-	-	-	-	-	-	-	-	-	-	-
2312	ORF67_71	3742679	3743755	-	358	ORF67_71	Predicted ORF;PAI|PAI_AAO17213 Orf59	-	-	-	-	-	-	-	-	-	-	-	-	-	-	-	-	-	-	-	-	-	-	-	-	-	-	-	-	PAI_AAO17213	0.846	-	-
2313	ORF67_72	3744081	3745244	-	387	ORF67_72	Predicted ORF;PAI|PAI_AAO17214 Pgk	-	-	-	-	-	-	-	-	-	-	-	-	-	-	-	-	-	-	-	-	-	-	-	-	-	-	-	-	PAI_AAO17214	0.788	-	-
2314	ORF67_73	3745349	3746362	-	337	ORF67_73	Predicted ORF;PAI|PAI_AAO17215 Epd	-	-	-	-	-	-	-	-	-	-	-	-	-	-	-	-	-	-	-	-	-	-	-	-	-	-	-	-	PAI_AAO17215	0.706	-	-
2315	ORF67_74	3746684	3748681	-	665	ORF67_74	Predicted ORF;PAI|PAI_AAW49307 putative ferredoxin transketolase	-	-	-	-	-	-	-	-	-	-	-	-	-	-	-	-	-	-	-	-	-	-	-	-	-	-	-	-	PAI_AAO17218	0.795	-	-
2316	ORF67_75	3748939	3749385	-	148	ORF67_75	Predicted ORF	-	-	-	-	-	-	-	-	-	-	-	-	-	-	-	-	-	-	-	-	-	-	-	-	-	-	-	-	-	-	-	-
2317	ORF67_76	3749449	3750282	-	277	ORF67_76	Predicted ORF	-	-	-	-	-	-	-	-	-	-	-	-	-	-	-	-	-	-	-	-	-	-	-	-	-	-	-	-	-	-	-	-
2318	ORF67_77	3750282	3750605	-	107	ORF67_77	Predicted ORF	-	-	-	-	-	-	-	-	-	-	-	-	-	-	-	-	-	-	-	-	-	-	-	-	-	-	-	-	-	-	-	-
2319	ORF67_78	3750714	3751751	+	345	ORF67_78	Predicted ORF	-	-	-	-	-	-	-	-	-	-	-	-	-	-	-	-	-	-	-	-	-	-	-	-	-	-	-	-	-	-	-	-
2320	ORF67_79	3751933	3752166	-	77	ORF67_79	Predicted ORF	-	-	-	-	-	-	-	-	-	-	-	-	-	-	-	-	-	-	-	-	-	-	-	-	-	-	-	-	-	-	-	-
2321	ORF67_80	3753746	3754030	+	94	ORF67_80	Predicted ORF	-	-	-	-	-	-	-	-	-	-	-	-	-	-	-	-	-	-	-	-	-	-	-	-	-	-	-	-	-	-	-	-
2322	ORF67_81	3754137	3754703	-	188	ORF67_81	Predicted ORF	-	-	-	-	-	-	-	-	-	-	-	-	-	-	-	-	-	-	-	-	-	-	-	-	-	-	-	-	-	-	-	-
2323	ORF67_83	3755747	3758089	+	780	ORF67_83	Predicted ORF	-	-	-	-	-	-	-	-	-	-	-	-	-	-	-	-	-	-	-	-	-	-	-	-	-	-	-	-	-	-	-	-
2324	ORF67_84	3758141	3759688	+	515	ORF67_84	Predicted ORF	-	-	-	-	-	-	-	-	-	-	-	-	-	-	-	-	-	-	-	-	-	-	-	-	-	-	-	-	-	-	-	-
2325	ORF67_86	3761387	3761545	-	52	ORF67_86	Predicted ORF	-	-	-	-	-	-	-	-	-	-	-	-	-	-	-	-	-	-	-	-	-	-	-	-	-	-	-	-	-	-	-	-
2326	ORF67_87	3761650	3762444	+	264	ORF67_87	Predicted ORF	-	-	-	-	-	-	-	-	-	-	-	-	-	-	-	-	-	-	-	-	-	-	-	-	-	-	-	-	-	-	-	-
2327	ORF67_88	3762522	3763643	-	373	ORF67_88	Predicted ORF	-	-	-	-	-	-	-	-	-	-	-	-	-	-	-	-	-	-	-	-	-	-	-	-	-	-	-	-	-	-	-	-
2328	ORF67_89	3763636	3764022	-	128	ORF67_89	Predicted ORF	-	-	-	-	-	-	-	-	-	-	-	-	-	-	-	-	-	-	-	-	-	-	-	-	-	-	-	-	-	-	-	-
2329	ORF67_92	3766616	3767056	+	146	ORF67_92	Predicted ORF	-	-	-	-	-	-	-	-	-	-	-	-	-	-	-	-	-	-	-	-	-	-	-	-	-	-	-	-	-	-	-	-
2330	ORF67_93	3767197	3767394	-	65	ORF67_93	Predicted ORF	-	-	-	-	-	-	-	-	-	-	-	-	-	-	-	-	-	-	-	-	-	-	-	-	-	-	-	-	-	-	-	-
2331	ORF67_94	3767590	3768414	-	274	ORF67_94	Predicted ORF	-	-	-	-	-	-	-	-	-	-	-	-	-	-	-	-	-	-	-	-	-	-	-	-	-	-	-	-	-	-	-	-
2332	ORF67_95	3768472	3769629	-	385	ORF67_95	Predicted ORF	-	-	-	-	-	-	-	-	-	-	-	-	-	-	-	-	-	-	-	-	-	-	-	-	-	-	-	-	-	-	-	-
2333	ORF67_96	3770686	3771417	+	243	ORF67_96	Predicted ORF	-	-	-	-	-	-	-	-	-	-	-	-	-	-	-	-	-	-	-	-	-	-	-	-	-	-	-	-	-	-	-	-
2334	ORF67_97	3771429	3771890	+	153	ORF67_97	Predicted ORF	-	-	-	-	-	-	-	-	-	-	-	-	-	-	-	-	-	-	-	-	-	-	-	-	-	-	-	-	-	-	-	-
2335	ORF67_98	3771908	3773020	+	370	ORF67_98	Predicted ORF	-	-	-	-	-	-	-	-	-	-	-	-	-	-	-	-	-	-	-	-	-	-	-	-	-	-	-	-	-	-	-	-
2336	ORF67_99	3773409	3773741	+	110	ORF67_99	Predicted ORF	-	-	-	-	-	-	-	-	-	-	-	-	-	-	-	-	-	-	-	-	-	-	-	-	-	-	-	-	-	-	-	-
2337	ORF67_100	3774023	3775357	+	444	ORF67_100	Predicted ORF	-	-	-	-	-	-	-	-	-	-	-	-	-	-	-	-	-	-	-	-	-	-	-	-	-	-	-	-	-	-	-	-
2338	ORF67_103	3781517	3784426	-	969	ORF67_103	Predicted ORF	-	-	-	-	-	-	-	-	-	-	-	-	-	-	-	-	-	-	-	-	-	-	-	-	-	-	-	-	-	-	-	-
2339	ORF67_104	3784456	3787920	-	1154	ORF67_104	Predicted ORF	-	-	-	-	-	-	-	-	-	-	-	-	-	-	-	-	-	-	-	-	-	-	-	-	-	-	-	-	-	-	-	-
2340	ORF67_105	3788285	3789259	-	324	ORF67_105	Predicted ORF	-	-	-	-	-	-	-	-	-	-	-	-	-	-	-	-	-	-	-	-	-	-	-	-	-	-	-	-	-	-	-	-
2341	ORF67_106	3789259	3790362	-	367	ORF67_106	Predicted ORF	-	-	-	-	-	-	-	-	-	-	-	-	-	-	-	-	-	-	-	-	-	-	-	-	-	-	-	-	-	-	-	-
2342	ORF67_108	3792122	3793117	-	331	ORF67_108	Predicted ORF	-	-	-	-	-	-	-	-	-	-	-	-	-	-	-	-	-	-	-	-	-	-	-	-	-	-	-	-	-	-	-	-
2343	ORF67_109	3793352	3793750	-	132	ORF67_109	Predicted ORF	-	-	-	-	-	-	-	-	-	-	-	-	-	-	-	-	-	-	-	-	-	-	-	-	-	-	-	-	-	-	-	-
2344	ORF67_110	3793740	3794804	-	354	ORF67_110	Predicted ORF	-	-	-	-	-	-	-	-	-	-	-	-	-	-	-	-	-	-	-	-	-	-	-	-	-	-	-	-	-	-	-	-
2345	ORF67_111	3794801	3795619	-	272	ORF67_111	Predicted ORF	-	-	-	-	-	-	-	-	-	-	-	-	-	-	-	-	-	-	-	-	-	-	-	-	-	-	-	-	-	-	-	-
2346	ORF67_112	3795610	3796146	-	178	ORF67_112	Predicted ORF	-	-	-	-	-	-	-	-	-	-	-	-	-	-	-	-	-	-	-	-	-	-	-	-	-	-	-	-	-	-	-	-
2347	ORF67_114	3796650	3797492	-	280	ORF67_114	Predicted ORF	-	-	-	-	-	-	-	-	-	-	-	-	-	-	-	-	-	-	-	-	-	-	-	-	-	-	-	-	-	-	-	-
2348	ORF67_115	3797672	3798934	+	420	ORF67_115	Predicted ORF	-	-	-	-	-	-	-	-	-	-	-	-	-	-	-	-	-	-	-	-	-	-	-	-	-	-	-	-	-	-	-	-
2349	ORF67_117	3800339	3802258	-	639	ORF67_117	Predicted ORF	-	-	-	-	-	-	-	-	-	-	-	-	-	-	-	-	-	-	-	-	-	-	-	-	-	-	-	-	-	-	-	-
2350	ORF67_118	3802617	3803216	+	199	ORF67_118	Predicted ORF	-	-	-	-	-	-	-	-	-	-	-	-	-	-	-	-	-	-	-	-	-	-	-	-	-	-	-	-	-	-	-	-
2351	ORF67_119	3803365	3803955	-	196	ORF67_119	Predicted ORF	-	-	-	-	-	-	-	-	-	-	-	-	-	-	-	-	-	-	-	-	-	-	-	-	-	-	-	-	-	-	-	-
2352	ORF67_120	3804095	3804976	+	293	ORF67_120	Predicted ORF	-	-	-	-	-	-	-	-	-	-	-	-	-	-	-	-	-	-	-	-	-	-	-	-	-	-	-	-	-	-	-	-
2353	ORF67_121	3805113	3806774	+	553	ORF67_121	Predicted ORF	-	-	-	-	-	-	-	-	-	-	-	-	-	-	-	-	-	-	-	-	-	-	-	-	-	-	-	-	-	-	-	-
2354	ORF67_122	3806866	3807219	+	117	ORF67_122	Predicted ORF	-	-	-	-	-	-	-	-	-	-	-	-	-	-	-	-	-	-	-	-	-	-	-	-	-	-	-	-	-	-	-	-
2355	ORF67_123	3807428	3807718	-	96	ORF67_123	Predicted ORF	-	-	-	-	-	-	-	-	-	-	-	-	-	-	-	-	-	-	-	-	-	-	-	-	-	-	-	-	-	-	-	-
2356	ORF67_124	3807711	3808145	-	144	ORF67_124	Predicted ORF	-	-	-	-	-	-	-	-	-	-	-	-	-	-	-	-	-	-	-	-	-	-	-	-	-	-	-	-	-	-	-	-
2357	ORF67_125	3808292	3808777	+	161	ORF67_125	Predicted ORF	-	-	-	-	-	-	-	-	-	-	-	-	-	-	-	-	-	-	-	-	-	-	-	-	-	-	-	-	-	-	-	-
2358	ORF67_126	3809395	3810594	+	399	ORF67_126	Predicted ORF;PAI|PAI_AAD44730 Int	-	-	-	-	-	-	-	-	-	-	-	-	-	-	-	-	-	-	-	-	-	-	-	-	-	-	-	-	PAI_AAK20803	0.561	-	-
2359	ORF68_1	3810920	3811126	+	68	ORF68_1	Predicted ORF	-	-	-	-	-	-	-	-	-	-	-	-	-	-	-	-	-	-	-	-	-	-	-	-	-	-	-	-	-	-	-	-
2360	ORF69_1	3812445	3812732	-	95	ORF69_1	Predicted ORF	-	-	-	-	-	-	-	-	-	-	-	-	-	-	-	-	-	-	-	-	-	-	-	-	-	-	-	-	-	-	-	-
2361	ORF70_2	3813903	3815513	-	536	ORF70_2	Predicted ORF;Prophage|Prophage_32170864 NC_004913 hypothetical protein {Stx1 converting phage}	-	-	-	-	-	-	-	-	-	-	-	-	Prophage_116222017	0.479	-	-	-	-	-	-	-	-	-	-	-	-	-	-	-	-	-	-
2362	ORF70_3	3815561	3815893	-	110	ORF70_3	Predicted ORF	-	-	-	-	-	-	-	-	-	-	-	-	-	-	-	-	-	-	-	-	-	-	-	-	-	-	-	-	-	-	-	-
2363	ORF71_1	3816052	3816159	-	35	ORF71_1	Predicted ORF	-	-	-	-	-	-	-	-	-	-	-	-	-	-	-	-	-	-	-	-	-	-	-	-	-	-	-	-	-	-	-	-
2364	ORF72_1	3816220	3817062	+	280	ORF72_1	Predicted ORF;	-	-	CBMAR_Q545Z2	0.461	-	-	-	-	-	-	-	-	-	-	-	-	-	-	-	-	-	-	-	-	-	-	-	-	-	-	-	-
2365	ORF74_2	3819428	3820861	+	477	ORF74_2	Predicted ORF	-	-	-	-	-	-	-	-	-	-	-	-	-	-	-	-	-	-	-	-	-	-	-	-	-	-	-	-	-	-	-	-
2366	ORF75_1	3820864	3821289	+	141	ORF75_1	Predicted ORF	-	-	-	-	-	-	-	-	-	-	-	-	-	-	-	-	-	-	-	-	-	-	-	-	-	-	-	-	-	-	-	-
2367	ORF78_1	3823437	3825413	+	658	ORF78_1	Predicted ORF	-	-	-	-	-	-	-	-	-	-	-	-	-	-	-	-	-	-	-	-	-	-	-	-	-	-	-	-	-	-	-	-
2368	ORF78_2	3825406	3826461	+	351	ORF78_2	Predicted ORF	-	-	-	-	-	-	-	-	-	-	-	-	-	-	-	-	-	-	-	-	-	-	-	-	-	-	-	-	-	-	-	-
2369	ORF78_3	3826455	3827228	+	257	ORF78_3	Predicted ORF	-	-	-	-	-	-	-	-	-	-	-	-	-	-	-	-	-	-	-	-	-	-	-	-	-	-	-	-	-	-	-	-
2370	ORF78_4	3827216	3827440	+	74	ORF78_4	Predicted ORF	-	-	-	-	-	-	-	-	-	-	-	-	-	-	-	-	-	-	-	-	-	-	-	-	-	-	-	-	-	-	-	-
2371	ORF78_5	3827457	3828323	+	288	ORF78_5	Predicted ORF	-	-	-	-	-	-	-	-	-	-	-	-	-	-	-	-	-	-	-	-	-	-	-	-	-	-	-	-	-	-	-	-
2372	ORF78_6	3828320	3829453	+	377	ORF78_6	Predicted ORF	-	-	-	-	-	-	-	-	-	-	-	-	-	-	-	-	-	-	-	-	-	-	-	-	-	-	-	-	-	-	-	-
2373	ORF78_7	3829589	3830542	-	317	ORF78_7	Predicted ORF	-	-	-	-	-	-	-	-	-	-	-	-	-	-	-	-	-	-	-	-	-	-	-	-	-	-	-	-	-	-	-	-
2374	ORF78_9	3832211	3832486	+	91	ORF78_9	Predicted ORF	-	-	-	-	-	-	-	-	-	-	-	-	-	-	-	-	-	-	-	-	-	-	-	-	-	-	-	-	-	-	-	-
2375	ORF78_11	3833955	3834560	+	201	ORF78_11	Predicted ORF	-	-	-	-	-	-	-	-	-	-	-	-	-	-	-	-	-	-	-	-	-	-	-	-	-	-	-	-	-	-	-	-
2376	ORF78_12	3834557	3836188	+	543	ORF78_12	Predicted ORF	-	-	-	-	-	-	-	-	-	-	-	-	-	-	-	-	-	-	-	-	-	-	-	-	-	-	-	-	-	-	-	-
2377	ORF78_13	3836270	3836551	+	93	ORF78_13	Predicted ORF	-	-	-	-	-	-	-	-	-	-	-	-	-	-	-	-	-	-	-	-	-	-	-	-	-	-	-	-	-	-	-	-
2378	ORF78_14	3836555	3837151	+	198	ORF78_14	Predicted ORF	-	-	-	-	-	-	-	-	-	-	-	-	-	-	-	-	-	-	-	-	-	-	-	-	-	-	-	-	-	-	-	-
2379	ORF78_15	3837148	3837912	+	254	ORF78_15	Predicted ORF	-	-	-	-	-	-	-	-	-	-	-	-	-	-	-	-	-	-	-	-	-	-	-	-	-	-	-	-	-	-	-	-
2380	ORF78_16	3837887	3838096	+	69	ORF78_16	Predicted ORF	-	-	-	-	-	-	-	-	-	-	-	-	-	-	-	-	-	-	-	-	-	-	-	-	-	-	-	-	-	-	-	-
2381	ORF78_17	3838089	3838880	+	263	ORF78_17	Predicted ORF	-	-	-	-	-	-	-	-	-	-	-	-	-	-	-	-	-	-	-	-	-	-	-	-	-	-	-	-	-	-	-	-
2382	ORF78_18	3838904	3839920	+	338	ORF78_18	Predicted ORF	-	-	-	-	-	-	-	-	-	-	-	-	-	-	-	-	-	-	-	-	-	-	-	-	-	-	-	-	-	-	-	-
2383	ORF78_19	3840056	3841579	-	507	ORF78_19	Predicted ORF	-	-	-	-	-	-	-	-	-	-	-	-	-	-	-	-	-	-	-	-	-	-	-	-	-	-	-	-	-	-	-	-
2384	ORF78_20	3841592	3842878	-	428	ORF78_20	Predicted ORF	-	-	-	-	-	-	-	-	-	-	-	-	-	-	-	-	-	-	-	-	-	-	-	-	-	-	-	-	-	-	-	-
2385	ORF78_25	3847217	3848407	+	396	ORF78_25	Predicted ORF;VF|VFG1312 (gi:21281868) cap8P - capsular polysaccharide synthesis enzyme Cap8P	VFG1373	0.48	-	-	-	-	-	-	-	-	-	-	-	-	-	-	-	-	-	-	-	-	-	-	-	-	-	-	-	-	ARI_697403916	0.49
2386	ORF78_29	3851592	3852302	+	236	ORF78_29	Predicted ORF	-	-	-	-	-	-	-	-	-	-	-	-	-	-	-	-	-	-	-	-	-	-	-	-	-	-	-	-	-	-	-	-
2387	ORF78_31	3853441	3854691	+	416	ORF78_31	Predicted ORF	-	-	-	-	-	-	-	-	-	-	-	-	-	-	-	-	-	-	-	-	-	-	-	-	-	-	-	-	-	-	-	-
2388	ORF78_32	3854688	3855800	+	370	ORF78_32	Predicted ORF	-	-	-	-	-	-	-	-	-	-	-	-	-	-	-	-	-	-	-	-	-	-	-	-	-	-	-	-	-	-	-	-
2389	ORF78_33	3855797	3857128	+	443	ORF78_33	Predicted ORF	-	-	-	-	-	-	-	-	-	-	-	-	-	-	-	-	-	-	-	-	-	-	-	-	-	-	-	-	-	-	-	-
2390	ORF78_34	3857121	3857855	+	244	ORF78_34	Predicted ORF	-	-	-	-	-	-	-	-	-	-	-	-	-	-	-	-	-	-	-	-	-	-	-	-	-	-	-	-	-	-	-	-
2391	ORF78_35	3858672	3859316	-	214	ORF78_35	Predicted ORF	-	-	-	-	-	-	-	-	-	-	-	-	-	-	-	-	-	-	-	-	-	-	-	-	-	-	-	-	-	-	-	-
2392	ORF79_1	3859852	3859956	+	34	ORF79_1	Predicted ORF	-	-	-	-	-	-	-	-	-	-	-	-	-	-	-	-	-	-	-	-	-	-	-	-	-	-	-	-	-	-	-	-
2393	ORF82_1	3860764	3861084	+	106	ORF82_1	Predicted ORF	-	-	-	-	-	-	-	-	-	-	-	-	-	-	-	-	-	-	-	-	-	-	-	-	-	-	-	-	-	-	-	-
2394	ORF83_1	3861392	3861802	+	136	ORF83_1	Predicted ORF;VF|VFG1907 (gi:15791889) flgB - putative flagellar basal-body rod protein	VFG2351	0.442	-	-	-	-	-	-	-	-	-	-	-	-	-	-	-	-	-	-	-	-	-	-	-	-	-	-	-	-	-	-
2395	ORF83_2	3861805	3862218	+	137	ORF83_2	Predicted ORF;VF|VFG2350 (gi:123442786) flgC - flagellar basal-body rod protein FlgC	VFG1236	0.548	-	-	-	-	-	-	-	-	-	-	-	-	-	-	-	-	-	-	-	-	-	-	-	-	-	-	-	-	-	-
2396	ORF83_5	3864742	3865488	+	248	ORF83_5	Predicted ORF;VF|VFG1995 (gi:52841452) flgF - flagellar basal body rod protein FlgF	VFG1239	0.512	-	-	-	-	-	-	-	-	-	-	-	-	-	-	-	-	-	-	-	-	-	-	-	-	-	-	-	-	-	-
2397	ORF83_6	3865542	3866330	+	262	ORF83_6	Predicted ORF;VF|VFG1913 (gi:15792047) flgG - flagellar basal-body rod protein	VFG1240	0.53	-	-	-	-	-	-	-	-	-	-	-	-	-	-	-	-	-	-	-	-	-	-	-	-	-	-	-	-	-	-
2398	ORF83_7	3866330	3867442	+	370	ORF83_7	Predicted ORF;VF|VFG2344 (gi:123442780) flgI - flagellar P-ring protein precursor	VFG1242	0.57	-	-	-	-	-	-	-	-	-	-	-	-	-	-	-	-	-	-	-	-	-	-	-	-	-	-	-	-	-	-
2399	ORF83_9	3868450	3869142	+	230	ORF83_9	Predicted ORF;VF|VFG2345 (gi:123442781) flgH - flagellar L-ring protein precursor	VFG1241	0.439	-	-	-	-	-	-	-	-	-	-	-	-	-	-	-	-	-	-	-	-	-	-	-	-	-	-	-	-	-	-
2400	ORF83_12	3872697	3874787	+	696	ORF83_12	Predicted ORF	-	-	-	-	-	-	-	-	-	-	-	-	-	-	-	-	-	-	-	-	-	-	-	-	-	-	-	-	-	-	-	-
2401	ORF83_13	3874851	3875909	-	352	ORF83_13	Predicted ORF;VF|VFG1338 (gi:22537319) neuB - N-acetyl neuramic acid synthetase NeuB	VFG0311	0.443	-	-	-	-	-	-	-	-	-	-	-	-	-	-	-	-	-	-	-	-	-	-	-	-	-	-	-	-	ARI_484356518	0.636
2402	ORF83_22	3883914	3884198	+	94	ORF83_22	Predicted ORF	-	-	-	-	-	-	-	-	-	-	-	-	-	-	-	-	-	-	-	-	-	-	-	-	-	-	-	-	-	-	-	-
2403	ORF83_24	3884886	3886415	+	509	ORF83_24	Predicted ORF;VF|VFG1214 (gi:15599743) pilR - two-component response regulator PilR	VFG1248	0.503	-	-	-	-	-	-	-	-	-	-	-	-	-	-	-	-	-	-	-	-	-	-	-	-	-	-	-	-	-	-
2404	ORF83_26	3888989	3889312	+	107	ORF83_26	Predicted ORF;VF|VFG2327 (gi:123442763) fliE - flagellar hook-basal body complex protein FliE	VFG1250	0.467	-	-	-	-	-	-	-	-	-	-	-	-	-	-	-	-	-	-	-	-	-	-	-	-	-	-	-	-	-	-
2405	ORF83_28	3891029	3892057	+	342	ORF83_28	Predicted ORF;VF|VFG2329 (gi:123442765) fliG - flagellar motor switch protein FliG	VFG1252	0.559	-	-	-	-	-	-	-	-	-	-	-	-	-	-	-	-	-	-	-	-	-	-	-	-	-	-	-	-	-	-
2406	ORF83_30	3893029	3894348	+	439	ORF83_30	Predicted ORF;T3SS|T3SS_BscN|T3A01010000016|ATPase|Bordetella pertussis Tohama I	VFG1254	0.58	-	-	-	-	-	-	-	-	-	-	-	-	-	-	T3SS_BscN	0.451	-	-	-	-	-	-	-	-	-	-	-	-	-	-
2407	ORF83_33	3896547	3897041	+	164	ORF83_33	Predicted ORF	-	-	-	-	-	-	-	-	-	-	-	-	-	-	-	-	-	-	-	-	-	-	-	-	-	-	-	-	-	-	-	-
2408	ORF83_34	3897050	3898093	+	347	ORF83_34	Predicted ORF;VF|VFG2019 (gi:52842019) fliM - flagellar protein	VFG1256	0.559	-	-	-	-	-	-	-	-	-	-	-	-	-	-	-	-	-	-	-	-	-	-	-	-	-	-	-	-	-	-
2409	ORF83_35	3898086	3898481	+	131	ORF83_35	Predicted ORF;VF|VFG2336 (gi:123442772) fliN - flagellar motor switch protein FliN	VFG1257	0.634	-	-	-	-	-	-	-	-	-	-	-	-	-	-	-	-	-	-	-	-	-	-	-	-	-	-	-	-	-	-
2410	ORF83_37	3898903	3899688	+	261	ORF83_37	Predicted ORF;VF|VFG2338 (gi:123442774) fliP - flagellar biosynthetic protein FliP	VFG1259	0.594	-	-	-	-	-	-	-	-	-	-	-	-	-	-	-	-	-	-	-	-	-	-	-	-	-	-	-	-	-	-
2411	ORF83_38	3899817	3900086	+	89	ORF83_38	Predicted ORF;VF|VFG1929 (gi:15792979) fliQ - flagellar biosynthetic protein	VFG1260	0.528	-	-	-	-	-	-	-	-	-	-	-	-	-	-	-	-	-	-	-	-	-	-	-	-	-	-	-	-	-	-
2412	ORF83_40	3900939	3902072	+	377	ORF83_40	Predicted ORF;VF|VFG1900 (gi:15791703) flhB - flagellar biosynthetic protein	VFG1262	0.492	-	-	-	-	-	-	-	-	-	-	-	-	-	-	-	-	-	-	-	-	-	-	-	-	-	-	-	-	-	-
2413	ORF83_41	3902266	3904362	+	698	ORF83_41	Predicted ORF;VF|VFG2356 (gi:123442793) flhA - flagellar biosynthesis protein FlhA	VFG1263	0.647	-	-	-	-	-	-	-	-	-	-	-	-	-	-	-	-	-	-	-	-	-	-	-	-	-	-	-	-	-	-
2414	ORF83_44	3906837	3907559	+	240	ORF83_44	Predicted ORF;VF|VFG1894 (gi:15791453) fliA - putative RNA polymerase sigma factor for flagellar operon	VFG2010	0.562	-	-	-	-	-	-	-	-	-	-	-	-	-	-	-	-	-	-	-	-	-	-	-	-	-	-	-	-	-	-
Microbial Bioinformatics Group at MML, SJTU

## Sheet: VF
VRprofile
Ha-values for the genes in the subject genome against the query databases
No	ORF(aa)	Length	Ha-value	Gene related to	functions
1	2_16()	257	0.482	CcmC from Legionella : ccmC, putative heme lyase for CcmE	Iron uptake; Required for cytochrome c production, promotes iron assimilation and intracellular infection
2	2_29()	246	0.435	Flagella from Legionella : motC;flgA; flgB; flgC; flgD; flgE; flgF; flgG; flgH; flgI; flgK; flgL; flhA; flhB; flhF; fliA; fliC; fliD; fliE; fliF; fliG; fliH; fliJ; fliM; fliN; fliO; fliP; fliQ; fliR; fliS; motB; motC; (Motility);	Not required for intracellular growth but enhance the invasion capacity
3	2_41()	135	0.444	Agf from Salmonella : csgE(Adherence)	Aids in attachment to the villi of enterocytes, also cause the bacteria to become attached to each other
4	2_42()	133	0.459	Agf from Salmonella : csgF(Adherence)	Aids in attachment to the villi of enterocytes, also cause the bacteria to become attached to each other
5	2_43()	277	0.653	csgA; csgB; csgC; csgE; csgF; csgG;: Adherence; Fimbrial;	Aids in attachment to the villi of enterocytes, also cause the bacteria to become attached to each other
6	2_147()	440	0.643	PAI III536 from Escherichia UPEC : orf48	Inserted locus: thrW tRNA
7	2_148()	711	0.631	PAI III536 from Escherichia UPEC : orf47	thrW tRNA
8	2_153()	352	0.429	PAI I536 from Escherichia UPEC : z1204	selC tRNA
9	2_187()	214	0.463	Gene located in PAI I536 from Escherichia UPEC: z1204;	selC tRNA
10	2_188()	404	0.605	Gene located in PAI I536 from Escherichia UPEC: z1203	selC tRNA
11	4_32()	453	0.616	SRL from Shigella : orf34	Inserted locus: serX tRNA; Contains genes encoding resistance to streptomycin, ampicillin, and tetracycline and a complete ferric dicitrate uptake system
12	4_51()	1017	0.515	espP;StcE from Escherichia EHEC	Serine protease, Cleaves coagulation factor V
13	4_56()	391	0.427	T2SS from Shigella : gspK	Unknown: gsp genes are located on the S. dysenteriae Sd197 and S. boydii Sb227 chromosomes. Those genes show significant similarity to those from ETEC and Vibrio cholerae responsible for secreting the E.coli heat labile toxin (Ltx) and cholera toxin (Ctx), respectively. While Shiga toxin has an overall similar structure to Ctx and Ltx.
14	4_57()	225	0.453	T2SS from Shigella : gspJ	secretion system
15	4_60()	152	0.691	T2SS from Shigella : gspG	secretion system
16	4_61()	424	0.66	T2SS from Shigella : gspF	secretion system
17	4_62()	529	0.705	T2SS from Shigella : gspE	secretion system
18	4_63()	693	0.727	T2SS from Shigella : gspD	secretion system
19	4_78()	488	0.684	Gene located in SPI-5 from Salmonella : pipD	serT tRNA;Phenotype: Associated with enteropathogenesis; Encode effectors that are induced by distinct regulatory cues and targeted to different TTSS:SopB is secreted by TTSS of SPI1;PipB is translocated by the SPI-2 TTSS to the Salmonella-containing vacuole and Salmonella-induced filaments
20	4_89()	202	*	T6SS from Vibrio : vasI; T3SS1 (Type III secretion system);Related genes: exsA; exsD; sycN; tyeA; vcrD; vcrG; vcrH; vcrR; vcrV; vecA; virG; vopB; vopD; vopN; vopQ; vopR; vopS; VPA0450; vscB; vscC; vscD; vscF; vscG; vscH; vscI; vscJ; vscK; vscL; vscN; vscO; vscP; vscQ; vscR; vscS; vscT; vscU; vscX; vscY; vxsC;	T3SS1 uses a multifaceted mechanism to cause the cytotoxicity of host cells, involving the induction of autophagy, cell rounding, and cell lysis.
21	4_90()	513	*	T6SS from Vibrio : vasH	Requires endocytosis by host cell to secrete VgrG,Functions:Antibacterial and antienkaryotic activities
22	4_93()	446	0.617	T6SS from Vibrio cholerae O1 biovar El Tor str. N16961 (O1 biovar eltor): vasE	Requires endocytosis by host cell to secrete VgrG,Functions:Antibacterial and antienkaryotic activities
23	4_95()	413	*	T6SS from Vibrio cholerae O1 biovar El Tor str. N16961 (O1 biovar eltor): vasC	Requires endocytosis by host cell to secrete VgrG,Functions:Antibacterial and antienkaryotic activities
24	4_97()	590	0.536	T6SS from Vibrio : vasA	Requires endocytosis by host cell to secrete VgrG,Functions:Antibacterial and antienkaryotic activities
25	4_114()	711	0.655	Gene located in PAI III536 from Escherichia UPEC : orf47	thrW tRNA
26	5_8()	358	0.43	Gene located in PAI III536 from Escherichia UPEC: orf7	thrW tRNA
27	5_16()	857	0.473	ClpC from Listeria monocytogenes EGD-e (serovar 1/2a)	Stress protein;An ATPase promoting early escape form the phagosome of macrophages; ClpC is also required for adhesion and invasion, possibly by modulating the expression of InlA,InlB and ActA
28	5_92()	149	0.852	Fur from Salmonella enterica subsp. enterica serovar Typhimurium str. LT2	Repress the expression of iron-regulated genes; Also required for acid-induced activation of atr genes
29	5_101()	315	0.54	SPI-2 from Salmonella enterica subsp. enterica serovar Typhimurium str. LT2 : orf319	valV tRNA;Phenotype: Encodes a second TTSS that is essential for intracellular growth; Necessary in the systemic phase of inection
30	5_119()	760	0.442	FeoAB from Legionella : feoB;	Related genes: feoA; feoB; for Iron uptake; Ferrous iron uptake;Functions: A feoB mutant of L. pneumophila has a lowered Fe2+ uptake and is attenuated for intracellular growth
31	5_253()	337	0.599	O-antigen from Yersinia enterocolitica subsp. enterocolitica 8081 (biotype 1B): galE	LPS O antigen mutants were severely impaired in their ability to colonize the Peyer's patches and did not colonize spleen and liver. The absence of O antigen in the outer membrane affects the expression of other Yersinia virulence factors.
32	5_288()	486	*	IraAB from Legionella : iraB	IraA, a methyltransferase, is critical for virulence; IraB, a homologue of di- and tri-peptide transporters, may involved in a novel method of iron acquisition which may utilize iron-loaded peptides
33	5_300()	207	0.58	ClpP from Listeria	Stress protein; Serine protease involved in proteolysis and is required for growth under stress conditions
34	8_36()	504	0.581	PAI III536 from Escherichia : orf45	putative lysil-tRNA synthetase LysU
35	8_117()	366	0.65	Gene related to Type IV pili from Pseudomonas : pilT	adherence; Attaches to host cells, but not to mucin, causing a twitching motility that allows the bacteria to move along the cell surface; biofilm formation
36	8_118()	369	0.493	Type IV pili from Pseudomonas : pilU	Attaches to host cells, but not to mucin, causing a twitching motility that allows the bacteria to move along the cell surface; biofilm formation
37	8_155()	436	0.702	Gene located in PAI III536 from Escherichia : orf48	thrW tRNA:putative lysin/cadaverin transporter
38	8_156()	711	0.684	PAI III536 from Escherichia : orf47	thrW tRNA: putative cadaverin decarboxylase
39	15_17()	476	0.672	LOS from Haemophilus influenzae Rd KW20 (serotype d) : rfaE	Endotoxin; Major immunogen, LOS phosphorylcholine (ChoP) may influence invasion via interaction with PAF receptor and stimulates of inflammotory signals, LPS phase variation is characterized by the spontaneous loss and gain of oligosaccharide structures present in the outer core. the phase variable expression of LPS biosynthesis genes promotes evasion of antigen-specific host immune defences and …
40	15_51()	284	0.447	PanC/PanD from Mycobacterium tuberculosis H37Rv : panC	pantoate--beta-alanine ligase for Metabolic adaptation; Functions: Lipid biosynthesis and metabolism play a pivotal role in the intracellular replication and persistence of M. tuberculosis. Pantothenic acid (vitamin B5) is an essential molecule required for the synthesis of coenzyme A and acyl carrier protein (ACP). PanC (pantothenate synthetase) and PanD (aspartate-1-decarboxylase) involved in p…
41	15_52()	126	0.444	PanC/PanD from Mycobacterium tuberculosis H37Rv : panD	pantoate--beta-alanine ligase for Metabolic adaptation; Functions: Lipid biosynthesis and metabolism play a pivotal role in the intracellular replication and persistence of M. tuberculosis. Pantothenic acid (vitamin B5) is an essential molecule required for the synthesis of coenzyme A and acyl carrier protein (ACP). PanC (pantothenate synthetase) and PanD (aspartate-1-decarboxylase) involved in p…
42	16_36()	684	0.658	T2SS from Shigella : gspD	secretion system;Functions: Still unknown.
43	16_37()	524	0.66	T2SS from Shigella : gspD	secretion system;Functions: Still unknown.
44	16_38()	407	0.607	T2SS from Shigella : gspF	secretion system;Functions: Still unknown.
45	16_39()	152	0.71	T2SS from Shigella : gspG	secretion system;Functions: Still unknown.
46	18_37()	315	0.771	LOS from Haemophilus influenzae Rd KW20 (serotype d) : rfaD	Major immunogen; LOS phosphorylcholine (ChoP) may influence invasion via interaction with PAF receptor and stimulates of inflammotory signals; LPS phase variation is characterized by the spontaneous loss and gain of oligosaccharide structures present in the outer core. the phase variable expression of LPS biosynthesis genes promotes evasion of antigen-specific host immune defences and allow colon…
47	18_41()	353	0.507	LPS from Pseudomonas : waaF	Adherence; Endotoxin; Mediates biological effects including resistance to serum killing and phagocytosis; The binding to normal CFTR (cystic fibrosis transmembrane conductance regulator) and invasion of host cells may make a contribution to virulence in the human eye; Internalization by binding to normal CFTR protein expressed by airway epithelial cells followed by desquamation of bacteria-laden …
48	18_43()	426	0.427	LPS from Pseudomonas : waaA	Adherence; Endotoxin; Mediates biological effects including resistance to serum killing and phagocytosis; The binding to normal CFTR (cystic fibrosis transmembrane conductance regulator) and invasion of host cells may make a contribution to virulence in the human eye; Internalization by binding to normal CFTR protein expressed by airway epithelial cells followed by desquamation of bacteria-laden …
49	18_54()	160	0.431	LPS from Helicobacter pylori 26695: kdtB	H. pylori LPS have much lower immunobiological activities than enterobacterial LPS, thus may prolong H. pylori infection for longer; Mediates a lectin-like interaction with laminin, the binding may disrupt epithelial cell-basement membrane interactions contributing to the disruption of gastric mucosal integrity and the development of gastric leakiness associated with the bacterium
50	18_94()	469	0.53	Gene from Mycobacterium : glnA1	Product: GLUTAMINE SYNTHETASE GLNA1 (GLUTAMINE SYNTHASE) (GS-I)
51	19_42()	167	0.455	Gene located in VPI from Vibrio cholerae O1 biovar El Tor str. N16961 (O1 biovar eltor): tagD	Inserted locus: Flanked by att sites, inserts near the ssrA locus, a tRNA-like gene;Phenotype:Contains the tcp gene cluster encoding the type IV pilus toxin-coregulated pilus colonization factor which can act as the cholera toxin bacteriophage (CTXΦ) receptor; Also contains genes (toxT, tcpPH) that regulate virulence factor expression; Recently a virulence factor Mop encoded by VPI has been ident…
52	19_203()	214	0.495	LetA/S from Legionella : letA	Activates gene expression indirectly by counteracting the repressor of translation known as CsrA or RsmA
53	21_15()	904	0.522	MgtBC from Salmonella : mgtB	MgtA and MgtB are not required for intracellular survival or for virulence, MgtC is essential for both functions
54	22_23()	432	0.492	Gene located in SRL from Shigella flexneri 2a str. YSH6000 : orf9	Inserted locus: serX tRNA;Phenotype: Contains genes encoding resistance to streptomycin, ampicillin, and tetracycline and a complete ferric dicitrate uptake system
55	22_27()	548	0.73	Hsp60 from Legionella : htpB	Adherence; Mediate a complement-independent attachment to mammalian and amoebal host cells
56	23_24()	725	0.773	KatAB from Legionella : katB	catalase-peroxidase KatB;Stress protein; A periplasmic catalase, expressed maximally during the postexponential phase; Important for intracellular survival and transmission	Unde+A5:E26caprenyl-diphosphatase/bacA/drug enzymatic destruction, bacitracin resistance
57	23_58()	291	0.443	Enterobactin from Escherichia : fepC	Iron uptake: the siderophore enterobactin imported through the FepA receptor and the FepBCDG system
58	23_225()	493	0.513	PhoPQ from Salmonella : phoQ	Product: sensor kinase protein;Activated by low divalent cations magnesium and calcium levels; Control expression of more than 40 genes; Required for intracellular survival, cantionic antimicrobial peptides (CAMPs) resistance, stimulation of cytokine secretion
59	23_224()	225	0.662	PhoPQ from Salmonella : phoP	Activated by low divalent cations magnesium and calcium levels; Control expression of more than 40 genes; Required for intracellular survival, cantionic antimicrobial peptides (CAMPs) resistance, stimulation of cytokine secretion
60	23_242()	349	0.47	PAI III536 from Escherichia : orf7	thrW tRNA
61	23_276()	193	0.658	SodB from Legionella : sodB; GspA (global stress gene)	Stress protein; Functions: 19-kDa GroEL-like, Dispensable for bacterial survival and growth in macrophage infection
62	23_332()	412	*	PDIM from Mycobacterium : mas	cellwall, important immunomodulatory component of the cell wall; structural role in providing a stable base for the insertion of other lipid and also play a role as a fluidity modifier, whose function could be to modulate cell wall viscosity
63	23_368()	470	0.855	SPI-2 from Salmonella : pykF	Inserted locus: valV tRNA;Phenotype: Encodes a second TTSS that is essential for intracellular growth; Necessary in the systemic phase of inection
64	23_420()	350	0.542	OmpA from Escherichia : ompA	ompA: Invasion; Serum resistance; contributes to brain mecrovascular endothelial cells (BMECs) invasion via a ligand-receptor interaction. Interaction of OmpA with its receptor induces actin condensation at the binding site. The actin reorganization induced by E. coli depends on activation of several host proteins involved in signaling, including focal adhesion kinase, PI3-kinase, PKC-α, and cave…
65	25_52()	701	0.515	Flagella from Pseudomonas : flhA	Adherence; Swimming motility, Play a role in biofilm formation and other pathogenic adaptations
66	25_53()	371	0.445	Flagella from Pseudomonas : flhB	Adherence; Swimming motility, Play a role in biofilm formation and other pathogenic adaptations
67	25_54()	263	0.456	Flagella from Pseudomonas : fliR	Adherence; Swimming motility, Play a role in biofilm formation and other pathogenic adaptations
68	25_55()	89	0.483	Flagella from Pseudomonas : fliQ	Adherence; Swimming motility, Play a role in biofilm formation and other pathogenic adaptations
69	25_56()	245	0.571	Flagella from Pseudomonas : fliP	Adherence; Swimming motility, Play a role in biofilm formation and other pathogenic adaptations
70	25_63()	443	0.614	Flagella from Pseudomonas : fliI	Adherence; Swimming motility, Play a role in biofilm formation and other pathogenic adaptations
71	25_69()	140	0.486	Flagella from Legionella : flgC	flagellar basal body rod protein FlgC;Adherence; Swimming motility, Play a role in biofilm formation and other pathogenic adaptations
72	25_72()	241	0.433	Flagella from Pseudomonas : flgF	flagellar basal-body rod protein FlgF;Adherence; Swimming motility, Play a role in biofilm formation and other pathogenic adaptations
73	25_73()	261	0.594	Flagella from Pseudomonas : flgG	flagellar basal-body rod protein FlgG;Adherence; Swimming motility, Play a role in biofilm formation and other pathogenic adaptations
74	25_74()	219	0.47	Flagella from Pseudomonas : flgH	flagellar L-ring protein precursor FlgH;Adherence; Swimming motility, Play a role in biofilm formation and other pathogenic adaptations
75	25_75()	364	0.563	Flagella from Pseudomonas : flgI	flagellar P-ring protein precursor FlgI;Adherence; Swimming motility, Play a role in biofilm formation and other pathogenic adaptations
76	25_144()	428	0.571	O-antigen from Yersinia : manC	LPS O antigen mutants were severely impaired in their ability to colonize the Peyer's patches and did not colonize spleen and liver. The absence of O antigen in the outer membrane affects the expression of other Yersinia virulence factors.
77	25_145()	460	0.676	O-antigen from Yersinia : manB	LPS O antigen mutants were severely impaired in their ability to colonize the Peyer's patches and did not colonize spleen and liver. The absence of O antigen in the outer membrane affects the expression of other Yersinia virulence factors.
78	25_146()	371	0.739	O-antigen from Yersinia : gmd	LPS O antigen mutants were severely impaired in their ability to colonize the Peyer's patches and did not colonize spleen and liver. The absence of O antigen in the outer membrane affects the expression of other Yersinia virulence factors.
79	25_153()	621	0.443	LPS from Bordetella : bplL	Endotoxin;Prevents clearance of the organism by host surfactant protein; Confers protection to the bacterium from complement-mediated cell lysis
80	27_35()	323	0.449	Capsule from Campylobacter : kpsF	Adherence; Play an important role in bacterial survival and persistance in the enviroment and evasion of host immune response; The presence of heptose residues in the capsule may be important for virulence. Heptose residues found in some cell surface-located glycoconjugates are required for adhesion
81	27_82()	286	0.444	Type IV pili from Pseudomonas : xcpA/pilD	Adherence; Attaches to host cells, but not to mucin, causing a twitching motility that allows the bacteria to move along the cell surface; biofilm formation
82	27_85()	411	0.431	Type IV pili from Legionella : pilC	Adherence; Contribute to complement-independent binding, perhaps as the ligand for protozoan lectin
83	27_86()	500	0.522	Type IV pili from Pseudomonas : pilB	adherence;Attaches to host cells, but not to mucin, causing a twitching motility that allows the bacteria to move along the cell surface; biofilm formation
84	29_30()	170	0.54	SodCI from Salmonella : sodCI(Product: Gifsy-2 prophage: superoxide dismutase precursor (Cu-Zn))	Stress protein; Contribute to survival during systemic phase of infection
85	33_7()	186	0.595	Gene located in SPI-4 from Salmonella : ssb	Inserted locus: Flanked by ssb and soxSR;Phenotype: Has eighteen putative ORFs, encodes a type I secretion system that mediates toxin secretion, much like E.coli hemolysin secretion, SPI4-dependent mechanism of inducing apoptosis may act in concert with the binding of SipB to caspase-1
86	34_58()	674	*	Intercellular adhesion proteins from Staphylococcus : icaB	Adherence; Biofilm formation; icaA, icaB, icaC, icaD synthesize a polysaccharide, poly-n-succinyl-β-1,6 glucosamine (PNSG) during infection;PNSG is critical to biofilm elaboration, allowing bacteria to adhere to one another, and may also promote adherence to other molecules, such as ECM components
87	34_59()	444	*	Intercellular adhesion proteins from Staphylococcus : icaA	Adherence; Biofilm formation; icaA, icaB, icaC, icaD synthesize a polysaccharide, poly-n-succinyl-β-1,6 glucosamine (PNSG) during infection;PNSG is critical to biofilm elaboration, allowing bacteria to adhere to one another, and may also promote adherence to other molecules, such as ECM components
88	34_136()	391	0.859	Gene located in LEE(EHEC) from Escherichia : intL	Inserted locus: selC tRNA;Phenotype: Similar to the EPEC LEE, this PAI is involved in the production of proteins associated with intimate adherence to intestinal epithelial cells, initiation of host signal transduction pathways, and the formation of A/E lesions
89	37_3()	193	0.42	LOS from Campylobacter : gmhA	Adherence; Phase variation; Structural mimicry; Functions: ability to colonize a wide variety of hosts and intestinal niches; molecular mimicry; avoidance of host defences; generate crossreacting antibodies
90	37_8()	436	0.58	Isocitrate lyase from Mycobacterium : icl	Metabolic adaptation; Required for persistant infection
91	40_4()	85	0.682	Ibes (invasion of brain endothelial cells)from Escherichia : ibeB	Contributes to brain mecrovascular endothelial cells (BMECs) invasion via a ligand-receptor interaction
92	42_5()	356	0.536	OmpA from Escherichia : ompA	Contributes to brain mecrovascular endothelial cells (BMECs) invasion via a ligand-receptor interaction. Interaction of OmpA with its receptor induces actin condensation at the binding site.The actin reorganization induced by E. coli depends on activation of several host proteins involved in signaling, including focal adhesion kinase, PI3-kinase, PKC-α, and caveolin-1; OmpA also binds to C4b-bind…
93	49_1()	339	0.588	Ibes from Escherichia : ibeB	Contributes to brain mecrovascular endothelial cells (BMECs) invasion via a ligand-receptor interaction
94	49_2()	227	0.52	SPI-5 from Salmonella : copR	Copper resistance; transcriptional regulatory protein;Inserted locus:serT tRNA;Phenotype: link with enteropathogenesis; Encode effectors targeted to different TTSS:SopB is secreted by TTSS of SPI1;PipB is translocated by the SPI-2 TTSS to the Salmonella-containing vacuole and Salmonella-induced filaments
95	56_31()	235	0.506	VPI-2 from Vibrio : nanE	Inserted locus: ser tRNA;Phenotype: Encoding an accessory virulence factor neuraminidase (nanH). Naminidase is secreted and converts oligosaccharides by cleavage of sialic acid. The reaction results in a large number of ganglioside GM1-like molecules on host cell surfaces, which serve as binding sites for the cholera toxin. But this process in not absolutely required for the action of cholera tox…
96	56_33()	299	0.712	VPI-2 from Vibrio : nanA	Inserted locus: ser tRNA;Phenotype: Encoding an accessory virulence factor neuraminidase (nanH). Naminidase is secreted and converts oligosaccharides by cleavage of sialic acid. The reaction results in a large number of ganglioside GM1-like molecules on host cell surfaces, which serve as binding sites for the cholera toxin. But this process in not absolutely required for the action of cholera tox…
97	58_6()	295	0.441	PAI III536 from Escherichia : orf51	Inserted locus: thrW tRNA
98	58_7()	227	0.449	PAI I536 from Escherichia : ORF72	Inserted locus: thrW tRNA
99	58_10()	165	0.57	PAI I536 from Escherichia : z1216	Inserted locus: selC tRNA
100	58_11()	101	0.485	PAI II536 from Escherichia : orf86	Inserted locus: LeuX tRNA
101	58_12()	165	0.497	Gene located in VPI-2 from Vibrio : radC	Inserted locus: ser tRNA, Encoding an accessory virulence factor neuraminidase (nanH). Naminidase is secreted and converts oligosaccharides by cleavage of sialic acid. The reaction results in a large number of ganglioside GM1-like molecules on host cell surfaces, which serve as binding sites for the cholera toxin. But this process in not absolutely required for the action of cholera toxin. VPI-2 …
102	67_14()	61	0.59	CsrA from Legionella : csrA	Regulation; Post-transcriptional repression of the transmission regulon
103	67_20()	327	0.791	RpoS from Salmonella : rpoS	Necessary for sustaining a log-phase acid tolerance response (ATR), induction a stationary-phase acid survival system, production of thin aggregative fimbriae and expression of spv gene during stationary phase
104	67_32()	743	0.423	RelA from Legionella : relA	dispensable for intracellular growth within amoebae or the alveolar macrophages, but dedicate to convert from a replicated to a virulent state
105	67_46()	552	0.655	Alginate from Pseudomonas : algU	Antiphagocytosis; Serum resistance; biofilm formation; Contributes to the persistence of the bacteria in the CF lung: act as an adhesin, preventing the bacteria from being expelled from the lung, and alginate slime layer makes it more difficult for phagocytes to ingest and kill the bacteria
106	78_29()	236	0.48	Capsule from Streptococcus pneumoniae TIGR4 (serotype 4): cps4I	Antiphagocytosis; Resistant to complement deposition and masks cell wall-associated complement from being recognized by the complement receptors on phagocytes
107	78_26()	420	0.438	Capsule from Staphylococcus : cap8O	Antiphagocytosis
108	83_2()	137	0.442	Flagella from Yersinia : flgB	Secretion system; Invasion; Motility; Required for efficient cellular invasion. YplA, a phospholipase is secreted by this type III flagellum secretion system. YplA is required for survival of Y. enterocolitica in the Peyer's patches and for stimulation of the acute inflammatory response of the host to the infection.
109	83_5()	248	0.548	Flagella from Pseudomonas : flgC	Adherence; Swimming motility; biofilm formation and other pathogenic adaptations
110	83_6()	262	0.512	Flagella from Pseudomonas : flgF	Adherence; Swimming motility; biofilm formation and other pathogenic adaptations
111	83_7()	370	0.53	Flagella from Pseudomonas : flgG	Adherence; Swimming motility; biofilm formation and other pathogenic adaptations
112	83_9()	230	0.57	Flagella from Pseudomonas : flgI	Adherence; Swimming motility; biofilm formation and other pathogenic adaptations
113	83_12()	696	0.439	Flagella from Pseudomonas : flgH	Adherence; Swimming motility; biofilm formation and other pathogenic adaptations
114	83_22()	94	0.443	Lewis antigen from Helicobacter : neuB	Molecular mimicry; The O-chain region of LPS express Lewis antigen that are also expressed in the gastric mucosa of humans. This antigenic mimicry may suppress an immune response against the bacteria, or allow it to adhere to the gastric mucasa or play a role in certain autoimmune aspects
115	83_16()	230	*	Lewis antigen from Helicobacter : neuA/flmD	Molecular mimicry; The O-chain region of LPS express Lewis antigen that are also expressed in the gastric mucosa of humans. This antigenic mimicry may suppress an immune response against the bacteria, or allow it to adhere to the gastric mucasa or play a role in certain autoimmune aspects
116	83_17()	390	*	LPS from Bordetella : bplF	Endotoxin; Prevents clearance of the organism by host surfactant protein, Confers protection to the bacterium from complement-mediated cell lysis
117	83_18()	332	*	Capsule from Staphylococcus : cap8E	Antiphagocytosis;
118	83_26()	107	0.503	Flagella from Pseudomonas : fleQ	Adherence; Swimming motility; biofilm formation and other pathogenic adaptations
119	83_28()	342	0.467	Flagella from Pseudomonas : fliE	Adherence; Swimming motility; biofilm formation and other pathogenic adaptations
120	83_30()	439	0.559	Flagella from Pseudomonas : fliG	Adherence; Swimming motility; biofilm formation and other pathogenic adaptations
121	83_33()	164	0.58	Flagella from Pseudomonas : fliI	Adherence; Swimming motility; biofilm formation and other pathogenic adaptations
122	83_35()	131	0.559	Flagella from Pseudomonas : fliM	Adherence; Swimming motility; biofilm formation and other pathogenic adaptations
123	83_37()	261	0.634	Flagella from Pseudomonas : fliN	Adherence; Swimming motility; biofilm formation and other pathogenic adaptations
124	83_38()	89	0.594	Flagella from Pseudomonas : fliP	Adherence; Swimming motility; biofilm formation and other pathogenic adaptations
125	83_40()	377	0.528	Flagella from Pseudomonas : fliQ	Adherence; Swimming motility; biofilm formation and other pathogenic adaptations
126	83_41()	698	0.492	Flagella from Pseudomonas : flhB	Adherence; Swimming motility; biofilm formation and other pathogenic adaptations
127	83_44()	240	0.647	Flagella from Pseudomonas : flhA	Adherence; Swimming motility; biofilm formation and other pathogenic adaptations
128	83_43()	296	0.534	Flagella from Pseudomonas : fleN	Adherence; Swimming motility; biofilm formation and other pathogenic adaptations
129	83_46()	241	0.562	Flagella from Legionella : fliA	enhance intracellular invasion capacity
130
131
1

## Sheet: AR
Ha-values for the genes in the subject genome against the query databases
No	ORF(aa)	Length	Ha-value	AR
1	2_18()	205		bcrA/ABC transporter system, bacitracin efflux pump.Antibiotic Resistance bacitracin,Organism Bacillus cereus subsp. cytotoxis NVH 391-98
2	4_48()	546	0.68	tcma/ Resistance to tetracenomycin C by an active tetracenomycin C efflux system which is probably energized by transmembrane electrochemical gradients.Organism Streptomyces coelicolor A3(2)
3	5_55()	153	0.68	xanthine-guanine phosphoribosyltransferase/tet34/tetracycline
4	5_61()	1074	0.425	RND multidrug efflux transporter MexB/tigecycline resistance,resistance-nodulation-cell division (RND) drug efflux,aminoglycoside resistance,fluoroquinolone resistance,tetracycline resistance,beta lactam resistance
5	5_69()	633	0.512	pbp2/penicillin
6	6_24()	252	*	blaB4/ Metallo-beta-lactamase
7	7_78()	278	0.734	dimethyladenosine transferase/ksgA/kasugamycin
8	14_6()	399	1	TetA/major facilitator superfamily (MFS) drug efflux,tetracycline resistance
9	15_30()	268	0.745	Undecaprenyl-diphosphatase/bacA/drug enzymatic destruction, bacitracin resistance
10	16_50()	833	0.54	penicillin-binding protein 1A/pbp1A/ penicillin ; Haemophilus influenzae PittEE
11	18_15()	402	0.552	multidrug resistance protein D/pbpD/ multidrug ; Haemophilus influenzae PittEE
12	19_71()	402	0.555	multidrug resistance protein D/emrd/major facilitator superfamily (MFS) drug efflux/aminoglycoside resistance
13	23_20()	214	0.453	macrolide transporter ATP-binding /permease protein/macB/Multidrug resistance efflux pump. Macrolide-specific efflux system, Antibiotic Resistance macrolide, Organism Escherichia fergusonii ATCC 35469
14	23_27()	299	0.488
15	23_98()	456	0.643	multidrug efflux protein/mdtk/enoxacin, norfloxacin,Organism Enterobacter sp. 638
16	23_225()	493	*	vansd/drug target replacement,vancomycin resistance,teicoplanin resistance
17	23_284()	208	0.692	chloramphenicol acetyltransferase variant/catb5/chloramphenicol resistance, drug enzymatic destruction;Vibrio cholerae 12129(1)
18	23_311()	234	0.423	macrolide transporter ATP-binding /permease protein/macB/Citrobacter youngae ATCC 29220
19	25_137()	1040	0.47	multidrug efflux protein/mexW
20	27_94()	439	0.519	outer membrane protein TolC/Multidrug resistance efflux pump.Antibiotic Resistance acriflavin,aminoglycoside,beta_lactam,glycylcycline,macrolide,Organism Salmonella enterica subsp. arizonae serovar 62:z4,z23
21	34_8()	1037	0.685	acrB/acriflavin resistance,glycylcycline resistance,resistance-nodulation-cell division (RND) drug efflux,aminoglycoside resistance,beta lactam resistance,macrolide resistance, Enterobacter aerogenes
22	34_9()	404	0.532	acridine efflux pump/acrA/Enterobacter cancerogenus ATCC 35316/acriflavin resistance,glycylcycline resistance,resistance-nodulation-cell division (RND) drug efflux,aminoglycoside resistance,beta lactam resistance,macrolide resistance
23	34_90()	668	0.536	macB/Resistance-nodulation-cell division transporter system. Multidrug resistance efflux pump. Macrolide-specific efflux system. Antibiotic Resistance macrolide, Salmonella enterica subsp. enterica serovar Tennessee str. CDC07-0191
24	40_4()	85	0.435	oprm/tigecycline resistance,resistance-nodulation-cell division (RND) drug efflux,aminoglycoside resistance,fluoroquinolone resistance,tetracycline resistance,beta lactam resistance
25	49_1()	339	*	smef/Multidrug resistance efflux pump,resistance-nodulation-cell division (RND) drug efflux,fluoroquinolone resistance
26	64_2()	1033	0.484	mexf/chloramphenicol resistance,resistance-nodulation-cell division (RND) drug efflux,fluoroquinolone resistance
27	72_1()	280	0.461	ampE
28	74_2()	477	0.461	ampE

## Sheet: T3SE
VRprofile
Ha-values for the genes in the subject genome against the query databases
								T3SE
No	Synonym	Start	End	Strand	Length(aa)	Gene	Product	Hit	Ha-value

## Sheet: T4SE
VRprofile
Ha-values for the genes in the subject genome against the query databases
No	Synonym	Hit	Ha-value
1	15_25(421)	T4SE_29653378	0.584	low-affinity inorganic phosphate transporter [Coxiella burnetii RSA 493]NCBI Reference Sequence: NP_819070.1

## Sheet: T6SE
VRprofile
Ha-values for the genes in the subject genome against the query databases
No	ORF(aa)	Hit (T6SE)	Ha-value
1	2_183(685)	T6SE_ABG57133	0.743	VgrG-2 protein [Aeromonas hydrophila]GenBank: ABG57133.1
2	2_184(172)	T6SE_ABG57132	0.953	Hcp-2 hemolysin-coregulated protein [Aeromonas hydrophila]GenBank: ABG57132.1
3	4_84(676)	T6SE_ABG57151	0.711	VgrG-2 protein/VgrG-3 protein [Aeromonas hydrophila]GenBank: ABG57151.1
4	34_105(674)	T6SE_ABG57133	0.793	VgrG-2 protein [Aeromonas hydrophila]GenBank: ABG57133.1
5	34_106(172)	T6SE_ABG57132	0.953	Hcp-2 hemolysin-coregulated protein [Aeromonas hydrophila]
6	34_155(299)	T6SE_ABG57133	0.786	VgrG-3 protein/VgrG-2 protein [Aeromonas hydrophila]GenBank: ABG57133.1

## Sheet: T7SE
VRprofile
Ha-values for the genes in the subject genome against the query databases
								T7SE
No	Synonym	Start	End	Strand	Length(aa)	Gene	Product	Hit	Ha-value

## Sheet: PROPHAGE
VRprofile
Ha-values for the genes in the subject genome against the query databases
								Prophage
No	Synonym	Start	End	Strand	Length(aa)	Gene	Product	Hit	Ha-value
56	ORF2_50	105996	106652	-	218	ORF2_50	Predicted ORF;Prophage|Prophage_109521764 NC_008204 gp6 {Mycobacterium phage Qyrzula}	Prophage_34419356	0.528
84	ORF2_91	154594	154821	+	75	ORF2_91	Predicted ORF;Prophage|Prophage_13095918 NC_002671 Csp {Lactococcus phage bIL312}	Prophage_13095918	0.467
153	ORF2_195	290108	290344	-	78	ORF2_195	Predicted ORF;Prophage|Prophage_32170880 NC_004913 hypothetical protein {Stx1 converting phage}	Prophage_116222025	0.446
154	ORF2_196	290344	290724	-	126	ORF2_196	Predicted ORF;Prophage|Prophage_32170879 NC_004913 hypothetical protein {Stx1 converting phage}	Prophage_116222024	0.452
366	ORF5_182	644688	645749	-	353	ORF5_182	Predicted ORF;Prophage|Prophage_148727179 NC_009542 int putative integrase protein {Phage phiO18P}	Prophage_9634085	0.482
368	ORF5_185	646652	647422	-	256	ORF5_185	Predicted ORF;Prophage|Prophage_38229113 NC_005178 cI c repressor {Pseudomonas phage D3112}	Prophage_148727133	0.461
370	ORF5_187	647826	648332	+	168	ORF5_187	Predicted ORF;Prophage|Prophage_9634088 NC_001317 cII CII {Enterobacteria phage 186}	Prophage_148727135	0.476
374	ORF5_196	654444	655514	-	356	ORF5_196	Predicted ORF;Prophage|Prophage_72537722 NC_007145 pbsx family phage portal protein {Burkholderia phage phi52237}	Prophage_145708079	0.579
375	ORF5_197	655514	657229	-	571	ORF5_197	Predicted ORF;Prophage|Prophage_9630329 NC_001895 P gpP {Enterobacteria phage P2}	Prophage_145708080	0.625
376	ORF5_198	657435	658265	+	276	ORF5_198	Predicted ORF;Prophage|Prophage_9634059 NC_001317 V V protein {Enterobacteria phage 186}	Prophage_109289939	0.486
377	ORF5_199	658278	659309	+	343	ORF5_199	Predicted ORF;Prophage|Prophage_134288735 NC_009236 gp2 phage major capsid protein P2 family {Burkholderia phage phiE12-2}	Prophage_72537718	0.554
378	ORF5_200	659319	660026	+	235	ORF5_200	Predicted ORF;Prophage|Prophage_134288705 NC_009236 gp1 phage small terminase subunit {Burkholderia phage phiE12-2}	Prophage_145708083	0.441
379	ORF5_201	660132	660611	+	159	ORF5_201	Predicted ORF;Prophage|Prophage_9630333 NC_001895 L gpL {Enterobacteria phage P2}	Prophage_145708084	0.44
380	ORF5_202	660611	660814	+	67	ORF5_202	Predicted ORF;Prophage|Prophage_134288782 NC_009234 gp46 phage Tail Protein X {Burkholderia phage phiE202}	Prophage_134288701	0.515
382	ORF5_207	662159	662980	+	273	ORF5_207	Predicted ORF;Prophage|Prophage_134288699 NC_009236 gp45 bacteriophage-acquired protein {Burkholderia phage phiE12-2}	Prophage_17313229	0.487
383	ORF5_209	663512	663967	+	151	ORF5_209	Predicted ORF;Prophage|Prophage_134288754 NC_009234 gp40 P2 phage tail completion protein R (GpR) {Burkholderia phage phiE202}	Prophage_145708090	0.444
384	ORF5_212	665044	665382	+	112	ORF5_212	Predicted ORF;Prophage|Prophage_33438913 NC_005056 similar to P2 W putative baseplate protein {Enterobacteria phage WPhi}	Prophage_9634071	0.446
385	ORF5_213	665379	666284	+	301	ORF5_213	Predicted ORF;Prophage|Prophage_30065720 NC_004745 J gpJ {Yersinia phage L-413C}	Prophage_145708095	0.498
386	ORF5_214	666281	666898	+	205	ORF5_214	Predicted ORF;Prophage|Prophage_33438915 NC_005056 similar to P2 I putative baseplate assembly protein {Enterobacteria phage WPhi}	Prophage_145708096	0.507
387	ORF5_217	668461	669636	+	391	ORF5_217	Predicted ORF;Prophage|Prophage_17313241 NC_003278 hypothetical protein {Pseudomonas phage phiCTX}	Prophage_145708101	0.637
388	ORF5_218	669652	670167	+	171	ORF5_218	Predicted ORF;Prophage|Prophage_33438920 NC_005056 similar to P2 FII tail tube {Enterobacteria phage WPhi}	Prophage_41057374	0.517
389	ORF5_219	670230	670511	+	93	ORF5_219	Predicted ORF;Prophage|Prophage_134288708 NC_009236 gp31 phage tail protein E {Burkholderia phage phiE12-2}	Prophage_145708103	0.505
390	ORF5_221	673111	673602	+	163	ORF5_221	Predicted ORF;Prophage|Prophage_9634081 NC_001317 F F protein {Enterobacteria phage 186}	Prophage_9630354	0.46
391	ORF5_222	673599	674735	+	378	ORF5_222	Predicted ORF;Prophage|Prophage_33438925 NC_005056 similar to P2 D tail protein {Enterobacteria phage WPhi}	Prophage_41057378	0.468
416	ORF5_259	715440	716021	+	193	ORF5_259	Predicted ORF;Prophage|Prophage_66391595 NC_007023 tk Tk thymidine kinase {Enterobacteria phage RB43}	Prophage_157311388	0.554
446	ORF5_303	770003	770278	+	91	ORF5_303	Predicted ORF;Prophage|Prophage_9630187 NC_001884 yonN histone-like prokaryotic DNA-binding protein family {Bacillus phage SPBc2}	Prophage_156564019	0.56
450	ORF5_308	775618	776310	-	230	ORF5_308	Predicted ORF;Prophage|Prophage_29566196 NC_004684 gp3 {Mycobacterium phage Rosebush}	Prophage_146329947	0.439
475	ORF5_341	815703	816833	-	376	ORF5_341	Predicted ORF;Prophage|Prophage_113200701 NC_008296 197 gp197 {Phage Syn9}	Prophage_66391516	0.556
476	ORF5_342	816902	819187	-	761	ORF5_342	Predicted ORF;Prophage|Prophage_113200700 NC_008296 196 gp196 {Phage Syn9}	Prophage_61806079	0.545
510	ORF6_26	872942	873409	-	155	ORF6_26	Predicted ORF;Prophage|Prophage_46401827 NC_005859 rnh putative RNaseH ribonuclease {Enterobacteria phage T5}	Prophage_82701057	0.452
537	ORF7_32	911367	912767	+	466	ORF7_32	Predicted ORF;PAI|PAI_CAI36044 replicative DNA helicase DnaB	Prophage_46401697	0.725
546	ORF7_44	925364	925573	+	69	ORF7_44	Predicted ORF;PAI|PAI_AAO18076 unknown	Prophage_13095918	0.493
591	ORF7_109	1000747	1001760	-	337	ORF7_109	Predicted ORF;Prophage|Prophage_41057380 NC_005340 similar to P2 Int putative integrase orf27 {Enterobacteria phage PsP3}	Prophage_9634085	0.623
594	ORF7_113	1003524	1004036	+	170	ORF7_113	Predicted ORF;Prophage|Prophage_148727135 NC_009542 cII putative cII protein {Phage phiO18P}	Prophage_9634088	0.624
595	ORF7_114	1004048	1004554	+	168	ORF7_114	Predicted ORF;Prophage|Prophage_30065737 NC_004745 B gpB {Yersinia phage L-413C}	Prophage_9630361	0.446
598	ORF7_117	1005329	1007404	+	691	ORF7_117	Predicted ORF;Prophage|Prophage_17975119 NC_003313 rep rep {Vibrio phage K139}	Prophage_9634096	0.537
599	ORF7_118	1007416	1007994	+	192	ORF7_118	Predicted ORF;Prophage|Prophage_66392076 NC_007024 possible endodeoxyribonuclease {Xanthomonas phage Xp15}	Prophage_33770559	0.51
601	ORF7_120	1008340	1008576	+	78	ORF7_120	Predicted ORF;Prophage|Prophage_9634100 NC_001317 tum bacteriophage 186 Tum95.5 {Enterobacteria phage 186}	Prophage_33770564	0.461
603	ORF7_122	1009300	1010364	-	354	ORF7_122	Predicted ORF;Prophage|Prophage_134288732 NC_009236 gp5 phage portal protein pbsx family {Burkholderia phage phiE12-2}	Prophage_145708079	0.661
604	ORF7_123	1010368	1012086	-	572	ORF7_123	Predicted ORF;Prophage|Prophage_33438899 NC_005056 similar to P2 P large terminase subunit {Enterobacteria phage WPhi}	Prophage_145708080	0.657
605	ORF7_124	1012279	1013106	+	275	ORF7_124	Predicted ORF;Prophage|Prophage_134288713 NC_009236 gp3 phage capsid scaffolding protein (GPO) {Burkholderia phage phiE12-2}	Prophage_134288755	0.476
606	ORF7_125	1013122	1014189	+	355	ORF7_125	Predicted ORF;Prophage|Prophage_33438901 NC_005056 similar to P2 N major capsid protein precursor {Enterobacteria phage WPhi}	Prophage_9630331	0.608
607	ORF7_126	1014192	1014851	+	219	ORF7_126	Predicted ORF;Prophage|Prophage_9630332 NC_001895 M gpM {Enterobacteria phage P2}	Prophage_9630332	0.502
608	ORF7_127	1014947	1015411	+	154	ORF7_127	Predicted ORF;Prophage|Prophage_33438903 NC_005056 similar to P2 L capsid completion protein {Enterobacteria phage WPhi}	Prophage_9630333	0.442
609	ORF7_128	1015411	1015614	+	67	ORF7_128	Predicted ORF;Prophage|Prophage_9630334 NC_001895 X gpX {Enterobacteria phage P2}	Prophage_9630334	0.582
611	ORF7_132	1016851	1017285	+	144	ORF7_132	Predicted ORF;Prophage|Prophage_33438910 NC_005056 similar to P2 R tail completion protein {Enterobacteria phage WPhi}	Prophage_9630339	0.493
612	ORF7_133	1017260	1017724	+	154	ORF7_133	Predicted ORF;Prophage|Prophage_30065717 NC_004745 S gpS {Yersinia phage L-413C}	Prophage_9634069	0.455
613	ORF7_134	1017805	1018365	+	186	ORF7_134	Predicted ORF;Prophage|Prophage_33438912 NC_005056 similar to P2 V baseplate protein {Enterobacteria phage WPhi}	Prophage_41057367	0.488
614	ORF7_135	1018362	1018709	+	115	ORF7_135	Predicted ORF;Prophage|Prophage_33438913 NC_005056 similar to P2 W putative baseplate protein {Enterobacteria phage WPhi}	Prophage_9634071	0.548
615	ORF7_136	1018709	1019617	+	302	ORF7_136	Predicted ORF;Prophage|Prophage_33438914 NC_005056 similar to P2 J putative baseplate assembly protein {Enterobacteria phage WPhi}	Prophage_9634072	0.659
616	ORF7_137	1019610	1020227	+	205	ORF7_137	Predicted ORF;Prophage|Prophage_30065721 NC_004745 I gpI {Yersinia phage L-413C}	Prophage_145708096	0.532
617	ORF7_140	1022317	1023489	+	390	ORF7_140	Predicted ORF;Prophage|Prophage_17313241 NC_003278 hypothetical protein {Pseudomonas phage phiCTX}	Prophage_41057373	0.678
618	ORF7_141	1023501	1024016	+	171	ORF7_141	Predicted ORF;Prophage|Prophage_33438920 NC_005056 similar to P2 FII tail tube {Enterobacteria phage WPhi}	Prophage_9634077	0.68
619	ORF7_142	1024077	1024421	+	114	ORF7_142	Predicted ORF;Prophage|Prophage_134288780 NC_009234 gp28 phage tail protein E {Burkholderia phage phiE202}	Prophage_134288708	0.456
620	ORF7_143	1024421	1024555	+	44	ORF7_143	Predicted ORF;Prophage|Prophage_9630352 NC_001895 E+E' gpE+E' {Enterobacteria phage P2}	Prophage_30065728	0.523
621	ORF7_145	1027232	1027696	+	154	ORF7_145	Predicted ORF;Prophage|Prophage_9630354 NC_001895 U gpU {Enterobacteria phage P2}	Prophage_41057377	0.535
622	ORF7_146	1027693	1028781	+	362	ORF7_146	Predicted ORF;Prophage|Prophage_33438925 NC_005056 similar to P2 D tail protein {Enterobacteria phage WPhi}	Prophage_9634082	0.569
623	ORF7_147	1028852	1029067	+	71	ORF7_147	Predicted ORF;Prophage|Prophage_9630356 NC_001895 ogr Ogr {Enterobacteria phage P2}	Prophage_30065732	0.521
642	ORF8_20	1060713	1061096	-	127	ORF8_20	Predicted ORF;Prophage|Prophage_9632845 NC_000866 vs.6 Vs.6 conserved hypothetical protein {Enterobacteria phage T4}	Prophage_32453604	0.567
654	ORF8_38	1079479	1079691	+	70	ORF8_38	Predicted ORF;Prophage|Prophage_13095918 NC_002671 Csp {Lactococcus phage bIL312}	Prophage_13095918	0.571
664	ORF8_50	1091575	1092369	+	264	ORF8_50	Predicted ORF;Prophage|Prophage_66392008 NC_007022 td dTMP (thymidylate) synthase {Aeromonas phage 31}	Prophage_148747783	0.705
823	ORF12_38	1305548	1306588	+	346	ORF12_38	Predicted ORF;Prophage|Prophage_61806048 NC_006883 hypothetical protein {Cyanophage P-SSM2}	Prophage_61806048	0.442
834	ORF12_56	1330857	1331774	+	305	ORF12_56	Predicted ORF;Prophage|Prophage_56692914 NC_006552 RdgC exonuclease {Pseudomonas phage F116}	Prophage_46401690	0.57
1050	ORF18_63	1687454	1687909	+	151	ORF18_63	Predicted ORF;Prophage|Prophage_38639933 NC_005260 hypothetical protein {Aeromonas phage Aeh1}	Prophage_84662702	0.603
1227	ORF19_206	1989024	1990034	-	336	ORF19_206	Predicted ORF;Prophage|Prophage_38707923 NC_005284 putative site-specific integrase similar to NP_536390 and NP_888206 {Burkholderia phage phi1026b}	Prophage_23505472	0.458
1245	ORF19_235	2015357	2015845	+	162	ORF19_235	Predicted ORF;Prophage|Prophage_30065713 NC_004745 K gpK {Yersinia phage L-413C}	Prophage_33438906	0.509
1246	ORF19_237	2016757	2018460	+	567	ORF19_237	Predicted ORF;Prophage|Prophage_32171001 NC_004913 hypothetical protein {Stx1 converting phage}	Prophage_116222005	0.633
1247	ORF19_238	2018460	2020589	+	709	ORF19_238	Predicted ORF;Prophage|Prophage_20065798 NC_003525 hypothetical protein {Stx2 converting phage I}	Prophage_32171003	0.573
1248	ORF19_240	2021890	2023107	+	405	ORF19_240	Predicted ORF;Prophage|Prophage_9632520 NC_000924 hypothetical protein {Enterobacteria phage 933W}	Prophage_116222008	0.617
1249	ORF19_242	2023645	2024073	+	142	ORF19_242	Predicted ORF;Prophage|Prophage_20065810 NC_003525 hypothetical protein {Stx2 converting phage I}	Prophage_32171015	0.424
1307	ORF22_14	2113670	2113942	+	90	ORF22_14	Predicted ORF;Prophage|Prophage_48696914 NC_005882 HU DNA binding protein {Burkholderia phage BcepMu}	Prophage_156564019	0.567
1377	ORF23_79	2227714	2227923	+	69	ORF23_79	Predicted ORF;Prophage|Prophage_13095918 NC_002671 Csp {Lactococcus phage bIL312}	Prophage_13095918	0.623
1428	ORF23_158	2305279	2305746	-	155	ORF23_158	Predicted ORF;Prophage|Prophage_66391723 NC_007023 nrdG NrdG anaerobic nucleotide reductase subunit {Enterobacteria phage RB43}	Prophage_116326297	0.439
1429	ORF23_159	2305968	2308088	-	706	ORF23_159	Predicted ORF;Prophage|Prophage_34419247 NC_005083 nrdD anaerobic NTP reductase large subunit {Vibrio phage KVP40}	Prophage_38639964	0.61
1475	ORF23_217	2371752	2371961	+	69	ORF23_217	Predicted ORF;Prophage|Prophage_9626273 NC_001416 int integration protein {Enterobacteria phage lambda}	Prophage_9634144	0.435
1844	ORF29_2	2984652	2985215	-	187	ORF29_2	Predicted ORF;Prophage|Prophage_17975181 NC_003309 putative tail component protein {Burkholderia phage phiE125}	Prophage_9626263	0.495
1846	ORF29_4	2985891	2986595	-	234	ORF29_4	Predicted ORF;Prophage|Prophage_134288683 NC_009235 gp18 phage minor tail protein L {Burkholderia phage phi644-2}	Prophage_9626261	0.47
1848	ORF29_9	2991135	2991605	-	156	ORF29_9	Predicted ORF;Prophage|Prophage_33770520 NC_005069 hypothetical protein {Yersinia phage PY54}	Prophage_33770520	0.538
1849	ORF29_11	2991989	2992411	-	140	ORF29_11	Predicted ORF;Prophage|Prophage_9635606 NC_002484 Orf14 {Pseudomonas phage D3}	Prophage_33770519	0.471
1851	ORF29_15	2993313	2994524	-	403	ORF29_15	Predicted ORF;Prophage|Prophage_32128421 NC_004902 head protein major capsid subunit precursor {Xanthomonas phage Xp10}	Prophage_9635591	0.474
1852	ORF29_16	2994540	2995397	-	285	ORF29_16	Predicted ORF;Prophage|Prophage_32128420 NC_004902 protease of the ClpP family {Xanthomonas phage Xp10}	Prophage_9635590	0.516
1853	ORF29_17	2995409	2996698	-	429	ORF29_17	Predicted ORF;Prophage|Prophage_148727185 NC_009543 head portal protein {Xanthomonas phage phiXo411}	Prophage_38707893	0.466
1854	ORF29_20	2998949	2999293	-	114	ORF29_20	Predicted ORF;Prophage|Prophage_22855043 NC_004167 hypothetical protein {Bacillus phage phi105}	Prophage_9634183	0.57
1858	ORF29_25	3001407	3001820	-	137	ORF29_25	Predicted ORF;Prophage|Prophage_157311403 NC_009821 hypothetical protein {Enterobacteria phage Phi1}	Prophage_157311403	0.467
1859	ORF29_26	3001820	3002140	-	106	ORF29_26	Predicted ORF;Prophage|Prophage_23505495 NC_004313 lysis protein (holin) {Enterobacteria phage ST64B}	Prophage_148727161	0.491
1863	ORF29_31	3005986	3006096	-	36	ORF29_31	Predicted ORF;Prophage|Prophage_33770568 NC_005069 60 DNA adenine-methylase {Yersinia phage PY54}	Prophage_9630519	0.667
1872	ORF29_43	3014811	3015365	-	184	ORF29_43	Predicted ORF;Prophage|Prophage_23505484 NC_004313 hypothetical protein {Enterobacteria phage ST64B}	Prophage_19549023	0.489
1877	ORF29_52	3021536	3021856	-	106	ORF29_52	Predicted ORF;Prophage|Prophage_23505495 NC_004313 lysis protein (holin) {Enterobacteria phage ST64B}	Prophage_148727161	0.519
1913	ORF30_36	3064394	3065404	-	336	ORF30_36	Predicted ORF;Prophage|Prophage_17313247 NC_003278 hypothetical protein {Pseudomonas phage phiCTX}	Prophage_126010876	0.446
1915	ORF30_44	3071844	3072275	-	143	ORF30_44	Predicted ORF;Prophage|Prophage_9626269 NC_001416 orf-194 Putative fiber assembly protein {Enterobacteria phage lambda}	Prophage_148727172	0.427
1916	ORF30_48	3075461	3075793	-	110	ORF30_48	Predicted ORF;Prophage|Prophage_72537704 NC_007145 phage baseplate assembly protein {Burkholderia phage phi52237}	Prophage_126010861	0.436
1918	ORF30_54	3078267	3079292	-	341	ORF30_54	Predicted ORF;Prophage|Prophage_34610166 NC_005091 capsid protein E {Burkholderia phage BcepNazgul}	Prophage_9630472	0.739
1919	ORF30_55	3079347	3079673	-	108	ORF30_55	Predicted ORF;Prophage|Prophage_9626250 NC_001416 D head-DNA stabilization protein {Enterobacteria phage lambda}	Prophage_9630471	0.537
1920	ORF30_56	3079683	3080990	-	435	ORF30_56	Predicted ORF;Prophage|Prophage_9626249 NC_001416 nu3 capsid assembly protein {Enterobacteria phage lambda}	Prophage_9626248	0.624
1921	ORF30_57	3080980	3082572	-	530	ORF30_57	Predicted ORF;Prophage|Prophage_34610170 NC_005091 portal protein Lambda B {Burkholderia phage BcepNazgul}	Prophage_9626247	0.728
1922	ORF30_58	3082569	3082772	-	67	ORF30_58	Predicted ORF;Prophage|Prophage_34610171 NC_005091 head-tail joining protein Lambda W {Burkholderia phage BcepNazgul}	Prophage_9630467	0.735
1923	ORF30_59	3082777	3084705	-	642	ORF30_59	Predicted ORF;Prophage|Prophage_148912767 NC_007805 Putative large subunit (GpA homolog) of DNA packaging dimer {Pseudomonas phage F10}	Prophage_9630466	0.777
1924	ORF30_60	3084677	3085186	-	169	ORF30_60	Predicted ORF;Prophage|Prophage_9626244 NC_001416 nu1 DNA packaging protein {Enterobacteria phage lambda}	Prophage_9630465	0.485
1927	ORF30_65	3087919	3088464	-	181	ORF30_65	Predicted ORF;Prophage|Prophage_19549031 NC_003444 unknown {Enterobacteria phage SfV}	Prophage_46358692	0.724
1929	ORF30_67	3089386	3089799	-	137	ORF30_67	Predicted ORF;Prophage|Prophage_33620489 NC_005066 hypothetical protein {Enterobacteria phage RB49}	Prophage_157311403	0.489
1930	ORF30_68	3089799	3090119	-	106	ORF30_68	Predicted ORF;Prophage|Prophage_23505495 NC_004313 lysis protein (holin) {Enterobacteria phage ST64B}	Prophage_148727161	0.509
1931	ORF30_69	3090241	3091278	-	345	ORF30_69	Predicted ORF;Prophage|Prophage_18249888 NC_003356 putative DNA methylase {Enterobacteria phage phiP27}	Prophage_46402138	0.67
1933	ORF30_71	3091835	3092341	-	168	ORF30_71	Predicted ORF;Prophage|Prophage_9633603 NC_000935 P5 {Acyrthosiphon pisum secondary endosymbiont phage 1}	Prophage_41057332	0.619
1938	ORF30_78	3095556	3095852	-	98	ORF30_78	Predicted ORF;Prophage|Prophage_32171125 NC_004914 cII CII protein {Stx2 converting phage II}	Prophage_9634198	0.551
1939	ORF30_79	3095965	3096171	-	68	ORF30_79	Predicted ORF;Prophage|Prophage_13559844 NC_002730 cro cro {Enterobacteria phage HK620}	Prophage_9634197	0.632
1940	ORF30_80	3096274	3096990	+	238	ORF30_80	Predicted ORF;Prophage|Prophage_13559843 NC_002730 cI repressor protein cI {Enterobacteria phage HK620}	Prophage_9626292	0.6
1945	ORF30_87	3101276	3101500	+	74	ORF30_87	Predicted ORF;Prophage|Prophage_9626274 NC_001416 xis Excisionase {Enterobacteria phage lambda}	Prophage_9634185	0.487
1946	ORF30_88	3101469	3102497	+	342	ORF30_88	Predicted ORF;Prophage|Prophage_9626273 NC_001416 int integration protein {Enterobacteria phage lambda}	Prophage_9634144	0.43
1967	ORF33_7	3144243	3144803	+	186	ORF33_7	Predicted ORF;Prophage|Prophage_62362261 NC_006949 48 putative bacterial type single strand DNA binding protein (ssb) {Enterobacteria phage ES18}	Prophage_46401640	0.571
2362	ORF70_3	3815561	3815893	-	110	ORF70_3	Predicted ORF	Prophage_116222017	0.479

## Sheet: ICE
VRprofile
Ha-values for the genes in the subject genome against the query databases
								ICE
No	Synonym	Start	End	Strand	Length(aa)	Gene	Product	Hit	Ha-value

[truncated: 10 more sheets: T3SS, T4SS, T6SS, Sheet3, T7SS, INTEGRON, IS, PAI, ARI, Sheet2]
