# Supplementary material for: Pathogenomics of Virulence Traits of Plesiomonas shigelloides That Were Deemed Inconclusive by Traditional Experimental Approaches
Source: Front Microbiol. 2018 Dec 21;9:3077. doi: 10.3389/fmicb.2018.03077 (PMC6309461; doi:10.3389/fmicb.2018.03077)
Supplement: Supplementary file 5 [file Data_Sheet_3.XLSX]

## Sheet: Sheet1
VRprofile
Ha-values for the genes in the subject genome against the query databases
No	Synonym	Start	End	Strand	Length(aa)	Gene	Product	VF		AR		T3SE		T4SE		T6SE		T7SE		Prophage		ICE		T3SS		T4SS		T6SS		T7SS		Integron		IS		PAI		ARI
								Hit	Ha-value	Hit	Ha-value	Hit	Ha-value	Hit	Ha-value	Hit	Ha-value	Hit	Ha-value	Hit	Ha-value	Hit	Ha-value	Hit	Ha-value	Hit	Ha-value	Hit	Ha-value	Hit	Ha-value	Hit	Ha-value	Hit	Ha-value	Hit	Ha-value	Hit	Ha-value
1	ORF1_14	17912	20017	-	701	-	Predicted ORF	VFG1263	0.515	-	-	-	-	-	-	-	-	-	-	-	-	-	-	-	-	-	-	-	-	-	-	-	-	-	-	-	-	-	-
2	ORF1_15	20029	21144	-	371	-	Predicted ORF	VFG1262	0.445	-	-	-	-	-	-	-	-	-	-	-	-	-	-	-	-	-	-	-	-	-	-	-	-	-	-	-	-	-	-
3	ORF1_16	21176	21967	-	263	-	Predicted ORF	VFG1261	0.456	-	-	-	-	-	-	-	-	-	-	-	-	-	-	-	-	-	-	-	-	-	-	-	-	-	-	-	-	-	-
4	ORF1_17	21981	22250	-	89	-	Predicted ORF	VFG1260	0.483	-	-	-	-	-	-	-	-	-	-	-	-	-	-	-	-	-	-	-	-	-	-	-	-	-	-	-	-	-	-
5	ORF1_18	22264	23001	-	245	-	Predicted ORF	VFG1259	0.571	-	-	-	-	-	-	-	-	-	-	-	-	-	-	-	-	-	-	-	-	-	-	-	-	-	-	-	-	-	-
6	ORF1_25	28576	29907	+	443	-	Predicted ORF	VFG1254	0.614	-	-	-	-	-	-	-	-	-	-	-	-	-	-	T3SS_SctN	0.44	-	-	-	-	-	-	-	-	-	-	-	-	-	-
7	ORF1_31	32677	33099	+	140	-	Predicted ORF	VFG1992	0.486	-	-	-	-	-	-	-	-	-	-	-	-	-	-	-	-	-	-	-	-	-	-	-	-	-	-	-	-	-	-
8	ORF1_34	35098	35823	+	241	-	Predicted ORF	VFG1239	0.433	-	-	-	-	-	-	-	-	-	-	-	-	-	-	-	-	-	-	-	-	-	-	-	-	-	-	-	-	-	-
9	ORF1_35	35835	36620	+	261	-	Predicted ORF	VFG1240	0.594	-	-	-	-	-	-	-	-	-	-	-	-	-	-	-	-	-	-	-	-	-	-	-	-	-	-	-	-	-	-
10	ORF1_36	36671	37330	+	219	-	Predicted ORF	VFG1241	0.47	-	-	-	-	-	-	-	-	-	-	-	-	-	-	-	-	-	-	-	-	-	-	-	-	-	-	-	-	-	-
11	ORF1_37	37339	38433	+	364	-	Predicted ORF	VFG1242	0.563	-	-	-	-	-	-	-	-	-	-	-	-	-	-	-	-	-	-	-	-	-	-	-	-	-	-	-	-	-	-
12	ORF1_90	97426	98352	+	308	-	Predicted ORF	-	-	-	-	-	-	-	-	-	-	-	-	-	-	-	-	-	-	-	-	-	-	-	-	-	-	-	-	-	-	ARI_484356542	0.438
13	ORF1_101	111034	114156	-	1040	-	Predicted ORF	-	-	AR_YP_001186705	0.47	-	-	-	-	-	-	-	-	-	-	-	-	-	-	-	-	-	-	-	-	-	-	-	-	-	-	-	-
14	ORF1_108	121244	122524	+	426	-	Predicted ORF	-	-	-	-	-	-	-	-	-	-	-	-	-	-	-	-	-	-	-	-	-	-	-	-	-	-	-	-	-	-	ARI_484359522	0.725
15	ORF1_109	122617	123642	+	341	-	Predicted ORF	-	-	-	-	-	-	-	-	-	-	-	-	-	-	-	-	-	-	-	-	-	-	-	-	-	-	-	-	-	-	ARI_587656393	0.736
16	ORF1_114	128478	129632	+	384	-	Predicted ORF	VFG0033	0.557	-	-	-	-	-	-	-	-	-	-	-	-	-	-	-	-	-	-	-	-	-	-	-	-	-	-	-	-	ARI_484356514	*
17	ORF1_115	129649	130239	+	196	-	Predicted ORF	VFG0032	0.531	-	-	-	-	-	-	-	-	-	-	-	-	-	-	-	-	-	-	-	-	-	-	-	-	-	-	-	-	ARI_484356525	*
18	ORF1_116	130254	132173	+	639	-	Predicted ORF	VFG0029	0.457	-	-	-	-	-	-	-	-	-	-	-	-	-	-	-	-	-	-	-	-	-	-	-	-	-	-	-	-	ARI_697403907	0.423
19	ORF1_133	152303	153682	+	459	-	Predicted ORF	-	-	-	-	-	-	-	-	-	-	-	-	-	-	-	-	-	-	-	-	-	-	-	-	-	-	-	-	PAI_AAO17231	0.691	-	-
20	ORF1_134	154006	155382	+	458	-	Predicted ORF	-	-	-	-	-	-	-	-	-	-	-	-	-	-	-	-	-	-	-	-	-	-	-	-	-	-	-	-	PAI_AAO17231	0.712	-	-
21	ORF1_198	227120	229174	+	684	-	Predicted ORF	VFG2047	0.658	-	-	-	-	-	-	-	-	-	-	-	-	-	-	-	-	-	-	-	-	-	-	-	-	-	-	PAI_CAE85234	0.665	-	-
22	ORF1_199	229171	230745	+	524	-	Predicted ORF	VFG2048	0.66	-	-	-	-	-	-	-	-	-	-	-	-	-	-	-	-	-	-	-	-	-	-	-	-	-	-	PAI_CAE85233	0.666	-	-
23	ORF1_200	230742	231965	+	407	-	Predicted ORF	VFG2049	0.609	-	-	-	-	-	-	-	-	-	-	-	-	-	-	-	-	-	-	-	-	-	-	-	-	-	-	PAI_CAE85232	0.636	-	-
24	ORF1_201	232016	232474	+	152	-	Predicted ORF	VFG2050	0.71	-	-	-	-	-	-	-	-	-	-	-	-	-	-	-	-	-	-	-	-	-	-	-	-	-	-	PAI_CAE85231	0.71	-	-
25	ORF1_212	240743	243244	-	833	-	Predicted ORF	-	-	AR_YP_001290033	0.54	-	-	-	-	-	-	-	-	-	-	-	-	-	-	-	-	-	-	-	-	-	-	-	-	-	-	-	-
26	ORF1_235	269876	270904	-	342	-	Predicted ORF	-	-	-	-	-	-	-	-	-	-	-	-	-	-	-	-	-	-	-	-	-	-	-	-	-	-	ISSm4_PEP2	0.532	-	-	-	-
27	ORF1_247	283533	284843	+	436	-	Predicted ORF	-	-	-	-	-	-	-	-	-	-	-	-	-	-	-	-	-	-	-	-	-	-	-	-	-	-	-	-	PAI_CAA21341	0.571	ARI_12698391	*
28	ORF1_248	284853	285872	+	339	-	Predicted ORF	-	-	-	-	-	-	-	-	-	-	-	-	-	-	-	-	-	-	-	-	-	-	-	-	-	-	-	-	PAI_CAA21340	0.468	-	-
29	ORF1_249	285903	287366	+	487	-	Predicted ORF	-	-	-	-	-	-	-	-	-	-	-	-	-	-	-	-	-	-	-	-	-	-	-	-	-	-	-	-	PAI_CAA21339	0.563	ARI_12698392	*
30	ORF1_346	374297	375268	-	323	-	Predicted ORF	VFG1971	0.452	-	-	-	-	-	-	-	-	-	-	-	-	-	-	-	-	-	-	-	-	-	-	-	-	-	-	PAI_AAZ04466	*	-	-
31	ORF1_393	419583	420443	-	286	-	Predicted ORF	VFG0114	0.444	-	-	-	-	-	-	-	-	-	-	-	-	-	-	-	-	-	-	-	-	-	-	-	-	-	-	PAI_CAE85237	0.451	-	-
32	ORF1_396	422574	423809	-	411	-	Predicted ORF	VFG1881	0.431	-	-	-	-	-	-	-	-	-	-	-	-	-	-	-	-	-	-	-	-	-	-	-	-	-	-	-	-	-	-
33	ORF1_397	423811	425316	-	501	-	Predicted ORF	VFG0112	0.521	-	-	-	-	-	-	-	-	-	-	-	-	-	-	-	-	-	-	-	-	-	-	-	-	-	-	-	-	-	-
34	ORF1_398	425372	425830	-	152	-	Predicted ORF	VFG0111	0.468	-	-	-	-	-	-	-	-	-	-	-	-	-	-	-	-	-	-	-	-	-	-	-	-	-	-	-	-	-	-
35	ORF1_401	428659	429501	+	280	-	Predicted ORF	-	-	CBMAR_Q545Z2	0.461	-	-	-	-	-	-	-	-	-	-	-	-	-	-	-	-	-	-	-	-	-	-	-	-	-	-	-	-
36	ORF1_413	446596	447933	+	445	-	Predicted ORF	-	-	AR_ZP_02900740	0.528	-	-	-	-	-	-	-	-	-	-	-	-	-	-	-	-	-	-	-	-	-	-	-	-	-	-	-	-
37	ORF1_421	461202	462272	+	356	-	Predicted ORF	VFG1443	0.539	-	-	-	-	-	-	-	-	-	-	-	-	-	-	-	-	-	-	-	-	-	-	-	-	-	-	PAI_149774748	*	-	-
38	ORF1_427	467733	468113	-	126	-	Predicted ORF	VFG1416	0.444	-	-	-	-	-	-	-	-	-	-	-	-	-	-	-	-	-	-	-	-	-	-	-	-	-	-	-	-	-	-
39	ORF1_428	468262	469116	-	284	-	Predicted ORF	VFG1417	0.451	-	-	-	-	-	-	-	-	-	-	-	-	-	-	-	-	-	-	-	-	-	-	-	-	-	-	-	-	-	-
40	ORF1_449	493174	493980	+	268	-	Predicted ORF	-	-	AR_YP_001140148	0.745	-	-	-	-	-	-	-	-	-	-	-	-	-	-	-	-	-	-	-	-	-	-	-	-	-	-	-	-
41	ORF1_454	499383	500648	-	421	-	Predicted ORF	-	-	-	-	-	-	T4SE_29653378	0.584	-	-	-	-	-	-	-	-	-	-	-	-	-	-	-	-	-	-	-	-	-	-	-	-
42	ORF1_462	511797	513227	+	476	-	Predicted ORF	VFG0331	0.676	-	-	-	-	-	-	-	-	-	-	Prophage_61806181	*	-	-	-	-	-	-	-	-	-	-	-	-	-	-	-	-	-	-
43	ORF1_519	590088	590846	-	252	-	Predicted ORF	-	-	CBMAR_A4FI79	*	-	-	-	-	-	-	-	-	-	-	-	-	-	-	-	-	-	-	-	-	-	-	-	-	PAI_AAO17226	0.468	ARI_6332763	*
44	ORF1_520	591012	591356	+	114	-	Predicted ORF	-	-	-	-	-	-	-	-	-	-	-	-	-	-	-	-	-	-	-	-	-	-	-	-	-	-	-	-	PAI_AAO17225	0.456	-	-
45	ORF1_522	591728	592195	-	155	-	Predicted ORF	-	-	-	-	-	-	-	-	-	-	-	-	Prophage_82701057	0.452	-	-	-	-	-	-	-	-	-	-	-	-	-	-	PAI_AAO17224	0.716	-	-
46	ORF1_523	592250	592981	+	243	-	Predicted ORF	-	-	-	-	-	-	-	-	-	-	-	-	Prophage_126010887	*	-	-	-	-	-	-	-	-	-	-	-	-	-	-	PAI_AAO17223	0.757	-	-
47	ORF1_527	598922	599503	+	193	-	Predicted ORF	VFG2026	0.42	-	-	-	-	-	-	-	-	-	-	-	-	-	-	-	-	-	-	-	-	-	-	-	-	-	-	-	-	-	-
48	ORF1_532	604455	605765	+	436	-	Predicted ORF	VFG1381	0.58	-	-	-	-	-	-	-	-	-	-	-	-	-	-	-	-	-	-	-	-	-	-	-	-	-	-	-	-	-	-
49	ORF1_536	607776	608822	+	348	-	Predicted ORF	-	-	-	-	-	-	-	-	-	-	-	-	-	-	-	-	-	-	-	-	-	-	-	-	-	-	-	-	PAI_AAF71483	0.695	-	-
50	ORF1_544	616213	617427	+	404	-	Predicted ORF	-	-	-	-	-	-	-	-	-	-	-	-	-	-	-	-	-	-	-	-	-	-	-	-	-	-	-	-	PAI_ABP49156	0.421	-	-
51	ORF1_576	655139	656392	+	417	-	Predicted ORF	-	-	-	-	-	-	-	-	-	-	-	-	Prophage_37651489	0.482	-	-	-	-	-	-	-	-	-	-	-	-	-	-	-	-	-	-
52	ORF1_588	677319	678233	-	304	-	Predicted ORF	-	-	-	-	-	-	-	-	-	-	-	-	Prophage_46401690	0.533	-	-	-	-	-	-	-	-	-	-	-	-	-	-	-	-	-	-
53	ORF1_605	691485	691805	+	106	-	Predicted ORF	-	-	-	-	-	-	-	-	-	-	-	-	Prophage_148727161	0.509	-	-	-	-	-	-	-	-	-	-	-	-	-	-	-	-	-	-
54	ORF1_606	691805	692218	+	137	-	Predicted ORF	-	-	-	-	-	-	-	-	-	-	-	-	Prophage_18249894	0.467	-	-	-	-	-	-	-	-	-	-	-	-	-	-	PAI_CAI77378	0.526	-	-
55	ORF1_608	692729	692920	+	63	-	Predicted ORF	-	-	-	-	-	-	-	-	-	-	-	-	Prophage_9630521	0.619	-	-	-	-	-	-	-	-	-	-	-	-	-	-	-	-	-	-
56	ORF1_609	693065	693409	+	114	-	Predicted ORF	-	-	-	-	-	-	-	-	-	-	-	-	Prophage_9634183	0.553	-	-	-	-	-	-	-	-	-	-	-	-	-	-	-	-	-	-
57	ORF1_612	695660	696949	+	429	-	Predicted ORF	-	-	-	-	-	-	-	-	-	-	-	-	Prophage_38707893	0.464	-	-	-	-	-	-	-	-	-	-	-	-	-	-	-	-	-	-
58	ORF1_613	696961	697818	+	285	-	Predicted ORF	-	-	-	-	-	-	-	-	-	-	-	-	Prophage_9635590	0.512	-	-	-	-	-	-	-	-	-	-	-	-	-	-	-	-	-	-
59	ORF1_614	697834	699051	+	405	-	Predicted ORF	-	-	-	-	-	-	-	-	-	-	-	-	Prophage_9635591	0.474	-	-	-	-	-	-	-	-	-	-	-	-	-	-	-	-	-	-
60	ORF1_617	700037	700459	+	140	-	Predicted ORF	-	-	-	-	-	-	-	-	-	-	-	-	Prophage_33770519	0.471	-	-	-	-	-	-	-	-	-	-	-	-	-	-	-	-	-	-
61	ORF1_619	700846	701313	+	155	-	Predicted ORF	-	-	-	-	-	-	-	-	-	-	-	-	Prophage_33770520	0.555	-	-	-	-	-	-	-	-	-	-	-	-	-	-	-	-	-	-
62	ORF1_620	701325	701663	+	112	-	Predicted ORF	-	-	-	-	-	-	-	-	-	-	-	-	Prophage_46402099	0.424	-	-	-	-	-	-	-	-	-	-	-	-	-	-	-	-	-	-
63	ORF1_623	705872	706576	+	234	-	Predicted ORF	-	-	-	-	-	-	-	-	-	-	-	-	Prophage_62362239	0.466	-	-	-	-	-	-	-	-	-	-	-	-	-	-	-	-	-	-
64	ORF1_624	706583	707314	+	243	-	Predicted ORF	-	-	-	-	-	-	-	-	-	-	-	-	Prophage_62362240	0.44	-	-	-	-	-	-	-	-	-	-	-	-	-	-	-	-	-	-
65	ORF1_625	707266	707814	+	182	-	Predicted ORF	-	-	-	-	-	-	-	-	-	-	-	-	Prophage_9626263	0.508	-	-	-	-	-	-	-	-	-	-	-	-	-	-	-	-	-	-
66	ORF1_635	726314	727231	-	305	-	Predicted ORF	-	-	-	-	-	-	-	-	-	-	-	-	Prophage_46401690	0.57	-	-	-	-	-	-	-	-	-	-	-	-	-	-	-	-	-	-
67	ORF1_653	751474	752514	-	346	-	Predicted ORF	-	-	-	-	-	-	-	-	-	-	-	-	Prophage_61806048	0.445	-	-	-	-	-	-	-	-	-	-	-	-	-	-	-	-	-	-
68	ORF1_659	757219	757566	-	115	-	Predicted ORF	-	-	-	-	-	-	-	-	-	-	-	-	-	-	-	-	-	-	-	-	-	-	-	-	-	-	-	-	-	-	ARI_672940412	0.435
69	ORF1_692	801481	803616	-	711	-	Predicted ORF	VFG1670	0.655	-	-	-	-	-	-	-	-	-	-	-	-	-	-	-	-	-	-	-	-	-	-	-	-	-	-	PAI_CAD66195	0.655	-	-
70	ORF1_706	823854	824336	+	160	-	Predicted ORF	-	-	-	-	-	-	-	-	-	-	-	-	-	-	-	-	-	-	-	-	T6SS_50122368_TssB	0.825	-	-	-	-	-	-	-	-	-	-
71	ORF1_707	824366	825844	+	492	-	Predicted ORF	-	-	-	-	-	-	-	-	-	-	-	-	-	-	-	-	-	-	-	-	T6SS_50122367_TssC	0.927	-	-	-	-	-	-	-	-	-	-
72	ORF1_708	825850	826281	+	143	-	Predicted ORF	-	-	-	-	-	-	-	-	-	-	-	-	-	-	-	-	-	-	-	-	T6SS_50122366_TssE	0.769	-	-	-	-	-	-	PAI_ABG57137	0.783	-	-
73	ORF1_709	826288	828060	+	590	-	Predicted ORF	VFG2078	0.538	-	-	-	-	-	-	-	-	-	-	-	-	-	-	-	-	-	-	T6SS_50122365_TssF	0.842	-	-	-	-	-	-	PAI_ABG57138	0.839	-	-
74	ORF1_710	828024	829022	+	332	-	Predicted ORF	-	-	-	-	-	-	-	-	-	-	-	-	-	-	-	-	-	-	-	-	T6SS_50122364_TssG	0.771	-	-	-	-	-	-	PAI_ABG57139	0.792	-	-
75	ORF1_711	829025	830266	+	413	-	Predicted ORF	VFG2080	*	-	-	-	-	-	-	-	-	-	-	-	-	-	-	-	-	-	-	-	-	-	-	-	-	-	-	PAI_ABG57140	0.671	-	-
76	ORF1_712	830266	830781	+	171	-	Predicted ORF	-	-	-	-	-	-	-	-	-	-	-	-	-	-	-	-	-	-	-	-	T6SS_50122362_TssJ	0.725	-	-	-	-	-	-	PAI_ABG57141	0.825	-	-
77	ORF1_713	830784	832124	+	446	-	Predicted ORF	VFG2082	0.619	-	-	-	-	-	-	-	-	-	-	-	-	-	-	-	-	-	-	T6SS_50122361_TssK	0.874	-	-	-	-	-	-	PAI_ABG57142	0.908	-	-
78	ORF1_714	832133	832909	+	258	-	Predicted ORF	-	-	-	-	-	-	-	-	-	-	-	-	-	-	-	-	-	-	-	-	T6SS_50122360_TssL	0.733	-	-	-	-	-	-	PAI_ABG57143	0.74	-	-
79	ORF1_715	832927	835533	+	868	-	Predicted ORF	-	-	-	-	-	-	-	-	-	-	-	-	-	-	-	-	-	-	-	-	T6SS_50122359_TssH	0.788	-	-	-	-	-	-	PAI_ABG57144	0.817	-	-
80	ORF1_716	835536	837077	+	513	-	Predicted ORF	VFG2085	*	-	-	-	-	-	-	-	-	-	-	-	-	-	-	-	-	-	-	-	-	-	-	-	-	-	-	PAI_ABG57145	0.659	-	-
81	ORF1_717	837074	837682	+	202	-	Predicted ORF	VFG2086	*	-	-	-	-	-	-	-	-	-	-	-	-	-	-	-	-	-	-	-	-	-	-	-	-	-	-	PAI_ABG57146	0.505	-	-
82	ORF1_718	837691	839112	+	473	-	Predicted ORF	-	-	-	-	-	-	-	-	-	-	-	-	-	-	-	-	-	-	-	-	T6SS_50122356_TssA	0.586	-	-	-	-	-	-	PAI_ABG57147	0.61	-	-
83	ORF1_719	839138	842635	+	1165	-	Predicted ORF	-	-	-	-	-	-	-	-	-	-	-	-	-	-	-	-	-	-	-	-	T6SS_50122355_TssM	0.682	-	-	-	-	-	-	PAI_ABG57148	0.734	-	-
84	ORF1_720	842682	844094	+	470	-	Predicted ORF	-	-	-	-	-	-	-	-	-	-	-	-	-	-	-	-	-	-	-	-	T6SS_50122354_TssA	0.618	-	-	-	-	-	-	PAI_ABG57149	0.703	-	-
85	ORF1_721	844135	844422	+	95	-	Predicted ORF	-	-	-	-	-	-	-	-	-	-	-	-	-	-	-	-	-	-	-	-	-	-	-	-	-	-	-	-	PAI_ABG57150	0.884	-	-
86	ORF1_722	844450	846480	+	676	-	Predicted ORF	-	-	-	-	-	-	-	-	T6SE_ABG57151	0.716	-	-	-	-	-	-	-	-	-	-	-	-	-	-	-	-	-	-	PAI_ABG57151	0.716	-	-
87	ORF1_725	850140	851606	+	488	-	Predicted ORF	VFG0594	0.678	-	-	-	-	-	-	-	-	-	-	-	-	-	-	-	-	-	-	-	-	-	-	-	-	-	-	-	-	-	-
88	ORF1_733	860786	861730	-	314	-	Predicted ORF	VFG1105	0.42	-	-	-	-	-	-	-	-	-	-	-	-	-	-	-	-	-	-	-	-	-	-	-	-	-	-	-	-	-	-
89	ORF1_740	866576	868702	+	708	-	Predicted ORF	VFG2047	0.709	-	-	-	-	-	-	-	-	-	-	-	-	-	-	-	-	-	-	-	-	-	-	-	-	-	-	PAI_CAE85234	0.718	-	-
90	ORF1_741	868695	870284	+	529	-	Predicted ORF	VFG2048	0.705	-	-	-	-	-	-	-	-	-	-	-	-	-	-	-	-	-	-	-	-	-	-	-	-	-	-	PAI_CAE85233	0.711	-	-
91	ORF1_742	870290	871564	+	424	-	Predicted ORF	VFG2049	0.663	-	-	-	-	-	-	-	-	-	-	-	-	-	-	-	-	-	-	-	-	-	-	-	-	-	-	PAI_CAE85232	0.681	-	-
92	ORF1_743	871613	872071	+	152	-	Predicted ORF	VFG2050	0.691	-	-	-	-	-	-	-	-	-	-	-	-	-	-	-	-	-	-	-	-	-	-	-	-	-	-	PAI_CAE85231	0.697	-	-
93	ORF1_746	873142	873774	+	210	-	Predicted ORF	VFG2053	0.481	-	-	-	-	-	-	-	-	-	-	-	-	-	-	-	-	-	-	-	-	-	-	-	-	-	-	PAI_CAE85228	0.476	-	-
94	ORF1_747	873771	874946	+	391	-	Predicted ORF	VFG2054	0.427	-	-	-	-	-	-	-	-	-	-	-	-	-	-	-	-	-	-	-	-	-	-	-	-	-	-	PAI_CAE85227	0.427	-	-
95	ORF1_752	882267	885320	+	1017	-	Predicted ORF	VFG0846	0.514	-	-	-	-	-	-	-	-	-	-	-	-	-	-	-	-	-	-	-	-	-	-	-	-	-	-	PAI_AAK20777	*	-	-
96	ORF1_754	889356	890375	+	339	-	Predicted ORF	-	-	-	-	-	-	-	-	-	-	-	-	-	-	-	-	-	-	-	-	-	-	-	-	-	-	-	-	PAI_CAA21362	0.829	-	-
97	ORF1_755	890456	892096	+	546	-	Predicted ORF	-	-	AR_NP_733568	*	-	-	-	-	-	-	-	-	-	-	-	-	-	-	-	-	-	-	-	-	-	-	-	-	PAI_CAA21361	0.87	-	-
98	ORF1_771	910712	912073	-	453	-	Predicted ORF	VFG1050	0.618	-	-	-	-	-	-	-	-	-	-	-	-	-	-	-	-	-	-	-	-	-	-	-	-	-	-	PAI_AAL08459	0.618	ARI_15808730	0.618
99	ORF1_772	912208	913479	-	423	-	Predicted ORF	-	-	-	-	-	-	-	-	-	-	-	-	Prophage_9630142	*	-	-	-	-	-	-	-	-	-	-	-	-	-	-	PAI_CAI36137	0.449	-	-
100	ORF1_786	924918	925328	+	136	-	Predicted ORF	VFG2351	0.449	-	-	-	-	-	-	-	-	-	-	-	-	-	-	-	-	-	-	-	-	-	-	-	-	-	-	-	-	-	-
101	ORF1_787	925331	925744	+	137	-	Predicted ORF	VFG1236	0.548	-	-	-	-	-	-	-	-	-	-	-	-	-	-	-	-	-	-	-	-	-	-	-	-	-	-	-	-	-	-
102	ORF1_790	928267	929013	+	248	-	Predicted ORF	VFG1239	0.506	-	-	-	-	-	-	-	-	-	-	-	-	-	-	-	-	-	-	-	-	-	-	-	-	-	-	-	-	-	-
103	ORF1_791	929067	929855	+	262	-	Predicted ORF	VFG1240	0.53	-	-	-	-	-	-	-	-	-	-	-	-	-	-	-	-	-	-	-	-	-	-	-	-	-	-	-	-	-	-
104	ORF1_792	929855	930967	+	370	-	Predicted ORF	VFG1242	0.57	-	-	-	-	-	-	-	-	-	-	-	-	-	-	-	-	-	-	-	-	-	-	-	-	-	-	-	-	-	-
105	ORF1_794	931975	932667	+	230	-	Predicted ORF	VFG1241	0.439	-	-	-	-	-	-	-	-	-	-	-	-	-	-	-	-	-	-	-	-	-	-	-	-	-	-	-	-	-	-
106	ORF1_798	938376	939431	-	351	-	Predicted ORF	VFG0311	0.45	-	-	-	-	-	-	-	-	-	-	-	-	-	-	-	-	-	-	-	-	-	-	-	-	-	-	-	-	ARI_484356518	0.635
107	ORF1_801	940964	941656	-	230	-	Predicted ORF	VFG0310	*	-	-	-	-	-	-	-	-	-	-	-	-	-	-	-	-	-	-	-	-	-	-	-	-	-	-	-	-	ARI_484356515	0.613
108	ORF1_802	941653	942825	-	390	-	Predicted ORF	VFG0033	*	-	-	-	-	-	-	-	-	-	-	-	-	-	-	-	-	-	-	-	-	-	-	-	-	-	-	-	-	ARI_484356514	0.649
109	ORF1_803	942829	943827	-	332	-	Predicted ORF	VFG1301	*	-	-	-	-	-	-	-	-	-	-	-	-	-	-	-	-	-	-	-	-	-	-	-	-	-	-	-	-	ARI_484356513	0.798
110	ORF1_809	948278	949807	+	509	-	Predicted ORF	VFG1248	0.503	-	-	-	-	-	-	-	-	-	-	-	-	-	-	-	-	-	-	-	-	-	-	-	-	-	-	-	-	-	-
111	ORF1_811	952387	952710	+	107	-	Predicted ORF	VFG1250	0.467	-	-	-	-	-	-	-	-	-	-	-	-	-	-	-	-	-	-	-	-	-	-	-	-	-	-	-	-	-	-
112	ORF1_813	954427	955455	+	342	-	Predicted ORF	VFG1252	0.559	-	-	-	-	-	-	-	-	-	-	-	-	-	-	-	-	-	-	-	-	-	-	-	-	-	-	-	-	-	-
113	ORF1_815	956427	957746	+	439	-	Predicted ORF	VFG1254	0.58	-	-	-	-	-	-	-	-	-	-	-	-	-	-	T3SS_BscN	0.451	-	-	-	-	-	-	-	-	-	-	-	-	-	-
114	ORF1_819	960466	961509	+	347	-	Predicted ORF	VFG1256	0.559	-	-	-	-	-	-	-	-	-	-	-	-	-	-	-	-	-	-	-	-	-	-	-	-	-	-	-	-	-	-
115	ORF1_820	961502	961897	+	131	-	Predicted ORF	VFG1257	0.634	-	-	-	-	-	-	-	-	-	-	-	-	-	-	-	-	-	-	-	-	-	-	-	-	-	-	-	-	-	-
116	ORF1_822	962319	963104	+	261	-	Predicted ORF	VFG1259	0.59	-	-	-	-	-	-	-	-	-	-	-	-	-	-	-	-	-	-	-	-	-	-	-	-	-	-	-	-	-	-
117	ORF1_823	963233	963502	+	89	-	Predicted ORF	VFG1260	0.517	-	-	-	-	-	-	-	-	-	-	-	-	-	-	-	-	-	-	-	-	-	-	-	-	-	-	-	-	-	-
118	ORF1_825	964355	965488	+	377	-	Predicted ORF	VFG1262	0.492	-	-	-	-	-	-	-	-	-	-	-	-	-	-	-	-	-	-	-	-	-	-	-	-	-	-	-	-	-	-
119	ORF1_826	965682	967778	+	698	-	Predicted ORF	VFG1263	0.647	-	-	-	-	-	-	-	-	-	-	-	-	-	-	-	-	-	-	-	-	-	-	-	-	-	-	-	-	-	-
120	ORF1_828	969370	970260	+	296	-	Predicted ORF	VFG1265	0.534	-	-	-	-	-	-	-	-	-	-	-	-	-	-	-	-	-	-	-	-	-	-	-	-	-	-	-	-	ARI_484359519	*
121	ORF1_829	970253	970975	+	240	-	Predicted ORF	VFG2010	0.562	-	-	-	-	-	-	-	-	-	-	-	-	-	-	-	-	-	-	-	-	-	-	-	-	-	-	-	-	-	-
122	ORF1_862	1014424	1015524	+	366	-	Predicted ORF	-	-	-	-	-	-	-	-	-	-	-	-	-	-	-	-	-	-	-	-	-	-	-	-	-	-	-	-	PAI_ABW69089	0.779	-	-
123	ORF1_869	1021967	1022767	+	266	-	Predicted ORF	-	-	-	-	-	-	-	-	-	-	-	-	-	-	-	-	-	-	-	-	-	-	-	-	-	-	-	-	PAI_ABW69077	0.598	-	-
124	ORF1_914	1072750	1073421	+	223	-	Predicted ORF	VFG0473	0.422	AR_NP_815956	*	-	-	-	-	-	-	-	-	-	-	-	-	-	-	-	-	-	-	-	-	-	-	-	-	-	-	-	-
125	ORF1_923	1086681	1088282	+	533	-	Predicted ORF	-	-	-	-	-	-	-	-	-	-	-	-	-	-	-	-	-	-	-	-	-	-	-	-	-	-	-	-	PAI_AAO17183	0.537	ARI_12698392	*
126	ORF1_930	1096783	1099497	-	904	-	Predicted ORF	VFG0574	0.524	-	-	-	-	-	-	-	-	-	-	-	-	-	-	-	-	-	-	-	-	-	-	-	-	-	-	-	-	ARI_24461619	*
127	ORF1_932	1101142	1101621	+	159	-	Predicted ORF	-	-	-	-	-	-	-	-	-	-	-	-	-	-	-	-	-	-	-	-	-	-	-	-	-	-	-	-	-	-	ARI_484359517	0.503
128	ORF1_985	1172922	1173425	+	167	-	Predicted ORF	VFG0087	0.455	-	-	-	-	-	-	-	-	-	-	-	-	-	-	-	-	-	-	-	-	-	-	-	-	-	-	PAI_AAK20781	0.455	-	-
129	ORF1_1015	1209744	1210952	+	402	-	Predicted ORF	-	-	AR_YP_002850162	0.555	-	-	-	-	-	-	-	-	-	-	-	-	-	-	-	-	-	-	-	-	-	-	-	-	-	-	-	-
130	ORF1_1053	1251234	1251893	+	219	-	Predicted ORF	VFG0473	0.42	-	-	-	-	-	-	-	-	-	-	-	-	-	-	-	-	-	-	-	-	-	-	-	-	-	-	-	-	-	-
131	ORF1_1071	1270001	1271770	+	589	-	Predicted ORF	-	-	-	-	-	-	-	-	-	-	-	-	-	-	-	-	-	-	-	-	-	-	-	-	-	-	-	-	-	-	ARI_484356532	0.582
132	ORF1_1136	1342443	1343087	+	214	-	Predicted ORF	VFG1889	0.495	-	-	-	-	-	-	-	-	-	-	-	-	-	-	-	-	-	-	-	-	-	-	-	-	-	-	-	-	-	-
133	ORF1_1157	1364928	1365986	+	352	-	Predicted ORF	VFG1630	0.429	-	-	-	-	-	-	-	-	-	-	-	-	-	-	-	-	-	-	-	-	-	-	-	-	-	-	PAI_CAC43413	0.429	-	-
134	ORF1_1162	1371460	1373595	-	711	-	Predicted ORF	VFG1670	0.631	-	-	-	-	-	-	-	-	-	-	-	-	-	-	-	-	-	-	-	-	-	-	-	-	-	-	PAI_CAD66195	0.631	-	-
135	ORF1_1163	1373666	1374988	-	440	-	Predicted ORF	VFG1671	0.643	-	-	-	-	-	-	-	-	-	-	-	-	-	-	-	-	-	-	-	-	-	-	-	-	-	-	PAI_CAD66196	0.643	-	-
136	ORF1_1174	1387912	1388664	+	250	-	Predicted ORF	-	-	-	-	-	-	-	-	-	-	-	-	-	-	-	-	-	-	-	-	-	-	-	-	-	-	-	-	PAI_CAE85213	0.468	-	-
137	ORF1_1198	1419072	1421534	+	820	-	Predicted ORF	-	-	-	-	-	-	-	-	-	-	-	-	-	-	-	-	-	-	-	-	-	-	-	-	-	-	-	-	-	-	ARI_24461619	0.429
138	ORF1_1221	1444447	1444674	-	75	-	Predicted ORF	-	-	-	-	-	-	-	-	-	-	-	-	Prophage_13095918	0.467	-	-	-	-	-	-	-	-	-	-	-	-	-	-	PAI_AAO18076	0.507	-	-
139	ORF1_1229	1453692	1454648	-	318	-	Predicted ORF	-	-	-	-	-	-	-	-	-	-	-	-	-	-	-	-	-	-	-	-	-	-	-	-	-	-	-	-	-	-	ARI_672940407	0.676
140	ORF1_1262	1492633	1493289	+	218	-	Predicted ORF	-	-	-	-	-	-	-	-	-	-	-	-	Prophage_34419356	0.528	-	-	-	-	-	-	-	-	-	-	-	-	-	-	-	-	-	-
141	ORF1_1269	1501082	1501915	-	277	-	Predicted ORF	VFG0462	0.653	-	-	-	-	-	-	-	-	-	-	-	-	-	-	-	-	-	-	-	-	-	-	-	-	-	-	-	-	-	-
142	ORF1_1270	1501933	1502334	-	133	-	Predicted ORF	VFG0461	0.459	-	-	-	-	-	-	-	-	-	-	-	-	-	-	-	-	-	-	-	-	-	-	-	-	-	-	-	-	-	-
143	ORF1_1271	1502345	1502752	-	135	-	Predicted ORF	VFG0460	0.444	-	-	-	-	-	-	-	-	-	-	-	-	-	-	-	-	-	-	-	-	-	-	-	-	-	-	-	-	-	-
144	ORF1_1283	1515702	1516442	+	246	-	Predicted ORF	VFG2009	0.435	-	-	-	-	-	-	-	-	-	-	-	-	-	-	-	-	-	-	-	-	-	-	-	-	-	-	-	-	-	-
145	ORF1_1294	1530720	1531337	+	205	-	Predicted ORF	-	-	AR_YP_001373621	*	-	-	-	-	-	-	-	-	-	-	-	-	-	-	-	-	-	-	-	-	-	-	-	-	-	-	ARI_24461540	0.439
146	ORF1_1295	1531344	1532003	+	219	-	Predicted ORF	-	-	-	-	-	-	-	-	-	-	-	-	-	-	-	-	-	-	-	-	-	-	-	-	-	-	-	-	-	-	ARI_24461539	0.498
147	ORF1_1296	1532341	1533114	+	257	-	Predicted ORF	VFG1856	0.479	-	-	-	-	-	-	-	-	-	-	-	-	-	-	-	-	-	-	-	-	-	-	-	-	-	-	-	-	ARI_24461538	0.451
148	ORF1_1299	1533853	1535820	+	655	-	Predicted ORF	-	-	-	-	-	-	-	-	-	-	-	-	-	-	-	-	-	-	-	-	-	-	-	-	-	-	-	-	-	-	ARI_24461535	0.527
149	ORF1_1309	1547775	1548746	-	323	-	Predicted ORF	-	-	-	-	-	-	-	-	-	-	-	-	-	-	-	-	-	-	-	-	-	-	-	-	-	-	-	-	PAI_208972754	0.464	ARI_481190489	0.433
150	ORF1_1378	1619416	1619913	-	165	-	Predicted ORF	-	-	-	-	-	-	-	-	-	-	-	-	-	-	-	-	-	-	-	-	-	-	-	-	-	-	-	-	PAI_AAO17212	0.424	-	-
151	ORF1_1380	1620485	1620895	+	136	-	Predicted ORF	-	-	-	-	-	-	-	-	-	-	-	-	-	-	-	-	-	-	-	-	-	-	-	-	-	-	-	-	PAI_AAO18063	0.581	-	-
152	ORF1_1393	1633334	1633978	+	214	-	Predicted ORF	-	-	AR_YP_002382193	0.458	-	-	-	-	-	-	-	-	-	-	-	-	-	-	-	-	-	-	-	-	-	-	-	-	PAI_CAA21355	0.463	-	-
153	ORF1_1397	1638074	1640251	-	725	-	Predicted ORF	VFG1862	0.772	-	-	-	-	-	-	-	-	-	-	-	-	-	-	-	-	-	-	-	-	-	-	-	-	-	-	-	-	-	-
154	ORF1_1400	1641893	1642792	+	299	-	Predicted ORF	-	-	CBMAR_K2W2I4	0.485	-	-	-	-	-	-	-	-	-	-	-	-	-	-	-	-	-	-	-	-	-	-	-	-	-	-	-	-
155	ORF1_1432	1678460	1679335	-	291	-	Predicted ORF	VFG0925	0.443	-	-	-	-	-	-	-	-	-	-	-	-	-	-	-	-	-	-	-	-	-	-	-	-	-	-	PAI_AAL08451	0.426	ARI_15808722	0.426
156	ORF1_1453	1703919	1704128	+	69	-	Predicted ORF	-	-	-	-	-	-	-	-	-	-	-	-	Prophage_13095918	0.623	-	-	-	-	-	-	-	-	-	-	-	-	-	-	PAI_AAO18076	0.623	-	-
157	ORF1_1472	1721359	1722729	+	456	-	Predicted ORF	-	-	AR_YP_001176513	0.645	-	-	-	-	-	-	-	-	-	-	-	-	-	-	-	-	-	-	-	-	-	-	-	-	-	-	-	-
158	ORF1_1507	1756245	1756940	+	231	-	Predicted ORF	VFG0473	*	-	-	-	-	-	-	-	-	-	-	-	-	-	-	-	-	-	-	-	-	-	-	-	-	-	-	-	-	ARI_24461541	0.424
159	ORF1_1531	1781424	1781891	-	155	-	Predicted ORF	-	-	-	-	-	-	-	-	-	-	-	-	Prophage_9632803	0.452	-	-	-	-	-	-	-	-	-	-	-	-	-	-	-	-	-	-
160	ORF1_1532	1782113	1784233	-	706	-	Predicted ORF	-	-	-	-	-	-	-	-	-	-	-	-	Prophage_38639964	0.609	-	-	-	-	-	-	-	-	-	-	-	-	-	-	-	-	-	-
161	ORF1_1605	1859218	1859895	+	225	-	Predicted ORF	VFG0475	0.662	-	-	-	-	-	-	-	-	-	-	-	-	-	-	-	-	-	-	-	-	-	-	-	-	-	-	-	-	-	-
162	ORF1_1606	1859892	1861373	+	493	-	Predicted ORF	VFG0474	0.513	AR_ABS72055	*	-	-	-	-	-	-	-	-	-	-	-	-	-	-	-	-	-	-	-	-	-	-	-	-	-	-	-	-
163	ORF1_1623	1880670	1881719	+	349	-	Predicted ORF	VFG1630	0.47	-	-	-	-	-	-	-	-	-	-	-	-	-	-	-	-	-	-	-	-	-	-	-	-	-	-	PAI_CAC43413	0.47	-	-
164	ORF1_1627	1886257	1886673	-	138	-	Predicted ORF	-	-	-	-	-	-	-	-	-	-	-	-	-	-	-	-	-	-	-	-	-	-	-	-	-	-	-	-	PAI_569550114	0.428	-	-
165	ORF1_1656	1922004	1922585	+	193	-	Predicted ORF	VFG1867	0.658	-	-	-	-	-	-	-	-	-	-	-	-	-	-	-	-	-	-	-	-	-	-	-	-	-	-	-	-	-	-
166	ORF1_1664	1930912	1931565	-	217	-	Predicted ORF	-	-	AR_ZP_04417104	0.664	-	-	-	-	-	-	-	-	-	-	-	-	-	-	-	-	-	-	-	-	-	-	-	-	-	-	-	-
167	ORF1_1691	1961886	1962896	-	336	-	Predicted ORF	-	-	-	-	-	-	-	-	-	-	-	-	Prophage_126010876	0.449	-	-	-	-	-	-	-	-	-	-	-	-	-	-	-	-	-	-
168	ORF1_1699	1969295	1969858	-	187	-	Predicted ORF	-	-	-	-	-	-	-	-	-	-	-	-	Prophage_9626269	0.567	-	-	-	-	-	-	-	-	-	-	-	-	-	-	-	-	-	-
169	ORF1_1703	1973195	1973527	-	110	-	Predicted ORF	-	-	-	-	-	-	-	-	-	-	-	-	Prophage_126010861	0.436	-	-	-	-	-	-	-	-	-	-	-	-	-	-	-	-	-	-
170	ORF1_1709	1975992	1977017	-	341	-	Predicted ORF	-	-	-	-	-	-	-	-	-	-	-	-	Prophage_9630472	0.736	-	-	-	-	-	-	-	-	-	-	-	-	-	-	-	-	-	-
171	ORF1_1710	1977071	1977397	-	108	-	Predicted ORF	-	-	-	-	-	-	-	-	-	-	-	-	Prophage_9630471	0.537	-	-	-	-	-	-	-	-	-	-	-	-	-	-	-	-	-	-
172	ORF1_1711	1977407	1978675	-	422	-	Predicted ORF	-	-	-	-	-	-	-	-	-	-	-	-	Prophage_9626248	0.629	-	-	-	-	-	-	-	-	-	-	-	-	-	-	-	-	-	-
173	ORF1_1712	1978665	1980257	-	530	-	Predicted ORF	-	-	-	-	-	-	-	-	-	-	-	-	Prophage_9626247	0.728	-	-	-	-	-	-	-	-	-	-	-	-	-	-	-	-	-	-
174	ORF1_1713	1980254	1980457	-	67	-	Predicted ORF	-	-	-	-	-	-	-	-	-	-	-	-	Prophage_9630467	0.735	-	-	-	-	-	-	-	-	-	-	-	-	-	-	-	-	-	-
175	ORF1_1714	1980462	1982390	-	642	-	Predicted ORF	-	-	-	-	-	-	-	-	-	-	-	-	Prophage_9630466	0.779	-	-	-	-	-	-	-	-	-	-	-	-	-	-	-	-	-	-
176	ORF1_1715	1982362	1982871	-	169	-	Predicted ORF	-	-	-	-	-	-	-	-	-	-	-	-	Prophage_9630465	0.485	-	-	-	-	-	-	-	-	-	-	-	-	-	-	-	-	-	-
177	ORF1_1721	1986815	1987228	-	137	-	Predicted ORF	-	-	-	-	-	-	-	-	-	-	-	-	Prophage_157311403	0.496	-	-	-	-	-	-	-	-	-	-	-	-	-	-	PAI_CAI77378	0.577	-	-
178	ORF1_1722	1987228	1987410	-	60	-	Predicted ORF	-	-	-	-	-	-	-	-	-	-	-	-	Prophage_148727161	0.533	-	-	-	-	-	-	-	-	-	-	-	-	-	-	-	-	-	-
179	ORF1_1726	1990187	1990693	-	168	-	Predicted ORF	-	-	-	-	-	-	-	-	-	-	-	-	Prophage_41057332	0.619	-	-	-	-	-	-	-	-	-	-	-	-	-	-	-	-	-	-
180	ORF1_1733	1993908	1994204	-	98	-	Predicted ORF	-	-	-	-	-	-	-	-	-	-	-	-	Prophage_9634198	0.551	-	-	-	-	-	-	-	-	-	-	-	-	-	-	-	-	-	-
181	ORF1_1734	1994318	1994524	-	68	-	Predicted ORF	-	-	-	-	-	-	-	-	-	-	-	-	Prophage_9634197	0.632	-	-	-	-	-	-	-	-	-	-	-	-	-	-	-	-	-	-
182	ORF1_1735	1994626	1995342	+	238	-	Predicted ORF	-	-	-	-	-	-	-	-	-	-	-	-	Prophage_9626292	0.592	-	-	-	-	-	-	-	-	-	-	-	-	-	-	-	-	-	-
183	ORF1_1747	2001045	2001269	+	74	-	Predicted ORF	-	-	-	-	-	-	-	-	-	-	-	-	Prophage_9634185	0.473	-	-	-	-	-	-	-	-	-	-	-	-	-	-	-	-	-	-
184	ORF1_1748	2001238	2002266	+	342	-	Predicted ORF	-	-	-	-	-	-	-	-	-	-	-	-	Prophage_9634144	0.438	-	-	-	-	-	-	-	-	-	-	-	-	-	-	-	-	-	-
185	ORF1_1752	2005236	2005940	-	234	-	Predicted ORF	-	-	AR_ZP_03837411	0.423	-	-	-	-	-	-	-	-	-	-	-	-	-	-	-	-	-	-	-	-	-	-	-	-	-	-	-	-
186	ORF1_1773	2031950	2033188	-	412	-	Predicted ORF	VFG1408	*	-	-	-	-	-	-	-	-	-	-	-	-	-	-	-	-	-	-	-	-	-	-	-	-	-	-	PAI_CAI36078	0.494	-	-
187	ORF1_1809	2071587	2072999	+	470	-	Predicted ORF	VFG0479	0.855	-	-	-	-	-	-	-	-	-	-	-	-	-	-	-	-	-	-	-	-	-	-	-	-	-	-	-	-	-	-
188	ORF1_1822	2089945	2091318	+	457	-	Predicted ORF	-	-	-	-	-	-	-	-	-	-	-	-	-	-	-	-	-	-	-	-	-	-	-	-	-	-	-	-	PAI_CAA21338	0.527	-	-
189	ORF1_1861	2132858	2133922	+	354	-	Predicted ORF	VFG1443	0.536	-	-	-	-	-	-	-	-	-	-	-	-	-	-	-	-	-	-	-	-	-	-	-	-	-	-	PAI_149774748	*	-	-
190	ORF1_1867	2144727	2145266	-	179	-	Predicted ORF	-	-	-	-	-	-	-	-	-	-	-	-	-	-	-	-	-	-	-	-	-	-	-	-	-	-	-	-	-	-	ARI_481190219	0.441
191	ORF1_1884	2166969	2167178	+	69	-	Predicted ORF	VFG0463	0.464	-	-	-	-	-	-	-	-	-	-	-	-	-	-	-	-	-	-	-	-	-	-	-	-	-	-	-	-	-	-
192	ORF1_1914	2192098	2194725	-	875	-	Predicted ORF	-	-	-	-	-	-	-	-	-	-	-	-	Prophage_80159786	*	-	-	-	-	-	-	-	-	-	-	-	-	-	-	PAI_151500324	0.605	-	-
193	ORF1_1915	2194988	2195701	+	237	-	Predicted ORF	-	-	-	-	-	-	-	-	-	-	-	-	-	-	-	-	-	-	-	-	-	-	-	-	-	-	-	-	PAI_151500322	0.54	ARI_16579865	*
194	ORF1_1918	2196871	2199156	+	761	-	Predicted ORF	-	-	-	-	-	-	-	-	-	-	-	-	Prophage_61806079	0.544	-	-	-	-	-	-	-	-	-	-	-	-	-	-	-	-	-	-
195	ORF1_1919	2199225	2200355	+	376	-	Predicted ORF	-	-	-	-	-	-	-	-	-	-	-	-	Prophage_66391516	0.556	-	-	-	-	-	-	-	-	-	-	-	-	-	-	-	-	-	-
196	ORF1_1952	2239749	2240441	+	230	-	Predicted ORF	-	-	-	-	-	-	-	-	-	-	-	-	Prophage_146329947	0.444	-	-	-	-	-	-	-	-	-	-	-	-	-	-	-	-	-	-
197	ORF1_1957	2245784	2246059	-	91	-	Predicted ORF	-	-	-	-	-	-	-	-	-	-	-	-	Prophage_156564019	0.56	-	-	-	-	-	-	-	-	-	-	-	-	-	-	-	-	-	-
198	ORF1_1961	2250200	2250823	-	207	-	Predicted ORF	VFG0077	0.58	-	-	-	-	-	-	-	-	-	-	Prophage_109302855	*	-	-	-	-	-	-	-	-	-	-	-	-	-	-	-	-	-	-
199	ORF1_1973	2265877	2267337	+	486	-	Predicted ORF	VFG1857	*	-	-	-	-	-	-	-	-	-	-	-	-	-	-	-	-	-	-	-	-	-	-	-	-	-	-	PAI_AAO17199	0.502	-	-
200	ORF1_2001	2300073	2300654	-	193	-	Predicted ORF	-	-	-	-	-	-	-	-	-	-	-	-	Prophage_157311388	0.554	-	-	-	-	-	-	-	-	-	-	-	-	-	-	-	-	-	-
201	ORF1_2004	2302953	2303363	+	136	-	Predicted ORF	-	-	-	-	-	-	-	-	-	-	-	-	-	-	-	-	-	-	-	-	-	-	-	-	-	-	-	-	PAI_569550114	0.463	-	-
202	ORF1_2005	2303525	2304532	-	335	-	Predicted ORF	-	-	-	-	-	-	-	-	-	-	-	-	-	-	-	-	-	-	-	-	-	-	-	-	-	-	-	-	-	-	ARI_506705	0.606
203	ORF1_2007	2305962	2306975	-	337	-	Predicted ORF	VFG2361	0.602	-	-	-	-	-	-	-	-	-	-	-	-	-	-	-	-	-	-	-	-	-	-	-	-	-	-	-	-	ARI_484359538	0.567
204	ORF1_2008	2306998	2307906	-	302	-	Predicted ORF	-	-	-	-	-	-	-	-	-	-	-	-	-	-	-	-	-	-	-	-	-	-	-	-	-	-	-	-	-	-	ARI_484359535	0.53
205	ORF1_2102	2407102	2409384	-	760	-	Predicted ORF	VFG1859	0.442	-	-	-	-	-	-	-	-	-	-	-	-	-	-	-	-	-	-	-	-	-	-	-	-	-	-	-	-	-	-
206	ORF1_2120	2429404	2430351	-	315	-	Predicted ORF	VFG0490	0.54	-	-	-	-	-	-	-	-	-	-	-	-	-	-	-	-	-	-	-	-	-	-	-	-	-	-	-	-	-	-
207	ORF1_2129	2436074	2436523	+	149	-	Predicted ORF	VFG0478	0.852	-	-	-	-	-	-	-	-	-	-	-	-	-	-	-	-	-	-	-	-	-	-	-	-	-	-	-	-	-	-
208	ORF1_2152	2466387	2468288	+	633	-	Predicted ORF	-	-	AR_ZP_03837173	0.512	-	-	-	-	-	-	-	-	-	-	-	-	-	-	-	-	-	-	-	-	-	-	-	-	-	-	-	-
209	ORF1_2160	2475281	2478505	-	1074	-	Predicted ORF	-	-	AR_NP_249117	0.424	-	-	-	-	-	-	-	-	-	-	-	-	-	-	-	-	-	-	-	-	-	-	-	-	-	-	-	-
210	ORF1_2166	2484284	2484745	-	153	-	Predicted ORF	-	-	AR_ZP_01987481	0.686	-	-	-	-	-	-	-	-	-	-	-	-	-	-	-	-	-	-	-	-	-	-	-	-	-	-	-	-
211	ORF1_2174	2491190	2491786	-	198	-	Predicted ORF	-	-	-	-	-	-	-	-	-	-	-	-	-	-	-	-	-	-	-	-	-	-	-	-	-	-	-	-	PAI_CAA21366	0.682	-	-
212	ORF1_2205	2519345	2521918	-	857	-	Predicted ORF	VFG0079	0.473	-	-	-	-	-	-	-	-	-	-	-	-	-	-	-	-	-	-	T6SS_108761289_TssH	0.478	-	-	-	-	-	-	-	-	-	-
213	ORF1_2213	2530261	2531337	-	358	-	Predicted ORF	VFG1630	0.43	-	-	-	-	-	-	-	-	-	-	-	-	-	-	-	-	-	-	-	-	-	-	-	-	-	-	PAI_CAC43413	0.43	-	-
214	ORF1_2234	2551894	2552079	-	61	-	Predicted ORF	VFG1886	0.59	-	-	-	-	-	-	-	-	-	-	Prophage_56692917	0.541	-	-	-	-	-	-	-	-	-	-	-	-	-	-	-	-	-	-
215	ORF1_2237	2555755	2556819	-	354	-	Predicted ORF	-	-	-	-	-	-	-	-	-	-	-	-	Prophage_109302868	0.528	-	-	-	-	-	-	-	-	-	-	-	-	-	-	-	-	-	-
216	ORF1_2239	2557690	2560263	+	857	-	Predicted ORF	VFG0562	0.768	-	-	-	-	-	-	-	-	-	-	-	-	-	-	-	-	-	-	-	-	-	-	-	-	-	-	-	-	-	-
217	ORF1_2240	2560509	2561492	-	327	-	Predicted ORF	VFG0477	0.791	-	-	-	-	-	-	-	-	-	-	-	-	-	-	-	-	-	-	-	-	-	-	-	-	-	-	-	-	-	-
218	ORF1_2252	2571717	2573948	-	743	-	Predicted ORF	VFG1887	0.423	-	-	-	-	-	-	-	-	-	-	-	-	-	-	-	-	-	-	-	-	-	-	-	-	-	-	-	-	-	-
219	ORF1_2265	2587208	2587783	-	191	-	Predicted ORF	VFG0121	0.655	-	-	-	-	-	-	-	-	-	-	-	-	-	-	-	-	-	-	-	-	-	-	-	-	-	-	-	-	-	-
220	ORF1_2271	2595118	2595771	-	217	-	Predicted ORF	DBETH_C6YLY8	0.627	-	-	-	-	-	-	-	-	-	-	-	-	-	-	-	-	-	-	-	-	-	-	-	-	-	-	-	-	-	-
221	ORF1_2291	2622109	2623185	-	358	-	Predicted ORF	-	-	-	-	-	-	-	-	-	-	-	-	-	-	-	-	-	-	-	-	-	-	-	-	-	-	-	-	PAI_AAO17213	0.846	-	-
222	ORF1_2292	2623511	2624674	-	387	-	Predicted ORF	-	-	-	-	-	-	-	-	-	-	-	-	-	-	-	-	-	-	-	-	-	-	-	-	-	-	-	-	PAI_AAO17214	0.788	-	-
223	ORF1_2293	2624777	2625790	-	337	-	Predicted ORF	-	-	-	-	-	-	-	-	-	-	-	-	-	-	-	-	-	-	-	-	-	-	-	-	-	-	-	-	PAI_AAO17215	0.706	-	-
224	ORF1_2294	2626110	2628107	-	665	-	Predicted ORF	-	-	-	-	-	-	-	-	-	-	-	-	-	-	-	-	-	-	-	-	-	-	-	-	-	-	-	-	PAI_AAO17218	0.794	-	-
225	ORF1_2361	2707615	2709750	-	711	-	Predicted ORF	VFG1670	0.684	-	-	-	-	-	-	-	-	-	-	-	-	-	-	-	-	-	-	-	-	-	-	-	-	-	-	PAI_CAD66195	0.684	-	-
226	ORF1_2362	2709865	2711175	-	436	-	Predicted ORF	VFG1671	0.702	-	-	-	-	-	-	-	-	-	-	-	-	-	-	-	-	-	-	-	-	-	-	-	-	-	-	PAI_CAD66196	0.702	-	-
227	ORF1_2399	2753368	2754477	-	369	-	Predicted ORF	VFG1224	0.493	-	-	-	-	-	-	-	-	-	-	-	-	-	-	-	-	-	-	-	-	-	-	-	-	-	-	-	-	-	-
228	ORF1_2400	2754461	2755561	-	366	-	Predicted ORF	VFG1223	0.65	-	-	-	-	-	-	-	-	-	-	-	-	-	-	-	-	-	-	-	-	-	-	-	-	-	-	-	-	-	-
229	ORF1_2459	2827841	2828326	-	161	-	Predicted ORF	-	-	-	-	-	-	-	-	-	-	-	-	-	-	-	-	-	-	-	-	-	-	-	-	-	-	-	-	-	-	ARI_482862082	0.46
230	ORF1_2462	2832216	2833787	-	523	-	Predicted ORF	-	-	-	-	-	-	-	-	-	-	-	-	-	-	-	-	-	-	-	-	-	-	-	-	-	-	-	-	-	-	ARI_697403879	0.434
231	ORF1_2468	2839130	2839924	-	264	-	Predicted ORF	-	-	-	-	-	-	-	-	-	-	-	-	Prophage_148747783	0.705	-	-	-	-	-	-	-	-	-	-	-	-	-	-	-	-	-	-
232	ORF1_2483	2858333	2858545	-	70	-	Predicted ORF	-	-	-	-	-	-	-	-	-	-	-	-	Prophage_13095918	0.571	-	-	-	-	-	-	-	-	-	-	-	-	-	-	PAI_AAO18076	0.657	-	-
233	ORF1_2485	2859474	2860988	-	504	-	Predicted ORF	VFG1668	0.581	-	-	-	-	-	-	-	-	-	-	-	-	-	-	-	-	-	-	-	-	-	-	-	-	-	-	PAI_CAD66193	0.581	ARI_484356532	*
234	ORF1_2501	2876942	2877325	+	127	-	Predicted ORF	-	-	-	-	-	-	-	-	-	-	-	-	Prophage_32453604	0.567	-	-	-	-	-	-	-	-	-	-	-	-	-	-	-	-	-	-
235	ORF1_2516	2900548	2901963	+	471	-	Predicted ORF	-	-	-	-	-	-	-	-	-	-	-	-	-	-	-	-	-	-	-	-	-	-	-	-	-	-	-	-	PAI_CAF28571	0.669	-	-
236	ORF1_2551	2943329	2944165	+	278	-	Predicted ORF	-	-	AR_ZP_02659903	0.734	-	-	-	-	-	-	-	-	-	-	-	-	-	-	-	-	-	-	-	-	-	-	-	-	-	-	-	-
237	ORF1_2554	2945505	2945996	-	163	-	Predicted ORF	-	-	AR_CAL48457	0.422	-	-	-	-	-	-	-	-	-	-	-	-	-	-	-	-	-	-	-	-	-	-	-	-	-	-	-	-
238	ORF1_2584	2980032	2980652	+	206	-	Predicted ORF	-	-	-	-	-	-	-	-	-	-	-	-	-	-	-	-	-	-	-	-	-	-	-	-	-	-	-	-	-	-	ARI_484355512	0.432
239	ORF1_2585	2980748	2980957	-	69	-	Predicted ORF	-	-	-	-	-	-	-	-	-	-	-	-	Prophage_13095918	0.493	-	-	-	-	-	-	-	-	-	-	-	-	-	-	PAI_AAO18076	0.493	-	-
240	ORF1_2594	2989690	2991339	-	549	-	Predicted ORF	-	-	-	-	-	-	-	-	-	-	-	-	-	-	-	-	-	-	-	-	-	-	-	-	-	-	-	-	-	-	ARI_484356528	0.455
241	ORF1_2597	2993587	2994987	-	466	-	Predicted ORF	-	-	-	-	-	-	-	-	-	-	-	-	Prophage_46401697	0.725	-	-	-	-	-	-	-	-	-	-	-	-	-	-	PAI_CAF28476	0.504	-	-
242	ORF1_2636	3035328	3036974	-	548	-	Predicted ORF	VFG1855	0.73	-	-	-	-	-	-	-	-	-	-	-	-	-	-	-	-	-	-	-	-	-	-	-	-	-	-	-	-	ARI_481190498	*
243	ORF1_2640	3040003	3041301	+	432	-	Predicted ORF	VFG1025	0.492	-	-	-	-	-	-	-	-	-	-	-	-	-	-	-	-	-	-	-	-	-	-	-	-	-	-	PAI_AAL08434	0.492	ARI_15808705	0.492
244	ORF1_2649	3051354	3051626	-	90	-	Predicted ORF	-	-	-	-	-	-	-	-	-	-	-	-	Prophage_156564019	0.567	-	-	-	-	-	-	-	-	-	-	-	-	-	-	-	-	-	-
245	ORF1_2667	3079137	3082238	-	1033	-	Predicted ORF	-	-	AR_NP_251184	0.484	-	-	-	-	-	-	-	-	-	-	-	-	-	-	-	-	-	-	-	-	-	-	-	-	-	-	-	-
246	ORF1_2676	3099829	3101487	+	552	-	Predicted ORF	-	-	-	-	-	-	-	-	-	-	-	-	-	-	-	-	-	-	-	-	-	-	-	-	-	-	-	-	-	-	ARI_12698388	0.582
247	ORF1_2713	3149655	3150839	-	394	-	Predicted ORF	-	-	AR_YP_001337728	0.541	-	-	-	-	-	-	-	-	-	-	-	-	-	-	-	-	-	-	-	-	-	-	-	-	-	-	-	-
248	ORF1_2735	3170102	3171049	+	315	-	Predicted ORF	VFG0332	0.771	-	-	-	-	-	-	-	-	-	-	Prophage_61806184	*	-	-	-	-	-	-	-	-	-	-	-	-	-	-	-	-	-	-
249	ORF1_2736	3171146	3172201	+	351	-	Predicted ORF	VFG0143	0.51	-	-	-	-	-	-	-	-	-	-	-	-	-	-	-	-	-	-	-	-	-	-	-	-	-	-	-	-	-	-
250	ORF1_2737	3172189	3173148	+	319	-	Predicted ORF	VFG0142	0.552	-	-	-	-	-	-	-	-	-	-	-	-	-	-	-	-	-	-	-	-	-	-	-	-	-	-	-	-	-	-
251	ORF1_2747	3183213	3184490	+	425	-	Predicted ORF	VFG0141	0.513	-	-	-	-	-	-	-	-	-	-	-	-	-	-	-	-	-	-	-	-	-	-	-	-	-	-	-	-	-	-
252	ORF1_2748	3184491	3184979	+	162	-	Predicted ORF	VFG0320	0.451	-	-	-	-	-	-	-	-	-	-	-	-	-	-	-	-	-	-	-	-	-	-	-	-	-	-	-	-	-	-
253	ORF1_2755	3189884	3190339	+	151	-	Predicted ORF	-	-	-	-	-	-	-	-	-	-	-	-	Prophage_84662702	0.603	-	-	-	-	-	-	-	-	-	-	-	-	-	-	-	-	-	-
254	ORF1_2786	3221910	3223319	+	469	-	Predicted ORF	VFG1399	0.53	-	-	-	-	-	-	-	-	-	-	-	-	-	-	-	-	-	-	-	-	-	-	-	-	-	-	-	-	-	-
255	ORF1_2836	3289520	3290080	-	186	-	Predicted ORF	VFG0576	0.595	-	-	-	-	-	-	-	-	-	-	Prophage_46401640	0.571	-	-	-	-	-	-	-	-	-	-	-	-	-	-	-	-	-	-
256	ORF1_2852	3317849	3319111	-	420	-	Predicted ORF	VFG1311	0.438	-	-	-	-	-	-	-	-	-	-	-	-	-	-	-	-	-	-	-	-	-	-	-	-	-	-	-	-	ARI_587656392	*
257	ORF1_2853	3319108	3320298	-	396	-	Predicted ORF	VFG1373	0.48	-	-	-	-	-	-	-	-	-	-	-	-	-	-	-	-	-	-	-	-	-	-	-	-	-	-	-	-	ARI_697403916	0.49
258	ORF1_2911	3388384	3389703	-	439	-	Predicted ORF	-	-	-	-	-	-	-	-	-	-	-	-	-	-	-	-	-	-	-	-	-	-	-	-	-	-	-	-	-	-	ARI_451313605	0.686
259	ORF1_2912	3389703	3389957	-	84	-	Predicted ORF	-	-	-	-	-	-	-	-	-	-	-	-	-	-	-	-	-	-	-	-	-	-	-	-	-	-	-	-	-	-	ARI_481190506	0.6
260	ORF1_2913	3390496	3391113	+	205	-	Predicted ORF	-	-	-	-	-	-	-	-	-	-	-	-	-	-	-	-	-	-	-	-	-	-	-	-	-	-	-	-	PAI_284931896	0.512	-	-
261	ORF1_2921	3399118	3399918	+	266	-	Predicted ORF	-	-	-	-	-	-	-	-	-	-	-	-	-	-	-	-	-	-	-	-	-	-	-	-	-	-	-	-	PAI_28207200	0.485	-	-
262	ORF1_2922	3400120	3401259	-	379	-	Predicted ORF	-	-	-	-	-	-	-	-	-	-	-	-	-	-	-	-	-	-	-	-	-	-	-	-	-	-	-	-	-	-	ARI_481190438	0.58
Microbial Bioinformatics Group at MML, SJTU

## Sheet: VF
VRprofile
Ha-values for the genes in the subject genome against the query databases
No
	Synonym	Length(aa)	Ha-value		related functions
1	ORF1_14	701	0.515	flhA - flagellar biosynthesis protein FlhA; Organism: Pseudomonas aeruginosa PAO1	Adherence; Motility; Swimming motility; Play a role in biofilm formation and other pathogenic adaptations
2	ORF1_15	371	0.445	Flagella from Pseudomonas : flhB	Adherence; Motility; Swimming motility; Play a role in biofilm formation and other pathogenic adaptations
3	ORF1_16	263	0.456	fliR - flagellar biosynthetic protein FliR; Pseudomonas aeruginosa PAO1	Adherence; Motility; Swimming motility; Play a role in biofilm formation and other pathogenic adaptations
4	ORF1_17	89	0.483	fliQ - flagellar biosynthetic protein FliQ; Pseudomonas aeruginosa PAO1	Adherence; Motility; Swimming motility; Play a role in biofilm formation and other pathogenic adaptations
5	ORF1_18	245	0.571	fliP - flagellar biosynthetic protein FliP; Pseudomonas aeruginosa PAO1	Adherence; Motility; Swimming motility; Play a role in biofilm formation and other pathogenic adaptations
6	ORF1_25	443	0.614	Flagella from Pseudomonas : fliI	Adherence; Motility; Swimming motility; Play a role in biofilm formation and other pathogenic adaptations
7	ORF1_31	140	0.486	Flagella from Legionella : flgC	Not required for intracellular growth but enhance the invasion capacity
8	ORF1_34	241	0.433	flgF - from Pseudomonas aeruginosa PAO1	Adherence; Motility; Swimming motility; Play a role in biofilm formation and other pathogenic adaptations
9	ORF1_35	261	0.594	flgG from Pseudomonas aeruginosa PAO1	Adherence; Motility; Swimming motility; Play a role in biofilm formation and other pathogenic adaptations
10	ORF1_36	219	0.47	flgH from Pseudomonas aeruginosa PAO1	Adherence; Motility; Swimming motility; Play a role in biofilm formation and other pathogenic adaptations
11	ORF1_37	364	0.563	flgI - from Pseudomonas aeruginosa PAO1	Adherence; Motility; Swimming motility; Play a role in biofilm formation and other pathogenic adaptations
16	ORF1_114	384	0.557	LPS from Bordetella : bplF	Endotoxin; Prevents clearance of the organism by host surfactant protein; Confers protection to the bacterium from complement-mediated cell lysis
17	ORF1_115	196	0.531	LPS from Bordetella : bplG	Endotoxin; Prevents clearance of the organism by host surfactant protein; Confers protection to the bacterium from complement-mediated cell lysis
18	ORF1_116	639	0.457	LPS from Bordetella : bplL	Endotoxin; Prevents clearance of the organism by host surfactant protein; Confers protection to the bacterium from complement-mediated cell lysis
21	ORF1_198	684	0.658	T2SS from Shigella : gspD	Secretion system; Type II secretion system;
22	ORF1_199	524	0.66	T2SS from Shigella : gspE	Secretion system; Type II secretion system;
23	ORF1_200	407	0.609	T2SS from Shigella : gspF	Secretion system; Type II secretion system;
24	ORF1_201	152	0.71	T2SS from Shigella : gspG	Secretion system; Type II secretion system;
30	ORF1_346	323	0.452	Capsule from Campylobacter : kpsF	Adherence; Phase variation; Play an important role in bacterial survival and persistance in the enviroment and evasion of host immune response; The presence of heptose residues in the capsule may be important for virulence. Heptose residues found in some cell surface-located glycoconjugates are required for adhesion
31	ORF1_393	286	0.444	Type IV pili from Pseudomonas : xcpA/pilD	Adherence; twitching motility; Attaches to host cells, but not to mucin, causing a twitching motility that allows the bacteria to move along the cell surface; biofilm formation
32	ORF1_396	411	0.431	Type IV pili from Legionella : pilC	Adherence; Contribute to complement-independent binding, perhaps as the ligand for protozoan lectin
33	ORF1_397	501	0.521	Type IV pili from Pseudomonas : pilB	Adherence; twitching motility; Attaches to host cells, but not to mucin, causing a twitching motility that allows the bacteria to move along the cell surface; biofilm formation
34	ORF1_398	152	0.468	Type IV pili from Pseudomonas : pilA	Adherence; Motility; Swimming motility; Play a role in biofilm formation and other pathogenic adaptations
37	ORF1_421	356	0.539	Type IV pili from Legionella : pilC	Adherence; Contribute to complement-independent binding, perhaps as the ligand for protozoan lectin
38	ORF1_427	126	0.444	Type IV pili from Pseudomonas : pilA
39	ORF1_428	284	0.451	PanC/PanD from Mycobacterium : panC	Metabolic adaptation; Lipid biosynthesis and metabolism play a pivotal role in the intracellular replication and persistence of M. tuberculosis. Pantothenic acid (vitamin B5) is an essential molecule required for the synthesis of coenzyme A and acyl carrier protein (ACP). PanC (pantothenate synthetase) and PanD (aspartate-1-decarboxylase) involved in pantothenate biosynthesis.
42	ORF1_462	476	0.676	LOS from Haemophilus : rfaE	endotoxin; Major immunogen; LOS phosphorylcholine (ChoP) may influence invasion via interaction with PAF receptor and stimulates of inflammotory signals LPS phase variation is characterized by the spontaneous loss and gain of oligosaccharide structures present in the outer core. the phase variable expression of LPS biosynthesis genes promotes evasion of antigen-specific host immune defences and a…
47	ORF1_527	193	0.42	LOS from Campylobacter : gmhA	Adherence; Phase variation; Structural mimicry; LOS diversity is important for the ability to colonize a wide variety of hosts and intestinal niches; The ability to generate variation at high frequency, the molecular mimicry evident in LOS structure support a role in the avoidance of host defences;The similarity of LOS structures to host gangliosides and the subsequent ability to generate crossre…
48	ORF1_532	436	0.58	Isocitrate lyase from Mycobacterium : icl	Metabolic adaptation; Required for persistant infection
69	ORF1_692	711	0.655	PAI III536 from Escherichia : orf47	Product: putative cadaverin decarboxylase;Inserted locus: thrW tRNA
73	ORF1_709	590	0.538	T6SS from Vibrio : vasA	Secretion system; Type VI secretion system; Antibacterial and antienkaryotic activities
75	ORF1_711	413	*	T6SS from Vibrio : vasE	Secretion system; Type VI secretion system; Antibacterial and antienkaryotic activities
77	ORF1_713	446	0.619	T6SS from Vibrio : vasE	Secretion system; Type VI secretion system; Antibacterial and antienkaryotic activities
80	ORF1_716	513	*	T6SS from Vibrio : vasH	Secretion system; Type VI secretion system; Antibacterial and antienkaryotic activities
81	ORF1_717	202	*	T6SS from Vibrio : vasI	Secretion system; Type VI secretion system; Antibacterial and antienkaryotic activities
87	ORF1_725	488	0.678	SPI-5 from Salmonella : pipD	Inserted locus: serT tRNA;Phenotype: Associated with enteropathogenesis; Encode effectors that are induced by distinct regulatory cues and targeted to different TTSS:SopB is secreted by TTSS of SPI1PipB is translocated by the SPI-2 TTSS to the Salmonella-containing vacuole and Salmonella-induced filaments
88	ORF1_733	314	0.42	VPI-2 from Vibrio : VC1772	Inserted locus: ser tRNA;Phenotype: Encoding an accessory virulence factor neuraminidase (nanH). Naminidase is secreted and converts oligosaccharides by cleavage of sialic acid. The reaction results in a large number of ganglioside GM1-like molecules on host cell surfaces, which serve as binding sites for the cholera toxin. But this process in not absolutely required for the action of cholera tox…
89	ORF1_740	708	0.709	T2SS from Shigella : gspD	Secretion system; Type II secretion system;
90	ORF1_741	529	0.705	T2SS from Shigella : gspE	Secretion system; Type II secretion system;
91	ORF1_742	424	0.663	T2SS from Shigella : gspF	Secretion system; Type II secretion system;
92	ORF1_743	152	0.691	T2SS from Shigella : gspG	Secretion system; Type II secretion system;
93	ORF1_746	210	0.481	T2SS from Shigella : gspJ	Secretion system; Type II secretion system;
94	ORF1_747	391	0.427	T2SS from Shigella : gspK	Secretion system; Type II secretion system;
95	ORF1_752	1017	0.514	StcE (secreted protease of C1 esterase inhibitor from EHEC)from Escherichia : stcE	Protease; Sepcifically cleaves the C1 esterase inhibitor (C1-INH), which is an essential regulator of classical and alternative complement, intrinsic coagulation and contact activation, therefore disrupts complement cascade and contributes to the tissue damage, intestinal oedema and thrombotic cytopenia
98	ORF1_771	453	0.618	SRL from Shigella : orf34	Inserted locus: serX tRNA;Phenotype: Contains genes encoding resistance to streptomycin, ampicillin, and tetracycline and a complete ferric dicitrate uptake system
100	ORF1_786	136	0.449	Flagella from Yersinia : flgB	Secretion system; Invasion; Motility; Required for efficient cellular invasion. YplA, a phospholipase is secreted by this type III flagellum secretion system. YplA is required for survival of Y. enterocolitica in the Peyer's patches and for stimulation of the acute inflammatory response of the host to the infection.
101	ORF1_787	137	0.548	Flagella from Pseudomonas : flgC	Adherence; Motility; Swimming motility; Play a role in biofilm formation and other pathogenic adaptations
102	ORF1_790	248	0.506	Flagella from Pseudomonas : flgF	Adherence; Motility; Swimming motility; Play a role in biofilm formation and other pathogenic adaptations
103	ORF1_791	262	0.53	Flagella from Pseudomonas : flgG	Adherence; Motility; Swimming motility; Play a role in biofilm formation and other pathogenic adaptations
104	ORF1_792	370	0.57	Flagella from Pseudomonas : flgI	Adherence; Motility; Swimming motility; Play a role in biofilm formation and other pathogenic adaptations
105	ORF1_794	230	0.439	Flagella from Pseudomonas : flgH	Adherence; Motility; Swimming motility; Play a role in biofilm formation and other pathogenic adaptations
106	ORF1_798	351	0.45	Lewis antigen from Helicobacter : neuA/flmD	Molecular mimicry; The O-chain region of LPS express Lewis antigen that are also expressed in the gastric mucosa of humans. This antigenic mimicry may suppress an immune response against the bacteria, or allow it to adhere to the gastric mucasa or play a role in certain autoimmune aspects
107	ORF1_801	230	*	Lewis antigen from Helicobacter : neuA/flmD	Molecular mimicry; The O-chain region of LPS express Lewis antigen that are also expressed in the gastric mucosa of humans. This antigenic mimicry may suppress an immune response against the bacteria, or allow it to adhere to the gastric mucasa or play a role in certain autoimmune aspects
108	ORF1_802	390	*	LPS from Bordetella : bplF	Endotoxin; Prevents clearance of the organism by host surfactant protein; Confers protection to the bacterium from complement-mediated cell lysis
109	ORF1_803	332	*	Capsule from Staphylococcus : cap8E	Antiphagocytosis
110	ORF1_809	509	0.503	Flagella from Pseudomonas : fleQ	Adherence; Motility; Swimming motility; Play a role in biofilm formation and other pathogenic adaptations
111	ORF1_811	107	0.467	Flagella from Pseudomonas : fliE	Adherence; Motility; Swimming motility; Play a role in biofilm formation and other pathogenic adaptations
112	ORF1_813	342	0.559	Flagella from Pseudomonas : fliG	Adherence; Motility; Swimming motility; Play a role in biofilm formation and other pathogenic adaptations
113	ORF1_815	439	0.58	Flagella from Pseudomonas : fliI	Adherence; Motility; Swimming motility; Play a role in biofilm formation and other pathogenic adaptations
114	ORF1_819	347	0.559	Flagella from Pseudomonas: fliM	Adherence; Motility; Swimming motility; Play a role in biofilm formation and other pathogenic adaptations
115	ORF1_820	131	0.634	Flagella from Pseudomonas: fliN	Adherence; Motility; Swimming motility; Play a role in biofilm formation and other pathogenic adaptations
116	ORF1_822	261	0.59	Flagella from Pseudomonas : fliP	Adherence; Motility; Swimming motility; Play a role in biofilm formation and other pathogenic adaptations
117	ORF1_823	89	0.517	Flagella from Pseudomonas : fliQ	Adherence; Motility; Swimming motility; Play a role in biofilm formation and other pathogenic adaptations
118	ORF1_825	377	0.492	Flagella from Pseudomonas : flhB	Adherence; Motility; Swimming motility; Play a role in biofilm formation and other pathogenic adaptations
119	ORF1_826	698	0.647	Flagella from Pseudomonas : flhA	Adherence; Motility; Swimming motility; Play a role in biofilm formation and other pathogenic adaptations
120	ORF1_828	296	0.534	Flagella from Pseudomonas : fleN	Adherence; Motility; Swimming motility; Play a role in biofilm formation and other pathogenic adaptations
121	ORF1_829	240	0.562	Flagella from Legionella : fliA	Motility; Not required for intracellular growth but enhance the invasion capacity
124	ORF1_914	223	0.422	copR - Copper resistance; transcriptional regulatory protein
126	ORF1_930	904	0.524	MgtBC from Salmonella : mgtB	Magnesium uptake; MgtA and MgtB are not required for intracellular survival or for virulence, MgtC is essential for both functions
128	ORF1_985	167	0.455	VPI from Vibrio : tagD	Inserted locus: Flanked by att sites, inserts near the ssrA locus, a tRNA-like gene;Phenotype:Contains the tcp gene cluster encoding the type IV pilus toxin-coregulated pilus;colonization factor which can act as the cholera toxin bacteriophage (CTXΦ) receptor; Also contains genes (toxT, tcpPH) that regulate virulence factor expression; Recently a virulence factor Mop encoded by VPI has been ident…
130	ORF1_1053	219	0.42	copR - Copper resistance; transcriptional regulatory protein
132	ORF1_1136	214	0.495	LetA/S from Legionella : letA	Regulation; Two-component system; Activates gene expression indirectly by counteracting the repressor of translation known as CsrA or RsmA
133	ORF1_1157	352	0.429	PAI III536 from Escherichia : orf7	Inserted locus: thrW tRNA
134	ORF1_1162	711	0.631	PAI III536 from Escherichia : orf47	Inserted locus: thrW tRNA
135	ORF1_1163	440	0.643	PAI III536 from Escherichia : orf48	Inserted locus: thrW tRNA;putative lysin/cadaverin transporter
141	ORF1_1269	277	0.653	Agf(Thin aggregative fimbriae (or curli)) from Salmonella : csgG	Adherence; Fimbrial;Aids in attachment to the villi of enterocytes, also cause the bacteria to become attached to each other
142	ORF1_1270	133	0.459	csgF - Agf from Salmonella	Adherence; Fimbrial;Aids in attachment to the villi of enterocytes, also cause the bacteria to become attached to each other
143	ORF1_1271	135	0.444	csgE - Agf from Salmonella : csgE	Adherence; Fimbrial;Aids in attachment to the villi of enterocytes, also cause the bacteria to become attached to each other
144	ORF1_1283	246	0.435	Flagella from Legionella : motC	Motility; Not required for intracellular growth but enhance the invasion capacity
147	ORF1_1296	257	0.479	CcmC from Legionella : ccmC	Iron uptake; Functions: Required for cytochrome c production, promotes iron assimilation and intracellular infection
153	ORF1_1397	725	0.772	KatAB from Legionella : katB	Stress protein; A periplasmic catalase, expressed maximally during the postexponential phase;Important for intracellular survival and transmission
155	ORF1_1432	291	0.443	Enterobactin from Escherichia : fepC	Iron uptake; Siderophore; Iron uptake: the siderophore enterobactin imported through the FepA receptor and the FepBCDG system
158	ORF1_1507	231	*	copR - Copper resistance; transcriptional regulatory protein
161	ORF1_1605	225	0.662	PhoPQ from Salmonella : phoQ	Activated by low divalent cations magnesium and calcium levels; Control expression of more than 40 genes; Required for intracellular survival, cantionic antimicrobial peptides (CAMPs) resistance, stimulation of cytokine secretion
162	ORF1_1606	493	0.513	PhoPQ from Salmonella : phoQ	Activated by low divalent cations magnesium and calcium levels; Control expression of more than 40 genes; Required for intracellular survival, cantionic antimicrobial peptides (CAMPs) resistance, stimulation of cytokine secretion
163	ORF1_1623	349	0.47	PAI III536 from Escherichia : orf7	Inserted locus: thrW tRNA
165	ORF1_1656	193	0.658	SodB from Legionella : sodB	Stress protein; A cytoplasmic iron superoxide dismutase; Important for intracellular survival and transmission
186	ORF1_1773	412	*	PDIM from Mycobacterium : mas	Cell wall; Play a mainly structural role in providing a stable base for the insertion of other lipid and also play a role as a fluidity modifier, whose function could be to modulate cell wall viscosity
187	ORF1_1809	470	0.855	SPI-2 from Salmonella : pykF	Inserted locus: valV tRNA;Phenotype: Encodes a second TTSS that is essential for intracellular growth; Necessary in the systemic phase of inection
189	ORF1_1861	354	0.536	OmpA from Escherichia : ompA	Invasion; Serum resistance; ontributes to brain mecrovascular endothelial cells (BMECs) invasion via a ligand-receptor interaction. Interaction of OmpA with its receptor induces actin condensation at the binding site. The actin reorganization induced by E. coli depends on activation of several host proteins involved in signaling, including focal adhesion kinase, PI3-kinase, PKC-α, and caveolin-1;…
191	ORF1_1884	69	0.464	SodCI from Salmonella : sodCI; sodC - superoxide dismutase (copper-zinc)	Stress protein; Contribute to survival during systemic phase of infection
198	ORF1_1961	207	0.58	ClpP from Listeria : clpP	Stress protein;An ATPase promoting early escape form the phagosome of macrophages; ClpC is also required for adhesion and invasion, possibly by modulating the expression of InlA,InlB and ActA
199	ORF1_1973	486	*	IraAB from Legionella : iraB	Iron uptake; IraA, a methyltransferase, is critical for virulence; IraB, a homologue of di- and tri-peptide transporters, may involved in a novel method of iron acquisition which may utilize iron-loaded peptides
203	ORF1_2007	337	0.602	O-antigen from Yersinia : galE	LPS O antigen mutants were severely impaired in their ability to colonize the Peyer's patches and did not colonize spleen and liver. The absence of O antigen in the outer membrane affects the expression of other Yersinia virulence factors.
205	ORF1_2102	760	0.442	FeoAB from Legionella : feoB	Iron uptake; Ferrous iron uptake; A feoB mutant of L. pneumophila has a lowered Fe2+ uptake and is attenuated for intracellular growth
206	ORF1_2120	315	0.54	FeoAB from Legionella : feoB	IInserted locus: valV tRNA;Phenotype: Encodes a second TTSS that is essential for intracellular growth; Necessary in the systemic phase of inection
207	ORF1_2129	149	0.852	Fur (ferric uptake regulator) from Salmonella : fur	Regulation; Repress the expression of iron-regulated genes; Also required for acid-induced activation of atr genes
212	ORF1_2205	857	0.473	from Listeria : clpP- ATP-dependent protease	Stress protein; An ATPase promoting early escape form the phagosome of macrophages; ClpC is also required for adhesion and invasion, possibly by modulating the expression of InlA,InlB and ActA
213	ORF1_2213	358	0.43	IraAB from Legionella : iraB	Iron uptake; IraA, a methyltransferase, is critical for virulence; IraB, a homologue of di- and tri-peptide transporters, may involved in a novel method of iron acquisition which may utilize iron-loaded peptides
214	ORF1_2234	61	0.59	O-antigen from Yersinia : galE	LPS O antigen mutants were severely impaired in their ability to colonize the Peyer's patches and did not colonize spleen and liver. The absence of O antigen in the outer membrane affects the expression of other Yersinia virulence factors.
216	ORF1_2239	857	0.768	mutS - methyl-directed mismatch repair, recognize exocyclic adducts of guanosine
217	ORF1_2240	327	0.791	RpoS from Salmonella : rpoS	Activated by low divalent cations magnesium and calcium levels; Control expression of more than 40 genes; Required for intracellular survival, cantionic antimicrobial peptides (CAMPs) resistance, stimulation of cytokine secretion
218	ORF1_2252	743	0.423	RelA from Legionella : relA	Regulation; Enzyme; Dispensable for intracellular growth within amoebae or the alveolar macrophages, but dedicate to convert from a replicated to a virulent state
219	ORF1_2265	191	0.655	Alginate from Pseudomonas : algU	Antiphagocytosis; Serum resistance; Allows the bacteria form biofilm; Contributes to the persistence of the bacteria in the CF lung: act as an adhesin, preventing the bacteria from being expelled from the lung, and alginate slime layer makes it more difficult for phagocytes to ingest and kill the bacteria
220	ORF1_2271	217	0.627	HLY3_BACCE Hemolysin-3 OS=Bacillus cereus PE=3 SV=1
225	ORF1_2361	711	0.684	PAI III536 from Escherichia : orf47	Inserted locus: thrW tRNA
226	ORF1_2362	436	0.702	PAI III536 from Escherichia : orf48- putative lysin/cadaverin transporter	Inserted locus: thrW tRNA
227	ORF1_2399	369	0.493	Type IV pili from Pseudomonas : pilU	Attaches to host cells, but not to mucin, causing a twitching motility that allows the bacteria to move along the cell surface; biofilm formation
228	ORF1_2400	366	0.65	Type IV pili from Pseudomonas : pilT	Attaches to host cells, but not to mucin, causing a twitching motility that allows the bacteria to move along the cell surface; biofilm formation
233	ORF1_2485	504	0.581	PAI III536 from Escherichia : orf45	Inserted locus: thrW tRNA
242	ORF1_2636	548	0.73	Hsp60 from Legionella : htpB	Adherence; Mediate a complement-independent attachment to mammalian and amoebal host cells
243	ORF1_2640	432	0.492	SRL from Shigella : orf9	Inserted locus: serX tRNA; Contains genes encoding resistance to streptomycin, ampicillin, and tetracycline and a complete ferric dicitrate uptake system
248	ORF1_2735	315	0.771	LOS from Haemophilus : rfaD	Endotoxin; ajor immunogen; LOS phosphorylcholine (ChoP) may influence invasion via interaction with PAF receptor and stimulates of inflammotory signals; LPS phase variation is characterized by the spontaneous loss and gain of oligosaccharide structures present in the outer core. the phase variable expression of LPS biosynthesis genes promotes evasion of antigen-specific host immune defences and a…
249	ORF1_2736	351	0.51	LPS from Pseudomonas : waaF	Adherence; Endotoxin; Mediates biological effects including resistance to serum killing and phagocytosis; The binding to normal CFTR (cystic fibrosis transmembrane conductance regulator); and invasion of host cells may make a contribution to virulence in the human eye; Internalization by binding to normal CFTR protein expressed by airway epithelial cells followed by desquamation of bacteria-laden…
250	ORF1_2737	319	0.552	LPS from Pseudomonas : waaC	Adherence; Endotoxin; Mediates biological effects including resistance to serum killing and phagocytosis; The binding to normal CFTR (cystic fibrosis transmembrane conductance regulator); and invasion of host cells may make a contribution to virulence in the human eye; Internalization by binding to normal CFTR protein expressed by airway epithelial cells followed by desquamation of bacteria-laden…
251	ORF1_2747	425	0.513	LPS from Pseudomonas : waaA	Adherence; Endotoxin; Mediates biological effects including resistance to serum killing and phagocytosis; The binding to normal CFTR (cystic fibrosis transmembrane conductance regulator); and invasion of host cells may make a contribution to virulence in the human eye; Internalization by binding to normal CFTR protein expressed by airway epithelial cells followed by desquamation of bacteria-laden…
252	ORF1_2748	162	0.451	LPS from Helicobacter : kdtB	Endotoxin; Low toxicity; Adherence; H. pylori LPS have much lower immunobiological activities than enterobacterial LPS, thus may prolong H. pylori infection for longer; Mediates a lectin-like interaction with laminin, the binding may disrupt epithelial cell-basement membrane interactions contributing to the disruption of gastric mucosal integrity and the development of gastric leakiness associate…
254	ORF1_2786	469	0.53	Gene from Mycobacterium : glnA1	GLUTAMINE SYNTHETASE GLNA1 (GLUTAMINE SYNTHASE) (GS-I)
255	ORF1_2836	186	0.595	SPI-4 from Salmonella : ssb	Inserted locus: Flanked by ssb and soxSR;Phenotype: Has eighteen putative ORFs, encodes a type I secretion system that mediates toxin secretion, much like E.coli hemolysin secretion; SPI4-dependent mechanism of inducing apoptosis may act in concert with the binding of SipB to caspase-1
256	ORF1_2852	420	0.438	Capsule from Staphylococcus : cap8O	Antiphagocytosis;
257	ORF1_2853	396	0.48	Capsule from Streptococcus pneumoniae;Causes pneumonia, meningitis, from Streptococcus : cps4I	Antiphagocytosis; Resistant to complement deposition and masks cell wall-associated complement from being recognized by the complement receptors on phagocytes

## Sheet: AR
VRprofile
Ha-values for the genes in the subject genome against the query databases
No	Synonym	Length(aa)	Ha-value
13	ORF1_101	1040	0.47	mexw/multidrug efflux protein
25	ORF1_212	833	0.54	pbp1a/Membrane carboxypeptidase/penicillin-binding protein/penicillin-binding protein 1A
35	ORF1_401	280	0.461	ampE, Ampicillin resistance inner membrane protein
36	ORF1_413	445	0.528	outer membrane protein TolC:Resistance-nodulation-cell division transporter system. Multidrug resistance efflux pump. acriflavin resistance [AR:0000045];glycylcycline resistance [AR:0000042];resistance-nodulation-cell division (RND) drug efflux [AR:0010004];aminoglycoside resistance [AR:0000016];beta lactam resistance [AR:0000048];macrolide resistance [AR:0000033]
40	ORF1_449	268	0.745	AR_ZP_04621202 Undecaprenyl-diphosphatase;drug enzymatic destruction [AR:0001004];bacitracin resistance [AR:0000041]
43	ORF1_519	252	*	Metallo-beta-lactamase/blaB4
97	ORF1_755	546	*	tcma/ tetracenomycin C efflux protein
124	ORF1_914	223	*	vanrb/drug target replacement;vancomycin resistance
129	ORF1_1015	402	0.555	bcr/bicyclomycin/multidrug efflux system;Citrobacter sp. 30_2
145	ORF1_1294	205	*	bcra/bacitracin resistance /ABC-type multidrug transport system, ATPase component
152	ORF1_1393	214	0.458	macrolide transporter ATP-binding /permease protein;Resistance-nodulation-cell division transporter system. Multidrug resistance efflux pump. Macrolide-specific efflux system.
154	ORF1_1400	299	0.485	PSE family carbenicillin-hydrolyzing class A beta-lactamase CARB-9; Vibrio cholerae
157	ORF1_1472	456	0.645	mdtk/hypothetical protein ENTCAN_02058; Major facilitator superfamily transporter. Multidrug resistance efflux pump; enoxacin;norfloxacin; Enterobacter sp. 638
162	ORF1_1606	493	*	vansd/VanSD5/drug target replacement;vancomycin resistance;teicoplanin resistance
166	ORF1_1664	217	0.664	catb5/ chloramphenicol acetyltransferase variant; Group B chloramphenicol acetyltransferase, which can inactivate chloramphenicol. Also referred to as xenobiotic acetyltransferase;Antibiotic Resistance chloramphenicol;Organism Vibrio cholerae 12129(1)
185	ORF1_1752	234	0.423	macb/macrolide transporter ATP-binding /permease protein; Resistance-nodulation-cell division transporter system. Multidrug resistance efflux pump. Macrolide-specific efflux system.
208	ORF1_2152	633	0.512	pbp2/ penicillin Resistance;The enzyme has a penicillin-insensitive transglycosylase N-terminal domain (formation of linear glycan strands) and a penicillin-sensitive transpeptidase C-terminal domain (cross-linking of the peptide subunits)
209	ORF1_2160	1074	0.424	mexb/multidrug efflux transporter MexB; Resistance-nodulation-cell division transporter system. Multidrug resistance efflux pump;tigecycline resistance;resistance-nodulation-cell division (RND) drug efflux;aminoglycoside resistance;fluoroquinolone resistance [AR:0000026];tetracycline resistance;beta lactam resistance;Organism Pseudomonas aeruginosa PAO1
210	ORF1_2166	153	0.686	tet34/ xanthine-guanine phosphoribosyltransferase; tetracycline resistance;Organism Vibrio harveyi HY01
236	ORF1_2551	278	0.734	ksga/dimethyladenosine transferase; kasugamycin resistance
237	ORF1_2554	163	0.422	dfra26/ trimethoprim-resistance dihydrofolate reductase; Group A drug-insensitive dihydrofolate reductase, which can not be inhibited by trimethoprim.;Antibiotic Resistance trimethoprim;Organism Escherichia coli
245	ORF1_2667	1033	0.484	mexf/multidrug efflux RND transporter MexF; Resistance-nodulation-cell division transporter system. Multidrug resistance efflux pump; chloramphenicol resistance;resistance-nodulation-cell division (RND) drug efflux;fluoroquinolone resistance
247	ORF1_2713	394	0.541	emrd/multidrug resistance protein D; major facilitator superfamily (MFS) drug efflux ;aminoglycoside resistance

## Sheet: T3SE 44SE
VRprofile
Ha-values for the genes in the subject genome against the query databases
No	Synonym	T4SE
	ORF(aa)	Hit	Ha-value
1
2

## Sheet: PROPHAGE
VRprofile
Ha-values for the genes in the subject genome against the query databases
No	Synonym	Length(aa)
			Ha-value
42	ORF1_462	476	*
45	ORF1_522	155	0.452	Prophage_46401827 NC_005859 rnh putative RNaseH ribonuclease {Enterobacteria phage T5}/putative Ribonuclease HI [Pseudomonas phage EL]
46	ORF1_523	243	*
51	ORF1_576	417	0.482	Prophage|Prophage_37651489 NC_005135 hypothetical protein {Aeromonas phage 44RR2.8t}/hypothetical protein ST44RRORF008c [Aeromonas virus 44RR2]
52	ORF1_588	304	0.533	Prophage|Prophage_56692914 NC_006552 RdgC exonuclease {Pseudomonas phage F116}
53	ORF1_605	106	0.509	Prophage|Prophage_23505495 NC_004313 lysis protein (holin) {Enterobacteria phage ST64B}
54	ORF1_606	137	0.467	Prophage|Prophage_24371578 NC_004348 lysis similar to bacteriophage PS3 gp19 in GenBank Accession Number CAA09701 {Enterobacteria phage ST64T}
55	ORF1_608	63	0.619	Prophage|Prophage_9630521 NC_001901 synonym gene 56 {Enterobacteria phage N15}
56	ORF1_609	114	0.553	Prophage|Prophage_32128472 NC_004902 endonuclease of the HNH family {Xanthomonas phage Xp10}
57	ORF1_612	429	0.464	Prophage|Prophage_148727185 NC_009543 head portal protein {Xanthomonas phage phiXo411}
58	ORF1_613	285	0.512	Prophage|Prophage_32128420 NC_004902 protease of the ClpP family {Xanthomonas phage Xp10}
59	ORF1_614	405	0.474	Prophage|Prophage_32128421 NC_004902 head protein major capsid subunit precursor {Xanthomonas phage Xp10}
60	ORF1_617	140	0.471	Prophage|Prophage_22855005 NC_004167 hypothetical protein {Bacillus phage phi105}
61	ORF1_619	155	0.555	Prophage|Prophage_46402098 NC_005857 major tail shaft subunit {Klebsiella phage phiKO2}
62	ORF1_620	112	0.424	rophage|Prophage_33770522 NC_005069 hypothetical protein {Yersinia phage PY54}
63	ORF1_623	234	0.466	Prophage|Prophage_134288683 NC_009235 gp18 phage minor tail protein L {Burkholderia phage phi644-2}
64	ORF1_624	243	0.44	Prophage|Prophage_77864689 NC_007497 64 tail assembly protein K phage phiE125 gp19-like {Burkholderia phage Bcep176}
65	ORF1_625	182	0.508	rophage|Prophage_77864688 NC_007497 63 tail assembly protein I phage phiE125 gp20-like {Burkholderia phage Bcep176}
66	ORF1_635	305	0.57	Prophage|Prophage_56692914 NC_006552 RdgC exonuclease {Pseudomonas phage F116}
67	ORF1_653	346	0.445	Prophage|Prophage_61806048 NC_006883 hypothetical protein {Cyanophage P-SSM2}/phosphoribosylaminoimidazole synthetase [Prochlorococcus phage P-SSM2]
99	ORF1_772	423	*
138	ORF1_1221	75	0.467	Predicted ORF;Prophage|Prophage_13095918 NC_002671 Csp {Lactococcus phage bIL312}
140	ORF1_1262	218	0.528	Prophage|Prophage_109521764 NC_008204 gp6 {Mycobacterium phage Qyrzula}/GTP cyclohydrolase I [Vibrio phage KVP40]
156	ORF1_1453	69	0.623	Csp {Lactococcus phage bIL312}
159	ORF1_1531	155	0.452	Prophage|Prophage_9632803 NC_000866 nrdG NrdG anaerobic NTP reductase small subunit {Enterobacteria phage T4}
160	ORF1_1532	706	0.609	Prophage|Prophage_34419247 NC_005083 nrdD anaerobic NTP reductase large subunit {Vibrio phage KVP40}/NrdD anaerobic NTP reductase large subunit [Aeromonas virus Aeh1]
167	ORF1_1691	336	0.449	Prophage|Prophage_17313247 NC_003278 hypothetical protein {Pseudomonas phage phiCTX}
168	ORF1_1699	187	0.567	Prophage|Prophage_9633584 NC_000935 P37 {Acyrthosiphon pisum secondary endosymbiont phage 1}
169	ORF1_1703	110	0.436	Prophage|Prophage_72537704 NC_007145 phage baseplate assembly protein {Burkholderia phage phi52237}
170	ORF1_1709	341	0.736	Prophage|Prophage_34610166 NC_005091 capsid protein E {Burkholderia phage BcepNazgul}
171	ORF1_1710	108	0.537	Prophage|Prophage_9626250 NC_001416 D head-DNA stabilization protein {Enterobacteria phage lambda}
172	ORF1_1711	422	0.629	Prophage|Prophage_9626249 NC_001416 nu3 capsid assembly protein {Enterobacteria phage lambda}
173	ORF1_1712	530	0.728	Prophage|Prophage_34610170 NC_005091 portal protein Lambda B {Burkholderia phage BcepNazgul}
174	ORF1_1713	67	0.735	Prophage|Prophage_34610171 NC_005091 head-tail joining protein Lambda W {Burkholderia phage BcepNazgul}
175	ORF1_1714	642	0.779	rophage|Prophage_148912767 NC_007805 Putative large subunit (GpA homolog) of DNA packaging dimer {Pseudomonas phage F10}
176	ORF1_1715	169	0.485	Prophage|Prophage_9626244 NC_001416 nu1 DNA packaging protein {Enterobacteria phage lambda}
177	ORF1_1721	137	0.496	Prophage|Prophage_33620489 NC_005066 hypothetical protein {Enterobacteria phage RB49}
178	ORF1_1722	60	0.533	Prophage|Prophage_148912825 NC_007805 Putative Holin {Pseudomonas phage F10}
179	ORF1_1726	168	0.619	Prophage|Prophage_9633603 NC_000935 P5 {Acyrthosiphon pisum secondary endosymbiont phage 1}
180	ORF1_1733	98	0.551	Prophage|Prophage_32171125 NC_004914 cII CII protein {Stx2 converting phage II}
181	ORF1_1734	68	0.632	rophage|Prophage_13559844 NC_002730 cro cro {Enterobacteria phage HK620}
182	ORF1_1735	238	0.592	Prophage|Prophage_13559843 NC_002730 cI repressor protein cI {Enterobacteria phage HK620}
183	ORF1_1747	74	0.473	Prophage|Prophage_9626274 NC_001416 xis Excisionase {Enterobacteria phage lambda}
184	ORF1_1748	342	0.438	Prophage|Prophage_9626273 NC_001416 int integration protein {Enterobacteria phage lambda}
192	ORF1_1914	875	*
194	ORF1_1918	761	0.544	Prophage_113200700 NC_008296 196 gp196 {Phage Syn9}/ribonucleotide reductase A subunit [Prochlorococcus phage P-SSM2]
195	ORF1_1919	376	0.556	Prophage|Prophage_113200701 NC_008296 197 gp197 {Phage Syn9}/NrdB ribonucleotide reductase B subunit [Enterobacteria phage RB43]
196	ORF1_1952	230	0.444	Prophage_29566196 NC_004684 gp3 {Mycobacterium phage Rosebush}/BcepGomrgp35 [Burkholderia phage BcepGomr]
197	ORF1_1957	91	0.56	Prophage|Prophage_9630187 NC_001884 yonN histone-like prokaryotic DNA-binding protein family {Bacillus phage SPBc2}/DNA-binding HU protein [Bacillus phage 0305phi8-36]
198	ORF1_1961	207	*
200	ORF1_2001	193	0.554	rophage|Prophage_66391595 NC_007023 tk Tk thymidine kinase {Enterobacteria phage RB43}/Tk thymidine kinase [Enterobacteria phage Phi1]
214	ORF1_2234	61	0.541	Prophage|Prophage_56692917 NC_006552 regulatory protein {Pseudomonas phage F116}
215	ORF1_2237	354	0.528	Prophage|Prophage_118197632 NC_008584 RecA/RadA recombinase {Thermus phage phiYS40}/gp117 [Mycobacterium virus 244]
231	ORF1_2468	264	0.705	Prophage|Prophage_66392008 NC_007022 td dTMP (thymidylate) synthase {Aeromonas phage 31}/putative thymidylate synthase [Geobacillus virus E2]
232	ORF1_2483	70	0.571	Prophage_13095918 NC_002671 Csp {Lactococcus phage bIL312}
234	ORF1_2501	127	0.567	Prophage|Prophage_9632845 NC_000866 vs.6 Vs.6 conserved hypothetical protein {Enterobacteria phage T4}/Enterobacteria phage RB69
239	ORF1_2585	69	0.493	Csp [Lactococcus phage bIL312]
241	ORF1_2597	466	0.725	replicative DNA helicase DnaB/Ban [Escherichia virus P1]
244	ORF1_2649	90	0.567	Prophage_48696914 NC_005882 HU DNA binding protein {Burkholderia phage BcepMu}/DNA-binding HU protein [Bacillus phage 0305phi8-36]
248	ORF1_2735	315	*
253	ORF1_2755	151	0.603	Prophage_38639933 NC_005260 hypothetical protein {Aeromonas phage Aeh1}/putative dUTPase [Xanthomonas phage OP2]
255	ORF1_2836	186	0.571	Prophage_62362261 NC_006949 48 putative bacterial type single strand DNA binding protein (ssb) {Enterobacteria phage ES18}/Ssb [Escherichia virus P1]

## Sheet: T3SS T6SS
VRprofile
Ha-values for the genes in the subject genome against the query databases
No	Synonym	Length
	ORF(aa)	gene hit	Ha-value
1	1_25(443)	T3SS_SctN	0.44	ATPase|Parachlamydia acanthamoebae UV7
2	1_706(160)	T6SS_50122368_TssB	0.825	from Pectobacterium atrosepticum SCRI1043
3	1_707(492)	T6SS_50122367_TssC	0.927	from Pectobacterium atrosepticum SCRI1043
4	1_708(143)	T6SS_50122366_TssE	0.769	from Pectobacterium atrosepticum SCRI1043
5	1_709(590)	T6SS_50122365_TssF	0.842	from Pectobacterium atrosepticum SCRI1043
6	1_710(332)	T6SS_50122364_TssG	0.771	from Pectobacterium atrosepticum SCRI1043
7	1_712(171)	T6SS_50122362_TssJ	0.725	from Pectobacterium atrosepticum SCRI1043
8	1_713(446)	T6SS_50122361_TssK	0.874	from Pectobacterium atrosepticum SCRI1043
9	1_714(258)	T6SS_50122360_TssL	0.733	from Pectobacterium atrosepticum SCRI1043
10	1_715(868)	T6SS_50122359_TssH	0.788	from Pectobacterium atrosepticum SCRI1043
11	1_718(473)	T6SS_50122356_TssA	0.586	from Pectobacterium atrosepticum SCRI1043
12	1_719(1165)	T6SS_50122355_TssM	0.682	from Pectobacterium atrosepticum SCRI1043
13	1_815(439)	T3SS_BscN	0.451	ATPase|Bordetella pertussis Tohama I
14	1_2205(857)	T6SS_108761289_TssH	0.478	from Pectobacterium atrosepticum SCRI1043
15	1_454(421)	T4SE_29653378	0.584	low-affinity inorganic phosphate transporter[Coxiella burnetii RSA 493]
16	1_722(676)	T6SE_ABG57151	0.716	VgrG-2 protein/functional type VI secretion system from a clinical isolate of Aeromonas hydrophila

## Sheet: IS
VRprofile
Ha-values for the genes in the subject genome against the query databases
No	Synonym	IS
no	ORF(aa)	Hit	Ha-value
1	1_235(342)	ISSm4_PEP2	0.532

## Sheet: PAI
VRprofile
Ha-values for the genes in the subject genome against the query databases
	Synonym
No	ORF	Length(aa)	Ha-value	homologous/orthologous (predicted) gene
19	ORF1_133	459	0.691	Orf77 [Photorhabdus luminescens]
20	ORF1_134	458	0.712	Orf77 [Photorhabdus luminescens]
21	ORF1_198	684	0.665	GspD, hypothetical type II secretion protein [Escherichia coli]GenBank: CAE85234.1
22	ORF1_199	524	0.666	GspE, hypothetical type II secretion protein [Escherichia coli]
23	ORF1_200	407	0.636	GspG, hypothetical type II secretion protein [Escherichia coli]GenBank: CAE85231.1
24	ORF1_201	152	0.71	GspG, hypothetical type II secretion protein [Escherichia coli]
27	ORF1_247	436	0.571	aruF [Yersinia pestis]GenBank: CAA21340.1
28	ORF1_248	339	0.468	aruF [Yersinia pestis]GenBank: CAA21340.1
29	ORF1_249	487	0.563	aruD [Yersinia pestis]GenBank: CAA21339.1
30	ORF1_346	323	*	polysialic capsule transport protein [Escherichia coli]GenBank: AAZ04466.1
31	ORF1_393	286	0.451	putative prepilin peptidase A [Escherichia coli]GenBank: CAE85237.1
37	ORF1_421	356	*	OmpA/MotB [Delftia tsuruhatensis]GenBank: ABR28420.1
43	ORF1_519	252	0.468	GloB [Photorhabdus luminescens]GenBank: AAO17226.1
44	ORF1_520	114	0.456	Orf71 [Photorhabdus luminescens]GenBank: AAO17225.1
45	ORF1_522	155	0.716	RnhA [Photorhabdus luminescens], similar to ribonuclease HI Yersinia pestis found in GenBank Accession Number CAC89924"
46	ORF1_523	243	0.757	RnhA [Photorhabdus luminescens], similar to ribonuclease HI Yersinia pestis found in GenBank Accession Number CAC89924"
49	ORF1_536	348	0.695	QueA [Pseudomonas syringae pv. tomato]GenBank: AAF71483.1
50	ORF1_544	404	0.421	conserved hypothetical protein [Streptomyces lividans]GenBank: ABP49156.1
54	ORF1_606	137	0.526	putative phage-related protein [Yersinia enterocolitica W22703]GenBank: CAI77378.1
69	ORF1_692	711	0.655	putative cadaverin decarboxylase [Escherichia coli]GenBank: CAD66195.1
72	ORF1_708	143	0.783	hypothetical protein [Aeromonas hydrophila]GenBank: ABG57137.1;type VI secretion system lysozyme-like protein;similar to Vibrio cholerae VCA0109"
73	ORF1_709	590	0.839	VasA [Aeromonas hydrophila]GenBank: ABG57138.1;similar to Vibrio cholerae VasA (VCA0110); virulence-associated secretion
74	ORF1_710	332	0.792	hypothetical protein [Aeromonas hydrophila]GenBank: ABG57139.1
75	ORF1_711	413	0.671	hypothetical protein [Aeromonas hydrophila]
76	ORF1_712	171	0.825	hypothetical protein [Aeromonas hydrophila],Predicted component of the type VI protein secretion system [Intracellular trafficking, secretion,and vesicular transport]
77	ORF1_713	446	0.908	VasF [Aeromonas hydrophila]
78	ORF1_714	258	0.74	ClpB protein [Aeromonas hydrophila]
79	ORF1_715	868	0.817	hypothetical protein [Aeromonas hydrophila]
80	ORF1_716	513	0.659	VasH [Aeromonas hydrophila]GenBank: ABG57145.1
81	ORF1_717	202	0.505	hypothetical protein [Aeromonas hydrophila]GenBank: ABG57146.1"type VI secretion-associated protein,
82	ORF1_718	473	0.61	hypothetical protein [Aeromonas hydrophila]
83	ORF1_719	1165	0.734	VasK [Aeromonas hydrophila]
84	ORF1_720	470	0.703	hypothetical protein [Aeromonas hydrophila]
85	ORF1_721	95	0.884	hypothetical protein [Aeromonas hydrophila]
86	ORF1_722	676	0.716	VgrG-3 protein [Aeromonas hydrophila]
89	ORF1_740	708	0.718	GspD, hypothetical type II secretion protein [Escherichia coli]
90	ORF1_741	529	0.711	GspE, hypothetical type II secretion protein [Escherichia coli]
91	ORF1_742	424	0.681	GspF, hypothetical type II secretion protein [Escherichia coli]
92	ORF1_743	152	0.697	GspG, hypothetical type II secretion protein [Escherichia coli]
93	ORF1_746	210	0.476	GspJ, hypothetical type II secretion protein [Escherichia coli]
94	ORF1_747	391	0.427	GspK, hypothetical type II secretion protein [Escherichia coli]
95	ORF1_752	1017	*	toxR-activated gene A protein [Vibrio cholerae]GenBank: AAK20777.1
96	ORF1_754	339	0.829	unnamed protein product [Yersinia pestis]
97	ORF1_755	546	0.87	unnamed protein product [Yersinia pestis]GenBank: CAA21361.1
98	ORF1_771	453	0.618	unknown [Shigella flexneri 2a]
99	ORF1_772	423	0.449	nucleotidyltransferase/DNA polymerase [Pseudomonas savastanoi pv. phaseolicola]GenBank: CAI36137.1
122	ORF1_862	366	0.779	hypothetical protein [Edwardsiella tarda]
123	ORF1_869	266	0.598	hypothetical protein [Edwardsiella tarda]
125	ORF1_923	533	0.537	Orf17 [Photorhabdus luminescens]GenBank: AAO17183.1
128	ORF1_985	167	0.455	toxR-activated gene D protein [Vibrio cholerae]
133	ORF1_1157	352	0.429	hypothetical protein [Escherichia coli]
134	ORF1_1162	711	0.631	putative cadaverin decarboxylase [Escherichia coli]
135	ORF1_1163	440	0.643	putative lysin/cadaverin transporter [Escherichia coli]
136	ORF1_1174	250	0.468	KpsU protein [Escherichia coli]
138	ORF1_1221	75	0.507	unknown [Photorhabdus luminescens]
149	ORF1_1309	323	0.464	IntI2 [Escherichia coli]
150	ORF1_1378	165	0.424	Orf58 [Photorhabdus luminescens]
151	ORF1_1380	136	0.581	Orf38 [Photorhabdus luminescens]
152	ORF1_1393	214	0.463	unnamed protein product [Yersinia pestis]GenBank: CAA21355.1
155	ORF1_1432	291	0.426	ATP-binding protein FecE [Shigella flexneri 2a]
156	ORF1_1453	69	0.623	unknown [Photorhabdus luminescens]
163	ORF1_1623	349	0.47	hypothetical protein [Escherichia coli]
164	ORF1_1627	138	0.428	DNA-binding protein stpA (plasmid) [Klebsiella pneumoniae subsp. pneumoniae Kp13]
177	ORF1_1721	137	0.577	putative phage-related protein [Yersinia enterocolitica W22703]GenBank: CAI77378.1
186	ORF1_1773	412	0.494	3-oxoacyl-acyl carrier protein synthase II [Pseudomonas savastanoi pv. phaseolicola]GenBank: CAI36078.1
188	ORF1_1822	457	0.527	aruB [Yersinia pestis]GenBank: CAA21338.1
189	ORF1_1861	354	*	DNA gyrase A subunit [Delftia acidovorans]GenBank: ABS12103.1
192	ORF1_1914	875	0.605	ubiquinone biosynthesis O-methyl-transferase [Delftia acidovorans]GenBank: ABS12101.1
193	ORF1_1915	237	0.54	ubiquinone biosynthesis O-methyl-transferase [Delftia acidovorans]GenBank: ABS12101.1
199	ORF1_1973	486	0.502	Orf33 [Photorhabdus luminescens]GenBank: AAO17199.1
201	ORF1_2004	136	0.463	DNA-binding protein stpA (plasmid) [Klebsiella pneumoniae subsp. pneumoniae Kp13]
211	ORF1_2174	198	0.682	unnamed protein product [Yersinia pestis]
213	ORF1_2213	358	0.43	hypothetical protein [Escherichia coli]
221	ORF1_2291	358	0.846	Orf59 [Photorhabdus luminescens]
222	ORF1_2292	387	0.788	Pgk [Photorhabdus luminescens]
223	ORF1_2293	337	0.706	Epd [Photorhabdus luminescens]
224	ORF1_2294	665	0.794	ktA [Photorhabdus luminescens]
225	ORF1_2361	711	0.684	putative cadaverin decarboxylase [Escherichia coli]
226	ORF1_2362	436	0.702	putative lysin/cadaverin transporter [Escherichia coli]
232	ORF1_2483	70	0.657	unknown [Photorhabdus luminescens]
233	ORF1_2485	504	0.581	putative lysil-tRNA synthetase LysU [Escherichia coli]GenBank: CAD66193.1
235	ORF1_2516	471	0.669	putative oxidoreductase [Yersinia pseudotuberculosis]
239	ORF1_2585	69	0.493	unknown [Photorhabdus luminescens]
241	ORF1_2597	466	0.504	putative DNA binding protein with DNA-dependent ATPase activity [Yersinia pseudotuberculosis]
243	ORF1_2640	432	0.492	utative anaerobic decarboxylate transporter [Shigella flexneri 2a]
260	ORF1_2913	205	0.512	plasmid partition protein ParF (plasmid) [Escherichia coli]
261	ORF1_2921	266	0.485	putative replication protein RepC, partial (plasmid) [Klebsiella pneumoniae]
Microbial Bioinformatics Group at MML, SJTU

## Sheet: ARI
VRprofile
Ha-values for the genes in the subject genome against the query databases
No	Synonym
	ORF	Length(aa)	Ha-value	homologous/orthologous (predicted) gene
12	ORF1_90	308	0.438	IlvE [Acinetobacter baumannii]	AGK44826.1
14	ORF1_108	426	0.725	Gna [Acinetobacter baumannii], GenBank: AGK45063.1
15	ORF1_109	341	0.736	Gne2 [Acinetobacter baumannii]GenBank: AHK10213.1
16	ORF1_114	384	*	PsaB [Acinetobacter baumannii]GenBank: AGK44798.1
17	ORF1_115	196	*	ItrA2 [Acinetobacter baumannii]GenBank: AGK44809.1
18	ORF1_116	639	0.423	Gdr [Acinetobacter baumannii]GenBank: AIT56367.1
27	ORF1_247	436	*	diaminobutyric acid aminotransferase [Pseudomonas aeruginosa]GenBank: AAK01505.1
29	ORF1_249	487	*	putative aldehyde dehydrogenase [Pseudomonas aeruginosa]GenBank: AAK01506.1
43	ORF1_519	252	*	hypothetical protein [Staphylococcus aureus]GenBank: BAA86645.1
68	ORF1_659	115	0.435	ArsC [Acinetobacter baumannii]GenBank: AIK22182.1
98	ORF1_771	453	0.618	unknown	[Shigella flexneri 2a]GenBank: AAL08459.1/ encoded on a novel pathogenicity island carrying,multiple antibiotic resistance genes
106	ORF1_798	351	0.635	PsaF [Acinetobacter baumannii]GenBank: AGK44802.1
107	ORF1_801	230	0.613	PsaC [Acinetobacter baumannii]GenBank: AGK44799.1
108	ORF1_802	390	0.649	PsaB [Acinetobacter baumannii]GenBank: AGK44798.1
109	ORF1_803	332	0.798	PsaA [Acinetobacter baumannii]GenBank: AGK44797.1
120	ORF1_828	296	*	Wzc [Acinetobacter baumannii]GenBank: AGK45060.1"protein tyrosine kinase; involved in capsule export"
125	ORF1_923	533	*	putative aldehyde dehydrogenase [Pseudomonas aeruginosa]GenBank: AAK01506.1
126	ORF1_930	904	*	putative metal-transporting P-type ATPase [Pseudomonas aeruginosa]GenBank: AAN62190.1
127	ORF1_932	159	0.503	FklB [Acinetobacter baumannii]GenBank: AGK45058.1
131	ORF1_1071	589	0.582	AspS [Acinetobacter baumannii]GenBank: AGK44816.1
137	ORF1_1198	820	0.429	putative metal-transporting P-type ATPase [Pseudomonas aeruginosa]GenBank: AAN62190.1
139	ORF1_1229	318	0.676	TrxB [Acinetobacter baumannii]GenBank: AIK22177.1/thioredoxin-disulfide reductase
145	ORF1_1294	205	0.439	putative heme exporter protein A [Pseudomonas aeruginosa]GenBank: AAN62111.1
146	ORF1_1295	219	0.498	putative cytochrome c maturation protein B [Pseudomonas aeruginosa]GenBank: AAN62110.1
147	ORF1_1296	257	0.451	putative heme exporter protein C [Pseudomonas aeruginosa]GenBank: AAN62109.1
148	ORF1_1299	655	0.527	putative cytochrome C-type biogenesis protein CcmF [Pseudomonas aeruginosa]GenBank: AAN62106.1
149	ORF1_1309	323	0.433	IntI1 integrase [Proteus mirabilis]GenBank: AGK07098.1
155	ORF1_1432	291	0.426	ATP-binding protein FecE [Shigella flexneri 2a]GenBank: AAL08451.1
158	ORF1_1507	231	0.424	putative response-regulator ArmR [Pseudomonas aeruginosa]GenBank: AAN62112.1
190	ORF1_1867	179	0.441	membrane protein, partial [Proteus mirabilis]GenBank: AGK06941.1
193	ORF1_1915	237	*	unknown [Staphylococcus aureus]GenBank: AAL26680.1
202	ORF1_2005	335	0.606	type 1 capsule synthesis gene [Staphylococcus aureus]GenBank: AAA64648.1
203	ORF1_2007	337	0.567	Gne1 [Acinetobacter baumannii]GenBank: AGK45079.1
204	ORF1_2008	302	0.53	GalU [Acinetobacter baumannii]GenBank: AGK45076.1
229	ORF1_2459	161	0.46	lipoprotein signal peptidase [Acinetobacter baumannii]GenBank: AGK36655.1
230	ORF1_2462	523	0.434	MviN [Acinetobacter baumannii]GenBank: AIT56339.1
233	ORF1_2485	504	*	AspS [Acinetobacter baumannii] GenBank: AGK44816.1
238	ORF1_2584	206	0.432	FklB [Acinetobacter baumannii]GenBank: AGK44435.1
240	ORF1_2594	549	0.455	Gpi [Acinetobacter baumannii]GenBank: AGK44812.1
242	ORF1_2636	548	*	GroEL/Integrase fusion protein [Proteus mirabilis]GenBank: AGK07107.1
243	ORF1_2640	432	0.492	putative anaerobic decarboxylate transporter [Shigella flexneri 2a]GenBank: AAL08434.1
246	ORF1_2676	552	0.582	putative amino acid transport protein [Pseudomonas aeruginosa]GenBank: AAK01502.1
256	ORF1_2852	420	*	Gna [Acinetobacter baumannii]GenBank: AHK10212.1
257	ORF1_2853	396	0.49	WecB [Acinetobacter baumannii]GenBank: AIT56376.1
258	ORF1_2911	439	0.686	regulatory protein [Proteus mirabilis]Serine/threonine protein kinase HipA, toxin component of the HipAB toxin-antitoxin module
259	ORF1_2912	84	0.6	transcriptional regulator [Proteus mirabilis]GenBank: AGK07115.1
262	ORF1_2922	379	0.58	integrase [Proteus mirabilis]GenBank: AGK07047.1;imilar to Salmonella enterica subsp. enterica serovar Typhimurium DT104 integrase
Microbial Bioinformatics Group at MML, SJTU
						s
